# Supplementary material for: Role of the AP-5 adaptor protein complex in late endosome-to-Golgi retrieval
Source: PLoS Biol. 2018 Jan 30;16(1):e2004411. doi: 10.1371/journal.pbio.2004411 (PMC5806898; doi:10.1371/journal.pbio.2004411)
Supplement: S1 Data — This table also contains the complete results of the dynamic organellar maps MR plot analysis and the GO-term enrichment analysis of proteins shifting in response to AP-5 ablation. AP, adaptor protein. (XLSX) [file pbio.2004411.s003.xlsx]

## Sheet: Fibroblast intensity data
Majority protein IDs	Protein names	Gene names	Lysosomal	LFQ AP5_Pat4_R1	LFQ AP5_Pat4_R2	LFQ AP5_Pat5_R1	LFQ AP5_Pat5_R2	LFQ AP5_Pat6_R1	LFQ AP5_Pat6_R2	LFQ AP5_Pat8_R1	LFQ AP5_Pat8_R2
Q9NRG9;Q9NRG9-2	Aladin	AAAS		28.1305	27.8674	28.5434	27.1979	28.5642	27.1857	28.442	27.4297
Q86V21;Q86V21-2;Q86V21-3	Acetoacetyl-CoA synthetase	AACS		30.8036	29.9183	30.8394	30.2007	30.6528	30.0814	31.2197	30.5619
Q7RTV5	Thioredoxin-like protein AAED1	AAED1		27.8241	28.7089	28.8109	28.1687	29.4768	28.766	29.6964	27.7839
Q6PD74;Q6PD74-2	Alpha- and gamma-adaptin-binding protein p34	AAGAB		28.9175	28.2936	29.4152	28.239	28.8678	28.3582	29.4153	29.0515
Q2M2I8;Q2M2I8-2	AP2-associated protein kinase 1	AAK1		31.8981	31.7818	31.9596	31.7361	31.8458	31.9171	31.6575	31.7197
Q9H7C9;Q9H7C9-3;Q9H7C9-2	Mth938 domain-containing protein	AAMDC		29.8817	30.3478	30.1188	30.1091	30.2839	29.9545	30.1836	30.0018
Q13685	Angio-associated migratory cell protein	AAMP		31.3295	30.4287	30.585	30.4375	30.0522	30.341	30.3266	29.9856
Q9Y312	Protein AAR2 homolog	AAR2		28.7881	28.4567	29.0072	29.226	28.8479	29.1876	28.8163	28.7978
P49588;P49588-2	Alanine--tRNA ligase, cytoplasmic	AARS		34.8745	35.1003	34.8234	35.4416	35.1349	35.3444	34.9602	35.3526
Q5JTZ9	Alanine--tRNA ligase, mitochondrial	AARS2		29.4157	29.4037	29.4641	29.5776	29.2801	29.4503	29.2995	29.1054
Q9BTE6;Q9BTE6-2;Q9BTE6-3	Alanyl-tRNA editing protein Aarsd1	AARSD1		29.9292	29.9225	30.6115	30.3626	30.1164	29.9109	30.5156	29.9719
Q9NRN7	L-aminoadipate-semialdehyde dehydrogenase-phosphopantetheinyl transferase	AASDHPPT		29.5128	29.4429	29.3172	29.6031	29.333	29.5436	29.0462	28.9872
Q9UDR5	Alpha-aminoadipic semialdehyde synthase, mitochondrial;Lysine ketoglutarate reductase;Saccharopine dehydrogenase	AASS		29.8093	29.701	29.213	29.458	29.543	29.5738	29.6438	29.1399
Q9NY61	Protein AATF	AATF		28.3598	28.0532	29.1542	28.0924	28.3711	28.4319	29.2163	28.5013
P80404	4-aminobutyrate aminotransferase, mitochondrial	ABAT		29.7976	29.5507	29.1567	28.6881	28.4205	27.8135	27.7836	25.6137
O95477	ATP-binding cassette sub-family A member 1	ABCA1		29.4511	26.1258	28.6682	24.9967	29.2871	26.4427	28.4633	26.5374
Q8N139	ATP-binding cassette sub-family A member 6	ABCA6		28.134	27.6159	26.894	26.9472	27.4462	27.0475	27.2108	24.2206
O94911-3	ATP-binding cassette sub-family A member 8	ABCA8		29.9571	29.6027	24.6844	24.1733	23.0325	24.1963	26.0088	27.4655
Q9NRK6	ATP-binding cassette sub-family B member 10, mitochondrial	ABCB10		29.0063	28.5793	27.756	28.5789	28.2385	29.0163	28.8169	28.3734
Q9NP58;Q9NP58-4	ATP-binding cassette sub-family B member 6, mitochondrial	ABCB6		29.5542	28.9063	30.0454	29.5174	30.5071	29.3409	30.252	29.6879
O75027;O75027-3;O75027-2	ATP-binding cassette sub-family B member 7, mitochondrial	ABCB7		28.8408	29.2444	28.125	29.0203	28.6898	29.2289	28.1837	28.6658
Q9NUT2;Q9NUT2-5;Q9NUT2-4;Q9NUT2-2;Q9NUT2-3	ATP-binding cassette sub-family B member 8, mitochondrial	ABCB8		27.1664	27.8895	27.143	27.4682	27.3435	27.4523	27.5186	26.3049
P33527;P33527-9;P33527-2;P33527-3;P33527-5;P33527-4;P33527-6;P33527-7;P33527-8	Multidrug resistance-associated protein 1	ABCC1		32.773	32.8236	32.7333	32.8831	31.916	31.9803	32.5147	32.4954
Q5T3U5;Q5T3U5-2	Multidrug resistance-associated protein 7	ABCC10		25.6974	25.1505	25.3367	25.2127	25.3833	24.1872	25.8723	25.6679
O15438;O15438-4;O15438-2	Canalicular multispecific organic anion transporter 2	ABCC3		24.9544	25.2816	27.9578	27.5797	26.7959	26.3023	24.593	NaN
O15439;O15439-3;O15439-4	Multidrug resistance-associated protein 4	ABCC4		29.5638	29.4397	29.8978	30.0771	30.0453	30.0966	29.9754	30.1155
O60706;O60706-2	ATP-binding cassette sub-family C member 9	ABCC9		25.8529	28.2107	29.0902	29.8493	21.9088	23.1199	23.9971	22.8262
P33897	ATP-binding cassette sub-family D member 1	ABCD1		29.2023	28.4849	29.2935	28.7565	29.1642	28.5502	30.0205	29.4802
P28288;P28288-2	ATP-binding cassette sub-family D member 3	ABCD3		32.0775	32.4064	32.4016	32.1207	32.2239	32.5777	32.4401	32.2463
P61221	ATP-binding cassette sub-family E member 1	ABCE1		32.79	32.987	32.7322	33.1642	32.6408	33.0691	32.6627	33.1325
Q8NE71;Q8NE71-2	ATP-binding cassette sub-family F member 1	ABCF1		32.3488	32.5777	32.6345	32.6171	32.5086	32.6196	32.7964	32.9199
Q9UG63;Q9UG63-2	ATP-binding cassette sub-family F member 2	ABCF2		32.2023	32.5962	32.5904	32.6915	32.4159	32.7319	32.492	32.8387
Q9NUQ8;Q9NUQ8-2	ATP-binding cassette sub-family F member 3	ABCF3		30.6699	30.5544	30.4486	30.7031	30.6479	30.6724	30.5957	30.0401
Q9NUJ1	Mycophenolic acid acyl-glucuronide esterase, mitochondrial	ABHD10		31.7026	31.5705	31.0538	31.0753	30.9964	30.2626	31.1685	30.9487
Q8NFV4;Q8NFV4-4;Q8NFV4-6	Alpha/beta hydrolase domain-containing protein 11	ABHD11		29.4296	28.769	28.0727	28.2346	29.0579	28.3458	28.6256	28.6391
Q8N2K0;Q8N2K0-2;Q8N2K0-3	Monoacylglycerol lipase ABHD12	ABHD12		30.7475	30.3752	30.5609	30.2115	30.5842	30.4667	30.2743	29.8882
Q96IU4	Alpha/beta hydrolase domain-containing protein 14B	ABHD14B		32.487	31.4237	32.4386	32.6758	31.7811	31.2532	32.2661	31.4433
O95870;O95870-2	Abhydrolase domain-containing protein 16A	ABHD16A		29.1881	28.7984	28.9792	28.8525	29.3024	29.1056	29.1071	29.3689
Q96GS6;Q96GS6-2;Q96GS6-3;Q96GS6-4	Alpha/beta hydrolase domain-containing protein 17A	ABHD17A		27.9374	28.2779	26.9771	26.021	27.1179	26.5593	27.5793	26.8276
Q5VST6;Q5VST6-2	Alpha/beta hydrolase domain-containing protein 17B	ABHD17B		25.7359	NaN	25.6868	26.1951	26.7756	26.1368	26.4788	26.3136
P08910	Abhydrolase domain-containing protein 2	ABHD2		25.3206	25.2218	24.8763	25.2631	25.3905	25.5364	25.0654	25.7626
Q9BV23	Monoacylglycerol lipase ABHD6	ABHD6		26.1023	25.4984	25.8996	25.8205	27.4155	25.3746	27.3695	26.519
Q8IZP0-3;Q8IZP0-5;Q8IZP0-9	Abl interactor 1	ABI1		32.2932	32.3422	32.0687	33.0233	31.9377	32.8925	31.8149	32.4725
Q9NYB9;Q9NYB9-2;Q9NYB9-4;Q9NYB9-3	Abl interactor 2	ABI2		29.02	28.7804	29.4317	29.0245	29.2919	28.9359	29.0071	28.3889
Q7Z7G0;Q7Z7G0-2;Q7Z7G0-3	Target of Nesh-SH3	ABI3BP		23.9084	25.178	23.852	25.2547	23.0099	24.8255	24.1605	24.1095
P00519-2;P00519	Tyrosine-protein kinase ABL1	ABL1		28.5871	28.6683	28.744	28.198	28.2996	28.2603	28.3506	28.3689
P42684;P42684-6;P42684-7;P42684-5;P42684-4;P42684-10;P42684-2;P42684-3;P42684-8	Abelson tyrosine-protein kinase 2	ABL2		24.3097	24.8555	24.8502	25.4803	25.562	24.9503	25.0485	23.3928
O14639-2;O14639;O14639-6;O14639-5;O14639-4;O14639-3	Actin-binding LIM protein 1	ABLIM1		27.382	28.392	27.4834	28.5539	28.6731	29.4955	28.4853	28.8321
O94929-3;O94929-2	Actin-binding LIM protein 3	ABLIM3		29.121	29.1319	29.5442	29.0299	28.6566	28.3746	27.0598	26.0826
Q12979;Q12979-4	Active breakpoint cluster region-related protein	ABR		31.5689	31.437	30.922	30.9469	31.2052	31.0642	31.0417	31.2238
Q9P1F3	Costars family protein ABRACL	ABRACL		29.7507	29.1302	30.0563	29.5067	30.7187	29.4099	29.7266	29.3526
Q8N961;Q8N961-2	Ankyrin repeat and BTB/POZ domain-containing protein 2	ABTB2		27.4499	26.0725	28.1924	28.8176	28.3726	28.4128	27.7975	27.8679
P09110;P09110-2	3-ketoacyl-CoA thiolase, peroxisomal	ACAA1		32.0808	32.2347	32.1442	32.6611	32.1227	32.6881	31.8564	32.3825
P42765	3-ketoacyl-CoA thiolase, mitochondrial	ACAA2		33.8092	33.8791	33.3863	33.6689	33.7188	33.8653	33.4718	33.7433
Q13085;Q13085-4;Q13085-2	Acetyl-CoA carboxylase 1;Biotin carboxylase	ACACA		32.2971	32.3277	32.3579	32.04	32.4891	32.3163	32.2936	31.9517
Q6JQN1;Q6JQN1-2;Q6JQN1-5;Q6JQN1-4	Acyl-CoA dehydrogenase family member 10	ACAD10		28.0201	27.9896	27.7853	27.9141	28.1859	27.9405	NaN	28.0572
Q709F0;Q709F0-3;Q709F0-2	Acyl-CoA dehydrogenase family member 11	ACAD11		31.1769	30.1842	29.9933	30.2499	29.9185	29.7583	29.0437	29.2944
Q9UKU7;Q9UKU7-3;Q9UKU7-2	Isobutyryl-CoA dehydrogenase, mitochondrial	ACAD8		28.7778	28.6235	28.5577	28.6258	28.5907	28.3217	28.5544	28.2358
Q9H845	Acyl-CoA dehydrogenase family member 9, mitochondrial	ACAD9		32.3306	32.4713	32.3558	32.4595	32.3125	32.6238	32.203	32.4009
P11310;P11310-2	Medium-chain specific acyl-CoA dehydrogenase, mitochondrial	ACADM		31.2383	30.7811	31.3696	30.8568	31.885	31.3451	31.4041	31.0872
P16219	Short-chain specific acyl-CoA dehydrogenase, mitochondrial	ACADS		29.8949	29.2815	29.5802	29.0923	29.8796	29.4628	29.5138	28.8724
P45954;P45954-2	Short/branched chain specific acyl-CoA dehydrogenase, mitochondrial	ACADSB		30.8004	30.393	30.5374	30.5053	30.4863	30.8642	29.8679	30.0352
P49748;P49748-3;P49748-2	Very long-chain specific acyl-CoA dehydrogenase, mitochondrial	ACADVL		34.2993	34.5337	34.5354	34.7494	34.0909	34.6068	32.9912	33.8391
P16112-2;P16112;P16112-3	Aggrecan core protein;Aggrecan core protein 2	ACAN		NaN	NaN	22.4923	NaN	NaN	21.5497	30.633	28.9425
Q15057	Arf-GAP with coiled-coil, ANK repeat and PH domain-containing protein 2	ACAP2		31.8973	31.9498	31.3736	31.975	31.8183	31.9135	31.309	31.3845
Q96P50;Q96P50-1;Q96P50-4	Arf-GAP with coiled-coil, ANK repeat and PH domain-containing protein 3	ACAP3		27.1319	26.5138	27.1323	25.5776	26.7455	25.944	25.8895	24.8199
P24752	Acetyl-CoA acetyltransferase, mitochondrial	ACAT1		34.1658	34.0806	33.9315	33.9932	33.9742	34.2339	33.9865	33.7999
Q9BWD1;Q9BWD1-2	Acetyl-CoA acetyltransferase, cytosolic	ACAT2		32.4415	32.0307	31.8901	32.1086	32.4669	32.4567	31.7042	31.6404
Q9H3P7	Golgi resident protein GCP60	ACBD3		32.7336	32.7375	32.6144	32.8633	32.5877	32.8935	32.704	32.8334
Q5T8D3-3;Q5T8D3-2;Q5T8D3;Q5T8D3-4	Acyl-CoA-binding domain-containing protein 5	ACBD5		28.2837	28.7026	27.6983	28.19	28.5459	28.4543	27.8403	28.1598
Q9BR61	Acyl-CoA-binding domain-containing protein 6	ACBD6		28.989	28.4629	29.0522	28.1182	29.4983	27.9928	29.5875	27.9931
P12821;P12821-2;P12821-3;P12821-4	Angiotensin-converting enzyme;Angiotensin-converting enzyme, soluble form	ACE		31.8379	30.8689	31.2144	31.0256	31.1339	30.2863	31.0705	30.2524
Q9UKV3;Q9UKV3-2;Q9UKV3-3	Apoptotic chromatin condensation inducer in the nucleus	ACIN1		31.974	32.3134	32.5411	32.5414	32.1876	32.4318	32.3439	32.624
P53396	ATP-citrate synthase	ACLY		35.2237	35.6962	34.8993	35.2885	35.072	35.333	34.9395	35.6504
P21399	Cytoplasmic aconitate hydratase	ACO1		32.8857	33.5202	32.9456	33.5588	32.4995	33.1026	32.243	33.117
Q99798	Aconitate hydratase, mitochondrial	ACO2		34.8621	34.8066	34.7598	34.5403	34.7556	34.6583	34.9912	34.8848
Q86TX2	Acyl-coenzyme A thioesterase 1	ACOT1		31.5843	31.6522	31.0445	31.1742	32.4866	32.3591	32.5459	32.362
Q8WXI4;Q8WXI4-2	Acyl-coenzyme A thioesterase 11	ACOT11		27.8113	28.5431	27.2461	27.0951	27.0904	27.1308	26.5915	26.3369
Q9NPJ3;Q9NPJ3-2	Acyl-coenzyme A thioesterase 13;Acyl-coenzyme A thioesterase 13, N-terminally processed	ACOT13		31.1458	30.1986	30.7108	29.9252	30.3068	29.471	30.1977	29.9446
O00154-4;O00154;O00154-6;O00154-7;O00154-5;O00154-2;O00154-3	Cytosolic acyl coenzyme A thioester hydrolase	ACOT7		32.6456	32.8415	32.7986	32.6244	32.4758	32.829	32.3419	33.1251
O14734	Acyl-coenzyme A thioesterase 8	ACOT8		29.7932	29.1616	29.3098	28.8914	29.3134	28.7878	28.8948	28.8817
Q9Y305;Q9Y305-3;Q9Y305-2;Q9Y305-4	Acyl-coenzyme A thioesterase 9, mitochondrial	ACOT9		32.8135	32.6635	32.4326	32.4169	32.6242	33.0168	32.9641	33.0608
Q15067;Q15067-2;Q15067-3	Peroxisomal acyl-coenzyme A oxidase 1	ACOX1		31.0685	31.0932	31.0691	31.2101	31.0933	31.0866	31.402	31.6665
Q99424	Peroxisomal acyl-coenzyme A oxidase 2	ACOX2		29.6334	29.4471	29.2209	29.7241	29.0908	29.3803	29.3971	29.0638
O15254;O15254-2	Peroxisomal acyl-coenzyme A oxidase 3	ACOX3		31.3595	30.4058	31.067	30.3398	31.444	30.7144	32.848	32.158
P24666;P24666-4;P24666-3	Low molecular weight phosphotyrosine protein phosphatase	ACP1		31.4091	31.01	31.4004	31.0291	31.1285	30.7191	31.589	31.01
P11117	Lysosomal acid phosphatase	ACP2	1	28.5604	29.3957	29.2413	29.1133	29.5234	29.1672	29.3605	29.2989
Q9NPH0;Q9NPH0-2	Lysophosphatidic acid phosphatase type 6	ACP6		25.4486	NaN	26.76	25.9042	27.7622	27.0375	26.2845	25.2473
Q96CM8;Q96CM8-3;Q96CM8-2;Q96CM8-4	Acyl-CoA synthetase family member 2, mitochondrial	ACSF2		30.5073	29.6438	30.1311	29.3301	30.4013	29.1487	30.5314	29.5371
Q4G176	Acyl-CoA synthetase family member 3, mitochondrial	ACSF3		29.0998	29.4516	29.0473	29.2304	28.8897	28.9153	28.7772	29.1648
P33121;P33121-3	Long-chain-fatty-acid--CoA ligase 1	ACSL1		31.1337	31.2118	30.7843	30.8463	31.3201	31.1981	30.9371	30.8244
O95573	Long-chain-fatty-acid--CoA ligase 3	ACSL3		32.807	32.4124	33.108	32.5809	32.8729	32.7654	33.1019	32.7507
O60488;O60488-2	Long-chain-fatty-acid--CoA ligase 4	ACSL4		31.7034	31.692	31.9387	31.6136	31.9365	32.0178	32.2268	31.7186
Q9NUB1;Q9NUB1-2;Q9NUB1-3;Q9NUB1-4	Acetyl-coenzyme A synthetase 2-like, mitochondrial	ACSS1		28.0879	27.0423	28.2143	28.3935	28.9244	28.0103	27.3606	26.5949
Q9NR19;Q9NR19-2	Acetyl-coenzyme A synthetase, cytoplasmic	ACSS2		31.3967	30.6196	30.9197	30.0623	31.2507	30.1109	30.8974	30.067
Q9H6R3;Q9H6R3-2	Acyl-CoA synthetase short-chain family member 3, mitochondrial	ACSS3		29.5224	28.9163	29.4844	29.2439	29.9485	29.6622	29.8405	29.4287
P62736	Actin, aortic smooth muscle	ACTA2		34.8497	34.7233	36.1984	36.466	36.0389	36.1169	38.5126	38.3045
P60709	Actin, cytoplasmic 1;Actin, cytoplasmic 1, N-terminally processed	ACTB		33.0732	32.8594	33.4254	33.3135	33.4656	32.653	33.57	33.8614
Q562R1	Beta-actin-like protein 2	ACTBL2		34.9995	28.5888	29.8093	28.9741	29.779	34.9116	29.514	35.7939
P63261	Actin, cytoplasmic 2;Actin, cytoplasmic 2, N-terminally processed	ACTG1		39.1963	38.9847	39.2957	39.5216	39.3633	39.2299	39.6944	39.7776
O96019;O96019-2	Actin-like protein 6A	ACTL6A		31.7067	31.8244	31.9138	31.4731	31.3586	31.4072	31.4979	31.4147
P12814-3	Alpha-actinin-1	ACTN1		36.4263	36.3416	37.1414	37.5154	37.142	37.1616	37.8129	37.8616
P12814	Alpha-actinin-1	ACTN1		30.5083	29.9422	31.2837	29.7453	31.6097	31.3107	32.3481	31.8094
O43707;O43707-2;O43707-3	Alpha-actinin-4	ACTN4		37.669	37.7191	37.9718	38.2518	37.9595	38.4003	38.3788	38.6187
Q9NZ32	Actin-related protein 10	ACTR10		31.0588	31.2497	31.1791	30.8658	31.2533	31.3727	30.9792	30.6612
P61163	Alpha-centractin	ACTR1A		33.9011	32.7436	34.3627	33.3907	34.4184	33.0392	34.5119	33.4506
P42025	Beta-centractin	ACTR1B		33.5442	33.165	33.738	33.26	33.6231	33.6611	33.411	33.101
P61160;P61160-2	Actin-related protein 2	ACTR2		35.0769	34.4883	35.0739	34.9457	35.2153	34.592	35.0555	34.8029
P61158	Actin-related protein 3	ACTR3		35.8071	35.442	35.8199	36.0397	35.934	35.6216	35.7445	35.6469
Q9H9F9	Actin-related protein 5	ACTR5		26.2041	26.4022	26.2423	27.1724	27.4732	26.9492	27.0854	27.1022
Q9GZN1	Actin-related protein 6	ACTR6		25.7172	24.8349	25.8317	24.9604	25.7592	25.2467	25.3116	26.5592
Q9H981;Q9H981-2	Actin-related protein 8	ACTR8		27.7817	27.368	28.167	26.2118	28.3927	26.9826	27.242	26.8237
Q04771	Activin receptor type-1	ACVR1		28.0963	26.6581	27.3013	26.7052	28.0448	27.3445	27.7705	26.8195
P27037;P27037-2	Activin receptor type-2A	ACVR2A		25.551	25.9908	24.517	25.2183	24.2973	24.0445	27.2359	27.2255
P37023	Serine/threonine-protein kinase receptor R3	ACVRL1		25.6394	26.3547	26.1274	26.2278	NaN	25.656	NaN	25.397
Q03154;Q03154-2;Q03154-4;Q03154-3	Aminoacylase-1	ACY1		30.6448	31.076	30.2762	30.6265	30.474	30.7059	29.891	30.7098
P07311	Acylphosphatase-1	ACYP1		27.9181	26.8085	28.1946	25.4999	27.9106	26.5008	27.1106	25.8331
P14621	Acylphosphatase-2	ACYP2		29.06	29.3116	28.6902	29.3725	28.2034	29.5684	28.2707	28.3668
P00813	Adenosine deaminase	ADA		32.4787	32.3065	31.667	31.4439	31.9013	31.8608	31.8778	31.1232
Q6DHV7-2;Q6DHV7;Q6DHV7-3	Adenosine deaminase-like protein	ADAL		27.4041	27.6259	27.1208	27.9099	27.5109	27.4314	27.0182	26.9558
O14672	Disintegrin and metalloproteinase domain-containing protein 10	ADAM10		33.0786	33.0927	32.3783	32.2081	32.1127	32.3866	31.7715	31.6579
O43184;O43184-3;O43184-4;O43184-2	Disintegrin and metalloproteinase domain-containing protein 12	ADAM12		23.9166	28.0967	25.5665	28.6533	22.6771	29.711	26.81	29.587
Q13444-10;Q13444-9	Disintegrin and metalloproteinase domain-containing protein 15	ADAM15		27.1619	27.0279	27.2192	26.6269	27.9201	26.9311	26.3371	26.3541
P78536;P78536-2	Disintegrin and metalloproteinase domain-containing protein 17	ADAM17		29.458	30.0897	28.8104	30.0081	29.4608	30.2048	29.06	29.73
Q9BZ11;Q9BZ11-2	Disintegrin and metalloproteinase domain-containing protein 33	ADAM33		27.0584	26.3546	27.1047	26.3767	27.2478	26.8286	26.1636	25.7611
Q13443;Q13443-2	Disintegrin and metalloproteinase domain-containing protein 9	ADAM9		31.8924	31.9838	31.0954	31.5781	31.472	31.8656	31.088	31.417
Q9UHI8	A disintegrin and metalloproteinase with thrombospondin motifs 1	ADAMTS1		29.2879	30.0942	28.5721	29.1049	27.6471	28.0518	30.455	29.8846
P58397;P58397-3	A disintegrin and metalloproteinase with thrombospondin motifs 12	ADAMTS12		24.6334	23.5799	25.1547	22.9406	24.7648	23.8684	28.5321	27.5953
O95450;O95450-2	A disintegrin and metalloproteinase with thrombospondin motifs 2	ADAMTS2		26.673	26.757	26.9363	26.1785	27.534	27.2266	28.7236	28.7516
Q9UKP4	A disintegrin and metalloproteinase with thrombospondin motifs 7	ADAMTS7		24.4808	24.8843	24.8615	25.4698	23.6288	22.9588	26.6451	26.1112
Q8N6G6;Q8N6G6-4;Q8N6G6-1	ADAMTS-like protein 1	ADAMTSL1		29.2249	28.6216	28.1861	27.6735	28.4021	27.7282	27.1447	28.0501
P55265;P55265-4;P55265-5;P55265-3;P55265-2	Double-stranded RNA-specific adenosine deaminase	ADAR		32.0547	31.897	32.2696	32.3739	32.0379	32.0307	32.5157	32.37
P78563;P78563-5;P78563-3	Double-stranded RNA-specific editase 1	ADARB1		29.3732	27.6773	29.4029	29.1127	29.2968	28.7049	29.2651	28.0934
Q86TW2;Q86TW2-2;Q86TW2-3	Uncharacterized aarF domain-containing protein kinase 1	ADCK1		23.6899	23.9734	23.8544	23.674	24.6314	23.4459	23.8032	23.4822
Q8NI60;Q8NI60-3;Q8NI60-2;Q8NI60-4	Atypical kinase ADCK3, mitochondrial	ADCK3		27.6319	28.7607	27.2794	26.1349	26.7812	26.2363	26.0842	NaN
Q96D53;Q96D53-2	AarF domain-containing protein kinase 4	ADCK4		28.7769	26.3479	28.2221	27.4491	28.5774	26.5665	27.2503	26.2032
O60266;O60266-2	Adenylate cyclase type 3	ADCY3		26.4904	26.339	26.6547	26.7829	26.6672	26.5918	26.604	26.5392
P51828	Adenylate cyclase type 7	ADCY7		26.8949	25.8289	27.4823	26.7321	27.2685	26.6108	27.2743	27.8244
O60503	Adenylate cyclase type 9	ADCY9		29.7982	29.9795	29.4368	29.9278	29.9273	29.9043	30.0104	30.1513
P35611-3;P35611;P35611-5	Alpha-adducin	ADD1		34.6766	34.7071	33.8047	33.7849	33.5169	33.3359	33.0001	32.9948
P35612;P35612-2;P35612-8;P35612-9;P35612-4;P35612-3	Beta-adducin	ADD2		28.4602	27.7998	23.0785	23.8431	23.8663	23.9852	NaN	NaN
Q9UEY8-2	Gamma-adducin	ADD3		34.9386	34.4566	33.6747	33.7918	33.4017	33.5241	32.8137	32.8291
P00325;P00325-2	Alcohol dehydrogenase 1B	ADH1B		30.7367	29.9735	30.0418	30.7078	28.6637	28.1489	28.5376	29.1209
P11766	Alcohol dehydrogenase class-3	ADH5		35.4966	35.7162	35.2137	36.1206	34.5713	35.2637	35.363	35.893
Q9BV57;Q9BV57-2	1,2-dihydroxy-3-keto-5-methylthiopentene dioxygenase	ADI1		32.0232	31.3294	32.7701	31.4962	32.3615	31.6296	31.2823	30.7029
Q15847	Adipogenesis regulatory factor	ADIRF		34.0953	32.2868	34.0624	32.7385	33.8786	32.635	32.5426	31.4537
P55263;P55263-3;P55263-2;P55263-4	Adenosine kinase	ADK		33.2832	32.9771	32.9865	32.8654	33.0962	32.6936	32.5747	32.1723
Q9H2P0	Activity-dependent neuroprotector homeobox protein	ADNP		29.7962	30.0266	29.8269	29.9923	29.8427	30.345	29.6456	29.9333
Q96SZ5	2-aminoethanethiol dioxygenase	ADO		28.4624	28.3384	28.8419	29.0812	29.007	29.0557	28.6808	28.9478
Q9BRR6;Q9BRR6-2	ADP-dependent glucokinase	ADPGK		31.4177	31.1286	31.4137	31.076	31.347	31.1186	31.16	31.1509
P54922	[Protein ADP-ribosylarginine] hydrolase	ADPRH		24.8393	25.0083	25.3857	25.3028	26.9893	27.1311	27.7386	27.0981
Q9NX46	Poly(ADP-ribose) glycohydrolase ARH3	ADPRHL2		31.1256	30.9662	30.7036	30.7449	30.9638	30.9611	30.938	30.6735
P08913	Alpha-2A adrenergic receptor	ADRA2A		26.1334	27.1852	27.8056	29.2084	26.9977	27.2818	26.2191	27.2814
P25098	Beta-adrenergic receptor kinase 1	ADRBK1		28.4776	29.6051	29.1812	29.9963	28.8979	29.4217	29.2771	29.9151
Q16186	Proteasomal ubiquitin receptor ADRM1	ADRM1		29.9078	30.6169	29.8515	30.4934	29.8267	31.1675	29.9816	30.3638
P30566;P30566-2	Adenylosuccinate lyase	ADSL		32.5005	31.5565	32.1773	31.7929	32.0693	31.6834	31.747	31.5791
P30520	Adenylosuccinate synthetase isozyme 2	ADSS		32.6587	32.7017	33.0523	33.0457	32.6131	32.6802	33.1995	32.4807
Q8IUX7;Q8IUX7-2	Adipocyte enhancer-binding protein 1	AEBP1		28.2007	27.1758	30.0263	29.1068	30.0641	29.6764	30.9946	30.7557
Q08117;Q08117-2	Amino-terminal enhancer of split	AES		26.8001	27.7746	27.0395	27.7227	26.678	28.5073	26.0203	27.0685
Q8N556;Q8N556-2	Actin filament-associated protein 1	AFAP1		30.6819	30.6331	31.4078	31.5852	30.9048	30.6567	31.7535	31.924
Q9UHB7;Q9UHB7-2	AF4/FMR2 family member 4	AFF4		26.9333	28.6299	27.6691	28.2832	27.7613	28.5691	28.0615	28.8042
Q9Y4W6	AFG3-like protein 2	AFG3L2		32.483	32.2552	32.1131	31.9697	32.1434	32.1346	32.2424	32.1852
Q6ULP2;Q6ULP2-5;Q6ULP2-2;Q6ULP2-4;Q6ULP2-3	Aftiphilin	AFTPH		26.2682	27.0496	26.34	27.0296	26.484	27.1914	26.3583	27.4938
P20933	N(4)-(beta-N-acetylglucosaminyl)-L-asparaginase;Glycosylasparaginase alpha chain;Glycosylasparaginase beta chain	AGA	1	30.8713	30.4387	30.4879	30.3583	31.5057	31.1568	31.3819	31.4943
Q9UPQ3;Q9UPQ3-2;Q9UPQ3-3	Arf-GAP with GTPase, ANK repeat and PH domain-containing protein 1	AGAP1		24.7885	NaN	23.4922	23.9807	24.1033	24.6267	23.2444	24.6431
Q99490;Q99490-2	Arf-GAP with GTPase, ANK repeat and PH domain-containing protein 2	AGAP2		27.5782	25.97	27.062	26.8848	27.5579	26.3167	NaN	26.1101
Q96P47;Q96P47-2;Q96P47-4;Q96P47-5;Q96P47-3;Q96P47-6	Arf-GAP with GTPase, ANK repeat and PH domain-containing protein 3	AGAP3		28.3418	28.2543	28.1198	27.9102	28.165	28.4512	26.8479	27.4102
P52594;P52594-2;P52594-3;P52594-4	Arf-GAP domain and FG repeat-containing protein 1	AGFG1		32.1845	32.1111	31.9803	31.7477	31.6969	31.3159	31.5186	30.7513
O95081;O95081-2	Arf-GAP domain and FG repeat-containing protein 2	AGFG2		28.5323	27.5954	28.5496	27.0422	27.2226	27.7809	27.1878	26.9384
Q53H12	Acylglycerol kinase, mitochondrial	AGK		31.2508	31.4487	30.4241	31.5145	30.7562	31.1994	30.4991	30.9677
P35573;P35573-2;P35573-3	Glycogen debranching enzyme;4-alpha-glucanotransferase;Amylo-alpha-1,6-glucosidase	AGL		32.1798	32.1716	32.4118	32.3836	32.3324	32.1811	32.7379	32.4216
Q9UL18	Protein argonaute-1	AGO1		29.4176	29.2382	29.5172	29.3785	29.6711	29.5858	28.814	28.538
Q9UKV8;Q9UKV8-2	Protein argonaute-2	AGO2		30.9944	30.3957	30.6367	30.537	30.9439	30.7355	31.4351	30.7848
Q9H9G7;Q9H9G7-2	Protein argonaute-3	AGO3		28.5815	28.9515	28.6835	28.8015	28.473	28.826	28.7385	28.9594
Q99943	1-acyl-sn-glycerol-3-phosphate acyltransferase alpha	AGPAT1		29.0053	28.8837	28.8717	28.2986	28.5913	27.9295	28.7299	28.6096
O15120;O15120-2	1-acyl-sn-glycerol-3-phosphate acyltransferase beta	AGPAT2		25.5763	26.7708	26.7849	26.0326	26.7025	25.6735	26.7409	25.6918
Q9NRZ7;Q9NRZ7-2;Q9NRZ7-3	1-acyl-sn-glycerol-3-phosphate acyltransferase gamma	AGPAT3		29.4244	29.1854	29.3555	29.3616	29.2401	29.6513	29.4445	29.4823
Q9NRZ5;Q9NRZ5-2	1-acyl-sn-glycerol-3-phosphate acyltransferase delta	AGPAT4		27.0699	28.1617	28.0531	28.9334	28.3369	28.6192	27.8113	28.4013
Q86UL3	Glycerol-3-phosphate acyltransferase 4	AGPAT6		29.0105	28.1544	29.1116	28.4767	28.7658	29.0776	28.4195	28.7277
O00116	Alkyldihydroxyacetonephosphate synthase, peroxisomal	AGPS		32.4495	32.323	32.5425	32.4691	32.7623	32.1141	32.7402	32.6692
Q6RW13	Type-1 angiotensin II receptor-associated protein	AGTRAP		30.035	29.5937	30.4167	30.1577	30.3289	30.1764	30.6088	30.3758
Q8WYP5;Q8WYP5-2;Q8WYP5-3	Protein ELYS	AHCTF1		30.6361	30.4176	30.7377	30.5333	30.7805	30.4638	30.8458	30.7951
P23526;P23526-2	Adenosylhomocysteinase	AHCY		33.8566	34.495	34.0359	34.3149	34.2575	34.6525	33.7363	34.1937
O43865;O43865-2	Putative adenosylhomocysteinase 2	AHCYL1		32.1112	32.9707	32.0798	32.7972	32.3929	32.8723	31.9157	32.3044
Q96HN2;Q96HN2-2;Q96HN2-4;Q96HN2-3	Putative adenosylhomocysteinase 3	AHCYL2		26.3825	27.3158	26.5503	27.3989	26.2763	28.3239	26.1111	27.5113
Q5TGY3	AT-hook DNA-binding motif-containing protein 1	AHDC1		27.2764	27.0948	26.2422	27.0197	25.1584	27.3347	26.4545	27.2469
Q8N157;Q8N157-3;Q8N157-2	Jouberin	AHI1		22.8742	NaN	23.0603	23.9293	23.4826	24.2721	23.2791	23.7918
Q09666	Neuroblast differentiation-associated protein AHNAK	AHNAK		40.0802	40.2364	39.9526	40.1563	40.1617	40.4344	39.7459	39.9164
Q09666-2	Neuroblast differentiation-associated protein AHNAK	AHNAK		24.5459	24.9571	24.2456	24.9955	24.9369	25.9343	24.6087	NaN
Q8IVF2-3	Protein AHNAK2	AHNAK2		36.9905	37.2561	36.5029	36.6451	36.8122	37.0891	36.5825	36.3901
Q8IVF2	Protein AHNAK2	AHNAK2		25.9315	24.7787	23.3122	NaN	24.6664	NaN	23.8458	24.246
P35869	Aryl hydrocarbon receptor	AHR		27.7445	27.4768	28.0048	27.9694	27.2599	27.0777	27.0975	27.2044
O95433;O95433-2	Activator of 90 kDa heat shock protein ATPase homolog 1	AHSA1		33.6538	33.1181	33.643	32.7984	33.6533	32.8288	33.2791	32.8881
Q96BJ3;Q96BJ3-3	Axin interactor, dorsalization-associated protein	AIDA		31.5824	31.5085	31.3498	31.0737	31.5024	30.9784	31.1608	31.1681
O95831;O95831-3;O95831-2;O95831-5	Apoptosis-inducing factor 1, mitochondrial	AIFM1		33.3815	33.3275	33.3455	33.5233	33.2707	33.3658	33.6076	33.3777
Q9BRQ8;Q9BRQ8-2	Apoptosis-inducing factor 2	AIFM2		30.4172	29.4823	30.3663	30.7193	30.207	29.8339	31.9191	31.0443
Q9NVV5;Q9NVV5-3;Q9NVV5-2;Q9NVV5-6;Q9NVV5-5;Q9NVV5-4	Androgen-induced gene 1 protein	AIG1		27.2977	28.0347	28.2152	29.0671	27.11	28.8349	26.4281	26.8069
Q9Y4K1	Absent in melanoma 1 protein	AIM1		30.6356	30.442	30.8333	30.6024	31.6477	31.1954	27.4752	26.862
Q12904;Q12904-2	Aminoacyl tRNA synthase complex-interacting multifunctional protein 1;Endothelial monocyte-activating polypeptide 2	AIMP1		32.9265	33.2761	33.0535	33.3383	33.028	33.118	33.2633	33.563
Q13155	Aminoacyl tRNA synthase complex-interacting multifunctional protein 2	AIMP2		31.008	31.7043	30.9045	32.0958	30.6066	31.8939	31.4737	32.1598
O00170	AH receptor-interacting protein	AIP		32.7548	32.6656	32.5986	32.5237	32.6668	32.3771	32.3119	32.0728
P00568	Adenylate kinase isoenzyme 1	AK1		34.5456	34.679	33.7794	34.4952	34.3429	34.6262	33.0113	34.0025
P54819;P54819-2;P54819-3;P54819-5;P54819-6;P54819-4	Adenylate kinase 2, mitochondrial;Adenylate kinase 2, mitochondrial, N-terminally processed	AK2		32.2984	32.4657	31.8679	32.4808	32.1668	32.3624	32.0459	32.3303
Q9UIJ7;Q9UIJ7-3;Q9UIJ7-2	GTP:AMP phosphotransferase AK3, mitochondrial	AK3		32.7836	33.2481	31.7398	32.6477	32.4902	33.2398	31.9699	32.7769
P27144	Adenylate kinase 4, mitochondrial	AK4		30.9754	31.406	29.5204	30.0496	28.6245	30.0589	30.7881	32.077
Q9Y6K8;Q9Y6K8-3;Q9Y6K8-2	Adenylate kinase isoenzyme 5	AK5		30.7603	31.2919	31.5405	31.0121	31.5018	31.4975	30.0037	29.9592
Q9Y3D8;Q9Y3D8-2	Adenylate kinase isoenzyme 6	AK6		29.2613	29.8723	28.4507	28.9778	28.768	28.892	28.5376	29.3579
Q92667;Q92667-2	A-kinase anchor protein 1, mitochondrial	AKAP1		26.9578	27.9983	27.4219	27.393	27.4689	27.7709	26.7846	27.2493
O43572	A-kinase anchor protein 10, mitochondrial	AKAP10		28.3995	28.0983	28.8331	28.6959	29.3563	28.7717	29.7077	27.9883
Q9UKA4	A-kinase anchor protein 11	AKAP11		29.7681	29.7341	29.8768	29.747	29.644	29.7311	29.7194	29.6861
Q02952;Q02952-3	A-kinase anchor protein 12	AKAP12		35.993	35.6894	34.9993	35.2282	34.4209	34.7352	36.4424	36.4825
Q12802;Q12802-2;Q12802-4	A-kinase anchor protein 13	AKAP13		31.1758	31.0767	31.4604	31.1475	31.6692	31.3864	31.5168	31.0009
Q02040;Q02040-2;Q02040-3	A-kinase anchor protein 17A	AKAP17A		29.5597	29.5259	30.4524	28.9487	29.0365	29.4153	29.6984	29.7633
Q9Y2D5-6;Q9Y2D5-4	A-kinase anchor protein 2	AKAP2		34.7938	34.973	34.9349	34.967	34.7162	34.7232	35.1054	34.7915
Q9Y2D5	A-kinase anchor protein 2	AKAP2		23.684	NaN	23.5989	25.1898	NaN	23.8094	23.5248	22.9635
Q9P0M2	A-kinase anchor protein 7 isoform gamma	AKAP7		25.3382	23.4389	25.3829	24.6235	26.5347	24.1557	24.0916	23.3576
O43823	A-kinase anchor protein 8	AKAP8		29.6306	30.4502	29.0918	30.8268	29.0124	30.467	29.6271	30.5079
Q9ULX6;Q9ULX6-2	A-kinase anchor protein 8-like	AKAP8L		30.2532	29.461	30.1325	29.3172	30.2608	29.3971	30.3934	30.1781
Q99996-2;Q99996;Q99996-5;Q99996-3;Q99996-6	A-kinase anchor protein 9	AKAP9		30.9042	31.0882	30.9999	31.1612	31.0392	31.1037	31.2303	31.2454
P14550	Alcohol dehydrogenase [NADP(+)]	AKR1A1		33.1225	33.7423	33.0709	33.6618	33.1396	33.638	32.9978	33.5037
P15121	Aldose reductase	AKR1B1		34.9035	34.9125	34.819	35.2708	34.9886	34.9753	33.7353	34.0507
Q04828	Aldo-keto reductase family 1 member C1	AKR1C1		34.7366	34.447	33.4564	33.7389	34.2733	33.718	31.8741	32.1434
P52895	Aldo-keto reductase family 1 member C2	AKR1C2		29.1065	26.7724	27.7201	26.3346	28.4479	NaN	25.772	NaN
P42330	Aldo-keto reductase family 1 member C3	AKR1C3		35.5637	35.2211	34.6843	34.6413	35.1255	34.4225	34.3073	34.1134
P42330-2	Aldo-keto reductase family 1 member C3	AKR1C3		26.3887	25.1341	24.8729	NaN	25.498	NaN	25.2341	NaN
P51857;P51857-2	3-oxo-5-beta-steroid 4-dehydrogenase	AKR1D1		29.9768	31.5176	29.5371	31.0823	30.5987	30.438	28.8674	29.7254
O43488	Aflatoxin B1 aldehyde reductase member 2	AKR7A2		33.0923	32.9456	32.8856	32.597	33.013	32.3921	32.3174	32.3644
P31749;P31749-2	RAC-alpha serine/threonine-protein kinase	AKT1		31.3553	31.3919	31.2931	31.2486	31.1285	31.4615	31.0823	30.8198
Q96B36;Q96B36-3;Q96B36-2	Proline-rich AKT1 substrate 1	AKT1S1		28.981	28.7652	28.4538	28.7755	27.8323	29.1315	28.6463	28.5267
P31751;P31751-2	RAC-beta serine/threonine-protein kinase	AKT2		29.9973	30.1675	29.6757	29.5673	29.0663	29.4443	29.6784	29.4055
Q9Y243;Q9Y243-2	RAC-gamma serine/threonine-protein kinase	AKT3		28.4273	27.9106	28.7886	28.1936	28.9899	28.1869	29.404	28.2622
Q9H8T0;Q9H8T0-2	AKT-interacting protein	AKTIP		27.9195	27.8896	27.9581	27.466	28.0335	27.8209	28.8335	28.8122
P13716;P13716-2	Delta-aminolevulinic acid dehydratase	ALAD		31.7842	31.2753	31.3281	31.5196	31.3903	31.6913	30.5392	30.3475
Q13740-2;Q13740	CD166 antigen	ALCAM		32.5541	32.1953	32.8944	32.523	32.7291	32.8446	32.666	33.3407
Q8IZ83;Q8IZ83-3	Aldehyde dehydrogenase family 16 member A1	ALDH16A1		31.2492	30.9083	30.5831	30.5843	30.4547	30.3142	30.4214	29.7456
P54886;P54886-2	Delta-1-pyrroline-5-carboxylate synthase;Glutamate 5-kinase;Gamma-glutamyl phosphate reductase	ALDH18A1		33.6414	34.0123	33.5156	34.0909	33.6977	34.2242	33.7625	34.6005
P00352	Retinal dehydrogenase 1	ALDH1A1		30.8388	29.6341	32.2962	33.3636	28.3694	26.4108	29.1789	27.3259
P47895	Aldehyde dehydrogenase family 1 member A3	ALDH1A3		33.2081	33.4044	32.1558	32.1967	33.986	33.783	32.5986	33.0773
P30837	Aldehyde dehydrogenase X, mitochondrial	ALDH1B1		32.7103	32.8014	32.3742	33.1959	31.9306	32.1979	33.7434	34.7656
O75891;O75891-3;O75891-2	Cytosolic 10-formyltetrahydrofolate dehydrogenase	ALDH1L1		29.0405	29.8427	29.0524	29.2939	29.3073	29.6498	29.0952	29.3003
Q3SY69	Mitochondrial 10-formyltetrahydrofolate dehydrogenase	ALDH1L2		34.0562	33.889	33.6325	34.1602	33.9562	33.9388	34.5117	34.3714
P05091;P05091-2	Aldehyde dehydrogenase, mitochondrial	ALDH2		32.6107	31.9259	32.183	31.4548	32.3627	31.9645	31.6581	30.9604
P30838	Aldehyde dehydrogenase, dimeric NADP-preferring	ALDH3A1		27.9194	24.1781	28.6236	25.6646	29.7003	26.5498	NaN	NaN
P51648;P51648-2	Fatty aldehyde dehydrogenase	ALDH3A2		32.1683	32.3912	31.3965	31.9304	32.2733	32.3969	31.3342	31.1251
P43353;P43353-2	Aldehyde dehydrogenase family 3 member B1	ALDH3B1		28.1457	28.2031	27.89	28.0227	28.1485	28.5765	25.2593	26.8995
P30038;P30038-2;P30038-3	Delta-1-pyrroline-5-carboxylate dehydrogenase, mitochondrial	ALDH4A1		30.6497	30.7885	30.4379	31.0912	30.3887	31.1156	29.8886	30.6533
Q02252;Q02252-2	Methylmalonate-semialdehyde dehydrogenase [acylating], mitochondrial	ALDH6A1		32.2673	31.8728	31.7705	31.8541	31.6165	31.7429	30.919	30.9761
P49419-2;P49419;P49419-4	Alpha-aminoadipic semialdehyde dehydrogenase	ALDH7A1		33.3258	32.9495	33.9752	33.7686	33.8516	33.3746	33.8479	33.2746
P49189;P49189-2	4-trimethylaminobutyraldehyde dehydrogenase	ALDH9A1		33.9838	34.2931	33.7063	33.9055	33.8233	33.9407	33.2949	33.7298
P04075;P04075-2	Fructose-bisphosphate aldolase A	ALDOA		37.3048	37.5033	37.1329	37.4329	36.9106	37.2617	37.2273	37.7533
P09972	Fructose-bisphosphate aldolase C	ALDOC		32.1632	31.7283	32.1791	31.757	32.1852	32.089	31.8691	32.1242
Q9BT22;Q9BT22-2	Chitobiosyldiphosphodolichol beta-mannosyltransferase	ALG1		30.2387	30.767	30.0188	30.8787	30.6216	30.1938	30.8095	29.9971
Q5BKT4;Q5I7T1	Dol-P-Glc:Glc(2)Man(9)GlcNAc(2)-PP-Dol alpha-1,2-glucosyltransferase;Putative Dol-P-Glc:Glc(2)Man(9)GlcNAc(2)-PP-Dol alpha-1,2-glucosyltransferase	ALG10;ALG10B		27.4844	25.6321	26.8333	25.6079	26.6428	25.3835	26.4657	25.5659
Q2TAA5	GDP-Man:Man(3)GlcNAc(2)-PP-Dol alpha-1,2-mannosyltransferase	ALG11		28.822	28.9097	28.7513	28.8859	28.9761	29.168	28.9347	29.1804
Q9NP73-2;Q9NP73	Putative bifunctional UDP-N-acetylglucosamine transferase and deubiquitinase ALG13	ALG13		27.4271	28.1166	27.3777	28.0662	28.2425	28.1734	27.7223	28.0008
Q96F25	UDP-N-acetylglucosamine transferase subunit ALG14 homolog	ALG14		24.4892	24.7084	25.3035	NaN	25.1057	25.2864	24.4937	NaN
Q9H553;Q9H553-2	Alpha-1,3/1,6-mannosyltransferase ALG2	ALG2		32.0193	32.1091	32.0412	31.9165	32.215	31.5241	32.3628	31.691
Q92685;Q92685-2	Dol-P-Man:Man(5)GlcNAc(2)-PP-Dol alpha-1,3-mannosyltransferase	ALG3		26.2838	25.9243	26.8405	26.0183	26.6536	25.4334	26.4209	26.196
Q9Y673;Q9Y673-2	Dolichyl-phosphate beta-glucosyltransferase	ALG5		30.4843	30.1841	30.8046	30.5668	30.9846	30.1225	31.0396	30.6192
Q9BVK2;Q9BVK2-2	Probable dolichyl pyrophosphate Glc1Man9GlcNAc2 alpha-1,3-glucosyltransferase	ALG8		27.7686	27.5866	27.8096	28.0475	27.9158	27.7715	27.1993	27.4377
Q9H6U8;Q9H6U8-3;Q9H6U8-2;Q9H6U8-4	Alpha-1,2-mannosyltransferase ALG9	ALG9		29.2966	28.8256	28.9439	28.4784	29.6498	28.236	28.308	29.0869
Q13686	Alkylated DNA repair protein alkB homolog 1	ALKBH1		24.57	23.9872	25.1737	24.3564	24.7454	24.9658	24.7918	24.8171
Q96Q83	Alpha-ketoglutarate-dependent dioxygenase alkB homolog 3	ALKBH3		27.4643	25.4683	27.048	26.2918	26.1553	26.5894	26.3079	NaN
Q9NXW9	Alpha-ketoglutarate-dependent dioxygenase alkB homolog 4	ALKBH4		27.2288	26.6786	26.9371	26.7889	26.4105	26.2141	25.8273	26.016
Q6P6C2;Q6P6C2-1;Q6P6C2-3	RNA demethylase ALKBH5	ALKBH5		29.5447	28.416	29.7891	28.4803	29.4141	28.512	29.0394	28.7973
Q9BT30	Alpha-ketoglutarate-dependent dioxygenase alkB homolog 7, mitochondrial	ALKBH7		25.6853	NaN	25.2471	24.0415	24.8603	24.4895	24.7924	24.1065
Q86TB3	Alpha-protein kinase 2	ALPK2		30.1086	28.8286	30.1655	29.9428	30.3636	29.9688	30.7209	29.6762
P05186;P05186-3;P05186-2	Alkaline phosphatase, tissue-nonspecific isozyme	ALPL		28.7522	25.4881	23.2737	NaN	22.5146	NaN	NaN	NaN
Q96Q42	Alsin	ALS2		28.3502	28.4771	28.9429	28.4753	28.8216	28.3388	29.4027	27.4559
Q86V81	THO complex subunit 4	ALYREF		32.602	32.6558	32.8596	32.6305	32.4372	32.7427	32.8586	32.9004
P17707	S-adenosylmethionine decarboxylase proenzyme;S-adenosylmethionine decarboxylase alpha chain;S-adenosylmethionine decarboxylase beta chain	AMD1		NaN	24.1409	23.9076	24.2995	23.9283	24.1239	24.9576	24.0679
Q9Y303	Putative N-acetylglucosamine-6-phosphate deacetylase	AMDHD2		28.928	28.8412	27.6772	27.6318	28.0576	28.6031	28.2088	28.9197
Q9UKV5	E3 ubiquitin-protein ligase AMFR	AMFR		27.497	27.3086	27.8033	27.5247	27.7747	28.3434	27.6718	27.7558
Q86SJ2	Amphoterin-induced protein 2	AMIGO2		NaN	26.2231	26.4252	24.8889	27.1833	25.4896	28.6272	27.9546
Q8IY63;Q8IY63-2	Angiomotin-like protein 1	AMOTL1		28.3686	27.0289	27.9217	25.9594	28.1912	26.9977	29.2032	27.9008
Q9Y2J4;Q9Y2J4-2;Q9Y2J4-4;Q9Y2J4-3	Angiomotin-like protein 2	AMOTL2		26.979	27.8791	27.0897	27.5604	26.0329	27.4818	27.8479	27.8375
Q01433;Q01433-2;Q01433-5;Q01433-3;Q01433-4	AMP deaminase 2	AMPD2		32.0329	31.8572	32.1741	31.6888	32.2016	32.008	31.4788	31.168
Q01432;Q01432-5;Q01432-4;Q01432-6;Q01432-3	AMP deaminase 3	AMPD3		29.5131	29.2116	29.3306	28.1684	28.337	28.5275	28.1742	25.9745
P49418;P49418-2	Amphiphysin	AMPH		30.4348	29.7136	30.9012	30.2061	31.1069	31.1372	30.9417	30.456
Q86W34;Q86W34-5	Archaemetzincin-2	AMZ2		26.9249	26.2368	27.3289	26.4158	27.4864	27.392	26.0006	26.2907
Q9H1A4	Anaphase-promoting complex subunit 1	ANAPC1		28.8188	29.0848	29.0408	29.1324	28.8229	28.4648	28.6532	28.8782
Q9UM13	Anaphase-promoting complex subunit 10	ANAPC10		27.1533	26.6385	27.0024	26.217	27.3076	25.7801	27.0903	25.3167
Q9NYG5	Anaphase-promoting complex subunit 11	ANAPC11		24.2088	24.5407	NaN	25.0944	25.0309	24.4401	24.0653	NaN
Q9BS18	Anaphase-promoting complex subunit 13	ANAPC13		21.9828	25.7811	23.0641	26.0758	22.5808	25.7029	22.9265	24.5447
Q96DE5	Anaphase-promoting complex subunit 16	ANAPC16		26.113	26.3679	26.6491	26.3225	26.6927	26.1895	26.6037	25.9229
Q9UJX6;Q9UJX6-2	Anaphase-promoting complex subunit 2	ANAPC2		27.8958	30.6305	28.4624	30.2561	28.9929	29.416	29.8258	29.9334
Q9UJX5;Q9UJX5-3;Q9UJX5-2	Anaphase-promoting complex subunit 4	ANAPC4		27.955	28.1706	28.0404	28.3963	27.966	28.3567	28.5099	27.838
Q9UJX4;Q9UJX4-3	Anaphase-promoting complex subunit 5	ANAPC5		28.0683	28.0804	28.0183	28.6759	28.8434	27.6694	28.1024	27.7579
Q9UJX3;Q9UJX3-2	Anaphase-promoting complex subunit 7	ANAPC7		29.5939	28.8005	29.2733	28.8073	29.7008	29.0337	29.8149	29.2611
Q5VTE6;Q5VTE6-2	Protein angel homolog 2	ANGEL2		24.6584	26.772	NaN	25.1426	24.1507	26.9449	24.4047	25.4256
Q9UKU9;Q9UKU9-2	Angiopoietin-related protein 2	ANGPTL2		29.5755	29.3545	29.1678	28.6135	29.2461	27.0656	28.1336	26.9445
P16157;P16157-21;P16157-8;P16157-5;P16157-16;P16157-3;P16157-12;P16157-14;P16157-9;P16157-6;P16157-7;P16157-4;P16157-13;P16157-10;P16157-15;P16157-11;P16157-2	Ankyrin-1	ANK1		31.8102	31.0732	30.5718	30.3032	30.6066	29.3341	30.4438	29.9446
Q01484	Ankyrin-2	ANK2		33.1989	32.4972	31.7474	31.0195	31.6643	30.8041	32.9158	32.4114
Q9P2R3;Q9P2R3-2;Q9P2R3-4	Rabankyrin-5	ANKFY1		32.5127	32.6389	31.8941	32.5208	32.0986	32.2795	31.7796	32.0068
Q9HCJ1;Q9HCJ1-2	Progressive ankylosis protein homolog	ANKH		25.2376	25.768	25.731	27.6214	25.1946	25.3948	NaN	27.1248
Q8IWZ3-6;Q8IWZ3;Q8IWZ3-4	Ankyrin repeat and KH domain-containing protein 1	ANKHD1		29.5202	29.909	29.7072	29.8817	29.7817	30.143	29.9078	30.2743
Q9P2G1	Ankyrin repeat and IBR domain-containing protein 1	ANKIB1		30.4134	29.548	30.4102	29.5654	30.4654	29.4734	30.5915	29.5363
Q86XL3;Q86XL3-2	Ankyrin repeat and LEM domain-containing protein 2	ANKLE2		30.6665	30.865	31.0285	30.7414	31.0799	31.044	31.175	31.2738
Q8IV38	Ankyrin repeat and MYND domain-containing protein 2	ANKMY2		30.2307	29.6775	30.3377	28.8938	29.9163	29.3778	29.8685	29.1684
Q6UB99	Ankyrin repeat domain-containing protein 11	ANKRD11		26.9183	26.1949	25.5235	26.167	25.1671	26.3393	26.02	26.7174
Q8IZ07	Ankyrin repeat domain-containing protein 13A	ANKRD13A		31.6209	32.187	31.9697	32.2297	31.7585	32.1272	31.2634	31.2987
Q8N6S4;Q8N6S4-2	Ankyrin repeat domain-containing protein 13C	ANKRD13C		24.6414	NaN	24.2845	25.0836	24.7216	24.5347	24.6868	24.5216
Q6P6B7;Q6P6B7-2	Ankyrin repeat domain-containing protein 16	ANKRD16		26.4451	24.9558	26.5696	NaN	27.2498	NaN	26.0446	NaN
O75179;O75179-2;O75179-7;O75179-6	Ankyrin repeat domain-containing protein 17	ANKRD17		31.0007	31.1625	31.3064	31.0364	31.0275	31.1306	31.4014	31.3243
Q96NW4	Ankyrin repeat domain-containing protein 27	ANKRD27		28.1406	28.0184	27.5308	27.6303	27.7743	28.1905	28.1186	27.9601
O15084;O15084-1;O15084-4;O15084-2	Serine/threonine-protein phosphatase 6 regulatory ankyrin repeat subunit A	ANKRD28		30.87	31.0275	30.3499	30.8903	30.7029	30.9937	30.2421	30.6196
Q8N283	Ankyrin repeat domain-containing protein 35	ANKRD35		27.9227	27.3126	25.3578	30.078	25.439	30.511	26.899	29.9906
Q6AI12	Ankyrin repeat domain-containing protein 40	ANKRD40		25.2678	25.3333	26.0471	26.1921	26.2996	25.5977	26.6729	25.841
Q8N8A2;Q8N8A2-2;Q8N8A2-4;Q8N8A2-3	Serine/threonine-protein phosphatase 6 regulatory ankyrin repeat subunit B	ANKRD44		27.4265	27.0362	28.8619	27.9035	28.114	27.8165	30.0368	29.0327
Q8WVL7	Ankyrin repeat domain-containing protein 49	ANKRD49		NaN	NaN	24.0346	23.4665	25.551	23.5754	23.6395	NaN
Q9ULJ7;Q9ULJ7-2	Ankyrin repeat domain-containing protein 50	ANKRD50		27.6239	26.1864	28.1066	26.9696	28.631	27.3608	28.8949	27.6869
Q8NB46	Serine/threonine-protein phosphatase 6 regulatory ankyrin repeat subunit C	ANKRD52		28.025	27.2748	28.5054	27.5016	28.5774	26.438	28.7377	28.5416
Q6NXT1;Q6NXT1-2	Ankyrin repeat domain-containing protein 54	ANKRD54		27.5405	26.2769	26.4776	26.2942	24.517	26.1161	26.4525	26.1837
Q92625	Ankyrin repeat and SAM domain-containing protein 1A	ANKS1A		28.6565	28.3459	28.473	28.0547	28.3011	28.6663	28.5237	28.5214
Q9H8Y5	Ankyrin repeat and zinc finger domain-containing protein 1	ANKZF1		28.1435	27.3217	28.013	27.6169	28.2641	27.2056	28.1686	28.3346
Q9NQW6;Q9NQW6-2	Actin-binding protein anillin	ANLN		25.3059	26.0664	27.139	27.0618	26.3359	26.0198	26.9353	26.0288
Q9NW15;Q9NW15-5;Q9NW15-2;Q9NW15-3;Q9NW15-4	Anoctamin-10	ANO10		31.4983	31.5913	31.8514	31.9942	31.8798	32.258	32.0687	31.9466
Q4KMQ2;Q4KMQ2-3;Q4KMQ2-2;Q4KMQ2-4	Anoctamin-6	ANO6		31.2177	31.1994	31.4031	31.3253	31.3696	31.4492	31.6133	31.6111
P39687	Acidic leucine-rich nuclear phosphoprotein 32 family member A	ANP32A		32.9503	33.0149	33.064	32.9068	32.9444	32.6099	32.6989	32.6447
Q92688;Q92688-2	Acidic leucine-rich nuclear phosphoprotein 32 family member B	ANP32B		26.5398	30.035	27.6068	30.426	27.6989	29.8704	27.4728	30.561
Q9BTT0;Q9BTT0-3	Acidic leucine-rich nuclear phosphoprotein 32 family member E	ANP32E		29.7616	29.9614	30.1518	30.2498	29.7505	29.885	30.3276	29.934
P15144	Aminopeptidase N	ANPEP		36.4247	36.2755	36.4457	36.48	36.7159	36.4373	35.5215	35.782
Q9H6X2;Q9H6X2-5;Q9H6X2-4;Q9H6X2-6;Q9H6X2-2;Q9H6X2-3	Anthrax toxin receptor 1	ANTXR1		31.0464	30.5366	31.0567	31.2618	31.0952	31.2511	30.0505	29.9356
P58335-4;P58335;P58335-2;P58335-3	Anthrax toxin receptor 2	ANTXR2		31.8202	31.3212	30.5383	30.4532	30.3732	30.516	30.6237	29.6163
P04083	Annexin A1	ANXA1		37.3302	37.7035	37.259	37.5682	37.5416	37.65	36.7177	37.3014
P50995;P50995-2	Annexin A11	ANXA11		35.4153	35.169	35.2853	35.2075	35.3481	35.1344	35.0057	34.971
P07355;P07355-2;A6NMY6	Annexin A2;Putative annexin A2-like protein	ANXA2;ANXA2P2		38.6887	38.9316	38.6716	39.0887	38.9063	39.3656	38.7319	39.1236
P12429	Annexin A3	ANXA3		29.6407	29.5328	29.8776	30.412	30.3764	30.5198	29.5142	28.723
P09525	Annexin A4	ANXA4		35.4298	35.2187	35.0733	34.8897	35.4492	34.9646	34.3808	34.3832
P08758	Annexin A5	ANXA5		38.2112	38.2271	37.5628	37.608	38.2011	38.3404	37.7908	37.7099
P08133;P08133-2	Annexin A6	ANXA6		36.9112	37.3447	36.8765	37.4761	37.1867	37.7174	37.2673	37.8958
P20073;P20073-2	Annexin A7	ANXA7		34.3327	33.9128	34.3223	33.835	34.0201	33.5286	33.5682	33.5714
Q06278	Aldehyde oxidase	AOX1		31.3006	30.4361	31.2503	31.0877	30.4788	29.4905	29.6658	26.9875
Q10567-3;Q10567-4	AP-1 complex subunit beta-1	AP1B1		31.9121	32.4052	32.1802	32.5131	32.1159	32.7169	32.0901	32.1807
Q10567;Q10567-2	AP-1 complex subunit beta-1	AP1B1		NaN	28.5743	27.333	28.9972	27.1399	28.5974	28.3043	28.7563
O43747;O43747-2	AP-1 complex subunit gamma-1	AP1G1		31.9917	32.4582	32.1471	32.343	32.0511	31.9903	32.1374	32.3943
Q9BXS5;Q9BXS5-2	AP-1 complex subunit mu-1	AP1M1		32.9638	32.9363	32.5417	32.6787	32.4537	32.9935	32.2501	32.9643
P61966;P61966-2	AP-1 complex subunit sigma-1A	AP1S1		29.1486	29.2402	29.1186	29.1721	29.5395	29.0351	29.4475	28.8816
P56377;P56377-2	AP-1 complex subunit sigma-2	AP1S2		30.1758	30.3212	30.2541	29.9456	30.4405	30.2501	31.1864	30.3996
O95782;O95782-2	AP-2 complex subunit alpha-1	AP2A1		34.7104	34.9865	34.7276	35.1061	34.3696	34.8089	34.4293	34.9778
O94973-2;O94973-3	AP-2 complex subunit alpha-2	AP2A2		33.0459	32.8494	32.8216	33.0792	33.1209	33.138	32.7627	32.445
O94973	AP-2 complex subunit alpha-2	AP2A2		28.6816	26.3295	28.3744	27.6405	28.172	26.9524	27.4606	25.586
P63010;P63010-2;P63010-3	AP-2 complex subunit beta	AP2B1		34.7859	35.0969	34.7172	35.2829	34.4592	35.0772	34.4847	34.8317
Q96CW1;Q96CW1-2	AP-2 complex subunit mu	AP2M1		33.4943	33.9454	33.5426	34.098	33.46	34.2781	33.4087	34.2236
P53680;P53680-2	AP-2 complex subunit sigma	AP2S1		31.5686	31.843	31.3346	31.8637	31.2482	31.5618	30.6803	32.1022
O00203;O00203-3	AP-3 complex subunit beta-1	AP3B1		33.1653	33.7805	33.3555	33.7051	33.328	33.8006	33.1712	33.5642
O14617-5;O14617;O14617-2;O14617-4;O14617-3	AP-3 complex subunit delta-1	AP3D1		33.4072	33.66	33.3956	33.4636	33.3414	33.6173	33.1234	33.2993
Q9Y2T2	AP-3 complex subunit mu-1	AP3M1		31.2606	32.1964	31.5699	32.2551	31.7869	32.4451	31.3268	32.2591
P53677	AP-3 complex subunit mu-2	AP3M2		29.3387	28.2208	29.1512	28.6138	29.0996	28.9263	28.2614	28.8421
Q92572	AP-3 complex subunit sigma-1	AP3S1		31.6971	31.2421	31.3466	31.2511	31.4075	31.3183	31.5099	31.3051
Q9Y6B7	AP-4 complex subunit beta-1	AP4B1		27.8771	27.4756	28.1303	27.1118	28.6971	28.263	28.2696	28.4718
Q9UPM8;Q9UPM8-2	AP-4 complex subunit epsilon-1	AP4E1		28.2845	27.2106	27.9923	27.1786	28.3983	28.2128	28.4518	27.5908
O00189	AP-4 complex subunit mu-1	AP4M1		27.0112	27.7867	27.3786	27.4764	27.3785	27.8108	27.3824	27.8064
Q9Y587;Q9Y587-2;Q9Y587-3;Q9Y587-4	AP-4 complex subunit sigma-1	AP4S1		26.6392	26.7609	26.6122	26.629	27.2745	27.0019	26.8963	26.9828
Q9H0R1	AP-5 complex subunit mu-1	AP5M1		26.8747	25.6518	26.0464	NaN	26.4488	25.9759	25.59	25.5064
Q9NUS5	AP-5 complex subunit sigma-1	AP5S1		27.1289	25.6789	25.6335	NaN	25.4395	26.1657	24.2407	NaN
O43299;O43299-2	AP-5 complex subunit zeta-1	AP5Z1		28.7717	28.5606	NaN	NaN	28.453	28.7721	NaN	NaN
O14727;O14727-4;O14727-5;O14727-3;O14727-2	Apoptotic protease-activating factor 1	APAF1		29.1626	29.5371	29.3652	29.4424	29.0521	29.987	28.8754	28.7948
Q02410;Q02410-2	Amyloid beta A4 precursor protein-binding family A member 1	APBA1		27.632	27.6471	27.2794	27.526	26.9888	28.1504	26.3328	27.0009
O00213;O00213-2;O00213-4;O00213-6;O00213-3;O00213-5	Amyloid beta A4 precursor protein-binding family B member 1	APBB1		28.4065	28.3503	29.1618	28.2464	28.8812	27.7094	28.9477	27.6537
Q7Z5R6	Amyloid beta A4 precursor protein-binding family B member 1-interacting protein	APBB1IP		30.5084	30.0052	31.0688	30.9851	29.9088	29.3926	29.0527	28.6076
Q92870;Q92870-4;Q92870-2	Amyloid beta A4 precursor protein-binding family B member 2	APBB2		25.2546	25.6244	26.061	24.9874	25.612	25.5396	26.5692	25.9184
P25054;P25054-2	Adenomatous polyposis coli protein	APC		27.3935	27.2709	27.8442	27.4371	27.9936	28.2772	27.2449	27.002
Q8J025	Protein APCDD1	APCDD1		24.4983	NaN	25.0308	22.7756	27.4875	28.0707	25.3136	23.0372
P13798	Acylamino-acid-releasing enzyme	APEH		32.5198	32.6066	32.4631	32.7383	32.6831	32.8286	32.4245	32.4928
P27695	DNA-(apurinic or apyrimidinic site) lyase;DNA-(apurinic or apyrimidinic site) lyase, mitochondrial	APEX1		33.9321	33.5827	34.0398	33.9398	34.0023	33.5199	33.8876	33.6595
Q8WW43;Q8WW43-2	Gamma-secretase subunit APH-1B	APH1B		27.3944	26.8193	27.2274	26.0908	27.6623	25.9629	NaN	26.0556
Q9BZZ5-2	Apoptosis inhibitor 5	API5		31.8706	32.0725	31.9181	32.3016	31.7921	32.2849	32.4609	32.152
Q96GX9;Q96GX9-3	Methylthioribulose-1-phosphate dehydratase	APIP		28.8224	29.9615	29.3945	29.9421	29.8735	30.274	29.0974	29.2715
Q06481-3;Q06481-6;Q06481-5	Amyloid-like protein 2	APLP2		32.176	32.419	31.4859	31.3188	32.3714	31.8906	31.9236	31.9238
Q06481-4	Amyloid-like protein 2	APLP2		23.8033	23.8455	24.2095	22.5542	24.4411	26.2133	NaN	25.4926
Q9HDC9;Q9HDC9-2	Adipocyte plasma membrane-associated protein	APMAP		33.8585	33.1432	33.467	33.3196	33.5306	33.4495	33.1006	32.7045
Q8NCW5;Q8NCW5-2	NAD(P)H-hydrate epimerase	APOA1BP		30.6095	31.0716	30.7771	31.0993	31.1586	30.9688	31.3311	30.6296
P04114	Apolipoprotein B-100;Apolipoprotein B-48	APOB		31.3316	31.9485	30.7689	29.6519	29.7187	28.9919	31.3381	30.5698
Q9UH17;Q9UH17-3	DNA dC->dU-editing enzyme APOBEC-3B	APOBEC3B		25.4568	24.7115	26.8175	26.1831	26.3015	25.6738	25.7528	25.7589
Q9NRW3	DNA dC->dU-editing enzyme APOBEC-3C	APOBEC3C		30.2372	30.7843	30.4146	30.7173	30.3352	30.5705	29.0574	29.5813
Q8IUX4	DNA dC->dU-editing enzyme APOBEC-3F	APOBEC3F		25.54	24.1996	25.8427	NaN	26.8113	NaN	25.7952	NaN
P05090	Apolipoprotein D	APOD		27.3023	26.5139	25.8571	24.1489	26.5614	NaN	27.62	25.1914
Q9BQE5	Apolipoprotein L2	APOL2		31.6298	31.0979	31.7012	32.1438	31.2249	31.5887	31.9502	31.5356
O95236;O95236-2	Apolipoprotein L3	APOL3		25.0994	25.6998	26.1909	26.1663	24.7811	25.5908	26.8032	27.3249
Q9BUR5;Q9BUR5-2	Apolipoprotein O	APOO		29.6635	29.4297	29.5549	29.4223	29.8772	29.55	29.8163	29.4592
Q6UXV4	MICOS complex subunit MIC27	APOOL		31.0774	30.8381	30.9105	30.657	31.2184	31.039	31.4159	30.959
P05067;P05067-9;P05067-8;P05067-7;P05067-11;P05067-5;P05067-6;P05067-4;P05067-3;P05067-10	Amyloid beta A4 protein;N-APP;Soluble APP-alpha;Soluble APP-beta;C99;Beta-amyloid protein 42;Beta-amyloid protein 40;C83;P3(42);P3(40);C80;Gamma-secretase C-terminal fragment 59;Gamma-secretase C-terminal fragment 57;Gamma-secretase C-terminal fragment 50;C31	APP		31.8504	32.26	31.2546	31.8556	31.8133	32.1609	32.2973	32.4055
Q92624	Amyloid protein-binding protein 2	APPBP2		25.6203	25.7789	25.9022	26.0242	25.8321	25.1001	26.0469	26.4045
Q9UKG1	DCC-interacting protein 13-alpha	APPL1		32.0097	31.2619	31.8681	31.2295	31.8135	31.0946	31.29	31.0223
Q8NEU8;Q8NEU8-2;Q8NEU8-3	DCC-interacting protein 13-beta	APPL2		33.7819	33.9587	34.0401	34.489	33.7697	34.3441	33.1861	33.4102
P07741;P07741-2	Adenine phosphoribosyltransferase	APRT		32.0321	32.0107	31.1942	31.7416	31.899	31.7692	31.1946	31.5463
P29972;P29972-4;P29972-2;P29972-3	Aquaporin-1	AQP1		27.8165	27.5401	25.3003	NaN	25.3244	NaN	27.9715	29.6307
O60306	Intron-binding protein aquarius	AQR		29.7944	28.9035	30.0898	29.1652	30.0897	29.5084	30.1096	29.1774
P10398	Serine/threonine-protein kinase A-Raf	ARAF		29.2161	29.1712	29.5215	28.9727	29.7758	29.4641	29.6517	29.3988
Q96P48;Q96P48-3;Q96P48-4;Q96P48-1;Q96P48-7;Q96P48-2;Q96P48-5	Arf-GAP with Rho-GAP domain, ANK repeat and PH domain-containing protein 1	ARAP1		32.4838	31.7767	32.1318	31.658	32.3934	31.5585	32.0782	31.9089
P48444;P48444-2	Coatomer subunit delta	ARCN1		34.7446	34.8495	34.725	34.9228	34.9964	35.0444	34.8284	35.0259
P61204;P84077;P61204-2	ADP-ribosylation factor 3;ADP-ribosylation factor 1	ARF3;ARF1		34.5149	34.7451	34.3252	34.7463	34.4031	34.3044	34.5849	34.7569
P18085	ADP-ribosylation factor 4	ARF4		33.4497	33.9746	33.5936	33.9732	33.5514	33.9676	33.7207	34.5832
P84085	ADP-ribosylation factor 5	ARF5		31.2208	30.7481	30.9818	31.1145	31.5389	31.4286	31.1512	31.2681
P62330	ADP-ribosylation factor 6	ARF6		32.5949	32.9283	32.1152	32.9298	32.4583	33.044	32.6731	33.2453
Q8N6T3;Q8N6T3-5;Q8N6T3-2;Q8N6T3-4	ADP-ribosylation factor GTPase-activating protein 1	ARFGAP1		31.1782	31.4267	31.0651	31.5221	31.2724	31.424	31.1518	31.3291
Q8N6H7;Q8N6H7-2;Q8N6H7-3	ADP-ribosylation factor GTPase-activating protein 2	ARFGAP2		30.8346	30.7783	30.8274	30.794	30.6436	30.9197	30.5829	30.7625
Q9NP61;Q9NP61-2	ADP-ribosylation factor GTPase-activating protein 3	ARFGAP3		31.6259	31.8454	31.8851	32.0839	32.0406	31.9888	31.7671	32.1263
Q9Y6D6	Brefeldin A-inhibited guanine nucleotide-exchange protein 1	ARFGEF1		31.5866	31.3189	31.5869	31.3696	31.6558	31.5847	31.5436	31.2404
Q9Y6D5	Brefeldin A-inhibited guanine nucleotide-exchange protein 2	ARFGEF2		30.7102	30.7396	30.8397	30.8984	30.5566	30.8697	30.6687	30.7564
P53367;P53367-3	Arfaptin-1	ARFIP1		31.9907	31.7707	32.2452	31.651	32.3139	31.8527	32.4072	31.9613
P53365;P53365-3;P53365-2	Arfaptin-2	ARFIP2		30.722	29.8839	30.3424	29.8941	30.5456	29.9424	30.2421	29.8706
Q13795;Q13795-3;Q13795-2	ADP-ribosylation factor-related protein 1	ARFRP1		28.4689	27.2594	29.722	27.3021	28.8396	26.7243	29.9229	27.1313
Q9NWB6;Q9NWB6-2;Q9NWB6-3	Arginine and glutamate-rich protein 1	ARGLU1		28.2688	30.2045	28.2826	30.1665	28.0599	31.3001	27.523	30.7555
Q07960	Rho GTPase-activating protein 1	ARHGAP1		34.0367	34.3097	33.5979	34.3829	33.1394	34.0884	33.4974	34.3478
A1A4S6	Rho GTPase-activating protein 10	ARHGAP10		30.4042	30.707	30.0352	30.4452	29.7563	30.1112	29.9263	30.4748
Q8IWW6;Q8IWW6-2;Q8IWW6-4	Rho GTPase-activating protein 12	ARHGAP12		31.4255	30.8482	30.9501	30.3881	31.195	30.5495	30.5956	29.9708
Q68EM7;Q68EM7-6;Q68EM7-5;Q68EM7-2	Rho GTPase-activating protein 17	ARHGAP17		32.5602	32.5341	32.4779	32.5778	32.4609	32.784	32.4515	32.6445
Q8N392;Q8N392-2	Rho GTPase-activating protein 18	ARHGAP18		31.8553	31.2623	31.4508	31.0393	32.0949	32.0985	30.8457	30.5711
Q5T5U3;Q5T5U3-3	Rho GTPase-activating protein 21	ARHGAP21		29.5904	29.4906	29.3163	29.4361	29.1288	29.2119	28.8902	28.3767
Q7Z5H3;Q7Z5H3-5;Q7Z5H3-2;Q7Z5H3-3	Rho GTPase-activating protein 22	ARHGAP22		29.0668	29.0281	29.0943	28.0783	29.0036	28.7436	27.6279	28.2989
Q9P227;Q9P227-2	Rho GTPase-activating protein 23	ARHGAP23		27.7894	27.6333	27.7355	28.0089	27.4389	27.9272	27.9119	27.4778
Q8N264;Q8N264-3;Q8N264-2	Rho GTPase-activating protein 24	ARHGAP24		30.0766	29.1509	28.8453	27.3873	29.4657	28.9318	30.2079	28.91
Q9UNA1;Q9UNA1-2	Rho GTPase-activating protein 26	ARHGAP26		26.4294	25.2818	26.3727	26.2071	26.8105	25.8136	28.1194	27.4843
Q52LW3	Rho GTPase-activating protein 29	ARHGAP29		31.4783	31.1363	31.8082	31.2761	31.9878	31.6797	31.3068	30.1958
Q2M1Z3	Rho GTPase-activating protein 31	ARHGAP31		27.6287	27.3848	28.7726	28.2183	28.5433	28.2645	30.328	29.6879
Q9NRY4	Rho GTPase-activating protein 35	ARHGAP35		31.9082	32.289	32.3224	32.4911	31.9916	32.7776	31.8833	32.3213
Q9C0H5-2;Q9C0H5	Rho GTPase-activating protein 39	ARHGAP39		26.0429	26.6264	26.0364	26.2306	26.244	26.6043	27.3122	25.8135
Q13017;Q13017-2	Rho GTPase-activating protein 5	ARHGAP5		30.7157	30.5247	31.065	31.1663	30.7595	30.8924	30.6282	30.7819
P52565;P52565-2	Rho GDP-dissociation inhibitor 1	ARHGDIA		34.1026	34.5559	34.1549	34.7686	34.4685	35.0835	34.3534	34.7732
P52566	Rho GDP-dissociation inhibitor 2	ARHGDIB		26.6143	26.0917	30.0545	29.852	28.0433	28.5683	25.7814	NaN
Q92888-3;Q92888;Q92888-2;Q92888-4	Rho guanine nucleotide exchange factor 1	ARHGEF1		31.6124	31.773	31.822	31.6129	31.7033	31.6391	31.7686	31.7793
O15013;O15013-4;O15013-5;O15013-6;O15013-7	Rho guanine nucleotide exchange factor 10	ARHGEF10		31.5915	32.0344	31.0273	31.6233	31.4769	32.0985	31.0471	31.3559
Q9HCE6;Q9HCE6-3;Q9HCE6-2;Q9HCE6-5;Q9HCE6-4	Rho guanine nucleotide exchange factor 10-like protein	ARHGEF10L		28.2479	28.4184	28.8651	28.128	29.0118	28.0274	27.7145	27.0133
O15085-2	Rho guanine nucleotide exchange factor 11	ARHGEF11		29.4851	29.4662	29.3957	29.5303	29.5368	29.7145	29.5358	29.4432
O15085	Rho guanine nucleotide exchange factor 11	ARHGEF11		26.1019	24.3408	26.4062	NaN	25.1067	24.2237	NaN	24.7557
Q9NZN5	Rho guanine nucleotide exchange factor 12	ARHGEF12		31.8932	31.3913	31.7326	31.0063	31.6733	31.665	31.563	31.226
Q9NZN5-2	Rho guanine nucleotide exchange factor 12	ARHGEF12		26.2706	NaN	24.9227	25.912	24.0047	25.6697	24.8169	NaN
Q96PE2	Rho guanine nucleotide exchange factor 17	ARHGEF17		32.0447	30.8102	32.3161	31.0285	32.321	31.1986	32.6058	31.543
Q6ZSZ5;Q6ZSZ5-2	Rho guanine nucleotide exchange factor 18	ARHGEF18		29.6953	30.1554	30.0512	30.692	29.7725	30.9235	29.8733	30.5484
Q92974;Q92974-2;Q92974-3	Rho guanine nucleotide exchange factor 2	ARHGEF2		31.8221	32.2074	32.181	32.8271	32.2694	32.467	32.9594	33.33
Q8N1W1;Q8N1W1-4;Q8N1W1-3;Q8N1W1-6;Q8N1W1-5	Rho guanine nucleotide exchange factor 28	ARHGEF28		27.105	25.0041	28.0362	25.3515	26.851	26.3524	27.3733	25.7742
Q8TER5;Q8TER5-4;Q8TER5-3;Q8TER5-2	Rho guanine nucleotide exchange factor 40	ARHGEF40		30.2414	29.7902	30.3126	29.9492	30.3778	30.2847	30.0242	30.0501
Q12774;Q12774-2	Rho guanine nucleotide exchange factor 5	ARHGEF5		24.8119	25.3537	25.2161	25.7019	25.2471	25.0333	24.332	25.01
Q15052-2	Rho guanine nucleotide exchange factor 6	ARHGEF6		29.6508	29.5803	28.8697	28.9287	29.661	30.2505	28.9012	29.2796
Q14155-1;Q14155-5	Rho guanine nucleotide exchange factor 7	ARHGEF7		31.7922	31.3014	31.7094	31.5237	31.6266	31.1189	31.7983	32.08
O14497;O14497-2;O14497-3	AT-rich interactive domain-containing protein 1A	ARID1A		29.2411	29.7788	29.6226	29.8714	29.4462	29.9517	29.6579	29.9156
Q8NFD5;Q8NFD5-3;Q8NFD5-2;Q8NFD5-4	AT-rich interactive domain-containing protein 1B	ARID1B		29.0764	28.4455	28.8051	28.6173	29.0356	28.1311	29.0092	28.4989
Q68CP9;Q68CP9-3	AT-rich interactive domain-containing protein 2	ARID2		25.6033	27.5289	27.0437	27.617	26.8043	26.83	27.059	27.4312
P29374;P29374-3;P29374-2	AT-rich interactive domain-containing protein 4A	ARID4A		26.3134	26.1449	26.2246	26.646	26.4779	25.6834	26.4855	26.1883
Q4LE39;Q4LE39-2;Q4LE39-3;Q4LE39-4	AT-rich interactive domain-containing protein 4B	ARID4B		26.6716	27.5851	26.5133	27.3133	27.5968	27.8833	27.3609	27.2714
Q14865;Q14865-2	AT-rich interactive domain-containing protein 5B	ARID5B		28.9417	28.1198	28.6726	27.767	28.2147	27.3309	27.7897	27.6293
Q9Y4X5	E3 ubiquitin-protein ligase ARIH1	ARIH1		31.2536	30.9885	31.0804	31.1538	31.1799	31.4875	31.1174	31.2262
O95376	E3 ubiquitin-protein ligase ARIH2	ARIH2		29.5511	29.1278	29.6939	29.1811	29.7121	29.4303	29.4925	29.1658
P40616;P40616-2	ADP-ribosylation factor-like protein 1	ARL1		31.0503	31.9851	31.142	32.1266	31.7641	31.175	31.6608	32.0439
Q3SXY8;Q3SXY8-2;Q3SXY8-3	ADP-ribosylation factor-like protein 13B	ARL13B		23.6156	23.9743	24.4482	23.6319	24.3701	24.1763	25.119	23.7695
Q8N8R7	ARL14 effector protein	ARL14EP		26.2677	27.4406	27.3104	25.6562	27.6446	26.8777	28.0201	26.071
Q9NXU5	ADP-ribosylation factor-like protein 15	ARL15		28.7988	28.4743	28.1955	28.6504	28.3889	27.978	28.6508	28.3217
P36404;P36404-2	ADP-ribosylation factor-like protein 2	ARL2		30.6051	29.8814	30.8247	30.2237	30.6586	29.8416	30.2361	29.8918
Q9Y2Y0;Q9Y2Y0-2	ADP-ribosylation factor-like protein 2-binding protein	ARL2BP		29.3477	29.6856	28.5684	28.8096	28.9278	29.7786	28.1271	28.7244
P36405	ADP-ribosylation factor-like protein 3	ARL3		31.6785	31.8764	31.6117	31.6789	31.4413	31.67	31.3267	31.6224
P56559;P56559-2	ADP-ribosylation factor-like protein 4C	ARL4C		26.6791	27.8222	27.0324	27.7487	27.5956	27.7039	28.1267	27.5273
Q9Y689;Q9Y689-2	ADP-ribosylation factor-like protein 5A	ARL5A		25.8074	25.5783	26.4059	26.2522	26.3792	25.9749	NaN	25.5945
Q9H0F7;Q9H0F7-2	ADP-ribosylation factor-like protein 6	ARL6		27.5528	29.5819	28.0499	29.073	28.1821	29.332	28.5861	27.4672
Q15041;Q15041-3;Q15041-2	ADP-ribosylation factor-like protein 6-interacting protein 1	ARL6IP1		29.9826	31.5292	30.4085	31.8218	30.1615	32.3805	30.3347	31.785
Q66PJ3;Q66PJ3-7;Q66PJ3-3;Q66PJ3-4	ADP-ribosylation factor-like protein 6-interacting protein 4	ARL6IP4		29.2364	29.4686	29.525	29.3612	29.7707	29.7426	29.1691	29.7582
O75915	PRA1 family protein 3	ARL6IP5		33.3302	33.8194	33.1849	33.6686	33.2604	33.4245	32.6542	33.0754
Q8N6S5	ADP-ribosylation factor-like protein 6-interacting protein 6	ARL6IP6		26.5727	28.3148	26.4897	27.9163	26.0604	27.9162	26.3166	27.0587
Q96BM9	ADP-ribosylation factor-like protein 8A	ARL8A		29.6817	30.9276	29.5036	30.9193	29.3305	30.6244	29.9559	30.9974
Q9NVJ2	ADP-ribosylation factor-like protein 8B	ARL8B		32.7312	32.7672	32.2397	32.1323	32.5366	31.8174	33.0362	32.6586
Q9NVT9	Armadillo repeat-containing protein 1	ARMC1		29.1377	27.9682	29.2795	29.1139	29.1852	28.7769	29.0191	28.3036
Q8N2F6-2;Q8N2F6-4;Q8N2F6;Q8N2F6-6;Q8N2F6-3;Q8N2F6-5	Armadillo repeat-containing protein 10	ARMC10		29.5084	29.8482	29.5754	30.0772	29.2822	29.9207	29.2834	29.6552
Q96C12;Q96C12-2	Armadillo repeat-containing protein 5	ARMC5		30.4448	26.6253	26.8413	25.0961	25.9438	25.218	NaN	27.2064
Q6NXE6;Q6NXE6-2	Armadillo repeat-containing protein 6	ARMC6		28.0781	28.9038	28.2211	28.8621	28.1005	29.0571	28.6973	29.073
Q8IUR7;Q8IUR7-7;Q8IUR7-2;Q8IUR7-3;Q8IUR7-8;Q8IUR7-6	Armadillo repeat-containing protein 8	ARMC8		29.0489	29.2809	29.3729	28.7706	29.2964	29.2242	29.5024	28.6898
Q7Z3E5;Q7Z3E5-2	LisH domain-containing protein ARMC9	ARMC9		30.2545	29.7685	31.0712	29.9825	31.621	31.3204	31.1242	30.5272
Q9P291	Armadillo repeat-containing X-linked protein 1	ARMCX1		30.9429	30.7122	30.9877	30.7424	30.792	30.5167	30.6981	30.434
Q7L311	Armadillo repeat-containing X-linked protein 2	ARMCX2		31.1877	30.8608	31.3342	30.8162	30.5099	30.5712	31.2591	30.1418
Q9UH62	Armadillo repeat-containing X-linked protein 3	ARMCX3		31.5041	31.4396	31.2768	31.2035	31.2517	31.2363	31.2574	31.7399
Q7L4S7	Protein ARMCX6	ARMCX6		25.4312	26.6574	25.7582	26.8999	25.4404	26.6812	25.2594	26.2711
Q9H993	Protein-glutamate O-methyltransferase	ARMT1		30.214	30.2188	30.1504	30.2654	30.2456	30.1492	30.031	30.2731
P27540-2;P27540;P27540-4;P27540-3	Aryl hydrocarbon receptor nuclear translocator	ARNT		27.4541	28.4363	27.6697	28.5791	28.0437	28.4006	27.7321	27.8394
Q9HBZ2;Q9HBZ2-2	Aryl hydrocarbon receptor nuclear translocator 2	ARNT2		26.105	26.0449	27.0298	26.4057	27.6263	26.6955	27.2017	26.1957
Q92747;Q92747-2	Actin-related protein 2/3 complex subunit 1A	ARPC1A		33.0143	33.6918	32.4709	33.7937	32.4719	33.5593	32.8634	34.0397
O15143	Actin-related protein 2/3 complex subunit 1B	ARPC1B		34.8354	35.1222	34.8203	35.5989	34.9263	35.4447	35.0811	35.2602
O15144	Actin-related protein 2/3 complex subunit 2	ARPC2		35.0713	34.9834	35.3885	35.3403	35.3314	34.9153	35.1985	35.2382
O15145	Actin-related protein 2/3 complex subunit 3	ARPC3		32.961	32.6294	32.8758	33.5524	32.4299	33.7268	32.4676	33.4661
P59998;P59998-3;P59998-4	Actin-related protein 2/3 complex subunit 4	ARPC4		34.4576	34.5987	34.3998	34.7782	34.3255	34.4728	34.3402	34.7291
O15511;O15511-2	Actin-related protein 2/3 complex subunit 5	ARPC5		34.0841	33.9506	34.1194	34.2921	34.0042	33.8978	34.3001	33.7438
Q9BPX5	Actin-related protein 2/3 complex subunit 5-like protein	ARPC5L		31.5572	31.2317	31.4611	31.0007	31.5793	31.4718	31.5523	31.0791
Q7Z6K5-2;Q7Z6K5	Arpin	ARPIN		29.5928	29.9463	29.6837	29.5663	29.8574	30.3654	29.5999	30.0856
P56211;P56211-2	cAMP-regulated phosphoprotein 19	ARPP19		29.2578	30.1309	29.4539	29.9636	29.1478	30.0333	28.5796	30.2841
P49407-2;P49407	Beta-arrestin-1	ARRB1		28.0773	27.661	27.5103	27.7677	27.5587	28.0334	27.1012	27.4284
Q8N5I2	Arrestin domain-containing protein 1	ARRDC1		25.2574	25.8694	25.8425	25.8099	NaN	26.474	26.0525	26.4607
P15289;P15289-2	Arylsulfatase A;Arylsulfatase A component B;Arylsulfatase A component C	ARSA	1	32.8409	32.3413	32.1676	31.7498	33.2818	32.5657	32.3468	32.4092
P15848;P15848-2	Arylsulfatase B	ARSB	1	31.7668	31.9138	32.1338	32.5897	31.5345	32.005	32.4952	32.7511
O00192;O00192-2	Armadillo repeat protein deleted in velo-cardio-facial syndrome	ARVCF		27.0407	26.3146	25.2954	24.6431	25.5884	NaN	25.7167	NaN
Q9HBK9;Q9HBK9-2	Arsenite methyltransferase	AS3MT		27.2104	26.7367	28.7778	27.8195	26.4422	25.5513	26.4137	24.2289
Q13510;Q13510-2;Q13510-3	Acid ceramidase;Acid ceramidase subunit alpha;Acid ceramidase subunit beta	ASAH1	1	31.8803	32.0048	31.2212	32.0408	31.3661	31.7856	32.1219	31.8797
Q9ULH1;Q9ULH1-2	Arf-GAP with SH3 domain, ANK repeat and PH domain-containing protein 1	ASAP1		31.9177	31.5745	31.6229	31.6967	31.7868	31.8144	31.2737	31.403
O43150	Arf-GAP with SH3 domain, ANK repeat and PH domain-containing protein 2	ASAP2		31.5592	31.4304	31.2726	31.0447	31.1774	31.3098	30.8238	30.6676
O43150-2	Arf-GAP with SH3 domain, ANK repeat and PH domain-containing protein 2	ASAP2		NaN	27.3704	NaN	25.7966	NaN	26.1391	25.5452	25.0745
Q8TDY4;Q8TDY4-3	Arf-GAP with SH3 domain, ANK repeat and PH domain-containing protein 3	ASAP3		29.6807	28.4043	29.3446	28.4539	28.9759	28.0003	28.358	27.3305
Q9Y576	Ankyrin repeat and SOCS box protein 1	ASB1		28.1325	28.1816	28.5512	28.132	27.978	27.9046	27.8935	27.6501
Q9NWX5	Ankyrin repeat and SOCS box protein 6	ASB6		27.035	26.1981	27.7404	26.7268	27.3267	26.3958	27.295	26.2691
Q8N9N2-2;Q8N9N2	Activating signal cointegrator 1 complex subunit 1	ASCC1		29.9676	29.6051	29.7765	29.9234	29.8182	29.3589	29.5204	29.5628
Q9H1I8;Q9H1I8-3	Activating signal cointegrator 1 complex subunit 2	ASCC2		30.1346	30.0363	30.6244	29.9713	30.055	29.6313	29.9214	29.7015
Q8N3C0	Activating signal cointegrator 1 complex subunit 3	ASCC3		32.4524	32.4724	32.5921	32.7021	32.5311	32.3538	32.4131	32.3938
Q9Y294	Histone chaperone ASF1A	ASF1A		28.8372	28.5248	28.7364	28.336	29.1999	28.2119	28.17	28.4588
Q9UBL3;Q9UBL3-3;Q9UBL3-2	Set1/Ash2 histone methyltransferase complex subunit ASH2	ASH2L		29.7217	29.1917	30.3678	29.697	29.8984	29.3123	30.2752	30.0471
P04424;P04424-2	Argininosuccinate lyase	ASL		33.2283	33.3211	32.3878	32.567	32.6726	32.7308	31.6177	31.6194
O95671;O95671-2;O95671-3	N-acetylserotonin O-methyltransferase-like protein	ASMTL		30.8315	31.0581	31.0449	31.1878	30.9562	31.0762	29.4809	29.3517
O43681	ATPase ASNA1	ASNA1		33.2611	33.0414	33.1596	33.3523	32.8781	32.8889	33.0218	32.7816
P08243;P08243-2;P08243-3	Asparagine synthetase [glutamine-hydrolyzing]	ASNS		31.4548	32.0308	31.7423	32.5611	31.4893	31.8618	33.0063	33.0058
P45381	Aspartoacylase	ASPA		28.328	27.668	27.3831	27.3684	28.0787	27.3431	26.2698	24.7887
Q12797;Q12797-10	Aspartyl/asparaginyl beta-hydroxylase	ASPH		34.3518	34.4854	34.4325	34.326	34.3137	34.2422	33.55	33.7367
Q9BZE9;Q9BZE9-2;Q9BZE9-3	Tether containing UBX domain for GLUT4	ASPSCR1		30.1727	30.2325	29.9516	30.5529	30.0742	30.5085	29.9521	30.1377
P00966	Argininosuccinate synthase	ASS1		32.8482	33.1211	32.2272	33.0975	33.6834	34.231	31.8489	32.8477
Q9NVM9;Q9NVM9-2	Protein asunder homolog	ASUN		29.3186	29.364	29.5587	29.717	29.5822	29.76	30.2307	30.0208
Q76L83;Q76L83-2	Putative Polycomb group protein ASXL2	ASXL2		24.7565	24.5803	25.7686	NaN	25.4395	NaN	24.978	NaN
Q8NBU5;Q8NBU5-2	ATPase family AAA domain-containing protein 1	ATAD1		30.421	31.033	31.4165	31.2481	31.0554	31.4745	31.3828	31.5329
Q9NVI7-2;Q9NVI7;Q9NVI7-3	ATPase family AAA domain-containing protein 3A	ATAD3A		32.759	32.6586	32.5254	32.2118	32.4375	32.6377	32.2755	32.3557
Q5T9A4;Q5T9A4-3	ATPase family AAA domain-containing protein 3B	ATAD3B		28.0072	26.8368	27.9172	27.3265	27.5726	27.7866	28.1266	27.1563
O95260-2;O95260	Arginyl-tRNA--protein transferase 1	ATE1		29.948	30.3765	29.9313	29.7235	30.7537	30.2122	30.0987	29.4424
P18846;P18846-2;Q03060-8;Q03060-6;Q03060-23;Q03060-9;Q03060-24;Q03060-32;Q03060-26;Q03060-21;Q03060-31	Cyclic AMP-dependent transcription factor ATF-1	ATF1		25.786	26.683	25.9943	27.1186	26.4343	27.4262	27.3305	26.2842
P15336;P15336-5;P15336-4;P15336-3;P15336-7;P15336-2	Cyclic AMP-dependent transcription factor ATF-2	ATF2		26.976	27.2399	27.3891	26.5005	27.7758	27.5997	27.8518	27.74
P17544-2;P17544-6;P17544-4;P17544;P17544-3	Cyclic AMP-dependent transcription factor ATF-7	ATF7		26.2889	28.1294	26.0897	28.2449	26.1547	28.5975	26.8491	27.782
Q6VMQ6;Q6VMQ6-4;Q6VMQ6-5;Q6VMQ6-2	Activating transcription factor 7-interacting protein 1	ATF7IP		28.1941	25.9117	28.5909	27.0144	28.3839	24.9954	28.4354	25.0338
Q9BSB4	Autophagy-related protein 101	ATG101		27.375	27.0686	26.9993	27.7881	26.8299	27.4809	27.3705	27.5278
O75143;O75143-2;O75143-5;O75143-3;O75143-4	Autophagy-related protein 13	ATG13		27.062	26.6155	26.5985	26.5009	26.3929	26.2584	26.5609	26.1259
Q676U5;Q676U5-2;Q676U5-5;Q676U5-3;Q676U5-4	Autophagy-related protein 16-1	ATG16L1		30.8077	31.0378	31.2713	31.178	30.8342	30.9387	30.9541	30.8477
Q2TAZ0;Q2TAZ0-3	Autophagy-related protein 2 homolog A	ATG2A		28.3361	27.6472	28.8791	27.7904	28.759	26.6217	28.8233	27.1706
Q96BY7	Autophagy-related protein 2 homolog B	ATG2B		30.4203	30.0235	30.3566	29.9717	30.4288	29.962	30.367	29.2913
Q9NT62;Q9NT62-2	Ubiquitin-like-conjugating enzyme ATG3	ATG3		32.1983	31.2163	32.07	31.1405	32.3708	30.5299	31.7241	30.684
Q9Y4P1;Q9Y4P1-6;Q9Y4P1-2;Q9Y4P1-4	Cysteine protease ATG4B	ATG4B		29.1758	29.0174	29.1703	28.8001	29.071	28.8993	29.1845	28.986
Q96DT6	Cysteine protease ATG4C	ATG4C		25.9086	24.6108	26.0892	NaN	25.2065	NaN	25.6581	25.3677
Q9H1Y0;Q9H1Y0-2	Autophagy protein 5	ATG5		30.1751	29.2032	30.374	28.3738	30.7111	29.2869	30.304	28.7464
O95352;O95352-2;O95352-3	Ubiquitin-like modifier-activating enzyme ATG7	ATG7		30.812	30.386	30.8723	30.8116	31.2033	31.0998	30.5751	30.6021
Q7Z3C6;Q7Z3C6-2	Autophagy-related protein 9A	ATG9A		27.9291	27.8916	29.1619	28.6237	28.8105	29.233	29.362	28.833
Q32M88	Acid trehalase-like protein 1	ATHL1		26.0764	26.5291	26.806	26.4773	27.1337	26.6505	26.9967	26.6744
P31939;P31939-2	Bifunctional purine biosynthesis protein PURH;Phosphoribosylaminoimidazolecarboxamide formyltransferase;IMP cyclohydrolase	ATIC		33.9896	34.5802	34.3221	34.7801	33.9622	34.2527	33.8431	34.3042
Q8WXF7-2;Q8WXF7	Atlastin-1	ATL1		30.2475	30.627	30.6618	30.8169	30.035	30.2316	30.1533	30.6508
Q8NHH9;Q8NHH9-5;Q8NHH9-2;Q8NHH9-4;Q8NHH9-3	Atlastin-2	ATL2		29.4145	29.2364	30.0127	28.6875	29.5804	29.0471	30.0559	29.293
Q6DD88	Atlastin-3	ATL3		35.2305	35.2943	35.2043	35.4167	35.3582	35.2346	35.0544	35.0845
Q13315	Serine-protein kinase ATM	ATM		28.4482	26.9725	29.5187	28.663	28.2242	26.6788	29.1812	27.8345
P54259	Atrophin-1	ATN1		27.5003	26.7226	27.6385	26.944	26.9764	27.1466	27.4213	27.3162
O00244	Copper transport protein ATOX1	ATOX1		33.4164	33.1472	33.3378	33.6255	33.5578	33.9215	32.7539	32.6887
O60312	Probable phospholipid-transporting ATPase VA	ATP10A		22.471	22.2436	24.4598	23.7349	NaN	22.587	26.3223	27.3018
P98196	Probable phospholipid-transporting ATPase IH	ATP11A		28.7136	27.8713	28.3477	26.7812	28.8119	26.8175	28.2633	26.6794
Q9Y2G3	Probable phospholipid-transporting ATPase IF	ATP11B		28.4125	28.0704	28.3976	27.953	28.5286	27.4822	28.5427	28.922
Q8NB49-3;Q8NB49;Q8NB49-2;Q8NB49-4	Phospholipid-transporting ATPase IG	ATP11C		31.0982	30.6299	31.1383	31.3587	31.0994	31.2438	30.7876	31.1368
Q9HD20;Q9HD20-2	Manganese-transporting ATPase 13A1	ATP13A1		32.5492	32.5593	32.6492	32.3654	32.7001	32.6379	32.8788	32.841
Q9H7F0;Q9H7F0-2	Probable cation-transporting ATPase 13A3	ATP13A3		30.175	30.7485	29.9913	30.4594	30.2577	30.7087	30.6447	30.7143
P05023;P05023-4;P05023-3;P05023-2	Sodium/potassium-transporting ATPase subunit alpha-1	ATP1A1		34.9337	34.8048	34.8121	34.7769	34.8175	34.7407	34.4502	34.4008
P50993	Sodium/potassium-transporting ATPase subunit alpha-2	ATP1A2		25.4255	25.6777	25.6342	25.3616	25.6957	25.8646	26.1049	26.1599
P05026;P05026-2	Sodium/potassium-transporting ATPase subunit beta-1	ATP1B1		28.6119	29.0494	28.7833	28.9929	28.885	29.075	29.0316	29.4976
P54709;P54709-2	Sodium/potassium-transporting ATPase subunit beta-3	ATP1B3		33.3027	32.8099	32.8886	32.5668	32.9959	32.5639	32.6461	32.2525
P16615;P16615-4;P16615-5;P16615-2;P16615-3	Sarcoplasmic/endoplasmic reticulum calcium ATPase 2	ATP2A2		35.3387	35.1761	35.4382	35.3325	35.6368	35.4051	35.928	36.0105
P20020;P20020-6;P20020-3;P20020-4;P20020-5;P20020-2	Plasma membrane calcium-transporting ATPase 1	ATP2B1		32.8881	32.3782	32.8685	32.5685	32.7328	32.359	32.9483	32.2613
P23634;P23634-6;P23634-7;P23634-8	Plasma membrane calcium-transporting ATPase 4	ATP2B4		36.031	36.1064	35.5767	35.5387	35.6577	35.8014	35.0402	35.1415
P23634-2;P23634-4;P23634-5;P23634-3	Plasma membrane calcium-transporting ATPase 4	ATP2B4		26.4909	24.3477	24.7043	NaN	23.4825	25.3491	25.0795	NaN
P98194-5;P98194-9;P98194-6;P98194-7;P98194-8	Calcium-transporting ATPase type 2C member 1	ATP2C1		31.7749	32.0142	31.8088	31.6147	31.9048	32.0727	31.5677	31.447
P98194;P98194-2	Calcium-transporting ATPase type 2C member 1	ATP2C1		26.4395	26.6258	25.4575	NaN	26.0068	26.9893	26.4535	NaN
P25705;P25705-3	ATP synthase subunit alpha, mitochondrial	ATP5A1		36.4664	36.0698	36.3605	36.234	36.204	36.3275	36.2378	36.4427
P06576	ATP synthase subunit beta, mitochondrial	ATP5B		36.5588	36.1802	36.4736	36.1229	36.3463	36.1605	36.2873	36.5023
P36542-2	ATP synthase subunit gamma, mitochondrial	ATP5C1		32.5257	32.8061	32.1683	32.7439	32.5497	32.4081	32.0947	32.6858
P36542	ATP synthase subunit gamma, mitochondrial	ATP5C1		25.0832	26.4533	25.463	27.147	25.2994	26.9342	25.1332	26.6637
P30049	ATP synthase subunit delta, mitochondrial	ATP5D		31.1791	30.6609	31.5075	32.286	31.1032	31.962	30.9883	30.5736
P56381;Q5VTU8	ATP synthase subunit epsilon, mitochondrial;ATP synthase subunit epsilon-like protein, mitochondrial	ATP5E;ATP5EP2		29.8828	30.1893	29.74	31.3783	29.8015	30.1826	29.6618	30.1446
P24539	ATP synthase F(0) complex subunit B1, mitochondrial	ATP5F1		33.4087	33.8215	32.9488	33.6876	32.7363	34.0481	33.9242	33.8529
O75947;O75947-2	ATP synthase subunit d, mitochondrial	ATP5H		34.7583	33.4767	34.471	33.4335	34.5374	33.5633	34.1409	33.8013
P56385	ATP synthase subunit e, mitochondrial	ATP5I		31.9637	31.5729	32.1367	31.2913	32.0803	31.6705	32.5276	31.3288
P18859;P18859-2	ATP synthase-coupling factor 6, mitochondrial	ATP5J		30.5217	31.421	30.7142	31.319	30.9497	31.714	31.3263	31.1175
P56134;P56134-3	ATP synthase subunit f, mitochondrial	ATP5J2		29.8241	29.1291	29.499	28.7069	29.3391	27.7583	28.9569	28.1188
O75964	ATP synthase subunit g, mitochondrial	ATP5L		31.9643	30.9892	32.0706	32.8615	31.5085	32.4992	31.3626	31.688
P48047	ATP synthase subunit O, mitochondrial	ATP5O		32.9548	32.2107	32.8165	32.4789	32.694	32.2707	32.7117	32.4586
Q99766	ATP synthase subunit s, mitochondrial	ATP5S		26.9534	25.9867	26.2648	25.5472	26.0061	26.5086	26.0312	26.2451
Q9NW81;Q9NW81-4;Q9NW81-5	ATP synthase subunit s-like protein	ATP5SL		26.5567	25.6121	24.8142	26.4421	25.5188	25.9154	25.7374	25.9477
Q15904	V-type proton ATPase subunit S1	ATP6AP1		29.3732	30.4081	29.1028	30.3798	29.2556	30.5434	29.2643	30.718
O75787;O75787-2	Renin receptor	ATP6AP2		29.7263	30.1059	29.5108	29.7444	30.0903	29.2785	30.0444	29.8383
Q93050-3;Q93050;Q93050-1	V-type proton ATPase 116 kDa subunit a isoform 1	ATP6V0A1		31.6429	31.3821	31.7668	30.9535	31.3779	31.1737	32.0474	31.4624
Q9Y487	V-type proton ATPase 116 kDa subunit a isoform 2	ATP6V0A2		28.1199	27.0582	28.448	27.3709	28.4636	27.5894	28.9352	27.94
P27449	V-type proton ATPase 16 kDa proteolipid subunit	ATP6V0C		31.5733	30.3132	31.6416	30.2958	31.538	29.6955	31.1952	31.2787
P61421	V-type proton ATPase subunit d 1	ATP6V0D1		32.6297	32.9337	32.8646	32.8421	32.7626	32.6337	32.9264	33.5312
Q8N8Y2	V-type proton ATPase subunit d 2	ATP6V0D2		24.8855	24.9212	25.1037	24.4706	26.6176	NaN	25.777	25.1015
P38606;P38606-2	V-type proton ATPase catalytic subunit A	ATP6V1A		33.4248	33.5742	33.3038	33.7594	33.3754	33.7435	33.7203	33.7293
P21281	V-type proton ATPase subunit B, brain isoform	ATP6V1B2		33.8529	33.6922	33.9501	33.732	33.9831	33.9262	33.9863	34.1759
P21283	V-type proton ATPase subunit C 1	ATP6V1C1		32.2116	32.2877	31.9957	32.2188	31.9399	32.1491	31.797	31.8881
Q9Y5K8	V-type proton ATPase subunit D	ATP6V1D		30.5769	30.9638	30.4865	31.3259	30.7965	31.0764	31.6745	31.9615
P36543;P36543-3;P36543-2	V-type proton ATPase subunit E 1	ATP6V1E1		32.7209	33.0986	32.6198	33.1655	32.2566	33.3016	32.6223	33.5565
Q16864;Q16864-2	V-type proton ATPase subunit F	ATP6V1F		30.0394	29.5638	29.8082	29.5505	29.8622	29.3899	29.7248	29.5424
O75348	V-type proton ATPase subunit G 1	ATP6V1G1		28.4237	30.6679	31.4719	30.8878	31.098	30.6251	31.6035	30.8059
Q9UI12;Q9UI12-2	V-type proton ATPase subunit H	ATP6V1H		31.5729	31.2893	32.0511	31.3547	31.5615	31.5632	31.9297	31.6834
Q04656;Q04656-5;Q04656-2;Q04656-3	Copper-transporting ATPase 1	ATP7A		28.6732	27.4612	28.3917	27.6679	27.5413	27.4893	28.136	28.1459
O43520	Phospholipid-transporting ATPase IC	ATP8B1		30.0461	29.9494	29.419	28.5705	28.8365	28.8866	29.0837	28.7687
P98198;P98198-3	Phospholipid-transporting ATPase ID	ATP8B2		28.7186	28.0501	28.5348	27.7853	29.1436	27.9166	28.5452	27.9539
O75110;O75110-2	Probable phospholipid-transporting ATPase IIA	ATP9A		30.4887	30.4035	30.2679	29.6675	30.3755	30.3858	30.0056	29.7152
O43861;O43861-2	Probable phospholipid-transporting ATPase IIB	ATP9B		27.5013	26.8592	27.7899	27.1375	27.7166	27.0037	27.8541	26.9902
Q5TC12-3;Q5TC12;Q5TC12-2	ATP synthase mitochondrial F1 complex assembly factor 1	ATPAF1		32.9569	32.3054	32.6372	32.6984	32.9256	31.253	33.0393	31.7143
Q8N5M1	ATP synthase mitochondrial F1 complex assembly factor 2	ATPAF2		30.1443	29.2708	29.6454	28.9109	30.2414	28.9261	29.5936	28.6792
Q9UII2;Q9UII2-3;Q9UII2-2	ATPase inhibitor, mitochondrial	ATPIF1		26.2963	32.3907	27.9913	31.3645	26.5895	32.1466	26.5514	31.3776
O75882;O75882-2;O75882-3	Attractin	ATRN		28.5075	30.0347	28.9363	28.7403	28.1549	29.0171	28.2117	29.028
P46100;P46100-4;P46100-3;P46100-5;P46100-2	Transcriptional regulator ATRX	ATRX		30.3933	29.6576	30.4974	29.792	30.7016	29.6556	30.4932	29.5274
P54253	Ataxin-1	ATXN1		27.9768	27.4216	26.9659	27.3335	27.6451	27.1725	27.5293	28.4245
Q9UBB4;Q9UBB4-2	Ataxin-10	ATXN10		30.6716	30.5974	31.1213	30.6394	31.119	30.9056	30.2028	30.6241
Q99700;Q99700-4;Q99700-2;Q99700-5	Ataxin-2	ATXN2		32.4639	32.0193	32.2897	32.1125	32.3169	31.7723	32.3867	32.0509
Q8WWM7;Q8WWM7-6;Q8WWM7-8;Q8WWM7-5;Q8WWM7-4;Q8WWM7-9;Q8WWM7-2;Q8WWM7-3;Q8WWM7-7	Ataxin-2-like protein	ATXN2L		32.0168	31.9786	32.0931	32.1349	31.9363	31.8654	31.9968	32.1485
P54252;P54252-2;P54252-4;P54252-3	Ataxin-3	ATXN3		29.1907	29.6102	29.0998	29.1707	29.0883	29.4195	28.5524	29.056
Q96GX2	Putative ataxin-7-like protein 3B	ATXN7L3B		25.909	27.3763	25.8099	27.3614	26.1182	26.9289	25.5465	26.3708
Q13825;Q13825-2	Methylglutaconyl-CoA hydratase, mitochondrial	AUH		26.7584	26.8985	26.2343	26.3369	26.3268	25.7687	26.5647	25.4974
Q9Y679;Q9Y679-2;Q9Y679-3	Ancient ubiquitous protein 1	AUP1		27.9891	27.4401	28.8069	29.104	28.8313	28.894	29.3087	28.6348
Q9NWT8	Aurora kinase A-interacting protein	AURKAIP1		NaN	25.6336	NaN	25.674	24.036	25.8146	24.3799	26.4068
Q9NQS1	Cell death regulator Aven	AVEN		27.6724	28.1831	28.3521	28.0444	27.6441	28.0669	28.4515	28.6564
Q8NBF6;Q8NBF6-2	Late secretory pathway protein AVL9 homolog	AVL9		28.2864	27.9977	28.6347	28.3186	28.8304	28.3754	28.8997	28.7987
P30530;P30530-2	Tyrosine-protein kinase receptor UFO	AXL		29.7873	29.941	30.379	30.0515	29.7839	29.8177	30.3687	30.154
Q9H6S1;Q9H6S1-3;Q9H6S1-5;Q9H6S1-4	5-azacytidine-induced protein 2	AZI2		27.6661	27.6872	27.7075	27.5144	28.0282	27.5716	27.9969	27.8626
P61769	Beta-2-microglobulin;Beta-2-microglobulin form pI 5.3	B2M		32.5008	33.9742	33.0152	34.2773	32.7794	34.3819	31.7985	33.4411
O43825	Beta-1,3-galactosyltransferase 2	B3GALT2		NaN	NaN	NaN	22.8261	NaN	NaN	24.6046	25.1655
Q96L58	Beta-1,3-galactosyltransferase 6	B3GALT6		26.2817	26.3808	26.0256	25.3538	25.6112	24.4125	25.7528	26.5219
Q6Y288	Beta-1,3-glucosyltransferase	B3GALTL		31.2911	31.1453	30.5777	30.4177	30.9264	30.6798	30.963	30.6912
O94766;O94766-2	Galactosylgalactosylxylosylprotein 3-beta-glucuronosyltransferase 3	B3GAT3		26.9912	26.7532	26.2838	25.8544	26.6283	27.0189	26.9494	26.3844
P15291;P15291-2	Beta-1,4-galactosyltransferase 1;Lactose synthase A protein;N-acetyllactosamine synthase;Beta-N-acetylglucosaminylglycopeptide beta-1,4-galactosyltransferase;Beta-N-acetylglucosaminyl-glycolipid beta-1,4-galactosyltransferase;Processed beta-1,4-galactosyltransferase 1	B4GALT1		26.3522	26.7722	25.8028	28.5998	27.2009	27.7305	26.0308	29.4774
O60513	Beta-1,4-galactosyltransferase 4;N-acetyllactosamine synthase;Lactotriaosylceramide beta-1,4-galactosyltransferase	B4GALT4		28.1656	28.8102	28.8671	29.0909	28.4927	28.62	29.7866	29.296
Q9UBV7	Beta-1,4-galactosyltransferase 7;Xylosylprotein 4-beta-galactosyltransferase	B4GALT7		25.6155	25.4657	25.0414	24.9987	25.5963	25.3519	25.1704	25.1347
O43505	Beta-1,4-glucuronyltransferase 1	B4GAT1		25.493	25.9713	25.3687	25.3352	25.8542	25.4931	NaN	25.7363
Q9NWV8;Q9NWV8-3	BRISC and BRCA1-A complex member 1	BABAM1		30.5233	30.5289	30.5429	30.6103	30.4235	30.7462	30.1846	30.292
O14867	Transcription regulator protein BACH1	BACH1		27.6468	26.9627	26.7036	25.9766	26.682	25.9608	27.0441	26.2025
Q92934	Bcl2-associated agonist of cell death	BAD		29.52	28.7213	28.8873	28.28	29.3368	29.0315	28.7424	28.6417
Q99933;Q99933-4;Q99933-3;Q99933-2	BAG family molecular chaperone regulator 1	BAG1		28.7449	28.3579	28.6693	26.8622	28.8008	27.9986	27.915	27.8126
O95816;O95816-2	BAG family molecular chaperone regulator 2	BAG2		34.1091	34.0004	34.2838	34.3452	34.5269	34.3474	33.9265	33.8404
O95817	BAG family molecular chaperone regulator 3	BAG3		32.6634	32.5795	32.9076	33.0577	32.9918	33.1927	32.8767	32.9367
O95429;O95429-2	BAG family molecular chaperone regulator 4	BAG4		26.792	25.8664	26.1646	26.2762	26.1811	26.1361	25.8148	25.5855
Q9UL15;Q9UL15-2	BAG family molecular chaperone regulator 5	BAG5		30.0488	30.5079	29.5362	30.4149	30.0333	30.3898	29.5553	29.9598
P46379;P46379-2;P46379-3;P46379-5;P46379-4	Large proline-rich protein BAG6	BAG6		31.3125	30.7362	30.8579	30.6756	31.0498	30.8887	31.0141	31.1852
Q9UQB8;Q9UQB8-5;Q9UQB8-4;Q9UQB8-3;Q9UQB8-6;Q9UQB8-2	Brain-specific angiogenesis inhibitor 1-associated protein 2	BAIAP2		30.7734	30.3308	30.6189	29.7156	30.3371	29.6402	30.0185	28.645
Q9UHR4	Brain-specific angiogenesis inhibitor 1-associated protein 2-like protein 1	BAIAP2L1		25.1122	NaN	25.4491	NaN	25.3063	NaN	27.1033	26.6835
Q16611;Q16611-2	Bcl-2 homologous antagonist/killer	BAK1		27.1787	26.9196	26.769	27.545	26.9683	27.2185	27.4252	28.4082
O75531	Barrier-to-autointegration factor;Barrier-to-autointegration factor, N-terminally processed	BANF1		33.5787	33.627	33.5742	33.7443	33.6012	33.9256	33.6764	33.7
Q92560	Ubiquitin carboxyl-terminal hydrolase BAP1	BAP1		24.6463	24.9334	24.7948	24.9546	24.5753	24.9889	25.4288	25.5778
Q8IXM2;Q8IXM2-3	Chromatin complexes subunit BAP18	BAP18		29.6398	30.3844	29.25	30.4454	29.7812	30.3725	29.6601	30.6362
P80723;P80723-2	Brain acid soluble protein 1	BASP1		32.5552	33.4658	33.0323	34.1454	32.9981	33.7962	33.7962	34.345
Q07812;Q07812-2;Q07812-5;Q07812-8;Q07812-7	Apoptosis regulator BAX	BAX		32.2929	32.1096	32.2435	32.1865	32.6403	32.8188	31.9944	32.5653
Q9NRL2;Q9NRL2-2	Bromodomain adjacent to zinc finger domain protein 1A	BAZ1A		26.8987	27.1071	27.4655	26.7728	26.4942	27.2821	28.0937	27.5061
Q9UIG0;Q9UIG0-2	Tyrosine-protein kinase BAZ1B	BAZ1B		30.3306	30.4708	30.4483	30.5261	30.2614	30.374	30.5808	30.3683
A8MTZ0;A8MTZ0-3;A8MTZ0-2	BBSome-interacting protein 1	BBIP1		24.1961	25.0461	25.372	24.279	24.952	23.9261	25.1726	24.8459
Q8NFJ9;Q8NFJ9-2;Q8NFJ9-3	Bardet-Biedl syndrome 1 protein	BBS1		29.3172	27.5668	27.7419	27.6362	27.9859	27.1059	27.2375	26.2867
Q9BXC9	Bardet-Biedl syndrome 2 protein	BBS2		29.2264	29.0446	28.5725	28.4149	28.6711	28.4842	27.9237	27.8112
Q96RK4;Q96RK4-2;Q96RK4-3	Bardet-Biedl syndrome 4 protein	BBS4		28.2029	27.4507	27.6978	27.4431	28.6894	26.8458	28.1841	26.329
Q8N3I7;Q8N3I7-2	Bardet-Biedl syndrome 5 protein	BBS5		26.8957	28.8202	29.6757	28.5848	29.9011	28.4236	29.3287	27.8354
Q8IWZ6;Q8IWZ6-2	Bardet-Biedl syndrome 7 protein	BBS7		28.3822	28.396	28.1765	27.9414	28.5732	28.4141	28.1821	27.4455
Q3SYG4;Q3SYG4-4;Q3SYG4-2;Q3SYG4-7;Q3SYG4-3	Protein PTHB1	BBS9		27.4756	27.9977	27.6668	27.445	27.315	27.7755	27.6328	27.6012
P50895	Basal cell adhesion molecule	BCAM		25.3013	24.1607	26.3018	25.5517	24.165	24.3316	25.8113	24.6989
Q9UHQ4;Q9UHQ4-2	B-cell receptor-associated protein 29	BCAP29		31.567	32.4414	31.4539	32.3021	31.9291	32.4774	31.7057	32.6832
P51572-2;P51572	B-cell receptor-associated protein 31	BCAP31		33.2242	34.2714	33.4902	34.7372	33.3657	33.9564	33.4385	34.6136
P56945;P56945-7;P56945-5;P56945-3;P56945-2;P56945-6;P56945-4	Breast cancer anti-estrogen resistance protein 1	BCAR1		30.3266	30.3137	31.0229	30.59	31.1506	30.9686	31.1913	30.7423
O75815;O75815-3;O75815-2	Breast cancer anti-estrogen resistance protein 3	BCAR3		29.2678	28.8204	29.9309	29.0066	30.0512	29.5525	29.3879	29.4931
O75934	Pre-mRNA-splicing factor SPF27	BCAS2		29.7994	30.3111	29.8066	30.1331	30.3888	30.2084	30.3291	30.4041
Q9H6U6-3;Q9H6U6-8;Q9H6U6-7	Breast carcinoma-amplified sequence 3	BCAS3		29.4893	29.2941	29.073	29.0973	29.5964	29.461	28.9796	28.5402
Q8TDM0-3;Q8TDM0-2	Breast carcinoma-amplified sequence 4	BCAS4		24.6125	24.7558	24.9912	25.6235	26.0212	25.5022	24.7901	24.7893
P54687;P54687-4;P54687-3;P54687-2	Branched-chain-amino-acid aminotransferase, cytosolic	BCAT1		30.7626	30.6809	29.8716	30.3266	30.7468	30.448	29.9246	30.1055
O15382;O15382-2	Branched-chain-amino-acid aminotransferase, mitochondrial	BCAT2		30.7438	31.1047	29.7594	30.4791	29.7721	30.4631	29.8326	30.5586
Q9P287;Q9P287-3;Q9P287-2;Q9P287-4	BRCA2 and CDKN1A-interacting protein	BCCIP		31.5493	31.0854	31.7313	30.8932	31.1282	30.4414	31.8053	31.0093
P12694;P12694-2	2-oxoisovalerate dehydrogenase subunit alpha, mitochondrial	BCKDHA		31.3554	30.6543	31.6703	30.7553	31.3644	30.8417	31.0711	30.5618
P21953	2-oxoisovalerate dehydrogenase subunit beta, mitochondrial	BCKDHB		29.0722	29.5132	29.2118	29.4658	29.3883	29.0437	29.7148	29.0407
O14874;O14874-2;O14874-3	[3-methyl-2-oxobutanoate dehydrogenase [lipoamide]] kinase, mitochondrial	BCKDK		28.6255	29.359	28.582	29.0315	28.7278	29.0411	28.7257	28.3832
O95999	B-cell lymphoma/leukemia 10	BCL10		29.3681	28.567	29.5722	28.9627	29.6739	29.1254	29.0833	28.119
Q07817;Q07817-3;Q07817-2	Bcl-2-like protein 1	BCL2L1		28.6415	28.3293	26.9363	27.5439	29.7045	26.264	27.5045	27.6523
Q9HB09;Q9HB09-3	Bcl-2-like protein 12	BCL2L12		24.9876	25.1209	24.9281	25.1098	25.0945	24.4463	25.6029	25.0205
Q9BXK5;Q9BXK5-4	Bcl-2-like protein 13	BCL2L13		31.4141	31.6438	31.2963	31.669	31.4662	31.895	31.9104	31.8334
Q92843-2	Bcl-2-like protein 2	BCL2L2		27.4663	26.746	27.2496	26.5071	27.1525	26.1665	26.7917	24.883
Q8WUZ0;Q8WUZ0-2	B-cell CLL/lymphoma 7 protein family member C	BCL7C		26.6176	27.3076	27.7791	27.4174	28.3321	26.9155	28.3816	26.7468
Q86UU0;Q86UU0-3;Q86UU0-4;Q86UU0-2	B-cell CLL/lymphoma 9-like protein	BCL9L		27.6401	26.6915	28.4008	28.7236	28.2875	28.1988	28.5492	28.4571
Q9NYF8;Q9NYF8-2;Q9NYF8-4	Bcl-2-associated transcription factor 1	BCLAF1		31.9403	32.3922	32.366	32.363	31.9389	31.8702	32.328	32.4903
Q9NYF8-3	Bcl-2-associated transcription factor 1	BCLAF1		23.9424	25.4595	25.4779	25.9205	24.9259	25.6096	25.966	25.7491
P11274;P11274-2	Breakpoint cluster region protein	BCR		28.7262	28.6336	28.5438	28.4064	28.2074	28.2475	28.5208	28.5938
Q9Y276	Mitochondrial chaperone BCS1	BCS1L		29.0957	28.3077	29.0005	28.4094	28.429	28.7407	28.116	29.0436
Q02338	D-beta-hydroxybutyrate dehydrogenase, mitochondrial	BDH1		25.0201	24.0648	25.8779	24.5157	26.4448	25.0705	25.1636	25.9037
Q9BUT1;Q9BUT1-3;Q9BUT1-2	3-hydroxybutyrate dehydrogenase type 2	BDH2		30.683	30.7417	30.8299	31.3587	30.7313	30.7391	29.8099	29.7914
P30411;P30411-2	B2 bradykinin receptor	BDKRB2		25.7784	24.1989	24.4073	NaN	24.2765	23.8528	NaN	NaN
Q14457	Beclin-1	BECN1		29.9784	29.3114	30.1039	30.0379	30.2507	29.8812	30.1787	29.3366
O15155;O15155-2	BET1 homolog	BET1		30.4959	30.0054	29.5491	29.5032	28.7184	29.6235	29.1302	29.7451
Q9NYM9	BET1-like protein	BET1L		28.8354	28.3362	29.0756	28.6051	28.8954	29.1147	28.9014	29.0753
P21810	Biglycan	BGN		29.4471	29.3693	30.5987	30.5719	30.2756	30.3241	30.6655	30.585
Q9H2M3;Q9H2M3-2	S-methylmethionine--homocysteine S-methyltransferase BHMT2	BHMT2		24.1356	NaN	26.033	25.5717	24.7721	NaN	24.5548	NaN
Q9H694;Q9H694-2	Protein bicaudal C homolog 1	BICC1		30.4308	30.7464	30.5114	30.9653	30.8831	30.7844	29.6849	30.0128
Q8TD16;Q8TD16-2	Protein bicaudal D homolog 2	BICD2		30.8731	30.6615	31.0862	30.8622	30.8808	30.324	30.779	30.6981
P55957-2	BH3-interacting domain death agonist;BH3-interacting domain death agonist p15;BH3-interacting domain death agonist p13;BH3-interacting domain death agonist p11	BID		29.0119	29.688	29.4858	29.2105	29.4361	29.1539	29.2469	28.8642
O00499;O00499-2;O00499-6;O00499-3;O00499-5;O00499-9;O00499-7;O00499-4;O00499-11;O00499-10;O00499-8	Myc box-dependent-interacting protein 1	BIN1		33.2876	33.4759	31.4157	31.6657	32.3228	32.5076	32.4649	32.4154
Q9NQY0;Q9NQY0-2	Bridging integrator 3	BIN3		29.9679	28.8092	29.8116	28.5104	29.7106	28.4927	29.3422	27.5009
Q13490;Q13490-2	Baculoviral IAP repeat-containing protein 2	BIRC2		28.226	27.3567	28.2994	27.1491	27.7668	27.2567	28.0871	27.3777
Q9NR09	Baculoviral IAP repeat-containing protein 6	BIRC6		30.7689	30.9286	30.9136	30.8877	30.7932	31.0234	31.2182	31.0655
Q13867	Bleomycin hydrolase	BLMH		29.9892	30.3392	30.4993	30.8214	30.5044	31.2343	30.4161	31.0614
P78537;P78537-2	Biogenesis of lysosome-related organelles complex 1 subunit 1	BLOC1S1		29.0209	29.1348	28.543	29.541	28.7865	29.5619	28.0534	29.0626
Q6QNY1	Biogenesis of lysosome-related organelles complex 1 subunit 2	BLOC1S2		29.2034	29.4215	28.9442	29.9852	29.2378	29.9271	29.2667	29.9358
Q6QNY0	Biogenesis of lysosome-related organelles complex 1 subunit 3	BLOC1S3		27.8861	29.193	27.6218	28.4564	27.9606	28.2843	27.6192	27.779
Q9NUP1	Biogenesis of lysosome-related organelles complex 1 subunit 4	BLOC1S4		26.1502	26.134	27.0641	25.3034	27.1622	25.7863	27.1295	26.3782
Q8TDH9;Q8TDH9-3;Q8TDH9-2	Biogenesis of lysosome-related organelles complex 1 subunit 5	BLOC1S5		28.1621	29.8552	27.7841	29.3829	28.3808	29.8058	25.6644	28.9724
Q9UL45	Biogenesis of lysosome-related organelles complex 1 subunit 6	BLOC1S6		27.6279	27.3032	26.5671	27.4402	27.5379	26.9512	25.9012	26.5049
P53004	Biliverdin reductase A	BLVRA		31.618	31.7643	31.8883	31.9696	32.1455	32.3915	31.5632	31.6181
P30043	Flavin reductase (NADPH)	BLVRB		33.8215	33.5381	33.8576	33.8738	33.6258	33.8039	33.7326	33.2949
P35226	Polycomb complex protein BMI-1	BMI1		27.0789	26.9098	27.2935	27.0331	26.8564	27.1442	26.7392	26.7575
P13497;P13497-5;P13497-2;P13497-6;P13497-4	Bone morphogenetic protein 1	BMP1		25.075	25.1055	24.6654	25.1013	25.176	24.819	27.4769	27.5177
Q9NSY1;Q9NSY1-2;Q9NSY1-3	BMP-2-inducible protein kinase	BMP2K		30.6598	30.4434	30.8324	30.5698	31.6024	31.4611	30.5578	30.6805
Q8N8U9	BMP-binding endothelial regulator protein	BMPER		30.2495	29.9977	28.7558	29.0644	29.6625	29.8782	28.6584	28.7534
P36894	Bone morphogenetic protein receptor type-1A	BMPR1A		26.2788	25.5477	24.5241	24.3076	25.9624	25.7225	26.9168	25.3735
Q13873;Q13873-2	Bone morphogenetic protein receptor type-2	BMPR2		26.7493	27.4374	27.0148	26.4029	27.1836	27.0494	27.4552	28.0437
Q14692	Ribosome biogenesis protein BMS1 homolog	BMS1		29.8504	29.4838	30.0672	29.5978	29.8425	29.0283	29.9327	29.4586
Q12981;Q12981-1;Q12981-2;Q12981-3	Vesicle transport protein SEC20	BNIP1		29.0834	29.02	28.6833	29.6546	29.1756	29.4531	29.1288	29.9709
Q12983	BCL2/adenovirus E1B 19 kDa protein-interacting protein 3	BNIP3		26.2987	25.994	26.0327	25.3925	26.1884	25.7892	25.895	27.4201
O60238;O60238-2	BCL2/adenovirus E1B 19 kDa protein-interacting protein 3-like	BNIP3L		30.1225	28.9332	29.6229	29.1008	29.4756	29.4282	29.7813	29.1534
Q96IK1	Biorientation of chromosomes in cell division protein 1	BOD1		27.6079	26.8817	27.656	26.7524	27.4814	26.4306	NaN	25.9048
Q8NFC6	Biorientation of chromosomes in cell division protein 1-like 1	BOD1L1		29.9817	29.5164	30.2256	29.8998	29.9431	29.6866	30.2071	29.2312
Q9Y3E2	BolA-like protein 1	BOLA1		26.1609	27.7201	26.265	25.5877	26.6404	NaN	25.7491	25.1161
Q9H3K6;Q9H3K6-2	BolA-like protein 2	BOLA2		31.7867	31.6493	31.2844	31.7321	31.7054	32.2546	31.3128	31.9159
Q53S33	BolA-like protein 3	BOLA3		28.9098	28.3977	28.57	27.6334	28.4404	27.7069	28.0336	27.7616
Q14137;Q14137-2	Ribosome biogenesis protein BOP1	BOP1		31.3272	31.1718	31.4621	30.8098	31.1972	31.14	31.685	31.6738
P07738	Bisphosphoglycerate mutase	BPGM		30.0888	29.9845	30.0737	30.0469	30.0185	29.1647	30.1448	29.6595
Q86WA6;Q86WA6-2	Valacyclovir hydrolase	BPHL		28.8327	29.0889	28.0199	29.5286	28.6401	29.9549	28.6221	29.3571
P17213	Bactericidal permeability-increasing protein	BPI		22.9411	24.8173	24.749	25.0015	23.9616	NaN	24.3936	23.8774
O95861;O95861-2;O95861-4	3(2),5-bisphosphate nucleotidase 1	BPNT1		32.4068	32.0507	31.8987	31.7592	32.2282	31.3874	31.8301	31.3477
Q12830;Q12830-4;Q12830-2	Nucleosome-remodeling factor subunit BPTF	BPTF		29.6251	29.5308	29.6258	29.6017	29.5721	29.4205	29.7213	29.1703
P15056	Serine/threonine-protein kinase B-raf	BRAF		28.6784	28.2336	28.4397	28.3968	28.4468	28.2848	28.3585	28.4383
Q7Z569;Q7Z569-2	BRCA1-associated protein	BRAP		28.0974	28.9168	28.2612	28.6403	28.2712	28.1439	28.3959	28.5812
Q6PJG6;Q6PJG6-3	BRCA1-associated ATM activator 1	BRAT1		27.6921	27.7242	27.9591	27.9461	27.5156	27.7551	27.3186	27.9427
P46736;P46736-2;P46736-3;P46736-4;P46736-5	Lys-63-specific deubiquitinase BRCC36	BRCC3		30.2441	30.2931	30.1285	30.9007	30.1855	30.9376	30.3096	30.4354
O95696;O95696-2	Bromodomain-containing protein 1	BRD1		26.2018	NaN	25.6641	26.3978	26.458	25.6604	26.3443	26.0483
P25440;P25440-2;P25440-3;P25440-4	Bromodomain-containing protein 2	BRD2		27.9871	28.2076	28.1711	27.9642	28.0629	28.1503	27.6812	27.6213
Q15059;Q15059-2	Bromodomain-containing protein 3	BRD3		28.7666	27.7933	28.4805	28.2798	28.6223	28.2628	28.0862	27.8578
O60885;O60885-2;O60885-3	Bromodomain-containing protein 4	BRD4		30.1548	29.7488	29.9265	30.1636	29.566	29.6777	29.6993	29.661
Q9H0E9-2;Q9H0E9-4;Q9H0E9-3	Bromodomain-containing protein 8	BRD8		27.2741	26.2768	28.3373	27.071	27.5631	27.0915	27.9727	26.7993
Q9H8M2;Q9H8M2-6;Q9H8M2-3;Q9H8M2-1;Q9H8M2-2	Bromodomain-containing protein 9	BRD9		25.293	26.2704	26.1464	25.4988	25.5039	25.7509	25.769	26.2853
Q9NXR7;Q9NXR7-4;Q9NXR7-3;Q9NXR7-1	BRCA1-A complex subunit BRE	BRE		28.5961	28.9077	28.8042	28.9957	28.128	28.941	28.2632	28.4597
O95415	Brain protein I3	BRI3		27.2455	27.8213	27.0121	26.5876	26.8819	27.6954	26.9665	28.1131
Q8WY22	BRI3-binding protein	BRI3BP		28.0442	27.0824	27.4827	27.8454	28.0486	28.2421	28.2185	26.8504
Q8TDN6	Ribosome biogenesis protein BRX1 homolog	BRIX1		31.8231	31.7594	31.7414	31.5183	31.5137	31.2327	32.0196	31.9123
Q8WUW1;Q8WUW1-2	Protein BRICK1	BRK1		30.374	29.3916	30.4981	29.7505	30.4018	28.6434	30.6048	28.2046
Q5PSV4;Q5PSV4-2	Breast cancer metastasis-suppressor 1-like protein	BRMS1L		25.4835	25.7376	24.7766	26.8291	24.6543	26.2398	25.1769	24.6985
Q5VW32;Q5VW32-2	BRO1 domain-containing protein BROX	BROX		30.59	30.7777	30.7071	30.7625	30.8581	30.225	30.8734	30.025
Q96G97;Q96G97-3;Q96G97-4	Seipin	BSCL2		26.8624	27.3129	27.1738	26.2715	26.3763	26.6078	26.0648	27.9654
Q9NW68;Q9NW68-7;Q9NW68-3;Q9NW68-2;Q9NW68-8;Q9NW68-9;Q9NW68-4	BSD domain-containing protein 1	BSDC1		30.0079	30.0951	30.1121	30.1116	29.8947	30.0932	30.2702	30.115
P35613;P35613-2;P35613-4	Basigin	BSG		33.3189	33.6343	33.3865	34.1575	33.6427	33.9574	33.4668	33.9882
Q10588;Q10588-2	ADP-ribosyl cyclase/cyclic ADP-ribose hydrolase 2	BST1		32.5394	31.9465	31.6966	31.4948	32.0318	31.7511	32.956	32.7711
O14981	TATA-binding protein-associated factor 172	BTAF1		29.1262	28.9771	28.8392	29.3549	28.8761	28.6548	29.0985	29.74
Q9H0C5;Q9H0C5-2	BTB/POZ domain-containing protein 1	BTBD1		27.0739	26.8653	27.5706	27.0813	27.189	27.2437	26.8804	26.2723
Q9BX70;Q9BX70-2	BTB/POZ domain-containing protein 2	BTBD2		27.9151	28.1806	28.2077	27.2075	28.0501	27.0242	27.1298	27.5497
Q5XKL5-2;Q5XKL5	BTB/POZ domain-containing protein 8	BTBD8		25.1921	23.3877	NaN	22.9913	NaN	23.6117	NaN	22.9149
Q96Q07;Q96Q07-3;Q96Q07-2	BTB/POZ domain-containing protein 9	BTBD9		27.0161	26.9516	25.9243	25.4678	25.8609	26.7065	25.9121	25.2928
P43251;P43251-4;P43251-3;P43251-2	Biotinidase	BTD		27.4325	26.3019	26.2035	26.3345	26.9125	26.0688	25.5549	25.0718
P20290;P20290-2	Transcription factor BTF3	BTF3		31.4308	31.2791	31.5876	31.7318	32.0428	31.526	32.0118	31.9148
Q96K17;Q96K17-2	Transcription factor BTF3 homolog 4	BTF3L4		31.8475	31.889	32.418	32.1024	32.0898	31.9234	32.2205	31.8678
Q14201;Q14201-2	Protein BTG3	BTG3		28.6537	32.8923	29.6946	32.5042	28.5692	32.9991	28.1014	31.7739
Q7KYR7;Q7KYR7-5;Q7KYR7-1;Q7KYR7-3;Q7KYR7-6;Q7KYR7-4	Butyrophilin subfamily 2 member A1	BTN2A1		28.6793	28.4527	28.3556	28.0419	27.967	27.997	28.7279	28.8049
O00478;O00478-2	Butyrophilin subfamily 3 member A3	BTN3A3		28.25	28.0874	28.3919	28.5757	27.9569	26.5706	28.1442	28.0897
O43684;O43684-2	Mitotic checkpoint protein BUB3	BUB3		32.2914	32.0415	32.6835	32.3494	32.438	31.8215	32.4849	32.3971
Q9BRD0;Q9BRD0-2	BUD13 homolog	BUD13		26.0531	26.6454	26.6811	25.8397	26.5067	27.1216	26.8231	26.8345
P41223;P41223-2	Protein BUD31 homolog	BUD31		28.2968	28.9127	28.5625	29.161	28.4092	29.3605	28.6943	29.7229
Q13895	Bystin	BYSL		30.825	30.7674	30.6311	30.5101	30.57	30.4694	30.2224	30.4168
Q7L1Q6;Q7L1Q6-4;Q7L1Q6-3;Q7L1Q6-2	Basic leucine zipper and W2 domain-containing protein 1	BZW1		33.1923	33.4126	33.2876	33.3433	32.8975	33.272	33.2209	33.4234
Q9Y6E2	Basic leucine zipper and W2 domain-containing protein 2	BZW2		31.9001	32.3836	31.7343	32.0291	31.3545	32.6631	31.2393	31.8568
Q96B45	UPF0693 protein C10orf32	C10orf32		30.5265	30.2756	30.3576	30.5467	30.128	29.8998	30.0558	29.3947
Q9H7M9	Platelet receptor Gi24	C10orf54		27.7867	28.5684	28.1561	28.7851	27.7957	28.7136	28.6098	28.1821
Q5T2E6	UPF0668 protein C10orf76	C10orf76		29.2022	29.5173	28.9308	28.9033	29.0947	29.3526	28.8711	28.5925
Q9H0W9;Q9H0W9-2;Q9H0W9-3;Q9H0W9-4	Ester hydrolase C11orf54	C11orf54		31.3319	31.2875	30.8349	30.6325	31.3139	31.1691	30.416	29.9007
Q6ZUT1;Q6ZUT1-2;Q6ZUT1-3	Uncharacterized protein C11orf57	C11orf57		NaN	24.2807	24.4383	24.2938	NaN	NaN	NaN	24.8729
Q9H3H3-2;Q9H3H3	UPF0696 protein C11orf68	C11orf68		32.5228	32.1561	32.18	32.0366	32.3495	31.7491	31.8406	31.3958
Q53FT3	Protein Hikeshi	C11orf73		29.6209	28.3908	29.3165	28.7627	29.7691	28.8523	28.8325	28.724
Q7Z7L8	Uncharacterized protein C11orf96	C11orf96		26.7525	26.759	26.2712	26.3808	27.2837	28.1606	29.4253	29.7185
E9PRG8	Uncharacterized protein C11orf98	C11orf98		26.8915	26.6044	27.6207	27.4525	27.7192	26.0216	28.0162	24.5137
Q9HB07	UPF0160 protein MYG1, mitochondrial	C12orf10		31.8543	31.6658	31.4778	31.6841	31.6081	32.0312	31.2716	30.9956
Q8N999;Q8N999-3	Uncharacterized protein C12orf29	C12orf29		27.9852	27.6851	27.4866	27.2587	28.5166	28.1875	28.5436	28.704
Q9NQ89	Protein C12orf4	C12orf4		28.5315	27.5833	27.9858	27.3175	28.465	26.8433	27.5673	24.7436
Q96C57	Uncharacterized protein C12orf43	C12orf43		28.3099	28.0298	28.3221	27.603	27.9572	28.083	27.9167	27.9104
Q99622	Protein C10	C12orf57		28.6895	29.0318	29.5373	28.7507	29.6067	29.0844	29.6342	28.8709
Q9UKR5	Probable ergosterol biosynthetic protein 28	C14orf1		29.4473	28.195	26.4048	27.9306	28.8736	27.0383	29.2404	28.2662
Q9NWQ9	Uncharacterized protein C14orf119	C14orf119		27.6786	25.6856	27.8609	25.4487	28.1072	27.0462	27.9261	27.6583
Q7Z3D6-2;Q7Z3D6;Q7Z3D6-4;Q7Z3D6-3;Q7Z3D6-5	UPF0317 protein C14orf159, mitochondrial	C14orf159		29.9295	30.2736	29.6549	29.8732	29.8257	29.6009	28.2557	28.5902
Q9Y224	UPF0568 protein C14orf166	C14orf166		32.0065	31.6754	31.8176	31.9463	31.9902	32.1545	32.0661	32.0562
Q8WUR7;Q8WUR7-2;Q8WUR7-3	UPF0235 protein C15orf40	C15orf40		28.6025	27.2848	28.1678	28.2446	28.4739	28.3574	26.6594	29.3739
Q6ZUT6;Q6ZUT6-4;Q6ZUT6-2	Uncharacterized protein C15orf52	C15orf52		29.9304	29.7412	30.5263	30.0523	30.0375	30.2796	29.8246	30.1079
Q9BV29;Q9BV29-2;Q9BV29-3	Uncharacterized protein C15orf57	C15orf57		26.8009	26.5303	26.2795	26.4669	26.768	27.2056	26.6786	27.318
Q96S19;Q96S19-3;Q96S19-5;Q96S19-4;Q96S19-2;Q96S19-6	UPF0585 protein C16orf13	C16orf13		29.9743	30.4083	30.1872	30.3055	30.0076	30.4354	29.795	30.2813
Q96MC5;Q96MC5-2	Uncharacterized protein C16orf45	C16orf45		28.1682	28.1747	26.881	27.0246	27.4071	26.6071	27.7173	25.8525
Q96GQ5	RUS1 family protein C16orf58	C16orf58		28.7983	28.7251	29.3206	28.8976	29.3149	29.1372	29.0579	29.0719
Q7Z3J2;Q7Z3J2-2	UPF0505 protein C16orf62	C16orf62		32.4548	32.3343	32.2455	32.3631	32.1662	32.1253	32.0204	31.6678
Q9BSU1	UPF0183 protein C16orf70	C16orf70		29.3446	28.0471	29.256	28.2822	29.3144	27.7848	28.676	27.8677
Q96GS4	Uncharacterized protein C17orf59	C17orf59		28.2766	27.7044	27.8528	27.8241	28.2574	28.0652	28.2454	27.6523
Q9BQA9;Q9BQA9-2	Uncharacterized protein C17orf62	C17orf62		26.06	27.9811	26.3537	27.808	24.9509	27.8124	26.4906	26.3837
Q9HAS0	Protein Njmu-R1	C17orf75		27.8484	28.0781	28.1191	28.1076	28.2828	27.9171	28.3791	27.9762
Q9BSJ5;Q9BSJ5-3;Q9BSJ5-2	Uncharacterized protein C17orf80	C17orf80		25.1342	24.8701	25.9465	24.753	25.2905	25.8959	25.7851	25.9946
Q53F19;Q53F19-2	Uncharacterized protein C17orf85	C17orf85		28.7403	28.3163	28.7391	27.6668	28.248	28.3439	28.8307	29.1976
A1L188	Uncharacterized protein C17orf89	C17orf89		24.923	24.0167	NaN	24.2416	24.9128	NaN	24.7332	24.1015
Q96B23-2;Q96B23	Uncharacterized protein C18orf25	C18orf25		28.7162	27.7079	28.9849	28.4755	29.4921	28.2305	30.0069	27.9859
Q96DM3	Uncharacterized protein C18orf8	C18orf8		29.204	29.1081	29.3096	29.5799	29.2527	29.451	29.5022	29.5055
Q9UFG5;Q9UFG5-2	UPF0449 protein C19orf25	C19orf25		28.1837	28.3654	28.4775	28.2187	28.1992	28.1833	28.5536	28.3008
Q9BQ61	Uncharacterized protein C19orf43	C19orf43		27.4835	29.3732	27.0632	29.4343	27.3545	29.4071	27.3319	29.4211
Q9BSF4	Uncharacterized protein C19orf52	C19orf52		28.3915	27.2201	28.4034	27.4338	27.3143	27.8358	28.0833	27.0366
Q9UNZ5	Leydig cell tumor 10 kDa protein homolog	C19orf53		27.8373	27.4981	28.5705	27.9743	28.5526	28.3328	NaN	29.313
Q9NUL5;Q9NUL5-4;Q9NUL5-3;Q9NUL5-2	UPF0515 protein C19orf66	C19orf66		30.3324	30.3252	30.3257	30.5667	30.0021	30.6413	30.1569	29.8751
Q9NS00;Q9NS00-2	Glycoprotein-N-acetylgalactosamine 3-beta-galactosyltransferase 1	C1GALT1		29.8743	30.1897	29.3694	29.6827	29.0043	29.2959	29.2523	29.6702
Q96EU7	C1GALT1-specific chaperone 1	C1GALT1C1		28.8048	29.46	28.3594	28.4929	28.0525	28.8984	28.3797	28.6631
Q6ZSJ8;Q6ZSJ8-2	Uncharacterized protein C1orf122	C1orf122		27.572	26.8321	27.7904	26.2429	27.8246	25.704	27.4371	27.5662
Q9NWV4	UPF0587 protein C1orf123	C1orf123		32.7767	31.9531	32.79	32.3527	32.755	32.2747	32.0049	31.6605
Q8IYL3	UPF0688 protein C1orf174	C1orf174		25.7758	25.5812	26.2878	24.9126	25.9958	28.7396	24.6095	27.3539
Q9H425;Q9H425-3;Q9H425-2	Uncharacterized protein C1orf198	C1orf198		32.4948	31.9051	31.9128	31.9698	32.0069	31.6335	33.7433	33.6216
Q9H246	Uncharacterized protein C1orf21	C1orf21		26.7474	27.5095	27.2989	26.0904	27.0683	28.0382	26.4726	26.264
Q9BV19	Uncharacterized protein C1orf50	C1orf50		28.8796	28.5834	29.1734	28.6764	28.6888	28.5452	28.8956	28.1061
Q07021	Complement component 1 Q subcomponent-binding protein, mitochondrial	C1QBP		33.1586	32.9575	33.0174	33.0892	33.0327	32.8202	33.3123	33.6442
Q9BXJ0	Complement C1q tumor necrosis factor-related protein 5	C1QTNF5		28.3517	27.5696	29.4616	29.2642	30.5825	30.2763	30.5388	29.9109
P00736	Complement C1r subcomponent;Complement C1r subcomponent heavy chain;Complement C1r subcomponent light chain	C1R		29.6783	28.5819	29.0214	29.348	29.2173	28.3635	28.7622	28.5983
P09871	Complement C1s subcomponent;Complement C1s subcomponent heavy chain;Complement C1s subcomponent light chain	C1S		30.1527	30.1759	30.341	30.3389	30.4165	29.4716	29.6785	29.045
Q5TEA3	Uncharacterized protein C20orf194	C20orf194		27.4	27.7603	27.2505	27.5777	27.6028	28.7255	26.4597	27.1219
Q9BUV8;Q9BUV8-4;Q9BUV8-3;Q9BUV8-2;Q9BUV8-5	Uncharacterized protein C20orf24	C20orf24		26.7993	26.5261	27.1508	26.5698	26.3754	25.9836	27.2405	26.4675
Q9GZN8;Q9GZN8-2	UPF0687 protein C20orf27	C20orf27		31.3888	31.4119	30.8932	30.4601	31.3824	31.3885	30.6439	30.4854
O43822;O43822-4;O43822-3;O43822-2	Protein C21orf2	C21orf2		24.7236	26.7447	23.9984	26.0845	25.6544	26.607	24.7895	NaN
P30042;P30042-2	ES1 protein homolog, mitochondrial	C21orf33		32.1842	32.47	31.981	32.734	32.0723	32.6254	32.098	32.5845
P57076	UPF0769 protein C21orf59	C21orf59		26.7761	26.6792	27.0191	26.9694	27.0361	26.3851	27.2871	26.3268
Q9Y426;Q9Y426-3;Q9Y426-2	C2 domain-containing protein 2	C2CD2		29.5232	28.7224	29.6297	29.1146	29.6232	29.13	29.4643	28.7651
O14523;O14523-2	C2 domain-containing protein 2-like	C2CD2L		25.8907	24.6476	24.9906	25.0509	25.6654	26.3047	25.3571	25.9526
Q86YS7-3;Q86YS7;Q86YS7-2;Q86YS7-4;Q86YS7-5	C2 domain-containing protein 5	C2CD5		29.7548	29.1583	29.5041	29.3491	29.597	29.192	28.9911	28.6236
Q9H6V9;Q9H6V9-2;Q9H6V9-3;Q9H6V9-4	UPF0554 protein C2orf43	C2orf43		28.0072	27.2142	28.4158	27.8104	28.61	28.0329	28.3347	28.0974
Q8WWC4	Uncharacterized protein C2orf47, mitochondrial	C2orf47		29.1058	28.8028	29.0731	28.9839	28.7666	28.8197	29.0772	28.3934
Q9BVC5;Q9BVC5-2	Ashwin	C2orf49		24.9191	26.3948	27.1996	25.5246	26.7253	26.9504	27.4032	27.6019
Q8N8R5	UPF0565 protein C2orf69	C2orf69		26.4748	25.9625	25.9517	25.9086	24.9741	25.2072	25.1832	25.9739
Q3KRA6	UPF0538 protein C2orf76	C2orf76		NaN	26.6559	26.6016	26.9321	NaN	26.689	26.2161	26.1648
P01024	Complement C3;Complement C3 beta chain;C3-beta-c;Complement C3 alpha chain;C3a anaphylatoxin;Acylation stimulating protein;Complement C3b alpha chain;Complement C3c alpha chain fragment 1;Complement C3dg fragment;Complement C3g fragment;Complement C3d fragment;Complement C3f fragment;Complement C3c alpha chain fragment 2	C3		26.6505	26.8341	26.8588	25.0007	26.9278	24.9277	27.1342	25.8093
Q6NW34;Q6NW34-2	Uncharacterized protein C3orf17	C3orf17		26.5812	27.2182	26.9565	26.1448	27.199	27.2044	27.5706	27.1691
Q5JPI3;Q5JPI3-2	Uncharacterized protein C3orf38	C3orf38		27.2557	27.194	27.7581	27.5614	27.6769	27.6034	27.9155	27.4549
Q8NDZ4	Deleted in autism protein 1	C3orf58		28.1706	27.8947	27.1126	26.5304	27.6019	25.8507	28.0702	27.1734
P0C0L5	Complement C4-B;Complement C4 beta chain;Complement C4-B alpha chain;C4a anaphylatoxin;C4b-B;C4d-B;Complement C4 gamma chain	C4B		31.7077	28.7115	27.5567	NaN	25.5078	NaN	27.7909	NaN
Q9NWY4	UPF0609 protein C4orf27	C4orf27		28.7615	28.7677	28.5458	28.2133	28.9524	28.1016	28.7957	27.982
Q8WVX3	Uncharacterized protein C4orf3	C4orf3		28.6956	28.2935	28.6855	29.4819	29.5987	28.8657	29.7813	28.3754
Q8N8J7	Uncharacterized protein C4orf32	C4orf32		27.2173	NaN	27.2935	25.9417	26.6903	25.317	27.0262	24.7729
Q8N1A6	UPF0462 protein C4orf33	C4orf33		24.2058	25.8958	26.4302	26.7753	NaN	25.2383	NaN	NaN
Q49AR2	UPF0489 protein C5orf22	C5orf22		26.1062	26.3102	26.4221	26.1025	25.7992	26.0727	26.5919	27.1582
Q7Z6I8;Q7Z6I8-2	UPF0461 protein C5orf24	C5orf24		25.2368	25.835	25.3201	25.2921	25.133	25.2234	26.2536	25.9594
Q96GV9	UNC119-binding protein C5orf30	C5orf30		25.5036	25.042	27.4127	24.2914	26.8603	25.2435	25.0439	NaN
A6NDU8	UPF0600 protein C5orf51	C5orf51		29.904	29.3197	29.7328	29.4423	29.7055	29.3571	29.7197	29.4057
Q9H6K1;Q9H6K1-2	Uncharacterized protein C6orf106	C6orf106		24.4959	NaN	24.7147	24.6344	NaN	24.5951	NaN	24.5165
Q7Z4R8	UPF0669 protein C6orf120	C6orf120		29.5785	29.1842	29.5393	28.8558	29.3082	28.4832	28.6765	28.7509
Q5T0Z8	Uncharacterized protein C6orf132	C6orf132		28.2227	28.6877	28.1087	28.3291	NaN	27.8268	28.2888	27.4612
Q9P0P8	Uncharacterized protein C6orf203	C6orf203		29.2811	28.7793	29.0837	28.7898	29.0743	28.0911	29.24	28.6601
O95873	Uncharacterized protein C6orf47	C6orf47		25.9244	25.6996	26.2022	25.4647	26.1438	25.5308	26.3597	25.8478
Q6UWU4;Q6UWU4-2	Bombesin receptor-activated protein C6orf89	C6orf89		26.9675	26.2173	26.7954	26.7461	27.677	26.3021	26.3911	27.398
Q9BPX7	UPF0415 protein C7orf25	C7orf25		28.5172	28.7494	28.6278	29.1525	28.5933	29.0159	28.2683	28.3462
Q96N11;Q96N11-2	Uncharacterized protein C7orf26	C7orf26		24.1715	24.7975	23.8986	24.3903	24.7836	24.6955	24.9862	25.2179
Q9BRJ6	Uncharacterized protein C7orf50	C7orf50		28.5667	28.6539	29.003	28.7198	28.7045	29.1888	28.983	29.473
Q96HJ9	UPF0562 protein C7orf55	C7orf55		26.7988	25.4585	26.9837	26.7196	26.4883	26.0848	26.1494	25.6886
Q96HJ9-2;Q9Y383-2	UPF0562 protein C7orf55;Putative RNA-binding protein Luc7-like 2	C7orf55;LUC7L2		NaN	25.67	25.806	25.6779	NaN	24.5233	NaN	24.5933
Q1RMZ1	Probable methyltransferase BTM2 homolog	C7orf60		25.9424	26.3017	25.4699	25.4884	25.2224	25.1306	24.6186	26.3016
Q9H7E9;Q9H7E9-2	UPF0488 protein C8orf33	C8orf33		27.288	26.6979	28.1792	26.1465	27.7249	27.6583	28.2568	27.3624
Q6P1X6;Q6P1X6-2	UPF0598 protein C8orf82	C8orf82		29.5881	29.4371	28.3201	29.1953	28.5248	29.4376	28.378	29.4617
Q5T280	Putative methyltransferase C9orf114	C9orf114		25.0211	25.2268	25.7518	25.747	25.7418	25.637	25.9961	NaN
Q9BUH6	Protein PAXX	C9orf142		29.7533	28.9567	29.2199	29.0754	28.9043	28.9229	28.9292	28.9233
Q9BU70	Nef-associated protein 1	C9orf156		25.4042	24.6318	24.8451	NaN	25.4723	NaN	25.5623	NaN
Q5T6V5	UPF0553 protein C9orf64	C9orf64		30.379	30.3569	30.2086	30.5532	30.1376	30.3209	30.0048	29.6522
Q9NZ63	Uncharacterized protein C9orf78	C9orf78		27.8956	27.641	28.7572	28.1648	28.1988	28.005	28.0012	28.2232
Q96LW7-2;Q96LW7	Bcl10-interacting CARD protein	C9orf89		24.8805	27.7368	NaN	27.1684	25.1058	28.1146	26.6544	28.1003
O43570;O43570-2	Carbonic anhydrase 12	CA12		26.4754	26.6663	26.5516	25.9076	24.8405	25.93	23.7172	24.5126
Q8N1Q1	Carbonic anhydrase 13	CA13		23.9046	NaN	25.4552	24.8258	25.5298	24.7089	24.8607	NaN
Q9Y2D0	Carbonic anhydrase 5B, mitochondrial	CA5B		28.9733	27.9996	28.9119	26.2875	28.7705	28.0134	28.3752	27.9308
Q9Y376	Calcium-binding protein 39	CAB39		31.6401	31.3158	31.4556	31.1868	31.4897	31.5746	31.0427	30.8597
Q9H9S4	Calcium-binding protein 39-like	CAB39L		28.0414	26.914	26.968	25.427	26.371	25.3772	26.5892	25.3758
Q9Y6J0;Q9Y6J0-2	Calcineurin-binding protein cabin-1	CABIN1		27.5017	24.2814	27.9617	24.5015	27.9225	24.8262	27.4956	24.0705
Q8TDN4;Q8TDN4-2	CDK5 and ABL1 enzyme substrate 1	CABLES1		24.8027	NaN	24.3928	24.2989	25.1522	NaN	24.2466	24.3085
Q5VU97;Q5VU97-2	VWFA and cache domain-containing protein 1	CACHD1		30.2199	30.1306	29.4129	29.1501	30.015	29.7236	28.7615	28.5431
P54289;P54289-4;P54289-5;P54289-3;P54289-2	Voltage-dependent calcium channel subunit alpha-2/delta-1;Voltage-dependent calcium channel subunit alpha-2-1;Voltage-dependent calcium channel subunit delta-1	CACNA2D1		32.019	31.8257	31.6601	31.5498	31.7359	31.4899	32.2291	32.1438
P54284;P54284-3;P54284-4;P54284-5;P54284-2	Voltage-dependent L-type calcium channel subunit beta-3	CACNB3		24.8857	23.7832	25.8224	24.7884	25.0082	24.1203	24.9989	23.7361
Q8WUQ7;Q8WUQ7-2	Cactin	CACTIN		27.9844	28.0952	28.404	28.0467	28.1064	27.864	27.7631	25.816
Q86Y37;Q86Y37-2	CDK2-associated and cullin domain-containing protein 1	CACUL1		25.1568	27.6809	25.5453	26.2415	25.5333	28.6649	25.9659	26.9327
Q9HB71;Q9HB71-3	Calcyclin-binding protein	CACYBP		32.7171	33.0171	33.1054	32.824	32.7201	33.0866	32.7392	32.7064
P27708	CAD protein;Glutamine-dependent carbamoyl-phosphate synthase;Aspartate carbamoyltransferase;Dihydroorotase	CAD		33.7575	33.8908	33.9308	33.7974	33.6248	33.9541	33.5541	33.7228
Q9BY67;Q9BY67-5;Q9BY67-4;Q9BY67-3;Q9BY67-2	Cell adhesion molecule 1	CADM1		24.5393	22.8918	24.4873	22.3986	30.0532	30.6665	24.786	23.9877
P22676	Calretinin	CALB2		26.0718	24.3794	27.2315	25.6562	27.9357	NaN	28.8228	26.811
Q9P1Z2;Q9P1Z2-3;Q9P1Z2-2	Calcium-binding and coiled-coil domain-containing protein 1	CALCOCO1		28.753	29.0038	29.3988	29.3797	28.6871	28.2934	29.5974	29.0408
Q13137-4;Q13137;Q13137-3;Q13137-5;Q13137-2	Calcium-binding and coiled-coil domain-containing protein 2	CALCOCO2		30.0334	29.2181	30.0698	29.515	30.1221	29.5474	29.9063	29.4408
Q05682	Caldesmon	CALD1		36.5621	36.792	37.6766	38.1058	37.1638	37.4273	38.2476	38.5154
Q05682-4	Caldesmon	CALD1		30.9466	31.0967	32.2455	32.4825	32.0761	31.8058	33.6051	33.2887
Q05682-3	Caldesmon	CALD1		27.2584	29.311	26.9054	28.4164	26.9583	28.3808	26.1196	28.8613
Q9HA72	Calcium homeostasis modulator protein 2	CALHM2		28.7703	29.1361	28.8038	29.0148	28.5926	29.2204	28.0367	28.3334
P62158	Calmodulin	CALM1		35.7223	35.8428	35.7477	35.8565	36.0482	35.7557	35.8652	36.2195
P27797	Calreticulin	CALR		36.4946	37.153	36.4712	37.3005	36.7169	37.5988	36.5624	37.5025
O43852;O43852-3;O43852-6;O43852-5;O43852-15	Calumenin	CALU		36.1846	37.0585	35.978	36.9245	35.9345	36.885	36.2647	37.0268
O43852-4;O43852-2;O43852-8	Calumenin	CALU		32.0331	32.2528	32.3789	32.4711	32.5531	32.3915	32.6251	32.6533
Q14012	Calcium/calmodulin-dependent protein kinase type 1	CAMK1		30.6892	30.5933	30.7468	30.677	30.6509	30.747	30.7346	30.5214
Q8IU85;Q8IU85-2	Calcium/calmodulin-dependent protein kinase type 1D	CAMK1D		25.8828	27.3276	24.3803	NaN	23.5767	25.1202	25.4548	25.1448
Q13557;Q13557-6;Q13557-11;Q13557-3;Q13557-4;Q13557-8;Q13557-10;Q13557-9;Q13557-5	Calcium/calmodulin-dependent protein kinase type II subunit delta	CAMK2D		34.2769	34.486	33.8344	33.6244	33.4386	33.8319	33.4608	33.1232
Q13555-6;Q13555;Q13555-5;Q13555-2;Q13555-4;Q13555-8;Q13555-9;Q13555-10;Q13555-3;Q13555-7	Calcium/calmodulin-dependent protein kinase type II subunit gamma	CAMK2G		30.8235	30.1252	30.8148	30.1305	30.5432	30.398	30.801	30.5593
Q8N5S9;Q8N5S9-2	Calcium/calmodulin-dependent protein kinase kinase 1	CAMKK1		26.371	27.0169	25.9804	25.7375	25.7073	26.9699	25.1975	25.9197
Q96RR4;Q96RR4-2;Q96RR4-7;Q96RR4-3;Q96RR4-6;Q96RR4-4;Q96RR4-5	Calcium/calmodulin-dependent protein kinase kinase 2	CAMKK2		29.463	29.335	29.1736	28.9015	29.1403	29.2365	28.2399	27.9484
P49069	Calcium signal-modulating cyclophilin ligand	CAMLG		28.3986	28.2636	28.6073	27.6618	28.5813	27.4623	29.1835	28.9354
Q5T5Y3;Q5T5Y3-3;Q5T5Y3-2	Calmodulin-regulated spectrin-associated protein 1	CAMSAP1		28.2076	27.3519	28.7461	28.1359	28.6266	27.9928	28.9322	27.7977
Q08AD1;Q08AD1-2;Q08AD1-3	Calmodulin-regulated spectrin-associated protein 2	CAMSAP2		30.1493	29.7588	30.5374	29.8978	30.5177	29.9783	30.622	29.8771
Q86VP6;Q86VP6-2	Cullin-associated NEDD8-dissociated protein 1	CAND1		34.6246	34.6762	34.6527	34.955	34.5833	34.713	34.6426	34.9209
O75155;O75155-2	Cullin-associated NEDD8-dissociated protein 2	CAND2		25.7166	25.3919	26.3071	25.908	27.0877	26.6403	26.8496	25.7826
Q8WVQ1;Q8WVQ1-3;Q8WVQ1-2	Soluble calcium-activated nucleotidase 1	CANT1		28.9336	29.1988	29.1724	28.9367	28.9185	28.7021	29.0193	29.2106
P27824;P27824-2;P27824-3	Calnexin	CANX		35.6065	35.9777	35.537	36.2027	35.6471	36.0313	35.7819	36.455
Q01518	Adenylyl cyclase-associated protein 1	CAP1		35.945	36.641	35.8826	36.8605	35.9984	36.8571	36.1976	36.9982
P40123;P40123-2	Adenylyl cyclase-associated protein 2	CAP2		31.1135	31.2517	32.3482	33.0271	32.2172	32.8654	32.3146	32.569
P40121;P40121-2	Macrophage-capping protein	CAPG		35.8045	35.6875	35.4412	35.3768	35.5719	35.7839	34.7197	34.6219
P07384	Calpain-1 catalytic subunit	CAPN1		34.3496	34.1948	34.1922	34.0595	34.2308	33.7904	33.5121	33.5347
P17655;P17655-2	Calpain-2 catalytic subunit	CAPN2		35.1811	34.4129	35.1021	34.7783	35.0412	34.5406	34.5137	33.9377
O15484	Calpain-5	CAPN5		32.0743	31.3991	31.7822	31.3659	31.7451	31.1401	31.023	30.8702
Q9Y6W3	Calpain-7	CAPN7		29.9262	29.5896	29.686	29.4127	29.8575	29.3608	29.9716	29.6647
P04632	Calpain small subunit 1	CAPNS1		34.0918	34.1867	34.0894	34.0761	34.3127	34.3918	33.6862	33.8974
Q14444;Q14444-2	Caprin-1	CAPRIN1		33.1623	34.0907	33.2339	33.7998	33.2545	33.7898	33.2518	34.1624
Q13938;Q13938-3	Calcyphosin	CAPS		30.3117	28.5833	29.1905	26.4781	31.3743	30.8428	27.1018	23.3504
P52907	F-actin-capping protein subunit alpha-1	CAPZA1		34.5732	34.8381	34.6536	34.9308	34.4621	34.972	34.3955	34.6878
P47755;P47755-2	F-actin-capping protein subunit alpha-2	CAPZA2		34.7449	34.7561	34.53	34.8582	34.5555	34.6565	34.3343	34.596
P47756-2	F-actin-capping protein subunit beta	CAPZB		35.5799	35.4138	35.4271	35.4607	35.3913	35.3224	35.4437	35.2789
Q9BWT7;Q9BWT7-2	Caspase recruitment domain-containing protein 10	CARD10		26.638	28.329	25.9249	27.1297	25.7968	27.3226	25.7978	NaN
Q9BX69	Caspase recruitment domain-containing protein 6	CARD6		25.0218	24.9883	25.5078	24.6204	24.4916	24.2107	24.0799	NaN
Q9Y2V2	Calcium-regulated heat stable protein 1	CARHSP1		31.4143	32.24	31.1815	32.1929	31.3309	31.9628	29.6552	31.0043
Q8IW45;Q8IW45-4	ATP-dependent (S)-NAD(P)H-hydrate dehydratase	CARKD		30.7766	31.0521	30.4647	30.8695	30.4364	30.6293	30.5672	29.9927
Q86X55;Q86X55-1;Q86X55-2	Histone-arginine methyltransferase CARM1	CARM1		32.7059	32.6596	33.1511	32.8056	33.049	32.8879	32.481	32.5733
P49589-3;P49589	Cysteine--tRNA ligase, cytoplasmic	CARS		33.4487	33.6896	33.2214	34.0713	33.3727	33.6266	33.4627	33.5189
P49589-2	Cysteine--tRNA ligase, cytoplasmic	CARS		25.2209	25.0912	25.4917	25.3081	25.9775	25.4749	25.825	25.8784
Q9HA77	Probable cysteine--tRNA ligase, mitochondrial	CARS2		30.6362	30.3575	30.3057	30.2969	29.2307	29.8384	30.1703	30.2852
O15234	Protein CASC3	CASC3		27.1273	26.5853	27.8291	26.4994	27.1384	26.4653	27.3173	27.2106
Q6P4E1-4;Q6P4E1;Q6P4E1-2;Q6P4E1-5	Protein CASC4	CASC4		30.8479	30.6588	30.5381	30.5393	30.9427	30.5034	30.8282	30.4928
O14936;O14936-3;O14936-4;O14936-6;O14936-2;O14936-5	Peripheral plasma membrane protein CASK	CASK		31.5477	31.1724	31.5223	31.6251	31.9432	32.0518	31.0552	30.8115
Q8WXE0;Q8WXE0-2	Caskin-2	CASKIN2		28.2178	27.5189	28.8216	27.96	28.5016	27.7434	28.9897	27.7981
P29466;P29466-2;P29466-3;P29466-4	Caspase-1;Caspase-1 subunit p20;Caspase-1 subunit p10	CASP1		29.2167	28.7452	29.6408	29.1027	29.0664	28.4426	27.745	26.0688
Q92851-6;Q92851-4;Q92851-2;Q92851;Q92851-3;Q92851-5;Q92851-7	Caspase-10;Caspase-10 subunit p23/17;Caspase-10 subunit p12	CASP10		26.6385	26.2755	28.1194	27.2844	27.9217	27.5643	23.9578	25.7428
P42575;P42575-2	Caspase-2;Caspase-2 subunit p18;Caspase-2 subunit p13;Caspase-2 subunit p12	CASP2		26.7712	26.1746	26.8715	NaN	26.3703	NaN	25.9439	NaN
P42574	Caspase-3;Caspase-3 subunit p17;Caspase-3 subunit p12	CASP3		30.2551	30.4559	30.5356	30.2432	30.7453	30.5601	30.8075	30.8373
P49662;P49662-2;P49662-4	Caspase-4;Caspase-4 subunit 1;Caspase-4 subunit 2	CASP4		28.9692	29.2004	29.2839	29.4703	29.2373	29.8581	29.09	29.1748
P55212	Caspase-6;Caspase-6 subunit p18;Caspase-6 subunit p11	CASP6		29.5845	29.2419	29.3115	29.4149	29.6903	29.5131	29.0784	28.9762
P55210;P55210-3;P55210-4	Caspase-7;Caspase-7 subunit p20;Caspase-7 subunit p11	CASP7		28.9788	29.5904	29.2845	29.478	30.1272	30.1203	29.9073	30.0982
Q14790-9;Q14790;Q14790-4;Q14790-2;Q14790-3;Q14790-8;Q14790-7	Caspase-8;Caspase-8 subunit p18;Caspase-8 subunit p10	CASP8		30.0358	29.5729	29.6575	29.2919	29.2615	28.9284	29.0737	28.6656
P55211;P55211-4;P55211-2	Caspase-9;Caspase-9 subunit p35;Caspase-9 subunit p10	CASP9		24.1957	NaN	24.9162	25.0404	24.4428	25.2604	25.01	25.8244
P31415	Calsequestrin-1	CASQ1		23.8459	27.3975	27.6457	27.5904	26.757	27.5057	27.387	27.4237
P20810-6;P20810-10;P20810-7;P20810-9;P20810-5;P20810;P20810-8;P20810-2;P20810-4;P20810-3	Calpastatin	CAST		34.0964	34.4779	34.2134	34.514	34.4535	35.0358	33.9767	34.234
P04040	Catalase	CAT		33.4671	33.2117	33.81	33.4505	33.3727	33.1993	32.8096	32.4487
Q03135	Caveolin-1	CAV1		36.3211	36.789	35.7719	36.203	35.9841	36.3794	35.4328	35.9394
P51636	Caveolin-2	CAV2		31.8664	32.4322	31.8857	32.0557	32.0333	32.3853	31.4541	32.7021
Q13951-2	Core-binding factor subunit beta	CBFB		30.3655	30.1703	30.529	30.546	30.451	30.5003	30.3956	30.6094
P22681	E3 ubiquitin-protein ligase CBL	CBL		28.8802	28.3945	29.0924	28.3084	28.2461	28.7556	28.9344	28.2913
Q13191;Q13191-2;Q13191-3	E3 ubiquitin-protein ligase CBL-B	CBLB		30.3166	30.8783	30.5788	30.79	30.1794	31.6164	31.1173	31.8596
Q75N03;Q75N03-2	E3 ubiquitin-protein ligase Hakai	CBLL1		27.294	26.8963	27.6205	26.9051	27.8271	27.3347	27.8876	27.2096
P16152	Carbonyl reductase [NADPH] 1	CBR1		33.9829	34.7647	34.0185	34.7251	34.1523	34.6302	33.7244	34.4114
O75828	Carbonyl reductase [NADPH] 3	CBR3		32.5488	32.196	32.2278	32.2747	32.2287	32.4649	31.1872	32.3035
Q8N4T8;Q8N4T8-2	Carbonyl reductase family member 4	CBR4		26.1709	25.2863	25.1106	NaN	25.6774	24.8073	25.8708	25.0192
P35520;P0DN79;P35520-2	Cystathionine beta-synthase	CBS		30.2945	30.1141	30.3137	30.9025	31.1972	31.2745	30.8528	30.7263
Q8IUF1	COBW domain-containing protein 2	CBWD2		27.5667	27.52	27.4771	27.497	27.1269	26.9134	28.0682	27.7518
P83916	Chromobox protein homolog 1	CBX1		29.5241	30.2269	29.8935	30.0965	30.2108	29.906	29.9017	29.8156
Q13185	Chromobox protein homolog 3	CBX3		33.1014	31.6357	33.5394	32.1535	33.4265	32.3181	33.3177	31.6947
P45973	Chromobox protein homolog 5	CBX5		32.3315	31.784	32.3695	32.1026	32.2566	31.6442	31.9184	31.6343
O95503	Chromobox protein homolog 6	CBX6		26.9842	26.7121	27.2427	26.9002	26.1069	27.0671	26.6773	26.9872
Q9HC52	Chromobox protein homolog 8	CBX8		26.6487	26.416	27.2533	26.7833	26.8237	26.2692	27.5274	26.5868
Q9Y3M2	Protein chibby homolog 1	CBY1		22.8987	NaN	22.8347	23.3086	24.0252	NaN	23.774	NaN
Q6P1N0	Coiled-coil and C2 domain-containing protein 1A	CC2D1A		30.4531	30.5448	30.8391	30.7271	30.9455	30.804	30.9714	30.5152
Q5T0F9-2;Q5T0F9-3	Coiled-coil and C2 domain-containing protein 1B	CC2D1B		30.7913	30.6383	30.8998	30.7367	30.9333	30.3637	30.6819	30.6523
Q9P2K1;Q9P2K1-2	Coiled-coil and C2 domain-containing protein 2A	CC2D2A		24.5436	25.5104	24.3697	26.0618	26.982	25.8254	27.0848	NaN
Q8IX12;Q8IX12-2	Cell division cycle and apoptosis regulator protein 1	CCAR1		31.5503	31.6769	31.6163	31.7407	31.5948	31.5107	31.6763	31.8981
Q8N163;Q8N163-2	Cell cycle and apoptosis regulator protein 2	CCAR2		32.1278	32.2265	32.2756	32.3177	31.9928	32.5067	32.0948	32.4543
Q6UXH8;Q6UXH8-3	Collagen and calcium-binding EGF domain-containing protein 1	CCBE1		27.2368	25.9085	25.5238	25.2297	26.952	26.8231	25.8015	25.9516
Q16773;Q16773-2	Kynurenine--oxoglutarate transaminase 1	CCBL1		26.308	26.9862	26.4985	27.2619	26.3341	26.3766	26.5889	25.8382
Q6YP21;Q6YP21-3	Kynurenine--oxoglutarate transaminase 3	CCBL2		32.1342	31.7409	32.5061	31.9058	31.9862	31.9285	32.6873	31.4994
Q96ES7	SAGA-associated factor 29 homolog	CCDC101		25.0573	25.8848	25.5195	25.713	24.7765	26.1376	25.1584	24.5443
Q96A19	Coiled-coil domain-containing protein 102A	CCDC102A		28.6195	27.356	28.4545	27.7154	28.7264	26.8861	28.899	27.565
Q8IYK2	Coiled-coil domain-containing protein 105	CCDC105		25.665	26.3122	25.5059	26.4686	26.2484	27.1559	25.6713	26.1201
Q9NWR8	Calcium uniporter regulatory subunit MCUb, mitochondrial	CCDC109B		27.6419	27.1019	27.2593	27.122	27.9657	27.2343	27.5589	27.4081
Q8TBZ0;Q8TBZ0-2	Coiled-coil domain-containing protein 110	CCDC110		27.3134	28.1968	27.0791	28.0462	27.0609	NaN	26.7389	28.0297
Q96NT0;Q96NT0-2	Coiled-coil domain-containing protein 115	CCDC115		28.7968	29.1957	28.563	29.2468	28.8645	29.2542	29.0407	29.1626
Q8IWD4;Q8IWD4-2;Q8IWD4-3	Coiled-coil domain-containing protein 117	CCDC117		25.7816	NaN	26.6204	23.1217	26.236	23.2042	26.844	24.4707
Q8WUD4	Coiled-coil domain-containing protein 12	CCDC12		28.5648	28.5529	28.6732	28.4505	28.9588	28.8808	28.8482	28.9544
Q96CT7	Coiled-coil domain-containing protein 124	CCDC124		31.082	31.3915	31.6993	30.9413	31.4667	31.3723	31.5786	31.7932
Q96BQ5	Coiled-coil domain-containing protein 127	CCDC127		27.9343	27.6702	27.5125	27.7573	28.0827	27.269	27.8986	26.9327
Q96JG6;Q96JG6-3	Coiled-coil domain-containing protein 132	CCDC132		30.3643	30.0637	30.147	30.0026	30.7909	30.1821	30.8361	29.4246
Q9H6E4	Coiled-coil domain-containing protein 134	CCDC134		28.9494	28.3149	28.6819	27.9085	29.172	28.1621	28.9252	27.3348
Q6PK04	Coiled-coil domain-containing protein 137	CCDC137		NaN	26.1275	26.5654	26.8165	26.3729	26.3705	NaN	27.5039
Q6ZUS6;Q6ZUS6-5;Q6ZUS6-4;Q6ZUS6-6	Coiled-coil domain-containing protein 149	CCDC149		26.1534	25.4622	26.2334	25.8597	26.5072	25.178	25.0085	25.2284
Q9P0B6	Coiled-coil domain-containing protein 167	CCDC167		23.5684	24.7755	23.455	NaN	24.3207	NaN	24.0862	24.5731
Q5BJE1;Q5BJE1-3;Q5BJE1-2;Q5BJE1-4	Coiled-coil domain-containing protein 178	CCDC178		28.1824	29.9316	30.2008	29.5455	28.2481	30.5135	25.2816	29.4375
Q7Z3E2	Coiled-coil domain-containing protein 186	CCDC186		27.0785	25.9667	27.6945	26.8066	27.6125	26.9932	27.8852	27.253
O60826	Coiled-coil domain-containing protein 22	CCDC22		31.7357	31.8105	31.6633	31.7384	31.4765	31.4928	31.5677	31.506
Q8N300	Coiled-coil domain-containing protein 23	CCDC23		29.9499	27.1212	29.5971	28.2333	29.2392	27.7563	27.9981	27.6379
Q86WR0;Q86WR0-2	Coiled-coil domain-containing protein 25	CCDC25		29.8364	30.2854	30.1552	30.6843	29.8388	30.9104	29.9963	30.3827
Q8IWP9	Coiled-coil domain-containing protein 28A	CCDC28A		25.684	24.8611	24.6545	25.2607	25.2968	25.9236	25.7532	25.8678
Q96MW1;Q96MW1-2	Coiled-coil domain-containing protein 43	CCDC43		27.8003	28.3745	28.1079	28.7237	28.3465	28.7231	28.5983	28.2063
Q96A33;Q96A33-2	Coiled-coil domain-containing protein 47	CCDC47		32.6096	32.9793	32.507	32.7917	32.166	32.9532	32.2959	32.8515
Q8IVM0;Q8IVM0-2	Coiled-coil domain-containing protein 50	CCDC50		31.3865	31.8094	31.6195	31.45	31.194	31.1239	31.5548	31.5332
Q96ER9;Q96ER9-2	Coiled-coil domain-containing protein 51	CCDC51		28.228	27.321	27.7638	27.2924	27.5674	27.2502	28.1985	28.0829
Q9Y3C0	WASH complex subunit CCDC53	CCDC53		29.9242	29.5669	29.9629	30.1917	29.7617	30.1279	29.8092	30.0176
Q4VC31	Coiled-coil domain-containing protein 58	CCDC58		29.5707	29.6264	28.9241	30.191	29.2243	29.7386	29.4837	29.7035
Q16204	Coiled-coil domain-containing protein 6	CCDC6		32.4005	31.9052	32.3501	31.8594	32.0502	31.9312	32.4419	31.8906
Q8N9Z2	Coiled-coil domain-containing protein 71L	CCDC71L		26.6656	29.7256	27.9759	25.4023	27.8548	27.5894	26.7347	26.2813
Q76M96;Q76M96-2	Coiled-coil domain-containing protein 80	CCDC80		30.4131	30.001	30.0512	30.1651	29.6162	29.9669	29.8069	30.253
Q9H6F5	Coiled-coil domain-containing protein 86	CCDC86		28.297	28.9042	27.612	28.8039	28.3542	28.495	29.6655	29.1937
Q3V6T2;Q3V6T2-2	Girdin	CCDC88A		31.0765	31.0545	30.8202	30.5227	30.6262	30.9624	30.8138	30.5889
Q9Y3X0	Coiled-coil domain-containing protein 9	CCDC9		29.7287	30.0869	30.0352	30.2273	30.1567	30.6147	30.2958	30.2728
Q9GZT6;Q9GZT6-2;Q9GZT6-3	Coiled-coil domain-containing protein 90B, mitochondrial	CCDC90B		29.5766	29.6555	29.5365	29.5479	29.3234	29.1904	29.8582	29.4184
Q7Z6B0;Q7Z6B0-2;Q7Z6B0-3	Coiled-coil domain-containing protein 91	CCDC91		28.5724	28.2098	29.2296	28.896	29.1077	28.1475	28.8369	28.0569
Q53HC0;Q53HC0-2	Coiled-coil domain-containing protein 92	CCDC92		28.5313	28.1566	28.9047	27.8073	28.3674	29.1008	27.635	27.2319
Q567U6	Coiled-coil domain-containing protein 93	CCDC93		32.2813	31.748	31.9124	31.5437	31.8601	31.5941	31.6204	31.4448
Q9BW85	Coiled-coil domain-containing protein 94	CCDC94		26.4582	26.9104	28.513	26.7672	27.1849	26.4992	26.552	27.1832
Q96F63	Coiled-coil domain-containing protein 97	CCDC97		26.813	27.458	26.8278	27.9325	26.2217	27.7453	26.8709	26.4902
Q9BSQ5;Q9BSQ5-2;Q9BSQ5-4;Q9BSQ5-3	Cerebral cavernous malformations 2 protein	CCM2		27.7729	27.7175	27.8978	27.4636	28.0262	28.1108	28.1634	27.9688
P20248	Cyclin-A2	CCNA2		NaN	24.6976	NaN	25.0152	25.0145	25.717	24.9986	24.5558
P24385	G1/S-specific cyclin-D1	CCND1		30.3497	31.2699	30.0803	30.2786	30.3473	31.2103	29.2046	29.6821
O95273;O95273-2	Cyclin-D1-binding protein 1	CCNDBP1		25.736	26.2598	25.7023	26.7432	26.3077	25.7057	25.8227	25.4814
P51946	Cyclin-H	CCNH		28.0234	27.0932	28.4541	27.4438	28.8602	28.1261	29.2062	28.1857
O75909;O75909-4;O75909-1;O75909-2	Cyclin-K	CCNK		28.4356	28.1757	28.5515	27.9231	28.7946	27.5113	28.6479	28.2354
Q9UK58;Q9UK58-6;Q9UK58-4	Cyclin-L1	CCNL1		26.4438	25.8036	26.3675	25.8167	26.1525	25.9964	26.6881	26.1058
Q96S94;Q96S94-3	Cyclin-L2	CCNL2		24.5917	25.2491	24.8966	NaN	25.1926	24.2035	26.4441	25.3869
O60563	Cyclin-T1	CCNT1		26.7465	28.1503	27.0765	27.7925	26.9209	27.7136	26.8061	29.6199
Q8ND76;Q8ND76-2;Q8ND76-3	Cyclin-Y	CCNY		29.4088	29.2365	28.7837	28.8519	28.4953	28.5498	28.3366	28.4373
Q8N7R7;Q8N7R7-3;Q8N7R7-2	Cyclin-Y-like protein 1	CCNYL1		28.4396	28.3779	28.2886	28.1046	29.13	28.5648	29.175	28.9937
Q9ULG6-5;Q9ULG6;Q9ULG6-2	Cell cycle progression protein 1	CCPG1		28.5113	28.8418	28.8438	29.286	29.0728	29.3286	29.2416	29.2276
Q9UK39	Nocturnin	CCRN4L		25.3357	NaN	26.5002	25.4149	26.8903	25.1694	28.988	26.6697
O14618	Copper chaperone for superoxide dismutase	CCS		29.9863	30.1755	29.9488	29.777	29.9229	30.1332	29.9037	29.3068
Q4G0I0	Protein CCSMST1	CCSMST1		26.0622	25.0851	26.2479	25.9112	26.1026	25.5682	25.8853	24.9698
P78371;P78371-2	T-complex protein 1 subunit beta	CCT2		35.0219	35.5777	34.9006	35.5497	34.9379	35.5966	34.7278	35.6092
P49368;P49368-2	T-complex protein 1 subunit gamma	CCT3		35.2329	35.4469	35.2139	35.5726	35.1843	35.6647	35.1257	35.8552
P50991;P50991-2	T-complex protein 1 subunit delta	CCT4		34.6741	35.1752	34.62	35.1113	34.6682	35.056	34.6775	35.2975
P48643;P48643-2	T-complex protein 1 subunit epsilon	CCT5		34.9274	35.014	35.0751	35.3344	34.9886	35.3341	34.8956	35.4795
P40227;P40227-2	T-complex protein 1 subunit zeta	CCT6A		34.9355	35.0699	35.2841	35.0272	35.4077	34.9369	35.2161	34.9098
Q92526;Q92526-2;Q92526-3	T-complex protein 1 subunit zeta-2	CCT6B		NaN	30.2367	NaN	29.2405	28.9588	29.2639	26.3816	30.225
Q99832;Q99832-3;Q99832-4;Q99832-2	T-complex protein 1 subunit eta	CCT7		34.9334	35.0949	34.7307	35.1734	34.839	34.8419	34.6624	35.202
P50990;P50990-2;P50990-3	T-complex protein 1 subunit theta	CCT8		35.3515	35.6607	35.5202	35.638	35.2353	35.6709	35.2783	35.9362
P86791;P86790	Vacuolar fusion protein CCZ1 homolog;Vacuolar fusion protein CCZ1 homolog B	CCZ1;CCZ1B		30.6914	30.6073	30.015	30.8284	30.5224	30.6475	30.4562	30.3227
Q6YHK3;Q6YHK3-4;Q6YHK3-2	CD109 antigen	CD109		34.4202	33.9298	34.3303	33.9596	34.7305	34.7782	33.4734	33.7687
P48509	CD151 antigen	CD151		32.401	33.1353	31.545	33.3425	31.7394	33.2729	30.4955	33.4741
Q9HCU0	Endosialin	CD248		31.31	30.4576	31.4996	30.57	30.5247	30.7424	31.2137	30.8607
Q9NZQ7;Q9NZQ7-3;Q9NZQ7-2	Programmed cell death 1 ligand 1	CD274		25.1531	NaN	27.7053	25.5999	25.6544	23.2205	25.3643	NaN
Q5ZPR3;Q5ZPR3-4;Q5ZPR3-2;Q5ZPR3-3	CD276 antigen	CD276		32.9282	33.2464	32.2853	32.6007	32.8999	33.1892	32.8835	33.3817
Q9Y5K6	CD2-associated protein	CD2AP		30.5347	30.6237	30.8136	31.1115	30.919	31.2154	30.8518	31.217
O95400	CD2 antigen cytoplasmic tail-binding protein 2	CD2BP2		28.1047	28.7082	28.543	29.0458	28.9395	28.5078	28.8978	28.7464
P28906;P28906-2	Hematopoietic progenitor cell antigen CD34	CD34		27.1627	24.6985	25.6683	22.6739	25.6456	NaN	23.9568	NaN
P16671;P16671-4;P16671-2;P16671-3	Platelet glycoprotein 4	CD36		24.1647	24.4897	25.6669	24.5721	25.8114	26.4716	24.7551	NaN
O15446;O15446-2	DNA-directed RNA polymerase I subunit RPA34	CD3EAP		27.0683	27.6071	27.5948	27.671	27.1998	27.7861	28.451	28.6975
P16070-14;P16070-13;P16070-12;P16070-10;P16070-8;P16070;P16070-18;P16070-11;P16070-17;P16070-6;P16070-4;P16070-7;P16070-5;P16070-16;P16070-3	CD44 antigen	CD44		35.5329	35.7255	35.504	35.5957	35.2495	35.5649	34.6043	35.3423
P15529;P15529-15;P15529-12;P15529-14;P15529-11;P15529-13;P15529-10;P15529-9;P15529-8	Membrane cofactor protein	CD46		28.7722	30.679	27.8797	30.3475	29.4606	30.5061	28.9118	30.3631
Q08722;Q08722-3;Q08722-4;Q08722-2	Leukocyte surface antigen CD47	CD47		31.4221	31.4952	30.8245	31.2921	30.986	31.6839	31.1186	31.683
P08174;P08174-2;P08174-4;P08174-3;P08174-5;P08174-6;P08174-7	Complement decay-accelerating factor	CD55		30.2581	30.772	29.6568	29.7885	29.8812	30.2527	30.6485	30.8855
P19256-3;P19256;P19256-2	Lymphocyte function-associated antigen 3	CD58		28.1461	27.5639	27.7709	27.6787	28.0919	27.7238	28.7466	27.9334
P13987	CD59 glycoprotein	CD59		35.5087	35.1276	35.3962	34.9573	35.5036	35.5076	35.3817	34.8898
P08962;P08962-2;P08962-3	CD63 antigen	CD63	1	34.1117	33.8095	33.8554	33.6976	34.3048	33.7728	34.3861	33.6183
P60033	CD81 antigen	CD81		34.5119	34.2982	34.0921	34.0613	34.5698	34.1457	33.7965	33.6639
P27701;P27701-2	CD82 antigen	CD82		28.1684	28.5305	28.2148	28.065	28.524	28.2275	27.8216	26.5504
P21926	CD9 antigen	CD9		30.9475	30.3379	30.9466	30.3758	30.9929	30.2732	30.687	30.347
P48960;P48960-2;P48960-3	CD97 antigen;CD97 antigen subunit alpha;CD97 antigen subunit beta	CD97		31.4393	31.5072	31.4764	31.431	31.7754	31.8611	32.2178	32.1058
P14209;P14209-2;P14209-3	CD99 antigen	CD99		34.0906	34.2212	34.3821	34.3834	34.6327	35.311	34.1429	34.7041
Q8TCZ2;Q8TCZ2-3;Q8TCZ2-2;Q8TCZ2-5;Q8TCZ2-6	CD99 antigen-like protein 2	CD99L2		31.063	31.0983	30.6459	31.1998	30.9799	31.3522	31.004	31.1562
P32320	Cytidine deaminase	CDA		29.1063	27.9465	29.1132	29.0073	27.9081	26.7686	26.8011	25.6463
Q8IWY9;Q8IWY9-1	Codanin-1	CDAN1		27.0287	25.4128	26.8808	24.9952	26.1936	25.7857	25.2557	24.9767
O75794	Cell division cycle protein 123 homolog	CDC123		28.696	28.6024	28.6567	28.6655	28.741	28.4457	29.583	28.5464
Q13042;Q13042-2;Q13042-4;Q13042-3	Cell division cycle protein 16 homolog	CDC16		30.1571	30.2661	30.1322	30.472	29.8624	30.2495	29.8999	30.4362
Q9UJX2;Q9UJX2-3	Cell division cycle protein 23 homolog	CDC23		29.9735	30.3265	29.9873	30.3812	29.9862	30.2526	29.9704	30.3473
Q8NHZ8	Anaphase-promoting complex subunit CDC26	CDC26		28.8556	27.6781	28.6961	27.9642	29.1399	28.4242	29.312	28.3184
P30260;P30260-2	Cell division cycle protein 27 homolog	CDC27		29.3172	29.6897	29.5527	29.0906	29.6945	29.262	29.8794	29.1627
P49427	Ubiquitin-conjugating enzyme E2 R1	CDC34		28.6414	27.8121	27.6039	27.5162	26.638	27.0758	27.9498	26.8154
Q16543	Hsp90 co-chaperone Cdc37;Hsp90 co-chaperone Cdc37, N-terminally processed	CDC37		33.2586	33.8307	33.7934	33.7636	33.358	33.9731	33.4671	33.32
Q7L3B6	Hsp90 co-chaperone Cdc37-like 1	CDC37L1		29.2273	30.5007	29.3475	30.0879	29.3373	29.8407	29.2899	30.2359
O60508	Pre-mRNA-processing factor 17	CDC40		29.2369	29.0087	29.358	29.2145	29.4686	28.8994	29.979	29.14
P60953;P60953-1	Cell division control protein 42 homolog	CDC42		33.6678	33.9984	33.5139	33.7254	33.8601	33.8614	33.5199	33.8248
Q5VT25;Q5VT25-2;Q5VT25-4	Serine/threonine-protein kinase MRCK alpha	CDC42BPA		31.5824	31.6883	31.5696	31.9085	31.8066	31.7453	31.9551	31.9865
Q9Y5S2	Serine/threonine-protein kinase MRCK beta	CDC42BPB		33.0564	33.1295	33.0831	33.4418	32.9816	33.078	32.9383	33.0264
Q00587;Q00587-2	Cdc42 effector protein 1	CDC42EP1		31.0208	31.5154	31.3117	31.4402	30.9373	31.6397	31.6751	31.5925
O14613	Cdc42 effector protein 2	CDC42EP2		30.6003	30.5336	30.4336	30.4939	30.3458	29.8597	30.0066	29.94
Q9UKI2	Cdc42 effector protein 3	CDC42EP3		29.3218	29.5632	29.756	29.5178	29.4672	30.4298	29.8855	30.0107
Q9H3Q1;Q9H3Q1-2	Cdc42 effector protein 4	CDC42EP4		29.7881	29.6548	30.1117	29.938	30.0176	30.0894	29.7908	29.2843
Q6NZY7	Cdc42 effector protein 5	CDC42EP5		28.076	26.2322	27.939	26.7384	27.7158	26.5407	27.5814	26.287
Q9NRR3	CDC42 small effector protein 2	CDC42SE2		25.0833	24.7879	25.6884	26.2542	25.7736	26.6525	27.2879	26.3066
Q99459	Cell division cycle 5-like protein	CDC5L		33.125	32.7684	33.105	32.7906	33.2947	32.5821	33.4627	32.8305
Q6P1J9	Parafibromin	CDC73		28.8888	29.6858	29.4896	29.8347	29.1799	29.6903	29.2664	29.562
Q99618	Cell division cycle-associated protein 3	CDCA3		24.2803	23.9455	24.7638	23.5449	24.1504	NaN	24.434	NaN
P55287;P55287-2	Cadherin-11	CDH11		31.2602	31.1608	31.2097	31.3598	31.4924	31.4744	32.0096	32.2971
P55290-4;P55290;P55290-5	Cadherin-13	CDH13		32.0975	30.1195	31.868	30.8204	32.4143	32.3901	32.377	32.3686
P19022;P19022-2	Cadherin-2	CDH2		30.7807	30.3996	30.9036	31.0785	30.6481	30.6147	30.8893	31.0194
P55285	Cadherin-6	CDH6		23.5581	NaN	24.7148	23.4116	NaN	NaN	26.3392	24.8364
O14735;O14735-3;O14735-2	CDP-diacylglycerol--inositol 3-phosphatidyltransferase	CDIPT		30.7702	30.9451	30.916	31.018	30.6049	30.3731	30.3524	30.3282
P06493;P06493-2	Cyclin-dependent kinase 1	CDK1		28.6911	29.6846	30.1193	29.6097	29.2017	29.4756	29.454	28.6563
P21127;P21127-2;P21127-8;P21127-3;P21127-9;P21127-6;P21127-10;Q9UQ88-9	Cyclin-dependent kinase 11B;Cyclin-dependent kinase 11A	CDK11B;CDK11A		30.3348	29.596	30.3812	30.5897	30.4368	29.4875	30.6974	29.9671
Q9NYV4;Q9NYV4-2;Q9NYV4-3	Cyclin-dependent kinase 12	CDK12		30.5921	30.8056	30.8815	30.5675	30.5281	30.9822	30.9835	30.9156
Q14004-2;Q14004	Cyclin-dependent kinase 13	CDK13		27.7557	26.8522	28.2871	26.9387	27.2523	27.2033	28.5342	26.6207
O94921;O94921-3;O94921-2	Cyclin-dependent kinase 14	CDK14		27.7295	26.5906	26.7953	25.6973	27.5276	26.7494	26.0794	NaN
Q00536;Q00536-2;Q00536-3	Cyclin-dependent kinase 16	CDK16		27.2078	27.1186	27.3936	26.4975	27.4664	27.151	26.899	27.2528
Q00537;Q00537-2	Cyclin-dependent kinase 17	CDK17		28.4946	28.1383	29.2608	28.5379	29.2901	29.3558	29.3682	28.7726
Q9BWU1;Q9BWU1-2	Cyclin-dependent kinase 19	CDK19		25.9904	25.5771	26.2778	25.6452	25.2295	NaN	25.8149	24.9014
P24941;P24941-2	Cyclin-dependent kinase 2	CDK2		26.9565	28.7387	29.5702	28.4356	27.625	28.2698	28.6011	28.5859
Q00526	Cyclin-dependent kinase 3	CDK3		32.3626	28.7008	32.2079	29.5081	33.4385	32.0735	33.638	30.0537
P11802;P11802-2	Cyclin-dependent kinase 4	CDK4		31.1643	30.8858	31.0979	30.4539	30.797	30.7388	30.5071	29.9289
Q00535;Q00535-2	Cyclin-dependent-like kinase 5	CDK5		29.4802	29.7544	29.4456	29.5686	29.0864	29.9017	29.046	29.6422
Q96JB5;Q96JB5-4;Q96JB5-2;Q96JB5-3	CDK5 regulatory subunit-associated protein 3	CDK5RAP3		31.2647	31.6597	30.9596	31.5464	30.923	31.3431	30.7595	31.2015
Q00534	Cyclin-dependent kinase 6	CDK6		29.2362	28.7295	29.005	28.4755	30.0646	28.7528	29.9361	28.8374
P50613	Cyclin-dependent kinase 7	CDK7		28.124	26.8939	27.3271	27.2019	26.7627	27.139	28.5422	28.8045
P50750;P50750-2	Cyclin-dependent kinase 9	CDK9		28.2708	28.0498	28.4795	28.343	28.2011	28.3222	28.8085	28.483
Q5VV42;Q5VV42-2	Threonylcarbamoyladenosine tRNA methylthiotransferase	CDKAL1		28.1727	27.2829	28.6803	27.3419	27.6879	26.9568	27.9028	26.7498
P38936	Cyclin-dependent kinase inhibitor 1	CDKN1A		26.9977	28.7806	28.0234	29.2029	27.7	29.0864	26.9184	28.6563
P46527	Cyclin-dependent kinase inhibitor 1B	CDKN1B		25.0566	25.661	24.9778	26.3894	24.8366	25.053	25.0957	26.1219
P42771;P42771-4;P42771-2	Cyclin-dependent kinase inhibitor 2A	CDKN2A		30.3663	30.9416	27.4444	27.9715	27.2948	27.8277	29.2209	30.072
Q9NXV6	CDKN2A-interacting protein	CDKN2AIP		28.7393	29.1315	29.183	29.5708	29.2132	29.0529	29.0984	29.0999
Q96HQ2;Q96HQ2-2	CDKN2AIP N-terminal-like protein	CDKN2AIPNL		27.2967	27.302	27.8545	27.957	27.7797	27.7112	27.5589	28.1411
P42773	Cyclin-dependent kinase 4 inhibitor C	CDKN2C		NaN	28.2329	25.9959	28.6608	27.8161	29.0402	26.6702	28.4705
Q4KMG0;Q4KMG0-2	Cell adhesion molecule-related/down-regulated by oncogenes	CDON		29.9835	30.2754	29.3834	27.0303	27.8854	28.0188	NaN	NaN
Q01850	Cerebellar degeneration-related protein 2	CDR2		29.5437	29.14	29.4215	29.2021	29.8908	29.3014	30.2525	29.6024
Q86X02	Cerebellar degeneration-related protein 2-like	CDR2L		28.2474	28.4663	28.764	28.9714	29.015	29.375	28.6644	28.9298
O95674	Phosphatidate cytidylyltransferase 2	CDS2		29.5015	29.5883	30.1677	29.4776	29.9136	30.1643	29.9841	29.6189
Q9UKY7;Q9UKY7-2	Protein CDV3 homolog	CDV3		32.3667	32.6053	32.6943	33.1605	32.5774	32.7574	32.4857	32.4588
Q9Y232-2;Q9Y232;Q9Y232-4;Q9Y232-3	Chromodomain Y-like protein	CDYL		27.1176	26.8124	28.0704	26.9809	27.4527	26.748	27.8289	26.929
P17676;P17676-2	CCAAT/enhancer-binding protein beta	CEBPB		29.3572	28.8637	27.9433	28.6952	27.0183	28.9923	26.622	28.1348
P49716	CCAAT/enhancer-binding protein delta	CEBPD		24.799	25.2793	26.3757	26.0198	25.7353	26.0279	25.2915	25.3767
Q03701	CCAAT/enhancer-binding protein zeta	CEBPZ		29.8588	29.7247	29.9825	29.7703	29.6519	29.2521	29.6046	29.5835
Q9BXW7;Q9BXW7-2	Cat eye syndrome critical region protein 5	CECR5		29.2848	29.8227	28.8611	29.1539	29.5541	29.9393	29.159	28.9233
Q92879;Q92879-2;Q92879-3;Q92879-6;Q92879-5	CUGBP Elav-like family member 1	CELF1		30.5495	30.9685	31.0103	31.4056	30.5977	31.3433	30.876	31.5275
Q92879-4	CUGBP Elav-like family member 1	CELF1		27.1601	25.1418	27.566	26.2782	27.1835	26.8688	27.5528	27.4402
O95319;O95319-5;O95319-2;O95319-4;O95319-3	CUGBP Elav-like family member 2	CELF2		29.6288	29.3747	29.0417	29.4707	28.4978	30.2253	29.6069	29.8489
Q8WUJ3;Q8WUJ3-2	Cell migration-inducing and hyaluronan-binding protein	CEMIP		32.035	33.5677	32.8434	33.8779	32.3082	32.9564	32.8013	33.1235
Q8N111	Cell cycle exit and neuronal differentiation protein 1	CEND1		28.3893	27.8307	26.2064	25.9782	25.9172	25.9719	25.8126	25.279
Q03188;Q03188-2	Centromere protein C	CENPC		26.7249	27.6988	27.7359	26.4351	26.6787	27.2595	26.4117	26.2638
P49454	Centromere protein F	CENPF		28.0579	28.0284	27.8136	27.9246	27.6901	28.1106	27.6909	27.2862
Q7Z7K6;Q7Z7K6-3;Q7Z7K6-2	Centromere protein V	CENPV		25.5375	NaN	25.2798	25.2677	26.2286	NaN	27.0639	26.6823
Q8N8E3	Centrosomal protein of 112 kDa	CEP112		25.8923	25.8948	26.3387	25.8501	25.2579	27.5104	25.428	26.0513
Q8N960;Q8N960-2	Centrosomal protein of 120 kDa	CEP120		24.3595	25.4211	24.3164	25.7155	24.3956	NaN	24.1416	24.2803
Q9UPN4;Q9UPN4-2;Q9UPN4-3	Centrosomal protein of 131 kDa	CEP131		26.6775	26.6615	27.5352	26.9762	26.6732	26.8769	25.8399	26.3819
Q66GS9	Centrosomal protein of 135 kDa	CEP135		27.7233	27.0594	27.5177	27.2695	27.6782	27.5635	27.628	27.5661
Q5SW79	Centrosomal protein of 170 kDa	CEP170		33.5079	33.4735	33.5749	33.209	32.9898	33.058	33.0907	33.2326
Q5SW79-3	Centrosomal protein of 170 kDa	CEP170		27.2421	26.8517	27.6154	25.9923	27.2642	26.687	27.3967	27.4522
Q5SW79-2	Centrosomal protein of 170 kDa	CEP170		26.5521	26.6803	27.26	27.2013	26.3051	NaN	26.1475	26.8006
Q9Y4F5;Q9Y4F5-2;Q9Y4F5-3	Centrosomal protein of 170 kDa protein B	CEP170B		29.6159	29.3279	29.7021	29.3917	29.5488	29.5134	29.3986	29.2823
Q9BV73;Q9BV73-2	Centrosome-associated protein CEP250	CEP250		28.8548	28.8066	28.8022	28.5121	29.3727	28.5472	29.6098	29.6763
Q5VT06	Centrosome-associated protein 350	CEP350		28.4392	29.5644	28.731	29.2644	29.1382	29.6287	28.8744	28.8665
Q9BYV8;Q9BYV8-2;Q9BYV8-5	Centrosomal protein of 41 kDa	CEP41		29.6179	28.9944	30.0471	28.995	29.7824	28.7687	29.598	28.7716
Q9C0F1;Q9C0F1-2	Centrosomal protein of 44 kDa	CEP44		27.387	28.4519	27.7608	27.6621	28.0309	26.7821	28.3109	26.8507
Q53EZ4;Q53EZ4-2	Centrosomal protein of 55 kDa	CEP55		26.3601	26.9442	26.6873	26.4979	26.696	27.1745	26.1376	26.3642
Q76N32;Q76N32-2	Centrosomal protein of 68 kDa	CEP68		26.4322	26.3417	25.7613	25.8079	26.7349	25.2249	23.9456	24.9578
Q96ST8;Q96ST8-2	Centrosomal protein of 89 kDa	CEP89		28.1225	27.8128	27.9925	27.6793	27.8743	27.6639	28.1346	26.945
Q8IW35;Q8IW35-2	Centrosomal protein of 97 kDa	CEP97		28.7998	28.2463	29.2808	28.2251	29.0794	27.6961	29.3653	27.9371
Q9Y6K0	Choline/ethanolaminephosphotransferase 1	CEPT1		27.8392	27.8124	27.7334	28.1855	27.4447	27.6742	26.7725	27.6806
Q5T4B2;Q5T4B2-2	Probable inactive glycosyltransferase 25 family member 3	CERCAM		31.473	31.1328	31.3897	30.5905	31.9256	31.1717	31.5364	30.5502
Q96G23	Ceramide synthase 2	CERS2		30.2789	30.6905	30.2719	29.6662	30.3557	30.8927	30.7892	30.5198
Q8N5B7;Q8N5B7-2	Ceramide synthase 5	CERS5		27.2728	28.0411	27.8278	27.9352	28.0887	27.6429	27.9243	28.5357
Q6ZMG9;Q6ZMG9-2	Ceramide synthase 6	CERS6		24.8828	23.8715	25.9717	23.6662	26.8529	23.1077	25.6708	24.1037
P23141;P23141-3;P23141-2	Liver carboxylesterase 1	CES1		NaN	28.134	28.4122	29.6159	21.8194	NaN	24.1262	23.2603
O00748;O00748-2	Cocaine esterase	CES2		29.8786	28.7864	29.1983	28.0292	29.9783	27.6079	28.5165	27.7622
P41208	Centrin-2	CETN2		28.3284	29.221	28.497	29.5592	29.3018	29.2666	28.3005	28.759
O15182	Centrin-3	CETN3		26.1501	24.4756	26.9976	25.5424	26.5863	25.0777	26.2226	23.9423
Q9Y6A4	Cilia- and flagella-associated protein 20	CFAP20		30.0955	29.8116	29.634	29.606	29.73	29.4842	29.4279	28.886
Q96G28;Q96G28-2	Cilia- and flagella-associated protein 36	CFAP36		29.6379	28.3765	29.596	29.0776	29.4569	29.6306	29.6649	29.1157
Q9P2B7;Q9P2B7-2	Cilia- and flagella-associated protein 97	CFAP97		25.3238	26.4132	25.0225	26.3171	25.707	27.7862	25.6282	26.6671
Q9UEE9;Q9UEE9-2	Craniofacial development protein 1	CFDP1		30.2852	29.1172	30.3102	28.4635	30.226	29.1207	30.1628	28.7254
P23528	Cofilin-1	CFL1		36.6538	36.7951	36.9017	37.0578	36.7535	37.3113	37.1163	37.2803
Q9Y281;Q9Y281-3	Cofilin-2	CFL2		33.6688	34.0046	33.8187	34.3307	34.1193	34.7483	34.0544	34.3994
Q9UFW8	CGG triplet repeat-binding protein 1	CGGBP1		29.1868	27.9567	29.3995	27.8627	29.6044	27.7415	29.0936	28.1489
Q0VF96;Q0VF96-2	Cingulin-like protein 1	CGNL1		24.7027	NaN	24.5993	24.2158	25.0078	23.9538	25.348	NaN
Q13111;Q13111-3;Q13111-2	Chromatin assembly factor 1 subunit A	CHAF1A		24.1962	26.0439	26.362	25.2848	26.7087	25.1504	24.5343	25.8873
Q13112	Chromatin assembly factor 1 subunit B	CHAF1B		24.434	25.6494	25.4874	25.1257	25.217	25.3582	25.573	25.4072
Q96JM3	Chromosome alignment-maintaining phosphoprotein 1	CHAMP1		29.2339	29.3502	29.2879	29.6573	29.9717	29.564	29.7357	29.2003
Q96BP2	Coiled-coil-helix-coiled-coil-helix domain-containing protein 1	CHCHD1		26.797	26.1713	27.5764	26.7807	26.8012	26.0091	27.6251	26.8021
Q9Y6H1;Q5T1J5	Coiled-coil-helix-coiled-coil-helix domain-containing protein 2;Putative coiled-coil-helix-coiled-coil-helix domain-containing protein CHCHD2P9, mitochondrial	CHCHD2;CHCHD2P9		30.8641	30.4344	30.1708	30.2326	30.2075	30.2968	30.6654	30.4984
Q9NX63	MICOS complex subunit MIC19	CHCHD3		33.3089	32.1799	33.0332	32.2283	33.3008	32.6118	33.2957	31.9527
Q8N4Q1;Q8N4Q1-2	Mitochondrial intermembrane space import and assembly protein 40	CHCHD4		29.4488	28.9268	28.9723	29.524	29.1077	28.9333	29.4698	29.38
Q9BSY4;Q9BSY4-2	Coiled-coil-helix-coiled-coil-helix domain-containing protein 5	CHCHD5		27.3396	26.9728	27.505	27.7588	27.5427	27.4523	26.7183	26.9833
Q9BRQ6	MICOS complex subunit MIC25	CHCHD6		28.9739	28.2196	28.6346	28.264	28.987	29.0387	28.3546	28.2145
Q9BUK0;Q9BUK0-2;Q9BUK0-4	Coiled-coil-helix-coiled-coil-helix domain-containing protein 7	CHCHD7		25.8874	25.9646	25.782	24.7366	25.7598	25.5348	25.9944	25.6029
O14646;O14646-2	Chromodomain-helicase-DNA-binding protein 1	CHD1		27.8519	28.2104	28.2987	28.3043	27.9515	29.0802	28.422	28.0848
Q86WJ1;Q86WJ1-2;Q86WJ1-4;Q86WJ1-3;Q86WJ1-5	Chromodomain-helicase-DNA-binding protein 1-like	CHD1L		27.8634	28.2982	28.222	27.0226	28.8431	27.9082	29.765	28.4625
O14647;O14647-2	Chromodomain-helicase-DNA-binding protein 2	CHD2		28.8054	28.7413	28.7419	28.6555	28.7746	28.7714	28.9142	28.8639
Q12873;Q12873-3;Q12873-2	Chromodomain-helicase-DNA-binding protein 3	CHD3		29.1381	28.4854	29.4507	28.7597	29.4466	29.2869	29.4353	28.9101
Q14839;Q14839-2	Chromodomain-helicase-DNA-binding protein 4	CHD4		32.0802	32.3401	32.2826	32.2742	32.0799	32.2813	32.0503	32.3159
Q9HCK8;Q9HCK8-2	Chromodomain-helicase-DNA-binding protein 8	CHD8		27.4608	27.389	27.7102	27.7297	27.5564	27.9166	28.0882	26.5563
Q8NE62	Choline dehydrogenase, mitochondrial	CHDH		26.864	28.3621	24.8455	26.7388	24.3799	27.0156	NaN	NaN
O96017;O96017-9;O96017-13;O96017-4;O96017-12	Serine/threonine-protein kinase Chk2	CHEK2		26.7107	25.866	26.9118	24.4142	26.2673	24.6001	25.8434	23.7932
Q8IWX8	Calcium homeostasis endoplasmic reticulum protein	CHERP		30.0484	30.0176	30.2625	29.9285	30.2554	30.1361	29.9756	30.5147
Q9BWS9;Q9BWS9-2;Q9BWS9-3	Chitinase domain-containing protein 1	CHID1		30.2192	30.7693	30.184	30.1464	30.4576	30.4975	29.9817	29.1068
P35790;P35790-2	Choline kinase alpha	CHKA		26.5338	25.7313	25.8584	25.8591	26.4748	25.5133	26.518	25.4686
Q9Y259	Choline/ethanolamine kinase	CHKB		27.9728	27.864	27.166	28.0249	27.7867	29.0591	26.9696	27.6176
P24386	Rab proteins geranylgeranyltransferase component A 1	CHM		29.1706	29.6769	29.3803	29.3103	29.312	29.3328	29.5695	29.8926
P26374	Rab proteins geranylgeranyltransferase component A 2	CHML		NaN	24.0092	26.4941	NaN	25.0462	NaN	27.6432	25.1565
Q9HD42	Charged multivesicular body protein 1a	CHMP1A		30.6101	31.5318	30.4983	30.3466	30.6758	31.2577	30.4502	30.5236
Q7LBR1	Charged multivesicular body protein 1b	CHMP1B		31.5541	33.0843	31.0371	32.9707	31.2131	32.266	31.0262	32.2298
O43633	Charged multivesicular body protein 2a	CHMP2A		30.5415	30.5897	31.0036	30.917	30.7124	31.0131	30.506	30.3842
Q9UQN3;Q9UQN3-2	Charged multivesicular body protein 2b	CHMP2B		29.4099	30.3098	29.6389	30.7465	29.4723	30.4695	29.5812	29.5129
Q9Y3E7;Q9Y3E7-3;Q9Y3E7-4;Q9Y3E7-2	Charged multivesicular body protein 3	CHMP3		30.4963	30.895	30.1636	30.6066	30.0385	30.6927	30.3743	30.6735
Q9BY43;Q9BY43-2	Charged multivesicular body protein 4a	CHMP4A		31.1166	30.5747	31.1396	30.7437	30.4051	30.7471	30.6586	30.8441
Q9H444	Charged multivesicular body protein 4b	CHMP4B		32.4397	33.2025	32.4576	33.3204	32.6153	33.2348	32.5885	32.4781
Q9NZZ3;Q9NZZ3-2	Charged multivesicular body protein 5	CHMP5		31.114	30.5305	31.1582	30.7573	31.1315	30.7663	31.0048	31.268
Q96FZ7	Charged multivesicular body protein 6	CHMP6		30.7947	32.0457	30.1588	31.3144	30.4922	31.3321	31.1652	31.3182
Q8WUX9	Charged multivesicular body protein 7	CHMP7		28.4767	27.7896	29.0112	27.6568	28.9569	28.0642	28.9739	27.4622
Q9UHD1;Q9UHD1-2	Cysteine and histidine-rich domain-containing protein 1	CHORDC1		32.3493	32.4821	32.64	32.4276	32.4853	32.3739	32.5841	32.3606
Q99653	Calcineurin B homologous protein 1	CHP1		30.4303	29.5946	30.0226	30.4187	29.3471	30.3363	29.7784	29.6715
Q8IZ52;Q8IZ52-4;Q8IZ52-2	Chondroitin sulfate synthase 2	CHPF		27.9412	27.2783	27.8609	27.1953	28.009	27.5956	27.8365	28.4622
Q9P2E5;Q9P2E5-2	Chondroitin sulfate glucuronyltransferase	CHPF2		28.6622	28.4741	28.6289	27.4888	28.0646	28.2336	28.5317	27.9407
Q8WUD6;Q8WUD6-2	Cholinephosphotransferase 1	CHPT1		26.6561	27.0361	26.8744	27.5122	27.4297	27.5997	27.2003	27.319
Q9NRG0	Chromatin accessibility complex protein 1	CHRAC1		27.1529	26.0179	27.4545	25.9048	27.261	25.9261	26.9916	25.8602
P08172	Muscarinic acetylcholine receptor M2	CHRM2		27.4279	29.1478	25.1335	25.7586	NaN	24.4835	NaN	22.7883
Q9NRB3	Carbohydrate sulfotransferase 12	CHST12		25.9767	26.9465	25.5305	26.1258	26.4401	26.5322	25.9497	25.5774
Q8NCH0	Carbohydrate sulfotransferase 14	CHST14		29.7511	29.0542	29.9693	29.2747	30.0811	29.0538	29.3999	29.1324
Q7LGC8	Carbohydrate sulfotransferase 3	CHST3		25.1673	24.556	26.085	25.844	26.3054	NaN	26.4826	25.0345
Q86X52	Chondroitin sulfate synthase 1	CHSY1		25.966	25.3965	26.4219	25.6724	26.817	26.4663	27.7062	27.4013
Q9Y3Y2;Q9Y3Y2-4;Q9Y3Y2-3	Chromatin target of PRMT1 protein	CHTOP		31.0446	29.9351	31.3736	30.2076	31.0132	29.9304	30.9979	30.1172
O15111	Inhibitor of nuclear factor kappa-B kinase subunit alpha	CHUK		28.5482	28.878	28.3365	28.7529	28.4761	28.6508	28.6871	28.172
Q8WUH1;Q8WUH1-2	Protein Churchill	CHURC1		27.1396	27.044	27.5546	27.759	28.8677	28.4855	28.752	28.182
O76071	Probable cytosolic iron-sulfur protein assembly protein CIAO1	CIAO1		31.225	30.6638	31.272	30.6338	30.9927	30.7524	31.0783	30.5402
Q6FI81;Q6FI81-3	Anamorsin	CIAPIN1		30.4624	30.1715	30.4989	30.3558	30.6194	30.3039	31.5081	30.1588
Q96RK0	Protein capicua homolog	CIC		25.3552	26.8153	25.796	25.8471	25.9189	25.9643	26.2384	26.7676
Q9BW66;Q9BW66-3;Q9BW66-2	Cyclin-dependent kinase 2-interacting protein	CINP		28.1447	25.5296	28.6344	26.6963	29.0519	24.74	28.7557	23.7805
Q86X95;Q86X95-2	Corepressor interacting with RBPJ 1	CIR1		25.0284	26.1129	25.7255	26.0261	25.6172	24.5603	25.1227	26.1332
Q14011;Q14011-2	Cold-inducible RNA-binding protein	CIRBP		31.7155	30.4998	31.9824	30.9676	32.3179	30.7622	31.9794	30.6026
Q969X6;Q969X6-2;Q969X6-3	Cirhin	CIRH1A		28.4173	29.0504	28.5113	29.1423	28.1825	29.1414	28.3251	29.1472
Q9NZ45	CDGSH iron-sulfur domain-containing protein 1	CISD1		30.7549	29.6028	31.076	30.2206	30.5633	29.7797	30.0496	28.9044
Q8N5K1	CDGSH iron-sulfur domain-containing protein 2	CISD2		31.4215	31.2945	31.08	31.6882	30.528	31.3255	31.3144	31.1827
P0C7P0	CDGSH iron-sulfur domain-containing protein 3, mitochondrial	CISD3		27.289	26.3141	26.7419	27.2593	26.9283	26.5358	26.9004	26.6036
O14578-4;O14578;O14578-3	Citron Rho-interacting kinase	CIT		30.8151	30.7126	30.8946	30.3292	30.6479	30.763	29.1957	28.6085
Q9ULV3-5;Q9ULV3;Q9ULV3-2;Q9ULV3-3;Q9ULV3-4	Cip1-interacting zinc finger protein	CIZ1		26.6651	26.5961	27.0476	26.4709	26.9102	27.3014	27.1587	26.9947
Q07065	Cytoskeleton-associated protein 4	CKAP4		36.7877	36.9221	36.9835	37.033	37.1667	37.4165	36.7654	37.0775
Q14008;Q14008-3;Q14008-2	Cytoskeleton-associated protein 5	CKAP5		33.6589	33.8348	33.8178	33.7523	33.835	34.0858	33.6292	33.8718
P12277	Creatine kinase B-type	CKB		35.3514	34.8573	34.0512	33.1941	33.5166	33.1855	32.9605	32.5963
P61024	Cyclin-dependent kinases regulatory subunit 1	CKS1B		25.1316	26.2339	25.5223	26.9453	25.238	26.1526	25.2807	26.1168
P33552	Cyclin-dependent kinases regulatory subunit 2	CKS2		25.6938	27.3482	27.4122	27.4139	26.404	27.3373	26.3112	26.0212
Q7Z460-4;Q7Z460-3;Q7Z460-2;Q7Z460-5;Q7Z460	CLIP-associating protein 1	CLASP1		31.6086	30.9779	31.6524	31.3492	31.3835	31.2694	31.8859	31.2824
O75122-3	CLIP-associating protein 2	CLASP2		29.275	29.3952	29.5449	29.3956	29.8919	28.9515	29.8969	29.5037
O75122	CLIP-associating protein 2	CLASP2		25.4115	25.8333	25.4561	26.2274	25.3546	26.5471	26.326	26.5114
Q8N2M8;Q8N2M8-3;Q8N2M8-4	CLK4-associating serine/arginine rich protein	CLASRP		26.7637	25.9289	27.2332	26.5281	27.4316	26.6367	25.9425	26.3374
Q96S66;Q96S66-2;Q96S66-3;Q96S66-4	Chloride channel CLIC-like protein 1	CLCC1		30.6713	30.9993	30.5362	31.2115	30.8463	30.7572	30.66	30.8448
P51790;P51790-4;P51790-5;P51790-2	H(+)/Cl(-) exchange transporter 3	CLCN3		28.8438	28.6611	28.9112	27.7882	28.7313	28.3786	28.8452	28.2562
P51795;P51795-2	H(+)/Cl(-) exchange transporter 5	CLCN5		24.916	NaN	23.947	NaN	23.5879	NaN	24.2017	24.7182
P51797;P51797-5;P51797-6	Chloride transport protein 6	CLCN6		27.231	26.3842	26.0179	25.1525	26.0388	25.9305	26.7032	25.1815
P51798;P51798-2	H(+)/Cl(-) exchange transporter 7	CLCN7	1	31.0133	30.6995	30.2457	30.5287	30.4171	30.3502	30.5369	30.8602
O75508	Claudin-11	CLDN11		32.7947	32.48	30.1261	30.8403	31.3957	32.0577	30.0822	31.0193
Q9NY35;Q9NY35-2	Claudin domain-containing protein 1	CLDND1		24.7973	29.5216	24.4938	28.7823	25.1225	28.7227	25.4211	28.0539
Q9Y240	C-type lectin domain family 11 member A	CLEC11A		25.7756	26.5986	26.9775	26.3213	26.5053	27.5454	27.0802	26.5614
Q2KHT3	Protein CLEC16A	CLEC16A		30.1962	31.4624	29.866	29.4978	29.8381	29.4062	30.7895	30.111
Q2KHT3-2	Protein CLEC16A	CLEC16A		NaN	24.987	NaN	25.8513	24.3134	26.2554	NaN	25.071
Q92478	C-type lectin domain family 2 member B	CLEC2B		25.5205	26.8965	26.2658	27.5584	29.4551	29.9393	26.303	25.9958
P05452	Tetranectin	CLEC3B		31.3599	30.4105	29.7294	28.7336	26.7895	27.4069	22.7989	22.4937
O14967;O14967-2	Calmegin	CLGN		30.0716	29.8676	28.0745	24.4418	28.8623	28.8372	27.6053	27.2878
O00299	Chloride intracellular channel protein 1	CLIC1		35.242	35.5365	35.1786	35.6657	35.2756	35.6527	34.9573	35.1958
O15247	Chloride intracellular channel protein 2	CLIC2		29.3405	28.0481	28.2278	27.78	24.934	22.7076	25.4965	24.3031
O95833	Chloride intracellular channel protein 3	CLIC3		31.8298	30.5929	30.0346	30.5071	25.6183	25.0664	28.6711	27.9088
Q9Y696	Chloride intracellular channel protein 4	CLIC4		35.4082	35.6838	35.6261	36.1423	35.3863	35.8251	35.3315	35.8437
Q96NY7;Q96NY7-2	Chloride intracellular channel protein 6	CLIC6		25.3711	NaN	26.1999	24.7083	24.3138	24.8389	25.3387	NaN
Q14677-3;Q14677-2	Clathrin interactor 1	CLINT1		32.7057	32.5681	32.7822	32.4057	32.6433	32.487	32.6621	32.8056
P30622-2	CAP-Gly domain-containing linker protein 1	CLIP1		33.3601	34.07	33.3447	34.0969	33.5245	34.2351	33.7115	34.0194
Q9UDT6-2	CAP-Gly domain-containing linker protein 2	CLIP2		31.9923	32.0026	32.0747	31.816	32.2048	32.0869	31.6242	31.408
Q8N3C7;Q8N3C7-3;Q8N3C7-2	CAP-Gly domain-containing linker protein 4	CLIP4		25.0366	NaN	25.2448	26.3864	24.2952	NaN	25.5122	NaN
Q9H6B4	CXADR-like membrane protein	CLMP		31.17	31.193	30.8159	30.7428	30.7853	31.0846	30.1037	30.9413
Q13286;Q13286-6;Q13286-4;Q13286-2;Q13286-7;Q13286-3;Q13286-5	Battenin	CLN3	1	26.0798	24.0518	25.7911	24.2864	26.6822	24.8759	26.8459	25.7058
O75503	Ceroid-lipofuscinosis neuronal protein 5	CLN5		30.7154	30.4656	30.3517	30.3121	30.0246	30.108	30.9929	30.8339
Q9UBY8	Protein CLN8	CLN8		25.1668	26.2079	25.6864	25.5258	NaN	26.4514	26.5886	26.4624
P54105	Methylosome subunit pICln	CLNS1A		29.5194	30.3763	30.1816	29.8191	30.1145	30.138	29.6169	29.7607
O15516	Circadian locomoter output cycles protein kaput	CLOCK		25.6746	24.4457	25.9426	NaN	26.269	25.9229	26.4011	25.7347
Q92989;Q92989-2	Polyribonucleotide 5-hydroxyl-kinase Clp1	CLP1		25.7535	25.8752	25.8304	25.7696	25.3549	25.7019	25.7457	25.5854
Q9H078-2;Q9H078;Q9H078-3;Q9H078-5;Q9H078-4	Caseinolytic peptidase B protein homolog	CLPB		30.3023	30.3694	30.6226	30.2065	30.8331	30.2601	30.7031	29.9241
Q16740	ATP-dependent Clp protease proteolytic subunit, mitochondrial	CLPP		30.7723	30.8381	30.23	30.6017	30.0154	31.0666	30.5116	30.8456
O96005;O96005-4;O96005-3	Cleft lip and palate transmembrane protein 1	CLPTM1		31.4095	31.0099	31.6447	31.0218	31.8438	31.1765	32.0252	31.5884
Q96KA5;Q96KA5-2	Cleft lip and palate transmembrane protein 1-like protein	CLPTM1L		30.0605	29.7093	30.2596	29.9117	30.5826	29.8378	30.4088	30.018
O76031	ATP-dependent Clp protease ATP-binding subunit clpX-like, mitochondrial	CLPX		30.4559	30.4225	30.6033	30.2528	30.4317	30.2449	30.846	30.8573
O94985;O94985-2	Calsyntenin-1;Soluble Alc-alpha;CTF1-alpha	CLSTN1		26.9167	27.2234	27.0059	26.4254	27.5549	26.9053	27.5794	26.6951
P09496-2;P09496;P09496-4;P09496-3;P09496-5	Clathrin light chain A	CLTA		32.7517	34.4798	32.7776	33.8597	32.6848	34.2948	32.8742	34.411
P09497-2;P09497	Clathrin light chain B	CLTB		32.6896	33.5738	32.5108	33.887	32.6167	33.8074	32.659	33.7415
Q00610;Q00610-2	Clathrin heavy chain 1	CLTC		37.4633	37.4367	37.432	37.3802	37.3727	37.3089	37.3951	37.4516
P53675;P53675-2	Clathrin heavy chain 2	CLTCL1		26.9309	NaN	27.6853	26.2546	26.6067	24.1075	26.7826	26.9697
P10909;P10909-4;P10909-5;P10909-2;P10909-3	Clusterin;Clusterin beta chain;Clusterin alpha chain	CLU		28.5823	28.6233	28.694	28.4575	25.9539	25.8755	26.4301	25.7003
Q96AJ1;Q96AJ1-2	Clusterin-associated protein 1	CLUAP1		26.7709	26.7343	27.1819	27.7587	27.8909	27.1667	27.119	26.2427
O75153	Clustered mitochondria protein homolog	CLUH		30.6563	30.8505	30.8156	30.3671	30.5255	30.4844	30.7126	30.6388
Q8NFW8	N-acylneuraminate cytidylyltransferase	CMAS		30.3597	30.765	30.4881	30.8568	30.2624	30.6069	30.0547	30.2642
Q96DG6	Carboxymethylenebutenolidase homolog	CMBL		31.1648	31.2455	31.0669	31.8968	30.9143	31.7336	30.6747	30.5625
Q7Z7K0	COX assembly mitochondrial protein homolog	CMC1		28.6196	27.7627	28.0124	27.6418	27.9498	27.2418	28.4373	28.116
Q9NRP2	COX assembly mitochondrial protein 2 homolog	CMC2		28.6574	28.5045	28.891	28.1265	29.0083	27.1929	29.3159	29.2667
Q8IY22;Q8IY22-2;Q8IY22-3	C-Maf-inducing protein	CMIP		26.7554	25.6323	26.2857	25.8855	27.137	25.8164	26.5237	25.8238
P30085;P30085-2	UMP-CMP kinase	CMPK1		33.1094	33.5459	33.0286	33.539	32.9686	33.4961	32.8856	33.2779
Q9BQ75;Q9BQ75-2	Protein CMSS1	CMSS1		27.0072	NaN	27.8409	28.7034	27.8118	NaN	27.313	27.1643
Q96MX0-2;Q96MX0	CKLF-like MARVEL transmembrane domain-containing protein 3	CMTM3		25.3019	24.9673	25.305	25.3282	26.2218	25.3726	25.3937	24.9968
Q9NX76	CKLF-like MARVEL transmembrane domain-containing protein 6	CMTM6		NaN	26.6791	26.6843	27.891	26.8554	26.8792	27.3009	28.3317
Q8N1G2	Cap-specific mRNA (nucleoside-2-O-)-methyltransferase 1	CMTR1		29.4327	29.3301	29.9676	29.7076	29.613	29.5944	29.3218	29.3489
P62633-4;P62633-8	Cellular nucleic acid-binding protein	CNBP		32.9816	32.6009	32.7024	32.3144	32.681	32.3106	32.3301	31.8597
P62633;P62633-2;P62633-7;P62633-3;P62633-5;P62633-6	Cellular nucleic acid-binding protein	CNBP		29.4825	29.0221	29.7864	29.2059	29.4134	28.882	29.7071	28.4381
Q96KP4;Q96KP4-2	Cytosolic non-specific dipeptidase	CNDP2		33.677	33.6965	33.9065	33.6486	33.45	32.9724	33.0463	32.7586
Q8N9A8;Q8N9A8-2	Nuclear envelope phosphatase-regulatory subunit 1	CNEP1R1		26.8483	27.4337	27.6948	27.2142	27.2494	27.0879	26.7421	26.4078
Q8TBE1	Protein cornichon homolog 3	CNIH3		25.3655	25.2087	NaN	25.2165	25.6222	28.0695	NaN	24.4215
Q9P003	Protein cornichon homolog 4	CNIH4		31.0514	31.0933	30.9998	31.2729	30.9594	31.172	31.1077	30.4346
P51911;P51911-2	Calponin-1	CNN1		32.6402	32.8399	33.0918	33.763	32.1154	32.0768	34.2939	34.9385
Q99439;Q99439-2	Calponin-2	CNN2		33.5283	34.5333	33.9163	35.3225	34.0292	34.918	34.5618	35.7679
Q15417;Q15417-3	Calponin-3	CNN3		33.4173	33.7764	33.8625	34.3941	34.0541	34.13	34.3593	34.9014
Q8NE01;Q8NE01-2;Q8NE01-3	Metal transporter CNNM3	CNNM3		26.8531	26.5661	26.5285	27.1968	27.2765	27.2237	26.9466	26.8421
Q6P4Q7	Metal transporter CNNM4	CNNM4		25.7605	NaN	25.5847	26.3427	25.9503	24.2725	26.2598	24.8815
A5YKK6;A5YKK6-4	CCR4-NOT transcription complex subunit 1	CNOT1		32.465	32.4972	32.5977	32.5525	32.6546	32.4869	32.4799	32.4612
A5YKK6-2;A5YKK6-3	CCR4-NOT transcription complex subunit 1	CNOT1		25.1478	NaN	25.0512	NaN	25.5034	24.9091	25.2739	24.6536
Q9H9A5;Q9H9A5-6;Q9H9A5-2;Q9H9A5-4;Q9H9A5-3	CCR4-NOT transcription complex subunit 10	CNOT10		27.8442	29.2515	27.3813	29.0678	28.344	29.0719	27.3644	28.9712
Q9UKZ1	CCR4-NOT transcription complex subunit 11	CNOT11		28.0116	26.7141	28.1703	26.6218	26.332	26.6995	28.1992	25.1168
Q9NZN8;Q9NZN8-4;Q9NZN8-5;Q9NZN8-2	CCR4-NOT transcription complex subunit 2	CNOT2		30.0868	29.9928	30.055	30.0989	30.0146	30.2624	30.0342	29.913
O75175;O75175-2	CCR4-NOT transcription complex subunit 3	CNOT3		30.8527	30.3903	31.1716	30.6217	30.6905	30.5194	30.6304	30.4294
O95628-8;O95628-9;O95628-2;O95628-4;O95628-10;O95628;O95628-3;O95628-7;O95628-6;O95628-5	CCR4-NOT transcription complex subunit 4	CNOT4		28.0458	27.5831	28.1822	27.787	27.7944	28.112	27.914	27.5689
Q9UIV1;Q9UIV1-2	CCR4-NOT transcription complex subunit 7	CNOT7		28.5423	27.7953	28.7919	28.5536	28.7812	28.3252	28.0778	28.4976
Q9UFF9;Q9UFF9-3;Q9UFF9-2	CCR4-NOT transcription complex subunit 8	CNOT8		26.226	25.8723	26.7853	25.3527	26.813	25.7681	26.6608	25.6903
P09543;P09543-2	2,3-cyclic-nucleotide 3-phosphodiesterase	CNP		33.2738	33.1485	33.0958	32.8064	32.9396	32.9262	32.8035	33.3863
Q9Y2B0	Protein canopy homolog 2	CNPY2		32.3495	33.1786	32.4787	33.335	33.0321	33.2738	32.9193	33.4194
Q9BT09	Protein canopy homolog 3	CNPY3		31.1975	30.4548	31.0854	30.9245	31.3864	31.2841	31.5448	31.0793
Q8N129	Protein canopy homolog 4	CNPY4		31.5924	32.1489	31.6624	31.7116	31.9726	32.2069	31.1345	31.4862
Q96F85;Q96F85-2	CB1 cannabinoid receptor-interacting protein 1	CNRIP1		30.0168	29.7634	29.9141	29.5595	30.2028	30.1556	29.8289	30.0384
Q6PJW8;Q6PJW8-2	Consortin	CNST		28.1605	27.9921	28.5788	29.0926	28.3146	28.5437	28.7407	28.8996
Q9P232	Contactin-3	CNTN3		29.3651	26.8295	30.079	27.6748	29.6051	28.581	27.3581	26.5303
P78357	Contactin-associated protein 1	CNTNAP1		31.0192	30.7644	30.8903	30.6919	30.5047	30.1905	30.5014	30.2829
Q9GZY4	Cytochrome c oxidase assembly factor 1 homolog	COA1		26.6274	NaN	27.5113	NaN	26.8021	NaN	26.9196	25.8513
Q9Y2R0	Cytochrome c oxidase assembly factor 3 homolog, mitochondrial	COA3		30.2482	30.3369	29.8127	29.6919	29.5784	30.5585	29.8153	29.6263
Q9NYJ1;Q9NYJ1-2	Cytochrome c oxidase assembly factor 4 homolog, mitochondrial	COA4		26.962	27.603	26.8199	28.5661	28.1734	27.9578	25.1876	27.5066
Q86WW8	Cytochrome c oxidase assembly factor 5	COA5		25.1326	26.0027	25.8034	26.2871	25.3234	26.3425	24.6056	25.5721
Q5JTJ3;Q5JTJ3-2;Q5JTJ3-3	Cytochrome c oxidase assembly factor 6 homolog	COA6		28.8122	28.6095	28.433	28.5083	29.1595	29.2523	29.6032	28.6091
Q96BR5	Cytochrome c oxidase assembly factor 7	COA7		28.0695	27.6129	28.0547	28.1176	28.5716	28.5999	29.2764	28.3348
Q13057;Q13057-2	Bifunctional coenzyme A synthase;Phosphopantetheine adenylyltransferase;Dephospho-CoA kinase	COASY		31.1981	30.5121	30.5466	30.6881	31.3109	30.2273	30.6659	29.598
Q53SF7-4;Q53SF7-2;Q53SF7;Q53SF7-3	Cordon-bleu protein-like 1	COBLL1		28.9945	28.3751	30.3934	29.8878	29.6376	29.5713	30.678	30.115
Q8WTW3	Conserved oligomeric Golgi complex subunit 1	COG1		29.8719	29.8863	30.0334	29.4622	29.9964	29.8864	30.3568	29.9008
Q14746;Q14746-2	Conserved oligomeric Golgi complex subunit 2	COG2		30.2426	30.0046	30.3403	29.8433	30.8084	29.9824	30.5847	29.8251
Q96JB2;Q96JB2-2	Conserved oligomeric Golgi complex subunit 3	COG3		31.1176	30.4546	30.8552	30.396	31.2313	30.1921	31.3446	30.6945
Q9H9E3;Q9H9E3-3;Q9H9E3-2	Conserved oligomeric Golgi complex subunit 4	COG4		30.0814	29.5502	30.4727	29.9076	30.217	29.6701	30.5563	29.7535
Q9UP83;Q9UP83-2;Q9UP83-3	Conserved oligomeric Golgi complex subunit 5	COG5		29.902	29.613	30.1176	29.3177	30.1448	29.7706	29.6207	29.4948
Q9Y2V7;Q9Y2V7-2	Conserved oligomeric Golgi complex subunit 6	COG6		30.2702	30.221	30.1006	30.1541	30.178	30.3329	30.0049	30.4425
P83436	Conserved oligomeric Golgi complex subunit 7	COG7		30.9222	30.5315	30.9411	30.7551	31.0125	30.8976	30.6136	30.8898
Q96MW5	Conserved oligomeric Golgi complex subunit 8	COG8		30.0698	28.8024	29.7948	29.1739	30.2352	29.2553	30.0697	28.5654
P38432	Coilin	COIL		29.1686	26.1517	28.5055	27.927	28.0178	25.2509	28.0101	NaN
Q03692	Collagen alpha-1(X) chain	COL10A1		25.1308	25.935	24.4185	25.1422	24.0723	25.0466	25.6724	NaN
P12107;P12107-2;P12107-3	Collagen alpha-1(XI) chain	COL11A1		22.8826	22.1405	26.4217	28.7196	25.5508	21.7729	31.3717	32.9879
Q99715;Q99715-4;Q99715-2	Collagen alpha-1(XII) chain	COL12A1		36.6821	36.8087	36.7343	37.4506	37.8981	37.8235	37.162	37.2999
Q5TAT6;Q5TAT6-8;Q5TAT6-11;Q5TAT6-9;Q5TAT6-10;Q5TAT6-4;Q5TAT6-3;Q5TAT6-7;Q5TAT6-2;Q5TAT6-5;Q5TAT6-6	Collagen alpha-1(XIII) chain	COL13A1		NaN	26.6199	26.1227	26.0898	26.6231	27.4191	24.0177	NaN
Q05707-2;Q05707;Q05707-3	Collagen alpha-1(XIV) chain	COL14A1		31.8103	30.5394	30.8616	30.4791	31.9134	30.8429	31.3072	30.3963
P39059	Collagen alpha-1(XV) chain;Restin;Restin-2;Restin-3;Restin-4	COL15A1		29.5575	28.3451	25.5548	24.1582	29.0049	28.0618	28.6771	28.6185
Q07092;Q07092-2	Collagen alpha-1(XVI) chain	COL16A1		31.3524	31.6228	30.7185	31.9215	31.3733	31.8807	32.8003	32.8946
P39060;P39060-2;P39060-1	Collagen alpha-1(XVIII) chain;Endostatin	COL18A1		29.5918	29.4321	29.4776	29.1215	29.8661	29.9749	28.3366	28.5532
P02452	Collagen alpha-1(I) chain	COL1A1		36.4532	36.6602	36.4219	37.1479	36.5247	36.8101	37.6828	38.2337
P08123	Collagen alpha-2(I) chain	COL1A2		36.0517	36.0092	36.0028	36.4419	36.1844	36.3437	36.745	37.1661
P02458;P02458-1	Collagen alpha-1(II) chain;Collagen alpha-1(II) chain;Chondrocalcin	COL2A1		NaN	26.6963	26.9747	26.029	NaN	25.6291	NaN	25.4034
P02461;P02461-2	Collagen alpha-1(III) chain	COL3A1		34.8443	34.4397	33.9326	33.8445	34.2851	34.1967	34.0686	33.9071
P02462;P02462-2	Collagen alpha-1(IV) chain;Arresten	COL4A1		24.927	26.6422	NaN	27.8108	NaN	26.7334	32.0527	32.6108
P08572	Collagen alpha-2(IV) chain;Canstatin	COL4A2		24.1742	28.039	25.5186	26.1432	NaN	27.0199	30.0557	30.989
Q9Y5P4;Q9Y5P4-3;Q9Y5P4-2	Collagen type IV alpha-3-binding protein	COL4A3BP		31.0501	31.1287	30.3969	30.642	30.5239	30.7921	30.4449	30.5387
P20908	Collagen alpha-1(V) chain	COL5A1		32.3234	32.2448	32.2606	32.5971	32.5246	32.5077	33.4601	34.0359
P05997	Collagen alpha-2(V) chain	COL5A2		31.3663	31.2102	31.2888	31.5037	31.6181	31.4538	32.9094	33.1289
P25940	Collagen alpha-3(V) chain	COL5A3		26.2409	25.2208	25.7997	25.7831	26.0109	NaN	29.1986	26.27
P12109	Collagen alpha-1(VI) chain	COL6A1		35.4901	35.6172	35.0197	35.726	35.7306	35.7662	35.34	35.9732
P12110;P12110-3	Collagen alpha-2(VI) chain	COL6A2		34.5767	34.5913	34.4337	34.3168	35.0856	34.831	34.8697	34.8506
P12110-2	Collagen alpha-2(VI) chain	COL6A2		28.5485	29.2584	27.8531	29.107	29.4999	29.8207	NaN	28.1374
P12111;P12111-2	Collagen alpha-3(VI) chain	COL6A3		35.8074	36.0002	36.0208	35.7473	36.4289	36.4091	36.258	36.4562
A6NMZ7;A6NMZ7-2	Collagen alpha-6(VI) chain	COL6A6		32.0748	31.0103	28.2493	25.6185	26.0816	25.3398	22.791	23.9018
Q02388;Q02388-2	Collagen alpha-1(VII) chain	COL7A1		25.1613	27.954	26.0147	25.6202	26.7479	25.1514	27.2165	26.2217
P27658	Collagen alpha-1(VIII) chain;Vastatin	COL8A1		30.9566	30.6356	30.9886	30.81	31.7452	31.6559	31.8064	30.2623
Q5KU26	Collectin-12	COLEC12		31.4759	31.5835	31.8814	32.3385	31.9357	31.9338	28.6896	29.8218
Q8NBJ5	Procollagen galactosyltransferase 1	COLGALT1		32.6194	32.9408	32.6159	33.2306	32.6164	33.1311	32.8668	33.3792
Q8IYK4	Procollagen galactosyltransferase 2	COLGALT2		26.1022	NaN	26.7252	25.5164	27.6299	26.9998	26.3475	25.9635
Q8N668;Q8N668-2	COMM domain-containing protein 1	COMMD1		29.8286	28.3094	29.1893	28.9349	29.9408	28.414	29.2699	28.8402
Q9Y6G5	COMM domain-containing protein 10	COMMD10		30.1166	30.455	29.9894	30.1878	30.0615	30.4933	29.742	29.7785
Q86X83;Q86X83-2	COMM domain-containing protein 2	COMMD2		28.1153	30.0121	28.5803	29.619	27.663	30.6083	28.7074	29.9481
Q9UBI1	COMM domain-containing protein 3	COMMD3		30.9954	31.2978	30.8913	30.9452	30.8095	30.7186	31.0668	30.7855
Q9H0A8;Q9H0A8-2;Q9H0A8-3	COMM domain-containing protein 4	COMMD4		31.1261	31.5511	31.4012	32.1645	31.4906	32.1746	31.1399	31.4881
Q9GZQ3	COMM domain-containing protein 5	COMMD5		28.9421	29.6654	28.3673	29.914	28.412	29.2748	28.2394	28.5016
Q7Z4G1;Q7Z4G1-2	COMM domain-containing protein 6	COMMD6		30.2481	30.0467	30.1529	30.3455	30.4868	30.2789	30.3689	30.1321
Q86VX2;Q86VX2-2	COMM domain-containing protein 7	COMMD7		29.3356	29.6933	29.0384	28.4656	29.4021	28.9576	29.0488	29.0752
Q9NX08	COMM domain-containing protein 8	COMMD8		29.212	29.9317	28.7161	30.0999	28.8147	29.3595	28.97	29.656
Q9P000;Q9P000-2	COMM domain-containing protein 9	COMMD9		30.3556	30.187	30.1036	30.0901	30.5333	30.0764	30.2318	29.9617
P49747-2;P49747	Cartilage oligomeric matrix protein	COMP		26.6218	27.0413	27.257	26.712	28.3864	26.7816	25.2281	25.3518
P21964;P21964-2	Catechol O-methyltransferase	COMT		34.9434	33.954	35.054	34.4463	35.365	33.6594	35.3553	34.5627
P53621	Coatomer subunit alpha;Xenin;Proxenin	COPA		35.7615	35.6212	35.5689	35.5548	35.5698	35.4443	35.5308	35.6508
P53618	Coatomer subunit beta	COPB1		35.037	34.9318	35.1507	34.9096	35.0811	34.9104	34.9445	34.969
P35606	Coatomer subunit beta	COPB2		35.5379	35.4932	35.5203	35.363	35.6813	35.4585	35.4109	35.6835
O14579;O14579-3;O14579-2	Coatomer subunit epsilon	COPE		33.0091	33.2373	33.2886	33.1545	33.2777	33.1713	32.8729	33.8869
Q9Y678	Coatomer subunit gamma-1	COPG1		34.7026	34.9888	34.8759	34.9469	35.0412	34.9473	35.0172	35.2448
Q9UBF2;Q9UBF2-2	Coatomer subunit gamma-2	COPG2		32.023	31.9503	31.9941	31.9601	31.8491	31.845	31.6254	31.69
Q9NQ92	Coordinator of PRMT5 and differentiation stimulator	COPRS		NaN	27.6901	26.4446	27.2299	25.7799	26.5466	26.3126	26.0515
P61201;P61201-2	COP9 signalosome complex subunit 2	COPS2		32.5237	32.4323	32.4731	32.547	32.6079	33.0935	32.5879	32.3009
Q9UNS2;Q9UNS2-2	COP9 signalosome complex subunit 3	COPS3		31.4563	32.3085	31.4946	32.4343	31.5098	32.0222	31.3339	31.8911
Q9BT78;Q9BT78-2	COP9 signalosome complex subunit 4	COPS4		33.1283	33.0476	33.0042	33.218	32.8915	33.1889	32.762	32.7725
Q92905	COP9 signalosome complex subunit 5	COPS5		31.2672	31.6519	31.1125	31.5544	31.2941	31.7526	30.8592	31.538
Q7L5N1	COP9 signalosome complex subunit 6	COPS6		32.0289	33.0665	32.4	32.5315	32.3732	32.5179	32.1435	32.1717
Q9UBW8	COP9 signalosome complex subunit 7a	COPS7A		31.5689	31.9444	31.0809	31.8005	31.151	31.3548	30.95	31.4817
Q9H9Q2;Q9H9Q2-2;Q9H9Q2-3	COP9 signalosome complex subunit 7b	COPS7B		29.345	28.5557	29.0868	28.8619	29.2841	28.7671	29.4447	29.2391
Q99627;Q99627-2	COP9 signalosome complex subunit 8	COPS8		31.22	30.9977	31.1353	30.9612	30.9749	30.9149	30.7969	30.7082
P61923;P61923-4;P61923-5;P61923-3	Coatomer subunit zeta-1	COPZ1		32.9234	31.9207	32.8133	31.8327	32.8317	31.996	33.0728	32.1544
Q9P299	Coatomer subunit zeta-2	COPZ2		32.5398	31.1545	32.7066	31.739	32.5189	31.344	32.6028	31.0911
Q9NZJ6	Ubiquinone biosynthesis O-methyltransferase, mitochondrial	COQ3		27.5617	26.4414	26.3707	25.5045	26.3435	25.5478	25.4152	NaN
Q5HYK3	2-methoxy-6-polyprenyl-1,4-benzoquinol methylase, mitochondrial	COQ5		28.5524	26.9119	27.8433	26.576	27.2493	25.836	26.6427	NaN
Q99807;Q99807-2	5-demethoxyubiquinone hydroxylase, mitochondrial	COQ7		26.9664	24.622	26.3085	25.8572	26.4482	25.3104	25.3889	NaN
O75208	Ubiquinone biosynthesis protein COQ9, mitochondrial	COQ9		27.6719	27.0214	27.8647	27.2921	25.3072	26.4436	26.5522	26.2578
Q9BR76	Coronin-1B	CORO1B		33.1	33.068	32.6988	33.1613	33.0599	33.0585	32.5445	32.6838
Q9ULV4;Q9ULV4-2;Q9ULV4-3	Coronin-1C	CORO1C		34.7618	35.0142	34.6661	35.0376	34.4854	34.8062	34.4004	34.8283
Q9UQ03;Q9UQ03-2	Coronin-2B	CORO2B		30.0918	28.6715	30.1948	29.0493	29.4462	26.9634	30.6769	29.7514
P57737-3;P57737;P57737-4;P57737-2	Coronin-7	CORO7		30.7971	30.4411	31.0064	30.2185	31.4126	31.0943	30.8886	30.274
Q14019	Coactosin-like protein	COTL1		32.8124	34.0597	32.4956	33.8928	32.8633	33.8914	32.5891	33.6507
Q9Y6N1;Q9Y6N1-2	Cytochrome c oxidase assembly protein COX11, mitochondrial	COX11		28.8808	27.5174	27.6555	27.5557	28.5555	27.7098	28.5477	27.4159
Q7KZN9;Q7KZN9-2	Cytochrome c oxidase assembly protein COX15 homolog	COX15		28.0444	28.1789	28.4802	27.7923	27.4682	27.2226	27.8249	27.2974
Q9P0S2	Cytochrome c oxidase assembly protein COX16 homolog, mitochondrial	COX16		26.6882	NaN	25.8141	26.7403	27.6486	26.9569	27.4494	27.5865
Q14061	Cytochrome c oxidase copper chaperone	COX17		27.3831	30.3131	26.9475	29.904	27.205	31.5335	28.1941	30.6543
Q49B96	Cytochrome c oxidase assembly protein COX19	COX19		26.8508	26.5704	26.1342	26.6241	26.6216	26.4631	26.8598	26.4646
Q5RI15;Q5RI15-2	Cytochrome c oxidase protein 20 homolog	COX20		29.9048	29.3373	30.1619	29.8914	29.9546	30.0434	30.7457	30.8158
P13073	Cytochrome c oxidase subunit 4 isoform 1, mitochondrial	COX4I1		33.6457	33.4774	33.5354	33.6562	33.8081	34.1267	33.328	33.5742
P20674	Cytochrome c oxidase subunit 5A, mitochondrial	COX5A		32.246	32.2606	32.0704	31.9216	32.2592	31.3966	32.2295	31.5702
P10606	Cytochrome c oxidase subunit 5B, mitochondrial	COX5B		32.1521	32.2504	32.4659	32.2512	33.1036	33.1627	32.8421	32.5904
P14854	Cytochrome c oxidase subunit 6B1	COX6B1		31.5498	31.7749	31.1635	31.8154	31.611	32.2501	31.673	31.8747
P09669	Cytochrome c oxidase subunit 6C	COX6C		31.4459	32.2576	31.4033	32.15	30.875	33.1604	31.3138	32.4612
P24310	Cytochrome c oxidase subunit 7A1, mitochondrial	COX7A1		28.0552	28.7003	27.5193	28.4332	28.1765	28.5595	NaN	28.2215
P14406	Cytochrome c oxidase subunit 7A2, mitochondrial	COX7A2		30.2955	30.0975	30.2056	31.7873	30.4434	30.4145	27.6943	30.504
O14548	Cytochrome c oxidase subunit 7A-related protein, mitochondrial	COX7A2L		29.2296	28.876	29.0215	28.9719	28.9786	29.9217	29.3567	29.3294
P15954	Cytochrome c oxidase subunit 7C, mitochondrial	COX7C		31.5775	30.1388	30.8783	29.9214	30.8275	30.2838	30.6464	31.116
O75976;O75976-2	Carboxypeptidase D	CPD		31.1216	31.0302	31.3606	31.0541	30.9458	30.9605	31.138	30.7416
P16870;P16870-2	Carboxypeptidase E	CPE		24.1594	25.4231	NaN	NaN	26.5096	25.3559	26.8461	27.7347
Q7Z5Q1;Q7Z5Q1-7;Q7Z5Q1-5;Q7Z5Q1-4;Q7Z5Q1-6;Q7Z5Q1-3;Q7Z5Q1-8;Q7Z5Q1-9	Cytoplasmic polyadenylation element-binding protein 2	CPEB2		26.4241	25.7212	26.1889	25.6753	25.6833	25.0612	27.0716	26.2445
P14384	Carboxypeptidase M	CPM		25.9809	27.2775	25.8598	27.3443	23.1434	23.0891	26.2917	27.4401
Q99829	Copine-1	CPNE1		32.2218	32.3345	32.2662	32.5642	32.0999	31.8037	31.7264	32.0374
Q96FN4;Q96FN4-2	Copine-2	CPNE2		28.8663	28.2833	29.7911	29.1643	30.0678	29.2516	29.2457	29.001
O75131	Copine-3	CPNE3		32.9745	32.9327	33.1649	33.0077	33.5756	33.3147	32.6153	32.4083
Q9UBL6;Q9UBL6-2	Copine-7	CPNE7		NaN	24.6277	25.4741	25.6493	26.4275	26.5163	28.5943	28.085
Q86YQ8	Copine-8	CPNE8		27.0978	26.6319	28.3792	27.3754	27.2361	25.7121	28.4891	27.4693
P36551	Oxygen-dependent coproporphyrinogen-III oxidase, mitochondrial	CPOX		32.7294	32.1979	32.0381	32.0076	32.195	31.9301	31.8274	31.1605
Q9BRF8;Q9BRF8-2	Serine/threonine-protein phosphatase CPPED1	CPPED1		33.7549	32.93	33.404	33.2391	33.4168	32.9909	33.1127	32.5719
Q9Y646	Carboxypeptidase Q	CPQ		31.919	31.4583	31.1852	31.3391	32.0035	31.6091	31.5989	31.2575
P31327;P31327-3;P31327-2	Carbamoyl-phosphate synthase [ammonia], mitochondrial	CPS1		28.4233	28.0431	27.9683	27.2591	28.1511	27.9848	28.8917	28.4639
Q10570	Cleavage and polyadenylation specificity factor subunit 1	CPSF1		30.9458	30.3653	31.0529	30.2283	31.2307	30.3775	30.8419	30.331
Q9P2I0	Cleavage and polyadenylation specificity factor subunit 2	CPSF2		30.0965	29.93	30.1105	29.7526	29.8692	29.989	29.8792	30.0875
Q9UKF6	Cleavage and polyadenylation specificity factor subunit 3	CPSF3		30.5674	30.3609	30.5949	30.2967	30.3594	30.2699	30.0112	30.4159
Q5TA45;Q5TA45-2;Q5TA45-3;Q5TA45-5;Q5TA45-4	Integrator complex subunit 11	CPSF3L		27.7917	28.3695	28.2118	28.1452	28.2138	27.5648	28.1587	28.508
O95639;O95639-2;O95639-3	Cleavage and polyadenylation specificity factor subunit 4	CPSF4		28.9996	28.1462	29.0012	28.4137	28.9993	28.7694	28.5103	28.491
Q16630-2;Q16630;Q16630-3	Cleavage and polyadenylation specificity factor subunit 6	CPSF6		31.1839	31.3276	31.3079	31.4683	30.9764	31.3731	31.1121	31.7319
Q8N684;Q8N684-2;Q8N684-3	Cleavage and polyadenylation specificity factor subunit 7	CPSF7		30.863	31.0083	30.9632	31.0558	30.8908	30.9492	30.6809	30.6549
P50416;P50416-2	Carnitine O-palmitoyltransferase 1, liver isoform	CPT1A		31.5612	31.936	31.7644	31.9787	31.8064	32.3595	31.9489	32.1656
Q8TCG5;Q8TCG5-3;Q8TCG5-2	Carnitine O-palmitoyltransferase 1, brain isoform	CPT1C		26.7728	26.0737	26.9291	26.054	27.4459	25.9359	27.1218	26.5533
P23786	Carnitine O-palmitoyltransferase 2, mitochondrial	CPT2		30.874	31.1141	30.8265	31.2561	30.665	30.9529	31.2035	31.2653
Q5TA50	Ceramide-1-phosphate transfer protein	CPTP		25.3707	26.5454	NaN	25.5052	NaN	25.324	NaN	25.1801
Q8N436	Inactive carboxypeptidase-like protein X2	CPXM2		23.8938	NaN	24.9089	23.2169	24.8511	25.3466	26.0247	NaN
P29373	Cellular retinoic acid-binding protein 2	CRABP2		34.2906	33.3683	34.1849	33.863	33.7357	33.0347	32.9995	32.7159
Q9BSW2-2	EF-hand calcium-binding domain-containing protein 4B	CRACR2A		26.3569	26.3012	27.0367	27.9204	26.5878	26.7103	27.185	27.0504
P78560	Death domain-containing protein CRADD	CRADD		27.7913	28.3992	28.2351	28.4729	28.3093	27.8186	27.6777	26.9504
P43155;P43155-2;P43155-3	Carnitine O-acetyltransferase	CRAT		31.7775	31.892	31.4541	31.6922	31.8547	32.2115	31.4021	31.9413
Q96SW2;Q96SW2-2	Protein cereblon	CRBN		29.232	27.6312	29.0702	28.6197	28.7323	29.1163	28.5006	28.1908
P16220;P16220-2;P16220-3	Cyclic AMP-responsive element-binding protein 1	CREB1		26.4313	28.9291	27.9354	28.3502	28.1633	28.3933	28.8012	28.689
Q96BA8;Q96BA8-2	Cyclic AMP-responsive element-binding protein 3-like protein 1;Processed cyclic AMP-responsive element-binding protein 3-like protein 1	CREB3L1		27.535	27.9629	28.0039	27.3939	27.6054	28.2735	27.5828	27.932
Q70SY1-2	Cyclic AMP-responsive element-binding protein 3-like protein 2;Processed cyclic AMP-responsive element-binding protein 3-like protein 2	CREB3L2		23.8098	NaN	24.2957	22.6771	24.774	NaN	25.2782	24.4092
Q92793;Q92793-2	CREB-binding protein	CREBBP		27.887	27.8943	28.5966	28.3735	28.0879	28.4062	27.9414	28.0592
O75629	Protein CREG1	CREG1	1	25.6303	26.4284	25.909	27.1685	25.293	25.804	26.1752	26.2378
Q96HD1;Q96HD1-2	Cysteine-rich with EGF-like domain protein 1	CRELD1		29.0196	29.5277	28.8825	28.9196	29.8789	30.1937	29.132	28.6277
Q6UXH1;Q6UXH1-5;Q6UXH1-4;Q6UXH1-6;Q6UXH1-3;Q6UXH1-2	Cysteine-rich with EGF-like domain protein 2	CRELD2		31.0497	31.0863	31.0977	31.2158	31.3832	31.7235	30.7315	30.7536
Q9NZV1	Cysteine-rich motor neuron 1 protein;Processed cysteine-rich motor neuron 1 protein	CRIM1		29.6386	30.1244	30.5419	30.537	29.9015	30.2232	31.0479	30.7852
P50238	Cysteine-rich protein 1	CRIP1		28.0764	33.0061	29.904	33.2753	29.2015	33.2039	29.6582	33.995
P52943;P52943-2	Cysteine-rich protein 2	CRIP2		33.1111	32.7189	34.1916	33.6632	33.2562	33.48	32.8923	32.9464
Q9P021	Cysteine-rich PDZ-binding protein	CRIPT		NaN	26.1004	26.5759	25.4671	25.4997	23.4215	25.8556	25.4265
Q9H0B8;Q9H0B8-2;Q9H0B8-3	Cysteine-rich secretory protein LCCL domain-containing 2	CRISPLD2		NaN	26.5752	25.285	24.229	26.9102	26.804	28.6832	29.388
P46108;P46108-2	Adapter molecule crk	CRK		32.0376	32.7019	31.9127	32.808	32.001	32.7541	31.7902	32.2949
P46109	Crk-like protein	CRKL		31.5503	31.432	31.5613	31.6652	31.8353	31.4977	31.5725	30.8834
Q8IUI8-2;Q8IUI8	Cytokine receptor-like factor 3	CRLF3		28.3535	28.7747	28.4473	28.9737	28.5657	29.6284	28.5133	29.3462
Q9BZJ0;Q9BZJ0-2;Q9BZJ0-3	Crooked neck-like protein 1	CRNKL1		29.7471	28.9191	29.8514	29.3517	29.7906	29.0776	29.7105	28.9347
Q5TZA2;Q5TZA2-2	Rootletin	CROCC		30.2934	31.0792	30.8006	31.2543	30.9568	31.8502	30.1923	31.095
Q9UKG9;Q9UKG9-3	Peroxisomal carnitine O-octanoyltransferase	CROT		26.1882	26.5113	28.1075	27.4473	28.2011	27.8908	26.8816	26.2445
O75718	Cartilage-associated protein	CRTAP		32.9653	33.0279	32.8689	33.0671	33.0088	33.1889	33.2109	33.7787
Q6UUV9;Q6UUV9-3;Q6UUV9-2	CREB-regulated transcription coactivator 1	CRTC1		28.0834	27.3483	27.2746	28.1344	27.7249	28.2548	27.0167	27.6631
Q53ET0	CREB-regulated transcription coactivator 2	CRTC2		28.2718	27.9611	28.387	28.1601	28.5519	28.6248	28.2951	28.0866
Q6UUV7-3;Q6UUV7	CREB-regulated transcription coactivator 3	CRTC3		27.7453	27.0868	27.8213	28.2815	27.8259	27.6019	27.6186	27.3259
P02511	Alpha-crystallin B chain	CRYAB		34.7267	35.0631	34.9234	35.2797	34.6885	35.3932	34.9406	35.2478
Q68DQ2	Very large A-kinase anchor protein	CRYBG3		30.1303	28.8544	30.0341	29.2401	29.922	29.3795	29.5276	29.2387
Q9Y2S2;Q9Y2S2-2	Lambda-crystallin homolog	CRYL1		28.6994	28.5034	27.7356	27.9139	28.8108	29.0012	27.0362	26.6132
Q08257;Q08257-3	Quinone oxidoreductase	CRYZ		33.6749	33.8384	33.3644	33.7607	32.7386	33.455	32.4783	32.8021
O95825;O95825-2	Quinone oxidoreductase-like protein 1	CRYZL1		29.7576	29.0612	29.5678	28.608	29.4476	28.7703	29.4948	29.0996
O75390	Citrate synthase, mitochondrial	CS		32.9307	33.1335	32.7386	33.4499	32.6962	33.4287	32.7313	33.3143
O75534;O75534-2;O75534-4;O75534-3	Cold shock domain-containing protein E1	CSDE1		33.6503	33.8505	33.9913	34.0736	33.7418	33.8107	33.5655	33.7538
P55060;P55060-3;P55060-4	Exportin-2	CSE1L		33.7022	33.6991	33.6173	33.6789	33.5247	33.8377	33.1661	33.5414
P09603;P09603-3;P09603-2	Macrophage colony-stimulating factor 1;Processed macrophage colony-stimulating factor 1	CSF1		28.1285	27.5297	27.2648	26.7371	28.1129	27.6132	26.2071	26.1957
Q8N6G5;Q8N6G5-2	Chondroitin sulfate N-acetylgalactosaminyltransferase 2	CSGALNACT2		25.7252	26.0323	25.8395	25.2662	25.8731	25.866	27.3164	25.9503
P41240	Tyrosine-protein kinase CSK	CSK		32.0344	31.9775	31.9661	31.7115	31.7982	31.6303	31.6893	31.1237
P48729;P48729-2;P48729-3	Casein kinase I isoform alpha	CSNK1A1		29.4075	29.4024	29.6354	29.5428	29.6177	29.7447	30.0952	29.7583
P48730-2;P48730	Casein kinase I isoform delta	CSNK1D		28.3841	30.1487	28.0365	29.724	27.8934	29.6317	28.1279	29.6574
P49674	Casein kinase I isoform epsilon	CSNK1E		26.0835	25.9181	25.7374	24.5727	26.7534	26.3541	26.8758	26.0041
Q9HCP0;Q9HCP0-2	Casein kinase I isoform gamma-1	CSNK1G1		25.1048	24.2793	24.546	23.3561	25.0818	NaN	25.0748	24.2991
P78368	Casein kinase I isoform gamma-2	CSNK1G2		26.2486	25.5828	25.0988	25.465	25.828	25.9124	25.0964	25.3568
Q9Y6M4-4;Q9Y6M4;Q9Y6M4-3;Q9Y6M4-2;Q9Y6M4-6;Q9Y6M4-5	Casein kinase I isoform gamma-3	CSNK1G3		29.2614	28.6334	29.1636	28.5016	27.9791	29.1402	28.8598	28.8159
P68400;Q8NEV1;P68400-2	Casein kinase II subunit alpha;Casein kinase II subunit alpha 3	CSNK2A1;CSNK2A3		32.7901	32.5452	32.5207	32.7557	32.5309	32.2138	32.4939	32.3117
P19784	Casein kinase II subunit alpha	CSNK2A2		31.8786	31.5232	31.8142	31.8061	31.6147	31.2084	31.6298	31.792
P67870	Casein kinase II subunit beta	CSNK2B		31.9346	30.992	31.8754	30.8875	31.6885	31.0466	31.6127	30.893
Q6UVK1	Chondroitin sulfate proteoglycan 4	CSPG4		33.2168	31.6231	33.6271	32.353	32.8395	32.9059	34.005	33.9745
P21291	Cysteine and glycine-rich protein 1	CSRP1		34.0387	33.8023	34.7073	34.8327	34.8613	35.2369	35.7546	36.1623
Q16527	Cysteine and glycine-rich protein 2	CSRP2		30.7776	31.2882	32.7992	33.4248	32.7571	33.004	32.4139	32.7754
P01034	Cystatin-C	CST3		30.0333	29.6897	30.324	29.438	30.3129	30.1789	30.3346	29.5792
P01040	Cystatin-A;Cystatin-A, N-terminally processed	CSTA		27.0741	28.5234	29.2692	29.2846	25.5418	26.3574	28.7843	28.3449
P04080	Cystatin-B	CSTB		34.6563	35.1308	34.45	35.2802	34.5812	35.4511	34.2054	34.6512
Q05048	Cleavage stimulation factor subunit 1	CSTF1		30.5348	30.2794	30.6788	30.2646	30.51	30.1448	30.3126	30.4189
P33240;P33240-2	Cleavage stimulation factor subunit 2	CSTF2		29.9716	29.4829	30.6215	29.3856	30.1586	29.7189	30.4817	29.3014
Q9H0L4	Cleavage stimulation factor subunit 2 tau variant	CSTF2T		31.2833	30.6523	31.296	31.0407	30.7542	30.9083	30.7201	30.674
Q12996	Cleavage stimulation factor subunit 3	CSTF3		30.8364	30.5163	31.3819	30.3827	30.8243	30.1624	31.1981	30.5404
Q13363;Q13363-2	C-terminal-binding protein 1	CTBP1		32.3927	31.603	32.3468	31.6162	32.4293	31.2616	31.8284	31.6746
P56545-2;P56545	C-terminal-binding protein 2	CTBP2		31.7585	32.1502	31.9226	31.8359	31.6139	31.9797	31.4703	31.7269
Q01459	Di-N-acetylchitobiase	CTBS	1	29.7952	29.3953	29.0091	28.9357	29.9007	29.008	30.1392	29.3154
P49711;P49711-2	Transcriptional repressor CTCF	CTCF		29.1135	29.0221	29.7945	29.0807	30.3444	29.3202	30.2223	27.972
O95476	CTD nuclear envelope phosphatase 1	CTDNEP1		28.0999	27.3073	27.582	27.6782	29.3075	25.1448	27.81	27.3347
Q9Y5B0;Q9Y5B0-4	RNA polymerase II subunit A C-terminal domain phosphatase	CTDP1		29.8838	29.0011	29.6439	29.2852	29.7673	29.1941	29.7867	29.0751
Q9GZU7-2;Q9GZU7;Q9GZU7-3	Carboxy-terminal domain RNA polymerase II polypeptide A small phosphatase 1	CTDSP1		27.0249	27.1944	26.3611	26.9278	26.8503	26.5576	26.5936	26.235
O15194;O15194-2	CTD small phosphatase-like protein	CTDSPL		26.7686	25.6213	27.0087	26.6003	27.4696	26.7121	26.2702	26.5423
Q16619;Q16619-2	Cardiotrophin-1	CTF1		27.0888	26.5378	26.5238	25.6707	27.5139	27.2029	26.0345	26.3489
P29279;P29279-2	Connective tissue growth factor	CTGF		30.4143	30.3279	30.5604	31.0524	30.5757	30.3061	33.2822	33.6477
P32929;P32929-3;P32929-2	Cystathionine gamma-lyase	CTH		26.361	26.6369	NaN	25.8715	NaN	26.4956	26.6699	26.2782
Q96CG8;Q96CG8-3	Collagen triple helix repeat-containing protein 1	CTHRC1		32.5067	31.7493	33.1762	32.6775	30.5098	30.0194	32.1	31.7981
O43310	CBP80/20-dependent translation initiation factor	CTIF		30.0064	29.93	29.7924	30.0091	29.9691	30.0074	30.2999	30.2281
P35221;P35221-2;P35221-3	Catenin alpha-1	CTNNA1		34.0686	34.2479	34.1751	34.6896	34.0285	34.7716	34.3314	35.0713
P26232;P26232-2;P26232-5;P26232-3;P26232-4;P26232-6	Catenin alpha-2	CTNNA2		29.0654	28.21	27.8627	27.1911	26.6464	27.1313	27.9539	27.7814
Q9UBT7;Q9UBT7-2;Q9UBT7-3	Alpha-catulin	CTNNAL1		28.1462	25.2875	29.5775	28.2936	28.7513	26.3131	28.0605	24.8009
P35222	Catenin beta-1	CTNNB1		33.1008	33.464	33.222	33.4257	33.2504	33.3683	33.4379	33.9904
Q8WYA6;Q8WYA6-4;Q8WYA6-3;Q8WYA6-2	Beta-catenin-like protein 1	CTNNBL1		29.1193	29.9207	29.4598	29.7725	29.327	29.8852	29.3862	30.1712
O60716-3;O60716-5;O60716;O60716-2;O60716-8;O60716-7;O60716-4;O60716-6;O60716-13;O60716-11;O60716-10;O60716-9;O60716-21;O60716-19;O60716-16;O60716-18;O60716-15;O60716-17;O60716-14;O60716-12;O60716-24;O60716-23;O60716-22;O60716-20;O60716-29;O60716-27;O60716-26;O60716-25;O60716-32;O60716-31;O60716-30;O60716-28	Catenin delta-1	CTNND1		33.7417	33.4969	33.7724	33.865	33.8082	33.6355	34.2177	34.4383
P17812;P17812-2	CTP synthase 1	CTPS1		31.7624	31.8974	32.1093	32.3043	31.8135	32.5884	32.3662	33.3135
Q9NRF8	CTP synthase 2	CTPS2		29.4235	29.4129	29.1202	29.1001	29.2932	29.416	29.2797	28.8054
Q6PD62	RNA polymerase-associated protein CTR9 homolog	CTR9		29.5413	29.3659	29.8719	29.578	29.8865	29.5919	30.1696	30.0868
P10619;P10619-2	Lysosomal protective protein;Lysosomal protective protein 32 kDa chain;Lysosomal protective protein 20 kDa chain	CTSA	1	33.6626	33.9386	33.1539	33.6177	33.3619	33.5436	33.2258	33.9456
P07858	Cathepsin B;Cathepsin B light chain;Cathepsin B heavy chain	CTSB	1	36.3299	36.0491	36.3137	36.4919	36.1019	36.2922	35.6325	35.6842
P53634	Dipeptidyl peptidase 1;Dipeptidyl peptidase 1 exclusion domain chain;Dipeptidyl peptidase 1 heavy chain;Dipeptidyl peptidase 1 light chain	CTSC	1	30.6791	30.1544	30.9395	31.5281	30.1627	29.6981	29.3208	28.8673
P07339	Cathepsin D;Cathepsin D light chain;Cathepsin D heavy chain	CTSD	1	34.8501	34.7718	34.506	35.2665	35.042	35.0618	35.3158	35.4165
Q9UBX1	Cathepsin F	CTSF		25.2231	25.4474	25.2149	25.035	25.1962	25.1052	24.6434	NaN
P43235	Cathepsin K	CTSK		32.8107	32.3387	32.7012	32.1001	33.1439	32.4053	33.0621	31.5372
P07711	Cathepsin L1;Cathepsin L1 heavy chain;Cathepsin L1 light chain	CTSL	1	31.6395	32.117	31.8299	32.4468	31.8768	32.1896	31.6132	31.2371
P43234	Cathepsin O	CTSO		25.7604	26.1256	25.8779	25.8573	26.261	24.6203	26.2357	24.8302
P25774;P25774-2	Cathepsin S	CTSS		28.8514	27.3441	28.365	25.9803	28.2482	25.2452	28.5724	23.9435
Q9UBR2	Cathepsin Z	CTSZ	1	32.8462	32.1118	33.1764	32.7482	33.9853	33.5898	32.7223	32.8479
Q14247;Q14247-3;Q14247-2	Src substrate cortactin	CTTN		35.2043	35.5443	34.993	35.5863	35.1329	35.5608	35.03	35.3092
Q9P2B4	CTTNBP2 N-terminal-like protein	CTTNBP2NL		31.2162	30.8752	31.2283	31.1122	31.17	31.1161	31.983	31.5819
Q7Z7A3	Cytoplasmic tRNA 2-thiolation protein 1	CTU1		25.2291	24.6681	26.765	24.8497	26.2665	25.3047	26.8993	25.7661
Q2VPK5;Q2VPK5-3;Q2VPK5-5	Cytoplasmic tRNA 2-thiolation protein 2	CTU2		26.6002	27.343	26.4694	27.0477	26.8	26.885	26.2572	26.7838
Q9NWM3;Q9NWM3-2	CUE domain-containing protein 1	CUEDC1		28.527	27.2325	28.2313	26.7788	27.8088	27.0587	27.7475	27.3533
Q9H467	CUE domain-containing protein 2	CUEDC2		25.734	25.9997	26.9191	26.3005	27.109	27.2933	25.4535	26.8368
Q13616	Cullin-1	CUL1		31.5793	31.4166	31.7332	31.4828	31.6329	31.3223	31.2941	31.5265
Q13617;Q13617-2	Cullin-2	CUL2		31.8039	31.3949	31.6478	31.5766	31.3573	31.2995	31.3536	31.0516
Q13618;Q13618-2;Q13618-3	Cullin-3	CUL3		31.5888	31.5193	31.6989	31.6201	31.8807	31.6373	31.7723	31.7046
Q13619;Q13619-2	Cullin-4A	CUL4A		31.6444	30.979	31.8313	31.2972	31.5674	31.4162	31.2335	31.0406
Q13620-1;Q13620	Cullin-4B	CUL4B		33.3118	33.4502	33.3732	33.4785	32.7899	33.3696	33.1654	33.3308
Q93034	Cullin-5	CUL5		32.0836	31.6097	31.8064	31.2994	31.7538	31.4297	31.7772	31.5367
Q14999-2	Cullin-7	CUL7		30.4895	30.1633	30.7285	29.9927	30.7909	30.4614	30.5462	30.2546
Q14999	Cullin-7	CUL7		26.6853	25.9433	NaN	26.4901	25.8235	26.5016	26.346	26.0352
O60888;O60888-3;O60888-2	Protein CutA	CUTA		31.2265	31.4224	31.254	31.1964	31.1174	32.0643	30.6483	31.6917
Q9NTM9	Copper homeostasis protein cutC homolog	CUTC		26.5162	26.1088	26.3523	26.0347	26.1727	26.3878	24.9048	26.342
Q13948;Q13948-2;P39880-9;Q13948-10	Protein CASP;Homeobox protein cut-like 1	CUX1		29.94	29.8178	30.0132	29.8395	30.0656	29.3948	30.29	30.0947
Q9P013	Spliceosome-associated protein CWC15 homolog	CWC15		29.2047	28.3074	29.666	28.3647	28.7961	29.0846	29.3741	28.7813
Q9HCG8	Pre-mRNA-splicing factor CWC22 homolog	CWC22		28.4042	27.8207	28.7601	28.4375	28.7214	28.4036	28.491	28.0236
Q6UX04;Q6UX04-2	Peptidyl-prolyl cis-trans isomerase CWC27 homolog	CWC27		30.4864	28.8276	30.3446	29.1821	30.3222	29.2353	29.8839	29.0465
Q69YN2;Q69YN2-3	CWF19-like protein 1	CWF19L1		27.9682	28.9495	28.0609	28.8163	27.3963	28.3995	27.2961	27.8868
P48061;P48061-4;P48061-2;P48061-5;P48061-6;P48061-3	Stromal cell-derived factor 1;SDF-1-beta(3-72);SDF-1-alpha(3-67)	CXCL12		27.6525	26.7165	27.6186	26.9407	27.0203	26.1172	26.8509	26.9062
Q8TB03;Q8TB03-3	Uncharacterized protein CXorf38	CXorf38		26.3985	26.2661	26.031	25.7269	26.965	25.8092	26.6237	26.0112
Q9H5V9;Q9H5V9-3;Q9H5V9-2	UPF0428 protein CXorf56	CXorf56		26.2198	25.3954	25.7222	25.5724	25.4285	24.7269	24.8284	25.74
Q9P0U4;Q9P0U4-2	CXXC-type zinc finger protein 1	CXXC1		28.1073	26.9666	28.2665	26.8055	27.2398	27.9187	28.5803	27.4995
P49447	Cytochrome b561	CYB561		26.8921	27.2916	27.0713	27.4983	26.8838	27.9461	26.6106	27.1923
O14569	Cytochrome b561 domain-containing protein 2	CYB561D2		28.6747	29.2622	28.6427	28.6065	28.6922	29.6791	28.2029	29.2797
P00167;P00167-2;P00167-3	Cytochrome b5	CYB5A		33.6062	33.4668	33.6151	33.5602	33.6036	33.5066	33.2976	32.6824
O43169	Cytochrome b5 type B	CYB5B		32.1493	32.5048	32.1739	32.5254	32.1842	32.856	32.024	32.7258
Q8WUJ1;Q8WUJ1-3	Neuferricin	CYB5D2		24.5905	25.2841	25.3731	24.3531	26.4923	24.8388	25.5956	22.7532
Q9UHQ9	NADH-cytochrome b5 reductase 1	CYB5R1		31.7983	31.9475	31.713	32.0871	31.5605	31.9127	31.5901	31.6589
Q6BCY4;Q6BCY4-2	NADH-cytochrome b5 reductase 2	CYB5R2		29.5839	28.6186	29.4968	29.3766	29.4778	28.8229	29.265	28.8881
P00387;P00387-2;P00387-3	NADH-cytochrome b5 reductase 3;NADH-cytochrome b5 reductase 3 membrane-bound form;NADH-cytochrome b5 reductase 3 soluble form	CYB5R3		36.1913	36.3478	36.0681	36.2453	36.0088	36.1016	36.0291	36.1668
Q7L1T6	Cytochrome b5 reductase 4	CYB5R4		27.9409	26.5574	28.1189	26.5578	27.8544	27.2048	28.1091	25.892
P13498	Cytochrome b-245 light chain	CYBA		27.5417	26.7283	27.5533	26.8284	NaN	26.6862	26.4686	24.7176
Q53TN4;Q53TN4-3	Cytochrome b reductase 1	CYBRD1		32.5393	32.2589	31.9638	31.4476	32.064	31.8767	32.2042	31.8165
P08574	Cytochrome c1, heme protein, mitochondrial	CYC1		30.8927	31.7358	30.9364	31.7065	31.0994	31.929	30.9307	31.1089
P99999	Cytochrome c	CYCS		29.7694	30.1988	29.6587	29.5711	30.098	29.9709	30.4721	30.3415
Q7L576;Q7L576-2	Cytoplasmic FMR1-interacting protein 1	CYFIP1		33.7325	33.5195	33.7142	33.5333	33.7917	33.4692	33.4222	33.132
Q96F07-2;Q96F07	Cytoplasmic FMR1-interacting protein 2	CYFIP2		28.3032	26.5047	28.4112	NaN	28.2913	26.5693	28.7961	NaN
Q8WWM9	Cytoglobin	CYGB		29.47	30.0188	27.694	28.7509	28.4521	28.7237	30.3211	30.8045
Q6ZMK1;Q6ZMK1-2;Q6ZMK1-4	Cysteine and histidine-rich protein 1	CYHR1		26.0908	27.0563	26.2163	27.0477	26.0002	27.2237	25.6453	26.6415
Q9NQC7;Q9NQC7-2	Ubiquitin carboxyl-terminal hydrolase CYLD	CYLD		29.5173	29.2544	29.9083	29.0975	29.9432	29.1385	29.0314	28.2993
Q16678	Cytochrome P450 1B1	CYP1B1		32.3489	31.3598	32.0328	32.0194	30.9313	30.686	31.207	30.8102
Q6UW02;Q6UW02-2	Cytochrome P450 20A1	CYP20A1		31.1921	31.4874	31.2058	31.4308	31.0691	31.1216	31.511	32.0933
Q9NR63;Q9NR63-2;Q9NR63-3	Cytochrome P450 26B1	CYP26B1		24.0856	22.5904	NaN	21.8141	NaN	22.6274	NaN	NaN
Q02318	Sterol 26-hydroxylase, mitochondrial	CYP27A1		28.9371	29.0378	29.2305	29.0493	29.416	29.5067	29.0289	29.0264
Q7Z449	Cytochrome P450 2U1	CYP2U1		28.1538	27.7079	28.099	28.1561	28.0713	27.9564	28.2305	27.7895
Q6ZWL3;Q6ZWL3-2	Cytochrome P450 4V2	CYP4V2		26.3796	25.4529	26.9275	27.4835	28.0585	26.9859	27.3825	25.7689
Q16850;Q16850-2	Lanosterol 14-alpha demethylase	CYP51A1		31.3588	31.5476	31.4809	31.2661	31.8088	31.8015	31.4705	31.5641
O75881	25-hydroxycholesterol 7-alpha-hydroxylase	CYP7B1		24.6254	23.652	NaN	NaN	25.8734	NaN	22.2099	NaN
O00622	Protein CYR61	CYR61		29.7326	30.3503	29.8953	30.28	30.1741	30.1538	31.4266	31.3307
Q9H1C7	Cysteine-rich and transmembrane domain-containing protein 1	CYSTM1		26.4184	25.4363	26.5566	26.1023	28.1343	26.4569	28.7524	27.1356
O43739;O43739-2	Cytohesin-3	CYTH3		29.4236	28.9157	29.6417	29.136	29.5057	29.4692	29.9725	29.385
Q8N465;Q8N465-2;Q8N465-3	D-2-hydroxyglutarate dehydrogenase, mitochondrial	D2HGDH		27.1254	26.3431	25.4507	25.7594	25.1993	25.6387	26.1233	24.1483
Q9Y4D1;Q9Y4D1-2;Q9Y4D1-3	Disheveled-associated activator of morphogenesis 1	DAAM1		26.8344	26.3468	26.7723	27.0217	26.6694	26.5249	27.2727	27.4424
Q86T65;Q86T65-4	Disheveled-associated activator of morphogenesis 2	DAAM2		27.0731	27.5532	28.1776	29.3509	28.5195	28.4172	28.9242	28.7947
O75553-4;O75553-5	Disabled homolog 1	DAB1		23.8076	23.9459	25.9303	25.3338	23.7873	24.1216	21.797	24.091
P98082;P98082-3;P98082-2	Disabled homolog 2	DAB2		34.0849	34.0174	33.8003	33.7397	33.8628	33.8243	33.9349	33.8813
Q5VWQ8;Q5VWQ8-2;Q5VWQ8-4;Q5VWQ8-5;Q5VWQ8-3	Disabled homolog 2-interacting protein	DAB2IP		27.6678	28.0246	28.3463	28.8689	29.3404	29.3708	28.3885	28.1583
P61803	Dolichyl-diphosphooligosaccharide--protein glycosyltransferase subunit DAD1	DAD1		31.8329	32.3464	31.4831	31.892	31.5939	31.9409	31.3506	32.2869
Q14118	Dystroglycan;Alpha-dystroglycan;Beta-dystroglycan	DAG1		32.3632	31.6093	32.5611	32.1786	32.0572	32.05	31.9848	32.0034
Q8NCG7;Q8NCG7-4;Q8NCG7-2	Sn1-specific diacylglycerol lipase beta	DAGLB		29.439	29.6405	29.8829	29.5205	29.0518	29.1206	29.1091	29.605
Q3LXA3;Q3LXA3-2	Bifunctional ATP-dependent dihydroxyacetone kinase/FAD-AMP lyase (cyclizing);ATP-dependent dihydroxyacetone kinase;FAD-AMP lyase (cyclizing)	DAK		30.7637	30.5652	30.85	30.9836	31.1103	31.0767	30.2196	30.3233
Q5D0E6;Q5D0E6-4;Q5D0E6-2	DALR anticodon-binding domain-containing protein 3	DALRD3		25.4695	NaN	25.0566	NaN	25.9307	25	25.0089	24.4851
P51397	Death-associated protein 1	DAP		30.7372	31.4306	30.7537	31.6764	31.5309	32.3134	30.2985	31.3452
P51398;P51398-2;P51398-3	28S ribosomal protein S29, mitochondrial	DAP3		30.8829	30.2286	30.9559	30.3245	30.3978	29.7594	30.6423	29.9661
P53355;P53355-3;P53355-4	Death-associated protein kinase 1	DAPK1		NaN	NaN	27.2137	27.4604	27.4738	26.674	27.5904	26.6331
Q9UIK4;Q9UIK4-2	Death-associated protein kinase 2	DAPK2		27.5884	25.8989	27.2968	26.3888	28.2486	27.0794	27.7866	26.8124
O43293	Death-associated protein kinase 3	DAPK3		29.5762	28.9082	30.0229	29.8948	29.4839	29.2171	30.1046	30.3027
P14868;P14868-2	Aspartate--tRNA ligase, cytoplasmic	DARS		34.256	34.1644	34.2859	34.1909	34.2178	34.3534	34.2014	34.194
Q6PI48	Aspartate--tRNA ligase, mitochondrial	DARS2		30.5433	30.3845	29.9924	30.3078	30.2785	30.035	30.0788	30.509
Q9UER7;Q9UER7-2;Q9UER7-3;Q9UER7-4;Q9UER7-5	Death domain-associated protein 6	DAXX		26.6284	26.1727	27.2007	26.31	26.3944	25.7846	26.993	25.5096
Q96EP5;Q96EP5-2	DAZ-associated protein 1	DAZAP1		31.7346	31.6819	31.7861	31.2801	31.557	31.3959	32.2706	31.6154
P07108;P07108-3;P07108-2;P07108-4	Acyl-CoA-binding protein	DBI		33.9571	33.6431	33.6707	33.7375	34.2788	33.8877	33.4446	34.2529
Q16643;Q16643-2	Drebrin	DBN1		35.224	35.4431	35.1696	35.3641	34.5642	34.9981	35.2663	35.3569
Q9UJU6;Q9UJU6-5	Drebrin-like protein	DBNL		33.3342	33.6804	33.4292	33.824	33.0886	33.6305	33.1475	33.3009
Q9UJU6-3	Drebrin-like protein	DBNL		27.5495	26.0652	26.351	26.0165	26.7427	26.1132	26.527	26.2543
Q9UK59	Lariat debranching enzyme	DBR1		30.0309	29.3267	29.4392	29.5155	29.4081	29.458	29.7398	28.9346
P11182	Lipoamide acyltransferase component of branched-chain alpha-keto acid dehydrogenase complex, mitochondrial	DBT		30.8363	31.0175	30.3433	31.1534	30.7128	30.7512	30.796	31.2414
Q5QP82;Q5QP82-2	DDB1- and CUL4-associated factor 10	DCAF10		27.4269	26.2248	27.8806	26.8213	27.4425	26.4955	27.4022	26.3831
Q8TEB1;Q8TEB1-2	DDB1- and CUL4-associated factor 11	DCAF11		28.0259	27.2687	28.3485	27.6795	27.9969	27.4786	27.9573	26.9382
Q9NV06	DDB1- and CUL4-associated factor 13	DCAF13		29.2454	29.3807	29.1482	29.2254	29.0505	29.0618	29.0338	29.6951
Q9NXF7	DDB1- and CUL4-associated factor 16	DCAF16		25.6988	25.2652	26.117	25.9875	25.1262	25.5197	25.3853	25.3292
Q96JK2;Q96JK2-3;Q96JK2-2	DDB1- and CUL4-associated factor 5	DCAF5		26.2641	26.294	27.1544	26.277	26.8941	26.924	26.9179	25.6957
Q58WW2;Q58WW2-4;Q58WW2-3	DDB1- and CUL4-associated factor 6	DCAF6		28.2918	27.7864	28.8771	28.1748	28.6904	28.107	29.0239	27.5636
P61962	DDB1- and CUL4-associated factor 7	DCAF7		29.9664	29.6451	30.095	30.0718	29.8595	29.7678	30.25	29.8428
Q5TAQ9	DDB1- and CUL4-associated factor 8	DCAF8		29.9675	29.8984	30.1618	30.0898	30.0645	30.0783	29.3886	29.5037
Q8WVC6	Dephospho-CoA kinase domain-containing protein	DCAKD		29.3282	28.2896	28.577	27.1135	29.2627	28.4081	28.9192	28.4711
Q8N8Z6	Discoidin, CUB and LCCL domain-containing protein 1	DCBLD1		24.9957	23.7687	27.0066	25.359	26.0729	24.9811	27.4092	26.5207
Q96PD2-2;Q96PD2	Discoidin, CUB and LCCL domain-containing protein 2	DCBLD2		29.65	29.5501	29.3559	28.6673	29.0107	29.0288	28.7012	28.5124
Q96JQ0	Protocadherin-16	DCHS1		24.3028	22.4728	22.2035	22.5529	NaN	21.9775	23.3473	NaN
P27707	Deoxycytidine kinase	DCK		28.5272	29.3833	29.1338	29.0565	28.7944	29.2201	28.7629	28.9391
O15075;O15075-2	Serine/threonine-protein kinase DCLK1	DCLK1		31.4391	30.8917	28.7407	29.1598	31.7243	31.3366	30.244	28.925
P07585;P07585-2	Decorin	DCN		32.5308	32.3803	32.1737	31.6219	32.2695	31.6762	31.1706	30.2266
Q9NPI6;Q9NPI6-2	mRNA-decapping enzyme 1A	DCP1A		29.5991	28.9811	30.077	29.2722	29.7413	29.5693	29.7981	29.3118
Q8IZD4;Q8IZD4-2	mRNA-decapping enzyme 1B	DCP1B		29.1805	27.7395	29.0427	28.0585	29.0436	27.4914	26.9821	27.2329
Q96C86	m7GpppX diphosphatase	DCPS		30.3273	30.1392	30.4401	30.3353	30.9157	30.1242	29.862	29.9545
P32321-2;P32321	Deoxycytidylate deaminase	DCTD		31.7737	32.1548	31.593	32.0225	31.708	31.9642	31.1355	31.6924
Q14203-3;Q14203;Q14203-6;Q14203-4;Q14203-5;Q14203-2	Dynactin subunit 1	DCTN1		34.5741	34.6147	34.5913	34.6164	34.7691	34.8386	34.4372	34.7185
Q13561;Q13561-3;Q13561-2	Dynactin subunit 2	DCTN2		34.2512	34.4489	34.324	34.9686	34.2437	34.8905	33.9638	34.7536
O75935;O75935-3;O75935-2	Dynactin subunit 3	DCTN3		31.8336	31.9783	31.6659	31.9072	31.5679	31.7837	31.316	31.7248
Q9UJW0;Q9UJW0-3;Q9UJW0-2	Dynactin subunit 4	DCTN4		32.2543	32.1618	32.15	32.6544	32.3688	32.6224	32.3657	32.2839
Q9BTE1;Q9BTE1-2;Q9BTE1-3	Dynactin subunit 5	DCTN5		28.4802	29.5043	28.4682	29.9153	28.512	31.1007	28.6535	29.2268
O00399	Dynactin subunit 6	DCTN6		28.9391	30.1415	29.2069	29.4328	28.9866	29.3936	30.0967	29.7311
Q9H773	dCTP pyrophosphatase 1	DCTPP1		28.4239	27.6408	27.9918	26.7698	27.899	27.3666	27.8954	27.3985
Q96GG9	DCN1-like protein 1	DCUN1D1		30.106	28.7809	30.0746	28.98	29.9093	28.5013	30.0962	28.8317
Q8IWE4	DCN1-like protein 3	DCUN1D3		29.421	29.3801	29.2445	29.5007	29.4698	29.2749	29.4055	29.0976
Q9BTE7	DCN1-like protein 5	DCUN1D5		29.7272	28.7518	30.1981	29.5295	29.2932	27.5946	29.6966	29.1425
Q7Z4W1	L-xylulose reductase	DCXR		29.4289	29.8198	28.9113	29.4559	29.3242	29.7007	28.6364	29.1333
Q9BW61	DET1- and DDB1-associated protein 1	DDA1		27.1355	27.5218	27.3036	28.2257	26.9333	27.4825	28.8336	27.4894
O94760;O94760-2	N(G),N(G)-dimethylarginine dimethylaminohydrolase 1	DDAH1		34.6102	34.6722	33.6246	34.0787	33.912	34.3216	32.0095	32.3624
O95865	N(G),N(G)-dimethylarginine dimethylaminohydrolase 2	DDAH2		32.1977	32.2293	31.6933	32.1983	32.0852	31.9947	31.9739	32.4559
Q16531	DNA damage-binding protein 1	DDB1		34.3454	34.2063	34.4279	34.2395	34.1475	34.034	33.9378	33.9795
Q92466;Q92466-4;Q92466-2;Q92466-5	DNA damage-binding protein 2	DDB2		28.9988	28.5418	29.0248	29.1466	29.0845	28.3405	28.4255	28.4681
Q8NEL9-2;Q8NEL9-4;Q8NEL9;Q8NEL9-3	Phospholipase DDHD1	DDHD1		27.8853	27.3854	26.945	25.979	27.6174	26.5475	28.2102	27.0766
O94830;O94830-2	Phospholipase DDHD2	DDHD2		27.8454	27.6672	28.2465	27.5909	27.8525	28.0192	28.0823	27.4692
Q5TDH0;Q5TDH0-3;Q5TDH0-2	Protein DDI1 homolog 2	DDI2		29.299	28.4075	29.5936	29.0891	29.9691	29.139	29.9417	29.0521
P39656;P39656-3;P39656-2	Dolichyl-diphosphooligosaccharide--protein glycosyltransferase 48 kDa subunit	DDOST		34.046	34.255	33.8939	34.0807	33.9797	34.0519	33.901	34.5028
Q16832	Discoidin domain-containing receptor 2	DDR2		31.4692	31.6108	31.2237	31.6799	30.9526	31.6302	31.8922	32.1545
Q96HY6;Q96HY6-2	DDRGK domain-containing protein 1	DDRGK1		30.5245	30.6983	30.3112	31.208	30.3284	30.964	30.9634	30.9923
P30046;A6NHG4;P30046-2	D-dopachrome decarboxylase;D-dopachrome decarboxylase-like protein	DDT;DDTL		32.2143	31.8282	31.5976	31.7598	31.7626	31.2584	31.4026	30.9258
Q92499;Q92499-3;Q92499-2	ATP-dependent RNA helicase DDX1	DDX1		34.2793	34.4804	34.2089	34.4487	34.3588	34.5052	34.4653	34.782
Q13206	Probable ATP-dependent RNA helicase DDX10	DDX10		28.1381	29.1816	28.7884	28.5133	28.8473	27.7477	28.8227	29.3937
Q92841;Q92841-3;Q92841-1;Q92841-2	Probable ATP-dependent RNA helicase DDX17	DDX17		34.7282	34.7072	34.7938	34.5823	34.4768	34.6041	34.6143	34.4712
Q9NVP1	ATP-dependent RNA helicase DDX18	DDX18		30.3299	29.8492	30.4219	30.0025	29.9588	29.7471	30.6973	30.5669
Q9NUU7;Q9NUU7-2	ATP-dependent RNA helicase DDX19A	DDX19A		29.5928	28.9966	29.5601	29.0062	29.2953	29.0364	29.3284	28.5509
Q9UMR2;Q9UMR2-2;Q9UMR2-4;Q9UMR2-3	ATP-dependent RNA helicase DDX19B	DDX19B		31.9633	32.3249	31.8961	32.3693	32.0076	32.2158	31.4651	32.0996
Q9UHI6	Probable ATP-dependent RNA helicase DDX20	DDX20		29.3967	29.4137	29.4792	29.4723	29.5123	29.5815	29.3598	29.6909
Q9NR30;Q9NR30-2	Nucleolar RNA helicase 2	DDX21		31.017	31.6401	31.6692	31.6767	31.3364	31.7082	32.1008	32.2086
Q9BUQ8	Probable ATP-dependent RNA helicase DDX23	DDX23		31.334	31.3426	31.5442	31.1322	31.4911	31.2611	31.4761	31.2475
Q9GZR7;Q9GZR7-2	ATP-dependent RNA helicase DDX24	DDX24		30.3121	30.3502	30.767	30.5375	30.2846	30.3467	30.855	30.5358
Q96GQ7	Probable ATP-dependent RNA helicase DDX27	DDX27		30.4236	30.1822	30.3606	30.121	29.4204	29.4938	29.4483	30.1941
Q9NUL7	Probable ATP-dependent RNA helicase DDX28	DDX28		25.6067	25.5881	25.5659	26.0451	25.2052	24.5218	25.8485	26.1656
Q9H8H2;Q9H8H2-2;Q9H8H2-4	Probable ATP-dependent RNA helicase DDX31	DDX31		28.6624	28.4344	28.9949	28.545	28.7122	27.6502	29.3889	29.0761
O00148;O00148-2;O00148-3	ATP-dependent RNA helicase DDX39A	DDX39A		31.0769	30.5808	31.8776	30.9077	31.3742	30.8615	31.5217	31.4348
Q13838;Q13838-2	Spliceosome RNA helicase DDX39B	DDX39B		34.002	33.931	33.943	33.989	33.9625	33.9228	33.8773	34.2331
O00571;O00571-2	ATP-dependent RNA helicase DDX3X	DDX3X		34.454	34.4471	34.2914	34.0811	34.4117	34.2804	34.5353	34.8713
Q9UJV9	Probable ATP-dependent RNA helicase DDX41	DDX41		29.3357	28.841	29.5126	28.803	29.651	28.6462	29.7868	28.5224
Q86XP3;Q86XP3-2	ATP-dependent RNA helicase DDX42	DDX42		31.8721	32.0301	31.8391	32.0916	31.7808	32.343	32.058	32.3115
Q7L014	Probable ATP-dependent RNA helicase DDX46	DDX46		31.956	31.8583	32.2849	32.0987	32.1186	32.0827	32.0203	32.0864
Q9H0S4;Q9H0S4-2	Probable ATP-dependent RNA helicase DDX47	DDX47		28.8898	29.4377	29.5419	29.245	29.0186	29.178	29.4446	29.5409
P17844;P17844-2	Probable ATP-dependent RNA helicase DDX5	DDX5		33.4623	33.4565	33.7208	33.7931	33.9092	33.8419	34.2386	33.5877
Q9BQ39	ATP-dependent RNA helicase DDX50	DDX50		29.9727	29.4601	30.1473	29.7647	30.0243	29.5631	30.0751	29.82
Q8N8A6	ATP-dependent RNA helicase DDX51	DDX51		26.9684	27.7896	27.9512	27.7025	28.4186	27.4075	28.2273	28.3083
Q9Y2R4	Probable ATP-dependent RNA helicase DDX52	DDX52		28.9859	29.5689	29.2225	29.374	29.0123	28.8424	29.578	31.3433
Q8TDD1;Q8TDD1-2	ATP-dependent RNA helicase DDX54	DDX54		30.1258	30.0074	30.2082	30.1503	29.9397	29.6266	30.3367	30.1633
Q8NHQ9	ATP-dependent RNA helicase DDX55	DDX55		25.6328	24.5667	26.133	24.9537	25.1869	24.7033	26.7828	25.7732
Q9NY93;Q9NY93-2	Probable ATP-dependent RNA helicase DDX56	DDX56		28.0238	28.7009	28.6775	28.7829	28.0356	28.3431	28.2222	28.813
O95786;O95786-2	Probable ATP-dependent RNA helicase DDX58	DDX58		29.897	27.8278	29.7581	28.7314	30.0356	28.917	29.7494	28.9097
Q5T1V6;Q5T1V6-2	Probable ATP-dependent RNA helicase DDX59	DDX59		27.0225	26.3108	26.7562	25.3325	26.9809	26.1301	26.5293	26.3595
P26196	Probable ATP-dependent RNA helicase DDX6	DDX6		33.5506	33.1972	33.5735	33.3396	33.3431	33.0308	33.599	33.0774
Q8IY21	Probable ATP-dependent RNA helicase DDX60	DDX60		26.7821	26.6843	26.942	26.5069	26.8513	27.0466	26.7208	26.5545
Q16698;Q16698-2	2,4-dienoyl-CoA reductase, mitochondrial	DECR1		32.9671	32.9725	32.9002	32.942	32.727	33.0895	32.6483	33.1064
Q9NUI1;Q9NUI1-3	Peroxisomal 2,4-dienoyl-CoA reductase	DECR2		29.4944	29.81	29.4022	29.7146	29.1001	29.4483	29.8277	30.3686
Q6ZN54;Q6ZN54-4;Q6ZN54-3;Q6ZN54-5;Q6ZN54-6	Differentially expressed in FDCP 8 homolog	DEF8		26.3316	26.7652	26.4437	27.4741	26.0605	26.0303	27.1687	27.5633
O15121	Sphingolipid delta(4)-desaturase DES1	DEGS1		29.7719	30.1892	29.8158	29.4761	29.973	29.149	30.2741	30.728
P35659;P35659-2	Protein DEK	DEK		31.6972	31.9894	31.7748	31.9115	31.4556	32.0611	31.5188	31.6683
Q8TEH3;Q8TEH3-6;Q8TEH3-7	DENN domain-containing protein 1A	DENND1A		26.3089	26.6498	26.889	28.0634	26.7176	26.8699	25.5419	25.328
Q9ULE3;Q9ULE3-2	DENN domain-containing protein 2A	DENND2A		29.071	26.612	27.0892	26.324	27.4643	26.0276	26.6378	NaN
A2RUS2;A2RUS2-2	DENN domain-containing protein 3	DENND3		29.0289	29.2882	28.0538	28.2228	28.3988	28.5091	26.7037	26.2471
Q7Z401;Q7Z401-2	C-myc promoter-binding protein	DENND4A		32.2456	30.5235	32.0458	28.2032	31.2917	28.5386	30.4279	32.1769
Q5VZ89;Q5VZ89-6;Q5VZ89-5	DENN domain-containing protein 4C	DENND4C		29.5923	30.0807	29.6665	30.0093	29.6538	30.0885	29.6182	29.7744
Q6IQ26;Q6IQ26-2	DENN domain-containing protein 5A	DENND5A		27.6494	27.4394	27.7765	27.4704	28.1207	27.9711	27.5891	26.8116
O43583	Density-regulated protein	DENR		31.3117	31.1734	31.1958	30.9507	31.0354	30.5851	31.0521	30.9584
O75140;O75140-1;O75140-4;O75140-9;O75140-8;O75140-3;O75140-5;O75140-6;O75140-7	DEP domain-containing protein 5	DEPDC5		26.7894	25.6635	26.7402	25.8458	26.1663	25.6437	26.1967	25.861
Q8TB45;Q8TB45-2	DEP domain-containing mTOR-interacting protein	DEPTOR		28.744	27.5635	29.7272	29.3249	28.1477	26.7138	30.783	30.6053
Q9Y315	Deoxyribose-phosphate aldolase	DERA		31.1325	31.4064	30.64	31.3827	30.6687	30.7375	30.3468	30.6116
Q9BUN8;Q9BUN8-2	Derlin-1	DERL1		25.5126	28.0895	26.612	27.9795	25.4416	27.4792	26.1718	28.0128
Q9GZP9	Derlin-2	DERL2		29.5992	28.7346	29.8469	29.2049	29.6361	28.2833	29.9666	29.3365
P17661	Desmin	DES		32.2882	32.3224	33.066	32.9563	31.8758	32.1065	34.4405	33.601
Q9BSY9;Q9BSY9-2	Desumoylating isopeptidase 2	DESI2		23.884	26.4314	24.7345	26.6162	24.8815	24.8102	24.9264	25.8657
O00273	DNA fragmentation factor subunit alpha	DFFA		31.8243	31.666	32.0096	31.4527	31.5645	31.5518	31.6111	31.0883
O00273-2	DNA fragmentation factor subunit alpha	DFFA		24.9927	25.0701	25.4764	25.0629	25.2935	NaN	25.0002	24.878
O60443;O60443-3	Non-syndromic hearing impairment protein 5	DFNA5		30.6853	30.7279	30.8361	31.3834	30.951	31.0725	30.7342	31.0397
O75907	Diacylglycerol O-acyltransferase 1	DGAT1		27.5198	27.3678	27.3567	27.4832	27.619	27.6623	27.6369	27.4465
Q96DF8	Protein DGCR14	DGCR14		27.6086	26.8497	27.523	26.6782	27.4635	26.3961	27.289	NaN
Q8WYQ5;Q8WYQ5-3	Microprocessor complex subunit DGCR8	DGCR8		26.6428	25.6734	26.9116	25.0883	26.709	26.64	26.6065	24.9855
P23743	Diacylglycerol kinase alpha	DGKA		31.7425	32.026	32.274	31.7695	31.8208	31.7617	31.9067	32.0602
P52824	Diacylglycerol kinase theta	DGKQ		25.8566	27.1532	26.2291	26.9557	26.7154	27.2297	25.9513	26.8326
Q13574;Q13574-6;Q13574-2;Q13574-4;Q13574-7;Q13574-5;Q13574-3	Diacylglycerol kinase zeta	DGKZ		27.8806	27.4477	28.2732	27.3652	28.1718	28.0636	28.0743	27.588
Q16854;Q16854-2;Q16854-3;Q16854-5;Q16854-4	Deoxyguanosine kinase, mitochondrial	DGUOK		29.0224	28.1975	28.2092	28.1213	27.7004	28.1229	29.0339	28.0588
Q15392;Q15392-2	Delta(24)-sterol reductase	DHCR24		32.194	32.6911	31.8262	32.1478	32.2711	32.6435	30.779	31.1667
Q9UBM7	7-dehydrocholesterol reductase	DHCR7		29.1794	29.3719	29.0747	29.0938	29.8033	29.9027	30.4082	30.3339
Q86SQ9;Q86SQ9-3;Q86SQ9-2;Q86SQ9-4	Dehydrodolichyl diphosphate syntase complex subunit DHDDS	DHDDS		25.7896	26.2376	26.9331	26.3806	NaN	26.1154	26.381	26.6694
P00374;P00374-2	Dihydrofolate reductase	DHFR		29.093	28.6142	28.8953	28.1291	28.336	27.7853	27.6209	27.9666
Q02127	Dihydroorotate dehydrogenase (quinone), mitochondrial	DHODH		27.6587	27.3704	27.3535	26.632	26.9884	26.4966	27.6559	27.456
P49366;P49366-2;P49366-3	Deoxyhypusine synthase	DHPS		26.8802	27.4461	26.7767	27.2931	27.5231	27.4538	27.8355	27.8137
Q96LJ7	Dehydrogenase/reductase SDR family member 1	DHRS1		28.9755	29.4813	28.2422	29.3983	28.6404	29.4636	27.623	28.2249
Q6UX07;Q6UX07-3;Q6UX07-2	Dehydrogenase/reductase SDR family member 13	DHRS13		25.5592	24.5751	24.9993	NaN	24.699	NaN	24.2553	NaN
O75911	Short-chain dehydrogenase/reductase 3	DHRS3		27.4064	27.8759	28.1584	29.4424	28.1969	28.5953	29.5847	30.1806
Q9BTZ2;Q9BTZ2-8;Q9BTZ2-4;Q9BTZ2-5	Dehydrogenase/reductase SDR family member 4	DHRS4		30.9002	31.4995	30.2821	31.7692	30.0774	30.6631	29.8907	30.6259
Q9Y394;Q9Y394-2	Dehydrogenase/reductase SDR family member 7	DHRS7		32.7518	32.3579	33.2149	32.9391	33.6809	32.902	32.9204	32.2565
Q6IAN0	Dehydrogenase/reductase SDR family member 7B	DHRS7B		30.3558	30.0358	30.4759	30.5284	29.9375	29.664	30.7425	30.5916
Q8N5I4	Dehydrogenase/reductase SDR family member on chromosome X	DHRSX		29.2007	28.8815	27.9947	28.783	29.0204	28.6341	27.8213	29.0905
Q96HY7	Probable 2-oxoglutarate dehydrogenase E1 component DHKTD1, mitochondrial	DHTKD1		28.5952	28.0364	28.9473	27.548	28.0766	28.2772	27.626	28.3308
O43143	Pre-mRNA-splicing factor ATP-dependent RNA helicase DHX15	DHX15		33.1665	33.1909	33.3845	33.2579	33.1117	33.2104	33.3024	33.1663
O60231	Putative pre-mRNA-splicing factor ATP-dependent RNA helicase DHX16	DHX16		29.4059	30.2324	30.0572	30.103	29.7646	29.907	30.2235	30.5907
Q7Z478	ATP-dependent RNA helicase DHX29	DHX29		32.0309	32.3465	31.9675	31.9389	31.7285	31.9963	31.8064	31.9267
Q7L2E3;Q7L2E3-2;Q7L2E3-3	Putative ATP-dependent RNA helicase DHX30	DHX30		30.3922	30.2527	30.6958	30.2352	30.6058	30.1503	30.17	30.2933
Q7L7V1;Q7L7V1-2	Putative pre-mRNA-splicing factor ATP-dependent RNA helicase DHX32	DHX32		27.3549	26.8675	27.4531	27.2561	28.6171	26.0819	27.7857	27.4068
Q9H6R0;Q9H6R0-2	Putative ATP-dependent RNA helicase DHX33	DHX33		25.3725	25.0493	25.9472	24.8558	25.9326	24.8099	25.6783	24.8932
Q9H2U1;Q9H2U1-2;Q9H2U1-3	ATP-dependent RNA helicase DHX36	DHX36		30.6129	30.8624	30.6395	31.0319	30.7962	30.4647	30.6427	30.8988
Q8IY37	Probable ATP-dependent RNA helicase DHX37	DHX37		29.1626	27.1973	29.0679	27.6103	28.2359	27.1732	28.9064	27.1724
Q92620	Pre-mRNA-splicing factor ATP-dependent RNA helicase PRP16	DHX38		30.2422	29.716	30.2792	29.7595	30.2596	30.1035	30.2679	29.8884
Q8IX18;Q8IX18-3;Q8IX18-4;Q8IX18-2	Probable ATP-dependent RNA helicase DHX40	DHX40		26.2144	26.8459	27.5343	27.0587	27.3533	27.2303	27.2052	27.0084
Q6P158	Putative ATP-dependent RNA helicase DHX57	DHX57		29.8036	29.1372	30.0304	29.8731	29.6241	29.5295	29.7973	29.1348
Q14562	ATP-dependent RNA helicase DHX8	DHX8		28.9737	28.4554	29.4574	28.3245	29.9385	28.6506	29.2115	28.5859
Q08211	ATP-dependent RNA helicase A	DHX9		34.4356	34.4044	34.5693	34.5921	34.3704	34.6333	34.5883	34.4059
Q9NR28;Q9NR28-2;Q9NR28-3	Diablo homolog, mitochondrial	DIABLO		30.8615	31.9287	31.065	31.9977	30.7213	31.9039	30.8005	30.7625
O60610;O60610-2;O60610-3	Protein diaphanous homolog 1	DIAPH1		32.6645	32.578	32.9277	32.7988	33.1667	32.8382	32.9307	32.5403
O60879-2;O60879;O60879-3	Protein diaphanous homolog 2	DIAPH2		32.0053	31.7106	31.8189	31.5926	31.8273	31.4441	31.2459	31.2592
Q9NSV4;Q9NSV4-4;Q9NSV4-5;Q9NSV4-7;Q9NSV4-6;Q9NSV4-1;Q9NSV4-2	Protein diaphanous homolog 3	DIAPH3		28.0871	27.3971	29.6619	28.1225	28.8543	28.2047	30.298	28.9183
Q9UPY3;Q9UPY3-2	Endoribonuclease Dicer	DICER1		29.0962	28.8423	29.5785	28.9896	29.7497	29.2556	29.8702	29.3806
Q9BTC0;Q9BTC0-1	Death-inducer obliterator 1	DIDO1		29.7143	29.9113	30.0764	30.019	29.7172	29.9647	30.0942	30.0418
Q68CQ4	Digestive organ expansion factor homolog	DIEXF		28.1326	27.9004	28.6836	28.0222	28.5479	28.0053	28.9077	27.8232
Q9UNQ2	Probable dimethyladenosine transferase	DIMT1		30.0293	30.0948	30.5848	30.1069	29.9461	29.7573	30.4573	29.9593
Q14689;Q14689-6;Q14689-5;Q14689-4;Q14689-2;Q14689-3	Disco-interacting protein 2 homolog A	DIP2A		30.3018	30.0827	29.8907	30.0746	30.0916	29.4689	29.7207	29.4905
Q9P265	Disco-interacting protein 2 homolog B	DIP2B		30.5313	30.2973	30.9386	30.6528	30.5788	30.3584	30.8305	30.6152
Q9Y2E4	Disco-interacting protein 2 homolog C	DIP2C		28.16	28.4003	27.2481	28.0644	27.9696	27.9367	28.2502	28.5433
O95057	GTP-binding protein Di-Ras1	DIRAS1		27.1737	25.7503	26.655	25.7833	26.7281	26.8527	25.4357	NaN
Q96SL1;Q96SL1-2	Disrupted in renal carcinoma protein 2	DIRC2		27.0044	27.2038	26.8202	26.5655	26.6659	27.0722	26.9376	26.9464
Q9Y2L1;Q9Y2L1-2	Exosome complex exonuclease RRP44	DIS3		31.7775	31.1908	31.8033	31.4734	31.4328	31.2137	31.8151	31.5365
Q8IYB7;Q8IYB7-2;Q8IYB7-3	DIS3-like exonuclease 2	DIS3L2		29.6043	29.4699	30.0706	29.7568	30.1816	29.824	30.2341	29.7141
O60832;O60832-2	H/ACA ribonucleoprotein complex subunit 4	DKC1		31.8328	32.2155	31.4696	32.0771	31.7888	32.1269	31.829	32.1692
Q9UBP4	Dickkopf-related protein 3	DKK3		27.3444	23.8679	29.7246	27.5026	30.3856	29.6805	29.0817	27.5688
P10515	Dihydrolipoyllysine-residue acetyltransferase component of pyruvate dehydrogenase complex, mitochondrial	DLAT		32.7626	32.1022	32.2952	32.0231	32.4658	32.3071	32.6919	32.771
Q96QB1;Q96QB1-6;Q96QB1-1;Q96QB1-4	Rho GTPase-activating protein 7	DLC1		28.5817	28.4634	28.9173	28.4177	28.4852	27.6649	28.6341	28.4914
P09622;P09622-2;P09622-3	Dihydrolipoyl dehydrogenase, mitochondrial	DLD		32.6348	33.1755	32.2157	33.0667	32.8259	32.8617	32.7873	32.9811
Q12959-2;Q12959-4;Q12959;Q12959-5;Q12959-3;Q12959-6;Q12959-7;Q12959-8;Q12959-9	Disks large homolog 1	DLG1		32.1636	31.5742	32.3021	32.1958	32.6301	32.075	32.1199	31.7336
Q8TDM6;Q8TDM6-4;Q8TDM6-2	Disks large homolog 5	DLG5		29.7184	28.7428	29.8659	29.2316	29.5227	29.0504	29.5244	28.4958
Q9Y2H0;Q9Y2H0-3;Q9Y2H0-1	Disks large-associated protein 4	DLGAP4		30.635	30.8221	30.2511	30.3193	30.1253	30.6977	30.4763	30.1901
Q15398;Q15398-3;Q15398-1	Disks large-associated protein 5	DLGAP5		24.7684	24.8046	27.9699	NaN	25.4769	25.1184	25.3635	24.7905
P36957;P36957-2	Dihydrolipoyllysine-residue succinyltransferase component of 2-oxoglutarate dehydrogenase complex, mitochondrial	DLST		34.1277	34.0394	33.9442	33.6397	34.0044	34.0554	33.74	34.3013
Q9NPF5	DNA methyltransferase 1-associated protein 1	DMAP1		28.5171	27.0754	28.7637	26.9238	28.3414	27.7693	28.6339	27.7615
P11532;P11532-4;P11532-3;P11532-2	Dystrophin	DMD		24.3089	NaN	25.6039	25.2531	26.8098	26.8491	30.2546	30.8095
P11532-5;P11532-8;P11532-7;P11532-6;P11532-10;P11532-9	Dystrophin	DMD		NaN	NaN	NaN	25.0524	25.2933	25.282	26.3375	26.1118
Q09013;Q09013-12;Q09013-10;Q09013-8;Q09013-5;Q09013-7;Q09013-11;Q09013-15;Q09013-16;Q09013-6;Q09013-1;Q09013-2	Myotonin-protein kinase	DMPK		30.014	28.5369	27.6084	28.0811	28.9631	NaN	28.5831	NaN
Q9Y485	DmX-like protein 1	DMXL1		28.9412	28.5559	29.1184	28.6104	28.9801	27.9916	29.4839	29.2029
Q8TDJ6;Q8TDJ6-3;Q8TDJ6-2	DmX-like protein 2	DMXL2		28.0959	27.5726	28.2197	26.0345	28.0375	26.8436	27.1874	25.5048
Q86Y56;Q86Y56-2	Dynein assembly factor 5, axonemal	DNAAF5		30.565	30.4511	30.2094	30.4682	30.1887	30.5206	29.5587	29.5382
P31689;P31689-2	DnaJ homolog subfamily A member 1	DNAJA1		32.978	32.6035	33.3107	32.5708	33.0779	32.8105	32.7029	32.6875
O60884	DnaJ homolog subfamily A member 2	DNAJA2		32.7375	32.7845	33.0225	32.82	32.9063	33.0412	32.9671	32.6617
Q96EY1;Q96EY1-2	DnaJ homolog subfamily A member 3, mitochondrial	DNAJA3		30.2794	30.2671	30.4928	30.2132	30.0729	29.6973	30.1145	29.9596
Q8WW22;Q8WW22-2;Q8WW22-3	DnaJ homolog subfamily A member 4	DNAJA4		26.7758	28.6623	28.6995	28.7756	28.2764	28.9062	28.7693	NaN
P25685;P25685-2	DnaJ homolog subfamily B member 1	DNAJB1		32.5935	32.3551	32.5042	32.4993	32.291	32.3677	32.2367	32.2831
Q9UBS4	DnaJ homolog subfamily B member 11	DNAJB11		32.2139	32.8713	32.6285	32.9309	32.5522	33.1931	32.9738	33.0423
Q9NXW2;Q9NXW2-2	DnaJ homolog subfamily B member 12	DNAJB12		30.335	29.7947	30.8662	29.9076	30.8367	30.3058	30.8169	30.0181
Q8TBM8;Q8TBM8-2	DnaJ homolog subfamily B member 14	DNAJB14		26.2928	27.5414	27.4904	27.2982	27.5168	27.5079	27.6398	27.684
P25686;P25686-2	DnaJ homolog subfamily B member 2	DNAJB2		29.3944	29.443	29.322	29.6123	29.8899	29.5457	29.0256	29.3634
Q9UDY4	DnaJ homolog subfamily B member 4	DNAJB4		31.4437	31.5373	31.135	30.5523	31.2083	31.1913	31.125	30.9137
O75953-4;O75953-5;O75953	DnaJ homolog subfamily B member 5	DNAJB5		26.1181	NaN	26.7567	24.9686	26.4879	25.5476	27.1338	25.9155
O75190;O75190-3;O75190-2;O75190-4	DnaJ homolog subfamily B member 6	DNAJB6		29.3404	29.6601	29.8975	29.8016	30.5028	29.6377	31.4513	30.0957
Q96KC8	DnaJ homolog subfamily C member 1	DNAJC1		28.567	29.0886	29.5777	30.2632	29.5605	30.2577	29.3467	29.8277
Q8IXB1;Q8IXB1-2	DnaJ homolog subfamily C member 10	DNAJC10		31.1261	31.3343	30.7936	30.7784	30.9573	31.0015	30.9244	30.8775
Q9NVH1;Q9NVH1-3;Q9NVH1-2	DnaJ homolog subfamily C member 11	DNAJC11		30.5987	30.6961	30.3416	30.6128	30.5385	30.5298	30.7443	30.4099
O75165	DnaJ homolog subfamily C member 13	DNAJC13		33.8451	33.5344	33.6221	33.4933	33.5727	33.1949	33.4405	33.2905
Q6Y2X3	DnaJ homolog subfamily C member 14	DNAJC14		25.2539	25.332	25.2809	25.6289	25.2646	25.8019	25.697	26.016
Q9Y2G8;Q9Y2G8-2	DnaJ homolog subfamily C member 16	DNAJC16		28.5287	26.109	28.6969	26.7523	28.5068	25.9369	28.4904	26.8586
Q9NVM6	DnaJ homolog subfamily C member 17	DNAJC17		26.5763	26.7808	26.7009	27.2489	26.7004	27.2828	27.2138	26.8535
Q96DA6;Q96DA6-2	Mitochondrial import inner membrane translocase subunit TIM14	DNAJC19		27.7063	29.156	26.2366	29.0107	NaN	29.2227	28.1023	29.2692
Q99543;Q99543-2	DnaJ homolog subfamily C member 2;DnaJ homolog subfamily C member 2, N-terminally processed	DNAJC2		29.9061	29.708	30.0589	29.8386	29.984	29.7242	30.0647	29.9962
Q5F1R6;Q5F1R6-3;Q5F1R6-2	DnaJ homolog subfamily C member 21	DNAJC21		29.3104	29.1962	29.5758	28.6564	29.5326	28.8664	29.4821	29.0072
Q9H1X3;Q9H1X3-2	DnaJ homolog subfamily C member 25	DNAJC25		28.6528	27.8417	28.4993	27.7033	28.4904	27.7588	28.3689	27.2921
Q9H1X3-3	DnaJ homolog subfamily C member 25	DNAJC25		25.6222	24.9441	25.2525	25.3525	26.1969	26.6146	26.5159	26.9064
Q13217	DnaJ homolog subfamily C member 3	DNAJC3		32.3336	32.3898	32.3244	32.3542	32.7783	32.2312	32.9389	32.7039
Q96LL9	DnaJ homolog subfamily C member 30	DNAJC30		25.7795	25.5024	26.021	25.4093	25.2983	25.6382	NaN	25.5246
Q9H3Z4;Q9H3Z4-2	DnaJ homolog subfamily C member 5	DNAJC5		30.9093	30.5378	30.5263	30.4713	30.6735	30.7811	30.6088	30.47
O75061;O75061-4;O75061-2	Putative tyrosine-protein phosphatase auxilin	DNAJC6		26.2424	26.027	27.9303	27.1472	29.2615	28.8904	28.8341	27.5082
Q99615;Q99615-2	DnaJ homolog subfamily C member 7	DNAJC7		31.5048	31.551	31.9379	31.8841	31.6446	31.503	31.7839	31.5814
O75937	DnaJ homolog subfamily C member 8	DNAJC8		31.6296	30.7402	31.5319	31.1993	31.5222	30.8387	31.3222	30.2802
Q8WXX5	DnaJ homolog subfamily C member 9	DNAJC9		30.1454	29.9114	30.5327	29.8236	30.3968	29.6184	29.9434	29.6869
Q4LDG9;Q4LDG9-2;Q4LDG9-3	Dynein light chain 1, axonemal	DNAL1		24.0127	24.0459	24.3566	24.0799	24.3081	24.4754	NaN	24.5542
P49184	Deoxyribonuclease-1-like 1	DNASE1L1		27.7251	27.0106	28.3993	27.4921	28.7663	27.8891	23.4749	NaN
O00115;O00115-2	Deoxyribonuclease-2-alpha	DNASE2	1	31.5643	30.7539	31.6711	30.9429	31.6227	31.3878	32.0003	31.1071
Q5SXM8	DNL-type zinc finger protein	DNLZ		27.5754	26.5512	27.5008	25.9294	25.7074	25.4893	25.8484	26.0275
Q05193;Q05193-3	Dynamin-1	DNM1		32.3809	31.8535	31.6456	30.8215	32.0079	31.1192	28.4906	25.1166
O00429-2;O00429-4;O00429-8	Dynamin-1-like protein	DNM1L		33.0814	33.05	32.9167	32.8497	33.2134	33.1645	33.2356	33.146
O00429;O00429-3;O00429-6;O00429-5;O00429-7	Dynamin-1-like protein	DNM1L		26.3626	26.1657	26.5197	25.5912	25.4396	25.8262	26.5367	26.2413
P50570;P50570-5	Dynamin-2	DNM2		33.8956	33.482	33.7257	33.3964	33.7054	33.765	33.2927	33.4444
Q9UQ16;Q9UQ16-3;Q9UQ16-4;Q9UQ16-2;Q9UQ16-5	Dynamin-3	DNM3		26.674	25.0703	25.5928	23.3465	24.1739	25.4637	NaN	21.976
Q6XZF7	Dynamin-binding protein	DNMBP		31.6469	31.5803	31.6942	31.1991	31.3446	31.3565	30.501	30.6326
P26358;P26358-2;P26358-3	DNA (cytosine-5)-methyltransferase 1	DNMT1		30.464	30.4144	31.5901	30.3614	30.7742	30.2996	30.7572	29.9955
Q9ULA0	Aspartyl aminopeptidase	DNPEP		31.7371	31.8492	31.2958	31.5087	31.5863	31.645	31.4133	31.475
O43598;O43598-2	2-deoxynucleoside 5-phosphate N-hydrolase 1	DNPH1		29.6043	30.3788	29.4689	29.9273	29.6495	30.5761	29.012	29.3494
Q9H147	Deoxynucleotidyltransferase terminal-interacting protein 1	DNTTIP1		26.482	26.8306	26.7732	26.792	27.0066	27.1171	26.2723	25.8247
Q5QJE6	Deoxynucleotidyltransferase terminal-interacting protein 2	DNTTIP2		29.0113	29.2729	29.5377	28.938	29.2116	29.2002	29.2365	29.3395
Q14185	Dedicator of cytokinesis protein 1	DOCK1		32.024	31.4619	31.9885	31.5081	31.9774	31.6264	31.7364	31.0817
Q96BY6;Q96BY6-3	Dedicator of cytokinesis protein 10	DOCK10		29.2635	29.3036	30.9781	30.5503	30.6117	30.3916	30.3914	30.1688
Q5JSL3	Dedicator of cytokinesis protein 11	DOCK11		31.0105	30.2821	30.7264	30.1771	30.7583	30.2015	31.5052	31.3241
Q92608	Dedicator of cytokinesis protein 2	DOCK2		26.7651	24.6852	26.9798	26.3044	27.1114	25.7704	28.9478	26.0966
Q9H7D0	Dedicator of cytokinesis protein 5	DOCK5		31.7205	31.6403	31.9911	31.7044	31.7169	31.8571	31.8037	31.6904
Q96HP0	Dedicator of cytokinesis protein 6	DOCK6		28.048	28.5283	28.6527	30.9232	28.5674	29.0445	28.4367	29.2735
Q96N67-2;Q96N67-4	Dedicator of cytokinesis protein 7	DOCK7		32.656	32.7595	32.8181	32.384	32.8869	32.7422	32.7034	32.854
Q9BZ29-4;Q9BZ29;Q9BZ29-3;Q9BZ29-5	Dedicator of cytokinesis protein 9	DOCK9		28.2571	27.1089	28.7346	27.1026	29.2304	28.2384	29.6239	28.1499
Q9BU89	Deoxyhypusine hydroxylase	DOHH		30.0942	29.482	29.8159	29.891	30.0276	30.2602	29.6447	30.0145
Q99704;Q99704-3	Docking protein 1	DOK1		29.3404	28.7172	29.6857	28.9864	29.7667	29.5765	29.9203	29.246
Q9Y3R5;Q9Y3R5-2	Protein dopey-2	DOPEY2		28.3026	26.8514	28.4594	26.9399	29.1834	27.9888	28.4663	26.8394
Q8N350;Q8N350-4	Protein Dos	DOS		25.9294	25.7029	26.1061	25.6468	25.3064	26.1201	26.5687	25.851
Q9BVM2	Protein DPCD	DPCD		26.0289	27.8801	26.6935	27.731	26.6328	27.8474	25.8331	27.4863
Q92785;Q92785-2	Zinc finger protein ubi-d4	DPF2		28.4678	28.6658	28.4105	29.1034	28.773	29.177	28.5404	28.8705
Q92784;Q92784-2;Q92784-4;Q92784-5;Q92784-3	Zinc finger protein DPF3	DPF3		25.018	26.1162	26.0396	26.4782	24.5754	24.4035	NaN	NaN
Q9BZG8;Q9BZG8-3;Q9BZG8-2	Diphthamide biosynthesis protein 1	DPH1		24.1257	24.9955	25.3931	26.3986	NaN	24.8194	NaN	24.7732
Q9BQC3;Q9BQC3-2;Q9BQC3-3	Diphthamide biosynthesis protein 2	DPH2		26.8635	NaN	27.0128	NaN	27.1132	27.2629	26.8706	26.2733
Q96FX2;Q96FX2-2	DPH3 homolog	DPH3		NaN	26.32	25.0038	25.7393	25.3862	27.031	25.5772	25.9761
Q9H2P9;Q9H2P9-3;Q9H2P9-2;Q9H2P9-4;Q9H2P9-5;Q9H2P9-6	Diphthine synthase	DPH5		28.6552	28.2348	29.0903	28.6878	29.1946	28.6575	28.9693	27.7964
Q7L8W6	Diphthine--ammonia ligase	DPH6		26.6116	23.9933	27.2432	25.4378	26.51	24.7002	26.3159	24.8306
O60762	Dolichol-phosphate mannosyltransferase subunit 1	DPM1		31.8571	31.8274	31.6586	31.4805	31.5657	31.4506	30.5647	31.5669
Q9P2X0-2;Q9P2X0	Dolichol-phosphate mannosyltransferase subunit 3	DPM3		29.7439	30.5094	30.0762	30.3993	30.3814	30.8228	30.246	30.6324
Q9NY33;Q9NY33-4	Dipeptidyl peptidase 3	DPP3		33.093	32.8788	33.3089	33.3987	33.2375	33.3574	32.907	32.7185
P27487	Dipeptidyl peptidase 4;Dipeptidyl peptidase 4 membrane form;Dipeptidyl peptidase 4 soluble form	DPP4		35.265	34.5878	34.3278	34.3548	34.5898	33.5181	31.7196	30.8533
Q9UHL4	Dipeptidyl peptidase 2	DPP7	1	29.9684	30.0381	31.1804	31.7716	31.5988	31.6907	31.2065	31.1751
Q6V1X1;Q6V1X1-5;Q6V1X1-3;Q6V1X1-4;Q6V1X1-2;Q6V1X1-6	Dipeptidyl peptidase 8	DPP8		29.3551	28.7466	29.4789	28.7689	29.2389	28.3714	29.4423	28.1831
Q86TI2;Q86TI2-2;Q86TI2-4	Dipeptidyl peptidase 9	DPP9		31.5838	32.0037	31.783	32.1353	31.6681	32.1805	30.9132	31.7935
Q07507	Dermatopontin	DPT		26.9355	NaN	26.2238	26.5693	27.0067	24.5531	26.137	24.7629
Q2PZI1	Probable C-mannosyltransferase DPY19L1	DPY19L1		29.2963	29.0562	28.7355	28.4094	29.0881	28.7336	29.0784	28.8043
Q7Z388	Probable C-mannosyltransferase DPY19L4	DPY19L4		27.8601	26.7285	27.5996	26.7754	26.7806	26.5487	27.146	25.8364
Q9C005	Protein dpy-30 homolog	DPY30		29.0119	29.3799	29.3403	29.8143	29.1435	29.3362	28.8034	29.3523
Q12882	Dihydropyrimidine dehydrogenase [NADP(+)]	DPYD		31.9652	31.2596	31.9237	30.9999	31.4915	30.7906	29.381	25.3278
Q16555;Q16555-2	Dihydropyrimidinase-related protein 2	DPYSL2		36.7254	37.0035	35.9915	36.4278	36.3381	36.2587	35.8165	35.9601
Q14195-2;Q14195	Dihydropyrimidinase-related protein 3	DPYSL3		35.8673	35.5467	35.4473	35.38	35.6645	35.3113	34.9936	35.4317
O14531	Dihydropyrimidinase-related protein 4	DPYSL4		24.6004	28.5242	28.5462	28.9672	27.8475	28.1816	29.1409	28.9516
Q01658	Protein Dr1	DR1		29.0565	29.4385	29.5629	28.782	29.5376	28.9439	29.673	29.3775
Q8N682;Q8N682-2	DNA damage-regulated autophagy modulator protein 1	DRAM1		26.6853	25.921	26.021	25.3006	26.4857	25.7253	25.8274	25.6321
Q6UX65	DNA damage-regulated autophagy modulator protein 2	DRAM2		28.5667	28.9491	27.6733	29.1008	28.2261	29.248	27.9816	28.9234
Q14919;Q14919-2	Dr1-associated corepressor	DRAP1		28.7053	29.2252	29.2568	29.5043	28.75	29.6342	28.9954	30.0648
Q9Y295	Developmentally-regulated GTP-binding protein 1	DRG1		32.1814	31.4583	32.2626	31.8943	31.901	31.8294	32.1944	31.5142
P55039	Developmentally-regulated GTP-binding protein 2	DRG2		31.6444	32.4395	31.4762	32.1398	31.1102	31.74	31.2104	32.3008
Q02487-2;Q02487	Desmocollin-2	DSC2		24.1896	27.2275	25.1928	27.8593	24.9972	27.9015	25.6235	27.9234
O14972;O14972-2	Down syndrome critical region protein 3	DSCR3		31.9433	31.6991	31.7224	31.3674	32.1575	31.4131	32.0059	30.9826
Q9UL01	Dermatan-sulfate epimerase	DSE		27.221	27.4009	28.2943	28.3748	27.8586	28.2534	29.4253	29.8182
Q8IZU8	Dermatan-sulfate epimerase-like protein	DSEL		28.0841	28.6253	27.8593	28.0649	28.089	28.4081	25.9964	26.1879
Q9H410;Q9H410-4;Q9H410-2;Q9H410-3	Kinetochore-associated protein DSN1 homolog	DSN1		25.5049	25.6396	25.9313	25.1692	25.1191	25.2836	25.1658	25.3062
P15924;P15924-3;P15924-2	Desmoplakin	DSP		33.9946	33.7299	34.8908	34.3255	34.0064	33.8664	34.6448	34.7323
Q03001	Dystonin	DST		35.0201	34.8687	35.2365	34.8684	35.1213	34.9893	34.5542	34.1974
Q03001-11	Dystonin	DST		27.7188	28.6285	27.8057	27.8948	27.7771	29.1085	26.6566	26.5252
P60981;P60981-2	Destrin	DSTN		34.1665	35.6039	35.0364	35.4517	34.4151	35.5899	35.3519	36.1683
Q6XUX3;Q6XUX3-2;Q6XUX3-3	Dual serine/threonine and tyrosine protein kinase	DSTYK		27.5765	27.9287	27.4647	27.5031	26.6914	27.8307	26.5242	27.673
Q8TEA8	D-tyrosyl-tRNA(Tyr) deacylase 1	DTD1		29.5848	30.8741	28.9153	30.4186	29.9396	30.8155	29.3019	30.859
Q96FN9	Probable D-tyrosyl-tRNA(Tyr) deacylase 2	DTD2		26.3912	27.1142	26.8383	27.3323	26.4841	26.4507	25.5516	25.5528
Q9Y4J8;Q9Y4J8-14;Q9Y4J8-13;Q9Y4J8-2;Q9Y4J8-15;Q9Y4J8-6;Q9Y4J8-10;Q9Y4J8-11;Q9Y4J8-16;Q9Y4J8-5;Q9Y4J8-4;Q9Y4J8-3;Q9Y4J8-8;Q9Y4J8-12	Dystrobrevin alpha	DTNA		26.5861	26.6196	24.7897	25.9495	25.5463	26.2505	25.7658	26.2841
Q96EV8;Q96EV8-2;Q96EV8-3	Dysbindin	DTNBP1		28.4897	28.8622	28.2507	29.0133	28.4166	29.0453	27.7309	28.8799
Q8N5C7;Q8N5C7-2	DTW domain-containing protein 1	DTWD1		28.8931	28.7636	28.1194	27.1985	28.5813	27.4472	27.4158	27.5836
Q8TDB6	E3 ubiquitin-protein ligase DTX3L	DTX3L		30.3554	29.7499	31.0289	30.9844	31.1715	30.6216	30.8299	30.2906
Q9Y2E6;Q9Y2E6-2	E3 ubiquitin-protein ligase DTX4	DTX4		29.6435	28.9809	29.6118	29.5326	29.2712	29.9777	29.4021	29.0444
P23919;P23919-2	Thymidylate kinase	DTYMK		31.8142	31.401	31.7072	31.715	31.8496	31.6431	31.5498	30.7394
Q6P1R4	tRNA-dihydrouridine(16/17) synthase [NAD(P)(+)]-like	DUS1L		24.2845	22.9056	24.7943	23.3416	25.7372	23.4908	24.9107	23.9934
Q9NX74	tRNA-dihydrouridine(20) synthase [NAD(P)+]-like	DUS2		26.0477	27.118	26.3125	26.8048	26.0807	26.704	26.3187	26.4556
Q96G46;Q96G46-2	tRNA-dihydrouridine(47) synthase [NAD(P)(+)]-like	DUS3L		27.1449	27.0886	27.4629	27.4177	27.0198	25.5046	27.5438	26.8517
O75319;O75319-2	RNA/RNP complex-1-interacting phosphatase	DUSP11		26.8162	25.6482	27.1042	26.2069	27.636	26.3819	27.7642	26.4355
Q9UNI6	Dual specificity protein phosphatase 12	DUSP12		29.6064	28.5156	29.6416	28.4477	29.3315	28.2492	29.2898	28.6144
O95147	Dual specificity protein phosphatase 14	DUSP14		28.5577	28.1572	28.3745	27.9459	29.0646	28.6148	29.1553	28.4792
Q9NRW4;Q9NRW4-2	Dual specificity protein phosphatase 22	DUSP22		24.8612	24.8517	25.4631	25.0192	24.8997	24.5321	25.3467	24.4431
Q9BVJ7	Dual specificity protein phosphatase 23	DUSP23		27.5641	27.8107	28.4581	28.0888	27.5248	27.094	27.1997	27.6861
P51452;P51452-2	Dual specificity protein phosphatase 3	DUSP3		30.658	31.7033	30.7821	31.1885	30.7731	31.4598	30.836	31.6373
P33316-2	Deoxyuridine 5-triphosphate nucleotidohydrolase, mitochondrial	DUT		30.8935	31.3529	31.2177	31.4664	30.5341	31.0694	30.807	31.3278
P33316	Deoxyuridine 5-triphosphate nucleotidohydrolase, mitochondrial	DUT		27.9467	28.0209	27.5937	28.2181	28.3255	28.1148	28.2014	27.8047
O14640-2;O14640	Segment polarity protein dishevelled homolog DVL-1	DVL1		27.1992	26.7662	27.3893	26.5805	27.5349	27.1113	27.0189	26.3019
O14641	Segment polarity protein dishevelled homolog DVL-2	DVL2		30.5254	30.4237	30.5718	30.4629	30.611	30.8446	30.4753	30.5023
Q92997;Q92997-2	Segment polarity protein dishevelled homolog DVL-3	DVL3		27.9575	27.1588	28.3098	28.0812	28.1981	27.4309	29.0562	27.9182
O77932	Decapping and exoribonuclease protein	DXO		NaN	NaN	24.2593	24.1844	24.5703	24.7724	24.4054	24.383
Q7RTS9;Q7RTS9-2	Dymeclin	DYM		27.835	28.6776	28.1703	28.265	NaN	28.2116	NaN	27.3698
Q14204	Cytoplasmic dynein 1 heavy chain 1	DYNC1H1		37.5696	37.4397	37.3697	37.5079	37.5321	37.608	37.2904	37.3938
O14576;O14576-2;O14576-3;O14576-5;O14576-4	Cytoplasmic dynein 1 intermediate chain 1	DYNC1I1		25.7693	24.5173	25.3821	24.4859	26.0597	26.0796	24.8856	25.3134
Q13409-3;Q13409-2;Q13409-6;Q13409;Q13409-7;Q13409-5	Cytoplasmic dynein 1 intermediate chain 2	DYNC1I2		33.8206	33.7862	33.7432	33.7594	33.8236	33.7692	33.8673	33.571
Q9Y6G9	Cytoplasmic dynein 1 light intermediate chain 1	DYNC1LI1		33.1375	32.8587	33.0576	32.6975	33.1323	33.1481	32.846	32.9299
O43237;O43237-2	Cytoplasmic dynein 1 light intermediate chain 2	DYNC1LI2		33.1922	32.9689	32.9911	32.8781	33.1058	33.0113	33.2258	32.9836
Q8NCM8;Q8NCM8-2	Cytoplasmic dynein 2 heavy chain 1	DYNC2H1		29.7728	29.079	29.297	29.0888	28.9018	29.4413	29.4278	28.0274
Q8TCX1-2	Cytoplasmic dynein 2 light intermediate chain 1	DYNC2LI1		26.9641	25.7763	25.9431	26.2825	25.5557	25.4835	26.538	NaN
P63167	Dynein light chain 1, cytoplasmic	DYNLL1		31.7613	31.7773	32.0684	31.4676	31.1054	31.6824	31.2916	31.5199
Q96FJ2	Dynein light chain 2, cytoplasmic	DYNLL2		33.1697	32.8458	33.5434	33.2504	33.1797	33.4606	32.8316	32.7915
Q9NP97	Dynein light chain roadblock-type 1	DYNLRB1		32.3969	32.8015	32.0895	32.5991	32.0203	33.2219	32.2428	32.6278
P63172	Dynein light chain Tctex-type 1	DYNLT1		30.5561	30.132	30.1699	31.0509	30.5507	31.1985	30.2283	30.7124
P51808	Dynein light chain Tctex-type 3	DYNLT3		31.5565	31.3004	31.2949	31.6614	31.6182	32.8301	31.477	31.9722
Q13627;Q13627-4;Q13627-2;Q13627-3;Q13627-5	Dual specificity tyrosine-phosphorylation-regulated kinase 1A	DYRK1A		28.1088	28.2709	28.3596	28.3145	27.7423	28.341	28.0946	28.4596
Q16254	Transcription factor E2F4	E2F4		28.0166	27.0969	28.566	27.0756	28.1754	27.4279	28.11	27.024
Q66K89	Transcription factor E4F1	E4F1		25.5443	25.7415	25.5008	24.7691	25.7527	25.9043	25.5864	25.9527
Q96JC9	ELL-associated factor 1	EAF1		25.5466	25.7122	26.3652	26.4111	26.2647	NaN	26.1571	NaN
Q56P03	E2F-associated phosphoprotein	EAPP		26.0634	NaN	26.4529	26.3425	26.2752	25.6982	26.214	25.8985
Q5JPH6;Q5JPH6-2	Probable glutamate--tRNA ligase, mitochondrial	EARS2		28.0577	26.8012	28.2971	27.2449	26.4774	26.3535	27.1704	27.2736
Q9UH73	Transcription factor COE1	EBF1		29.1178	26.9807	27.8701	26.9357	27.9248	25.7076	27.2767	27.187
Q9HAK2	Transcription factor COE2	EBF2		31.7351	31.2371	31.8152	30.1673	31.574	30.1499	31.3053	28.4605
Q9H4W6-2;Q9H4W6	Transcription factor COE3	EBF3		25.7484	25.6627	24.2998	NaN	24.6583	23.098	NaN	NaN
Q99848	Probable rRNA-processing protein EBP2	EBNA1BP2		30.6915	30.5997	30.995	30.6114	30.8004	30.1813	30.7012	30.8796
Q15125	3-beta-hydroxysteroid-Delta(8),Delta(7)-isomerase	EBP		29.7852	30.8364	30.5092	31.1388	29.9898	31.0356	30.1988	31.0139
P42892;P42892-3;P42892-4;P42892-2	Endothelin-converting enzyme 1	ECE1		32.8164	32.7663	32.5036	32.437	31.8834	32.3378	31.2968	31.8743
Q13011	Delta(3,5)-Delta(2,4)-dienoyl-CoA isomerase, mitochondrial	ECH1		30.9548	32.2084	30.0609	31.5523	30.343	31.9595	29.9311	32.1739
Q9NTX5;Q9NTX5-2;Q9NTX5-6;Q9NTX5-3	Ethylmalonyl-CoA decarboxylase	ECHDC1		32.2293	31.4465	32.0813	31.467	32.0747	31.7421	32.2263	31.3113
Q96DC8	Enoyl-CoA hydratase domain-containing protein 3, mitochondrial	ECHDC3		24.4826	NaN	NaN	NaN	26.1646	25.3501	27.687	28.0164
P30084	Enoyl-CoA hydratase, mitochondrial	ECHS1		34.1256	33.7535	33.9862	33.225	34.0002	33.1927	33.8542	33.1889
P42126;P42126-2	Enoyl-CoA delta isomerase 1, mitochondrial	ECI1		31.18	31.0564	31.0541	31.4415	31.1866	30.7722	30.5335	29.7856
O75521;O75521-2	Enoyl-CoA delta isomerase 2, mitochondrial	ECI2		33.2782	33.0501	32.8502	32.4263	32.4382	32.5804	32.1793	32.2471
Q16610;Q16610-4	Extracellular matrix protein 1	ECM1		31.9278	32.1071	31.7291	31.6542	31.708	31.5743	31.5629	31.7763
Q5VYK3	Proteasome-associated protein ECM29 homolog	ECM29		32.6291	32.286	32.5892	32.6336	32.6604	32.488	32.7931	32.7558
Q9BQ95;Q9BQ95-2;Q9BQ95-4	Evolutionarily conserved signaling intermediate in Toll pathway, mitochondrial	ECSIT		27.6541	26.2407	28.666	27.6831	28.0603	28.0392	27.9861	27.5181
Q96F86	Enhancer of mRNA-decapping protein 3	EDC3		29.7423	29.4069	30.2731	29.7797	29.9054	29.8795	29.9439	29.8654
Q6P2E9;Q6P2E9-2	Enhancer of mRNA-decapping protein 4	EDC4		32.2114	32.1347	32.5996	32.4798	32.2198	32.4749	32.1746	32.4731
Q9BV94;Q9BV94-2	ER degradation-enhancing alpha-mannosidase-like protein 2	EDEM2		26.4173	25.4765	27.2688	NaN	26.5243	26.0508	26.0225	26.5652
Q9BZQ6;Q9BZQ6-2	ER degradation-enhancing alpha-mannosidase-like protein 3	EDEM3		28.7948	28.3421	28.5059	28.0484	29.0272	28.1294	28.7602	28.8515
O60869;O60869-2;O60869-3	Endothelial differentiation-related factor 1	EDF1		31.6186	32.0663	31.3763	32.3468	31.2095	32.6519	31.0106	32.3015
O43854;O43854-2	EGF-like repeat and discoidin I-like domain-containing protein 3	EDIL3		25.0719	23.8209	23.1868	25.1455	27.5919	28.8822	32.3633	33.3422
Q15075	Early endosome antigen 1	EEA1		35.955	36.1355	35.8326	35.939	35.8098	35.9462	35.5957	35.5315
O75530;O75530-2;O75530-3	Polycomb protein EED	EED		26.6581	25.5157	27.3008	25.7978	26.8283	26.3652	26.9568	26.3459
P68104;Q5VTE0;P68104-2	Elongation factor 1-alpha 1;Putative elongation factor 1-alpha-like 3	EEF1A1;EEF1A1P5		38.1494	38.3949	38.0912	38.4983	38.058	38.3932	38.2146	38.8158
P24534	Elongation factor 1-beta	EEF1B2		34.9997	34.9012	35.3276	34.7235	35.0557	34.8567	35.2001	35.491
P29692-2	Elongation factor 1-delta	EEF1D		35.8089	35.6191	35.9039	35.449	35.7222	35.4955	35.82	35.9741
P29692	Elongation factor 1-delta	EEF1D		32.984	31.4734	32.6749	32.4832	32.8672	32.1865	32.8122	33.0513
P29692-3	Elongation factor 1-delta	EEF1D		29.6586	28.4152	29.2575	29.0676	28.8363	28.7736	29.8861	29.3211
P29692-4	Elongation factor 1-delta	EEF1D		NaN	25.4624	26.1624	25.5789	NaN	26.0378	NaN	26.1237
O43324;O43324-2	Eukaryotic translation elongation factor 1 epsilon-1	EEF1E1		30.7325	31.6113	31.2062	31.6468	30.8378	31.2518	31.1554	32.0815
P26641;P26641-2	Elongation factor 1-gamma	EEF1G		35.3441	35.1115	35.1095	35.1382	35.0489	35.109	35.1705	35.3503
P13639	Elongation factor 2	EEF2		37.0263	37.206	37.1492	37.3345	37.1083	37.3867	37.1737	37.4145
O00418	Eukaryotic elongation factor 2 kinase	EEF2K		29.2919	29.3236	28.9302	28.9201	28.2893	28.6336	28.3864	28.1122
P57772;P57772-2	Selenocysteine-specific elongation factor	EEFSEC		30.1159	30.23	30.4313	30.5407	30.3736	30.3115	30.4725	30.3519
Q7L9B9	Endonuclease/exonuclease/phosphatase family domain-containing protein 1	EEPD1		27.4865	26.9075	27.8544	27.4133	27.5877	27.3201	27.3683	26.0379
O75071	EF-hand calcium-binding domain-containing protein 14	EFCAB14		27.8016	28.8334	27.1755	28.4937	27.2748	27.5191	25.7061	28.954
Q12805;Q12805-2;Q12805-4;Q12805-3;Q12805-5	EGF-containing fibulin-like extracellular matrix protein 1	EFEMP1		31.205	31.2527	29.5315	30.4333	27.3556	27.6384	29.8044	29.6508
O95967	EGF-containing fibulin-like extracellular matrix protein 2	EFEMP2		26.7648	27.2424	27.4322	26.7441	27.7326	27.4055	27.7682	27.9668
Q96C19	EF-hand domain-containing protein D2	EFHD2		32.6979	32.76	32.3	32.2973	32.4347	32.6724	32.3658	32.0914
P52803	Ephrin-A5	EFNA5		29.2042	28.0884	28.0018	27.8119	28.4856	27.7698	27.6576	28.5395
P98172	Ephrin-B1	EFNB1		28.4604	27.2891	27.7455	27.0219	28.0711	27.4382	27.8676	27.2794
P52799	Ephrin-B2	EFNB2		24.1419	24.3643	25.6873	26.8054	27.7281	28.6378	29.2216	29.4845
Q14156;Q14156-3;Q14156-2	Protein EFR3 homolog A	EFR3A		30.8218	30.1284	30.5194	30.1358	30.8707	30.0274	30.7572	30.2929
O43281;O43281-3;O43281-2	Embryonal Fyn-associated substrate	EFS		27.2667	26.9312	28.1921	28.1465	28.2049	27.5098	26.775	27.7836
Q7Z2Z2;Q7Z2Z2-2	Elongation factor Tu GTP-binding domain-containing protein 1	EFTUD1		32.6168	32.1551	32.4015	32.0303	32.467	32.2093	32.2178	32.0639
Q15029;Q15029-2;Q15029-3	116 kDa U5 small nuclear ribonucleoprotein component	EFTUD2		33.2958	33.2213	33.3543	33.4176	33.217	33.1002	33.1505	33.6878
P00533;P00533-4;P00533-3	Epidermal growth factor receptor	EGFR		33.2171	33.5314	33.0605	32.9141	32.9264	32.7942	31.3726	31.6055
Q9GZT9;Q9GZT9-2;Q9GZT9-3	Egl nine homolog 1	EGLN1		28.432	28.8329	28.3945	28.5921	28.5641	28.7003	27.6958	28.3989
Q8NDI1;Q8NDI1-3;Q8NDI1-2	EH domain-binding protein 1	EHBP1		32.8509	32.7373	32.3228	32.4835	32.1727	32.1288	32.1095	32.1644
Q8N3D4	EH domain-binding protein 1-like protein 1	EHBP1L1		31.2785	31.1649	31.1424	31.1203	30.9254	31.0832	31.4365	31.5523
Q9H4M9	EH domain-containing protein 1	EHD1		34.868	35.2557	34.2747	34.5856	34.0409	34.5858	33.827	34.3433
Q9NZN4;Q9NZN4-2	EH domain-containing protein 2	EHD2		36.1348	36.3011	35.7423	36.0295	35.7404	36.0184	35.2195	35.8047
Q9NZN3	EH domain-containing protein 3	EHD3		32.1116	31.8838	32.1001	31.9029	31.7003	31.5124	30.1012	29.9137
Q9H223	EH domain-containing protein 4	EHD4		32.1404	31.8658	32.3274	31.9655	32.3827	32.503	31.7287	32.3859
Q08426;Q08426-2	Peroxisomal bifunctional enzyme;Enoyl-CoA hydratase/3,2-trans-enoyl-CoA isomerase;3-hydroxyacyl-CoA dehydrogenase	EHHADH		30.258	30.6127	30.4852	30.6025	30.3585	30.2405	30.7895	30.9615
Q9H9B1;Q9H9B1-3;Q9H9B1-4	Histone-lysine N-methyltransferase EHMT1	EHMT1		28.1218	29.4128	27.9778	29.3755	27.8638	28.0472	27.8151	28.8598
Q96KQ7;Q96KQ7-2	Histone-lysine N-methyltransferase EHMT2	EHMT2		27.6722	28.0878	28.2732	27.6734	27.2628	27.9896	27.559	27.8632
O14681;O14681-3	Etoposide-induced protein 2.4 homolog	EI24		28.5653	29.1441	28.2307	28.502	28.1346	27.3936	27.8719	29.749
P41567	Eukaryotic translation initiation factor 1	EIF1		33.3857	33.0318	33.4679	32.9396	33.554	33.0108	34.3663	33.1944
Q8N9N8	Probable RNA-binding protein EIF1AD	EIF1AD		28.5097	28.5661	28.5418	28.9099	28.4833	29.0551	28.6514	28.6979
P47813	Eukaryotic translation initiation factor 1A, X-chromosomal	EIF1AX		30.8583	33.5309	31.194	33.0807	31.375	33.1922	31.5488	32.4275
Q9BY44;Q9BY44-3;Q9BY44-4	Eukaryotic translation initiation factor 2A;Eukaryotic translation initiation factor 2A, N-terminally processed	EIF2A		32.6178	32.4219	32.758	32.3807	32.8184	32.3158	32.9779	32.6256
P19525;P19525-2	Interferon-induced, double-stranded RNA-activated protein kinase	EIF2AK2		32.9295	32.3499	32.8955	32.277	33.0241	32.4146	33.0373	32.4027
Q9NZJ5	Eukaryotic translation initiation factor 2-alpha kinase 3	EIF2AK3		26.6796	26.0146	26.3853	26.5676	26.3854	26.0471	25.6375	26.064
Q9P2K8;Q9P2K8-2;Q9P2K8-3	Eukaryotic translation initiation factor 2-alpha kinase 4	EIF2AK4		31.1157	30.5972	31.3292	30.7248	31.0877	31.2072	30.6043	30.685
Q14232	Translation initiation factor eIF-2B subunit alpha	EIF2B1		31.7573	31.24	31.5612	31.319	31.6186	30.8379	31.1876	30.976
P49770	Translation initiation factor eIF-2B subunit beta	EIF2B2		30.4059	31.2685	30.4264	31.2319	30.6296	31.5449	30.803	30.8
Q9NR50;Q9NR50-3;Q9NR50-2	Translation initiation factor eIF-2B subunit gamma	EIF2B3		31.4029	31.6302	31.1556	31.537	31.1639	31.5899	30.9148	31.0609
Q9UI10-3;Q9UI10-2	Translation initiation factor eIF-2B subunit delta	EIF2B4		30.6855	30.703	30.4954	30.6301	30.2443	30.2114	30.261	30.3297
Q9UI10	Translation initiation factor eIF-2B subunit delta	EIF2B4		26.7281	27.0747	26.2748	27.1096	NaN	27.1521	26.1332	26.9972
Q13144	Translation initiation factor eIF-2B subunit epsilon	EIF2B5		30.7248	30.9839	30.6383	30.8842	30.8607	31.2455	30.5641	30.9143
P41214;P41214-2	Eukaryotic translation initiation factor 2D	EIF2D		30.6051	30.4972	30.6269	30.71	30.3509	31.0103	30.5114	30.5411
P05198	Eukaryotic translation initiation factor 2 subunit 1	EIF2S1		33.4192	34.3233	33.6455	34.6524	33.5634	34.2346	33.829	34.5096
P20042	Eukaryotic translation initiation factor 2 subunit 2	EIF2S2		33.1158	33.28	33.4527	33.351	33.4619	33.3874	33.6433	33.6389
P41091;Q2VIR3;Q2VIR3-2	Eukaryotic translation initiation factor 2 subunit 3;Putative eukaryotic translation initiation factor 2 subunit 3-like protein	EIF2S3;EIF2S3L		34.4024	34.5038	34.3014	34.7225	34.5364	34.6952	34.7267	34.5493
Q14152;Q14152-2	Eukaryotic translation initiation factor 3 subunit A	EIF3A		34.6497	35.0867	34.4439	35.0509	34.466	35.1584	34.3615	34.9169
P55884;P55884-2	Eukaryotic translation initiation factor 3 subunit B	EIF3B		33.7843	33.7998	33.8885	33.4804	33.8995	33.7859	33.8034	33.7991
Q99613;Q99613-2;B5ME19	Eukaryotic translation initiation factor 3 subunit C;Eukaryotic translation initiation factor 3 subunit C-like protein	EIF3C;EIF3CL		34.2212	34.7302	34.2477	34.6118	34.0991	34.6444	33.7823	34.3687
O15371;O15371-3;O15371-2	Eukaryotic translation initiation factor 3 subunit D	EIF3D		33.9841	33.502	33.7674	33.7756	33.6008	33.7227	33.4267	33.433
P60228	Eukaryotic translation initiation factor 3 subunit E	EIF3E		32.7472	33.1089	32.5131	32.8007	32.5522	32.9823	32.2859	32.9643
O00303	Eukaryotic translation initiation factor 3 subunit F	EIF3F		32.6199	33.3259	32.3338	32.8699	32.4032	33.1534	32.6344	33.2598
O75821	Eukaryotic translation initiation factor 3 subunit G	EIF3G		33.2422	32.9323	33.2688	33.0608	33.2276	32.8923	33.199	32.9857
O15372	Eukaryotic translation initiation factor 3 subunit H	EIF3H		32.5822	32.7167	32.5076	32.7121	32.5143	32.5439	32.0085	32.9153
Q13347	Eukaryotic translation initiation factor 3 subunit I	EIF3I		33.4135	33.6221	33.5182	33.6621	33.6076	33.8171	33.523	33.7537
O75822;O75822-3	Eukaryotic translation initiation factor 3 subunit J	EIF3J		32.5711	32.5213	32.7231	32.9958	32.7981	32.9269	33.0067	33.2757
Q9UBQ5;Q9UBQ5-2	Eukaryotic translation initiation factor 3 subunit K	EIF3K		32.1441	32.5089	32.0331	32.2106	32.3712	32.34	31.8404	32.3722
Q9Y262;Q9Y262-2	Eukaryotic translation initiation factor 3 subunit L	EIF3L		33.4636	33.7422	33.2409	33.6429	33.0862	33.3936	32.9478	33.4583
Q7L2H7;Q7L2H7-2	Eukaryotic translation initiation factor 3 subunit M	EIF3M		33.1574	32.7702	33.0173	32.5993	33.2288	32.5824	32.7199	32.469
P60842;P60842-2	Eukaryotic initiation factor 4A-I	EIF4A1		35.5657	36.025	35.6701	36.2126	35.4515	35.9958	35.4891	36.4369
Q14240	Eukaryotic initiation factor 4A-II;Eukaryotic initiation factor 4A-II, N-terminally processed	EIF4A2		33.0773	32.7083	32.7554	32.232	32.8637	32.7379	32.8221	32.3579
P38919	Eukaryotic initiation factor 4A-III;Eukaryotic initiation factor 4A-III, N-terminally processed	EIF4A3		32.6295	32.7313	32.5018	32.5254	32.0968	32.4932	32.2742	32.7225
P23588;P23588-2	Eukaryotic translation initiation factor 4B	EIF4B		32.587	33.2953	32.556	33.5504	32.8721	33.5995	32.6299	33.3564
P06730;P06730-2;P06730-3	Eukaryotic translation initiation factor 4E	EIF4E		31.6937	32.1927	32.1365	32.3436	31.7802	32.7504	31.801	32.129
O60573;O60573-2	Eukaryotic translation initiation factor 4E type 2	EIF4E2		28.5919	28.6243	30.317	28.135	29.1732	28.6537	28.1747	28.3679
Q13541	Eukaryotic translation initiation factor 4E-binding protein 1	EIF4EBP1		28.8254	29.343	28.6276	29.9706	29.4502	29.9649	29.1142	30.2118
Q13542	Eukaryotic translation initiation factor 4E-binding protein 2	EIF4EBP2		28.5063	29.3244	29.5037	28.8998	29.5485	29.6849	28.3865	28.6468
Q9NRA8;Q9NRA8-3;Q9NRA8-2	Eukaryotic translation initiation factor 4E transporter	EIF4ENIF1		28.7915	29.0244	29.1366	28.9945	29.1956	28.8521	29.0265	28.7926
Q04637-8;Q04637-7	Eukaryotic translation initiation factor 4 gamma 1	EIF4G1		34.8881	35.1094	34.9373	35.0812	34.9455	35.0854	34.8181	35.0048
P78344;P78344-2	Eukaryotic translation initiation factor 4 gamma 2	EIF4G2		32.8163	33.2893	32.9441	33.3488	32.6472	33.0466	32.6499	33.3225
O43432-3;O43432;O43432-4	Eukaryotic translation initiation factor 4 gamma 3	EIF4G3		32.6012	32.4677	32.5567	32.4471	32.5233	32.1777	32.3692	31.915
Q15056;Q15056-2	Eukaryotic translation initiation factor 4H	EIF4H		33.2952	33.7779	33.4065	33.8065	33.6981	33.7103	33.4858	33.4751
P55010	Eukaryotic translation initiation factor 5	EIF5		33.8241	33.7236	33.9716	33.7259	33.895	33.5775	33.9731	33.9903
P63241;P63241-2;Q6IS14	Eukaryotic translation initiation factor 5A-1;Eukaryotic translation initiation factor 5A-1-like	EIF5A;EIF5AL1		35.1846	35.5917	35.3694	35.6094	35.1562	35.2852	35.398	35.8164
O60841	Eukaryotic translation initiation factor 5B	EIF5B		32.9185	33.378	32.9308	33.1686	32.8476	33.2707	32.837	33.2954
P56537;P56537-2	Eukaryotic translation initiation factor 6	EIF6		33.4748	32.7751	33.7095	32.855	33.5586	32.924	33.4913	32.6536
Q9H777	Zinc phosphodiesterase ELAC protein 1	ELAC1		26.6665	24.9179	26.668	NaN	26.5204	26.3712	NaN	26.6276
Q9BQ52;Q9BQ52-4;Q9BQ52-3	Zinc phosphodiesterase ELAC protein 2	ELAC2		29.6316	29.8033	29.6019	29.8189	29.3295	29.5729	29.2192	29.5839
Q15717;Q15717-2	ELAV-like protein 1	ELAVL1		32.5174	32.0777	32.9169	32.2513	32.6768	32.5739	33.0941	32.6479
P32519;P32519-2	ETS-related transcription factor Elf-1	ELF1		26.2302	25.9657	26.3805	25.9682	26.5218	26.6246	25.8505	25.5263
Q15723-4;Q15723-2;Q15723-3;Q15723;Q15723-1	ETS-related transcription factor Elf-2	ELF2		24.5459	25.2655	24.9456	25.2435	24.0235	25.6029	24.298	24.9317
P0C7U0	Protein ELFN1	ELFN1		25.876	25.6231	26.3459	NaN	26.5366	25.9351	23.3386	NaN
Q96JJ3;Q96JJ3-3	Engulfment and cell motility protein 2	ELMO2		32.1035	32.2964	32.0318	32.3747	32.2125	32.5658	31.933	32.2227
Q8IZ81	ELMO domain-containing protein 2	ELMOD2		30.3152	30.8571	29.9124	31.1287	30.2743	30.7222	30.1858	30.4781
Q6PJG2	ELM2 and SANT domain-containing protein 1	ELMSAN1		28.0977	27.3736	28.0702	26.8332	27.889	27.732	26.6602	26.6127
P60002	Transcription elongation factor 1 homolog	ELOF1		26.7116	28.4227	27.8078	28.7391	28.1672	28.9212	27.4075	28.9513
Q9BW60;Q9BW60-2	Elongation of very long chain fatty acids protein 1	ELOVL1		30.0128	30.5923	30.0037	30.4716	30.1658	29.9158	29.8361	30.9469
Q9NYP7;Q9NYP7-2	Elongation of very long chain fatty acids protein 5	ELOVL5		26.3637	28.0212	27.9382	28.4945	28.1073	29.5951	28.6225	30.3446
Q6IA86;Q6IA86-3;Q6IA86-6;Q6IA86-5;Q6IA86-2;Q6IA86-7;Q6IA86-4	Elongator complex protein 2	ELP2		30.2402	30.2621	30.1884	30.3767	30.3624	30.3704	29.8337	29.6039
Q9H9T3-2;Q9H9T3;Q9H9T3-4;Q9H9T3-5	Elongator complex protein 3	ELP3		29.9379	29.3824	29.6747	29.6127	29.282	28.9113	29.2819	29.183
Q96EB1;Q96EB1-3;Q96EB1-2	Elongator complex protein 4	ELP4		27.7521	27.398	28.2571	27.7176	28.2402	27.6457	27.6823	27.6996
Q8TE02;Q8TE02-4;Q8TE02-3;Q8TE02-2	Elongator complex protein 5	ELP5		26.7162	24.6307	27.1078	25.0974	26.9152	25.6282	26.833	24.1619
[truncated: 5,600 more rows]

## Sheet: HeLa intensity data
Majority protein IDs	Protein names	Gene names	Lysosomal	LFQ HeLa Con1	LFQ HeLa Con2	LFQ HeLa Con3	LFQ HeLa AP5KOC2_1	LFQ HeLa AP5KOC2_2	LFQ HeLa AP5KOC2_3	LFQ HeLa AP5KOC6_1	LFQ HeLa AP5KOC6_2	LFQ HeLa AP5KOC6_3
Q9NRG9;Q9NRG9-2	Aladin	AAAS		30.0921	29.8195	29.5928	29.8891	29.6702	29.2677	29.9444	29.6647	29.5462
Q86V21;Q86V21-2	Acetoacetyl-CoA synthetase	AACS		29.4502	29.9791	30.0627	29.7976	29.6788	29.7562	29.6369	29.8926	29.9369
Q6PD74;Q6PD74-2	Alpha- and gamma-adaptin-binding protein p34	AAGAB		25.585	25.604	26.5792	26.4582	26.6899	26.6781	25.6916	25.8882	25.8435
Q2M2I8;Q2M2I8-2	AP2-associated protein kinase 1	AAK1		27.413	27.6179	27.0358	27.0653	27.0951	27.2554	27.0729	27.0716	27.3183
Q9H7C9;Q9H7C9-3;Q9H7C9-2	Mth938 domain-containing protein	AAMDC		28.2585	27.9095	27.7691	28.5052	27.4012	27.9398	28.438	28.3761	28.3955
Q13685	Angio-associated migratory cell protein	AAMP		29.3928	29.4943	29.2384	29.3554	29.3397	29.3135	29.124	29.1866	29.6042
Q9Y312	Protein AAR2 homolog	AAR2		28.0799	27.3564	27.5028	28.3058	27.3622	28.0151	27.8624	27.6842	27.9153
P49588;P49588-2	Alanine--tRNA ligase, cytoplasmic	AARS		34.7034	34.8158	34.8222	34.6251	34.6941	34.6964	34.5525	34.7309	34.8243
Q5JTZ9	Alanine--tRNA ligase, mitochondrial	AARS2		30.1473	30.1805	30.3033	29.1054	29.7976	29.2383	29.0209	30.0089	30.4557
Q9BTE6;Q9BTE6-2;Q9BTE6-3	Alanyl-tRNA editing protein Aarsd1	AARSD1		29.1003	29.3651	29.397	28.9806	28.9242	29.4181	29.3814	29.6263	29.1026
Q9NRN7	L-aminoadipate-semialdehyde dehydrogenase-phosphopantetheinyl transferase	AASDHPPT		28.6307	28.8295	29.2046	29.0727	29.2629	29.1173	28.9363	28.7759	29.2196
Q9NY61	Protein AATF	AATF		29.391	29.2329	29.0857	29.4815	29.1526	28.9069	29.7224	28.6423	29.15
Q9BZC7;Q9BZC7-3;Q9BZC7-2	ATP-binding cassette sub-family A member 2	ABCA2		24.3448	24.6649	24.4204	24.0386	24.2916	24.5943	24.2937	24.6302	24.1515
Q8WWZ7;Q8WWZ7-2	ATP-binding cassette sub-family A member 5	ABCA5		NaN	21.2624	20.206	20.83	21.2401	21.527	NaN	21.2315	22.2435
P08183;P08183-2	Multidrug resistance protein 1	ABCB1		29.5612	29.0717	29.1654	28.6929	28.7152	28.7605	29.6137	29.5354	29.4029
Q9NRK6	ATP-binding cassette sub-family B member 10, mitochondrial	ABCB10		27.4238	27.7663	27.5131	27.2215	27.7332	27.6113	27.4813	27.4336	27.3477
Q9NP58;Q9NP58-4	ATP-binding cassette sub-family B member 6, mitochondrial	ABCB6		28.4333	28.723	28.059	28.0659	28.5397	28.3032	27.6294	28.4336	28.1641
O75027;O75027-2;O75027-3	ATP-binding cassette sub-family B member 7, mitochondrial	ABCB7		28.7811	28.8892	28.753	28.7654	28.828	28.7579	28.8864	28.6737	28.7992
Q9NUT2;Q9NUT2-5;Q9NUT2-4;Q9NUT2-2;Q9NUT2-3	ATP-binding cassette sub-family B member 8, mitochondrial	ABCB8		23.9028	24.7921	24.4962	24.1837	24.8611	23.404	24.4516	24.4984	24.1264
P33527;P33527-9;P33527-2;P33527-3;P33527-5;P33527-4;P33527-6;P33527-7;P33527-8	Multidrug resistance-associated protein 1	ABCC1		29.0379	29.2372	29.3871	29.0064	28.9772	28.9399	29.0953	29.2472	29.2279
Q96J66;Q96J66-2	ATP-binding cassette sub-family C member 11	ABCC11		NaN	23.8667	23.817	23.7499	23.6971	23.7574	23.8971	23.8098	24.2919
Q92887	Canalicular multispecific organic anion transporter 1	ABCC2		27.9823	27.8973	27.287	28.2279	27.5969	27.3738	27.9103	27.4498	27.214
O15438;O15438-4;O15438-2	Canalicular multispecific organic anion transporter 2	ABCC3		25.2604	25.08	24.4635	24.2455	23.7897	22.6116	24.0369	24.5563	24.1993
O15439;O15439-2;O15439-3;O15439-4	Multidrug resistance-associated protein 4	ABCC4		29.2913	29.415	29.8835	29.4037	29.4308	29.8317	29.5658	29.4043	29.7377
O15440;O15440-5	Multidrug resistance-associated protein 5	ABCC5		26.4156	25.5578	25.5548	25.8243	25.2914	25.5239	25.3573	25.4196	25.2522
P33897	ATP-binding cassette sub-family D member 1	ABCD1		29.1026	29.0653	28.9013	28.7216	28.5108	28.5447	28.7174	28.6878	28.5895
P28288;P28288-2	ATP-binding cassette sub-family D member 3	ABCD3		31.3216	31.5668	31.5781	31.1401	31.4589	31.555	31.1582	31.4419	31.2931
P61221	ATP-binding cassette sub-family E member 1	ABCE1		31.7536	31.8162	31.978	31.6047	32.0756	31.956	31.6729	31.8089	31.6045
Q8NE71;Q8NE71-2	ATP-binding cassette sub-family F member 1	ABCF1		33.0884	32.9166	32.78	32.9541	32.8071	32.9193	32.9356	32.8205	32.7673
Q9UG63;Q9UG63-2	ATP-binding cassette sub-family F member 2	ABCF2		32.4167	32.1869	32.178	32.3219	32.1461	32.1548	32.2541	32.1428	32.2335
Q9NUQ8;Q9NUQ8-2	ATP-binding cassette sub-family F member 3	ABCF3		30.6181	29.9691	30.1325	30.5296	30.1019	30.3442	30.1098	30.1546	30.4584
Q9UNQ0;Q9UNQ0-2	ATP-binding cassette sub-family G member 2	ABCG2		31.8947	31.6404	31.9246	31.7319	31.6604	31.9318	31.4243	31.328	31.5522
Q9NUJ1;Q9NUJ1-2	Mycophenolic acid acyl-glucuronide esterase, mitochondrial	ABHD10		29.935	29.9648	29.8098	29.9472	30.1318	30.0907	30.2509	30.0156	29.5178
Q8NFV4;Q8NFV4-4;Q8NFV4-6	Alpha/beta hydrolase domain-containing protein 11	ABHD11		26.5507	27.6028	27.5924	27.0601	27.2447	27.2727	27.0936	27.4648	27.3616
Q8N2K0;Q8N2K0-2;Q8N2K0-3	Monoacylglycerol lipase ABHD12	ABHD12		28.5955	28.7434	28.7028	28.5607	28.7177	28.6854	28.5701	28.866	28.4198
Q7L211	Alpha/beta hydrolase domain-containing protein 13	ABHD13		23.0337	21.1547	22.1354	22.8204	21.13	21.0599	21.3778	21.5851	22.2608
Q96IU4	Alpha/beta hydrolase domain-containing protein 14B	ABHD14B		30.647	30.6935	30.6616	30.5614	30.7038	30.7446	30.4963	30.7343	30.8203
O95870;O95870-2	Abhydrolase domain-containing protein 16A	ABHD16A		28.4802	28.7976	28.6112	28.3679	28.5537	28.3862	28.2207	28.2822	28.4045
Q5VST6;Q5VST6-2	Alpha/beta hydrolase domain-containing protein 17B	ABHD17B		25.5657	25.9092	26.2014	24.9817	25.7169	26.0487	25.1914	25.6629	25.1172
Q8WU67	Phospholipase ABHD3	ABHD3		24.3267	25.1162	22.9741	24.5498	24.3746	23.3934	24.8418	24.6454	24.1688
Q9BV23	Monoacylglycerol lipase ABHD6	ABHD6		26.1313	26.5611	26.0685	26.2783	26.4353	25.769	26.1737	26.3312	25.8034
Q8IZP0;Q8IZP0-3;Q8IZP0-2;Q8IZP0-4;Q8IZP0-5;Q8IZP0-6;Q8IZP0-9;Q8IZP0-10;Q8IZP0-8;Q8IZP0-7;Q8IZP0-12;Q8IZP0-11	Abl interactor 1	ABI1		28.6476	28.7833	28.6827	28.6458	28.6508	28.7349	28.9617	28.5011	28.9075
Q9NYB9;Q9NYB9-2;Q9NYB9-4;Q9NYB9-3	Abl interactor 2	ABI2		25.0668	25.5092	24.9798	24.8534	24.215	24.8818	25.444	24.7091	25.2844
P00519;P00519-2	Tyrosine-protein kinase ABL1	ABL1		25.2382	25.1096	25.0811	24.3261	25.0331	25.6666	24.7055	26.0377	25.028
P42684;P42684-6;P42684-7;P42684-5;P42684-4;P42684-10;P42684-2;P42684-3;P42684-8	Abelson tyrosine-protein kinase 2	ABL2		24.4693	25.6248	26.1483	25.1329	25.9845	26.287	25.6537	25.3866	25.6794
O14639;O14639-2;O14639-5;O14639-4;O14639-3;O14639-6	Actin-binding LIM protein 1	ABLIM1		29.485	29.6788	30.1048	29.729	29.8643	29.2285	30.1375	29.7203	29.3594
Q12979;Q12979-4;Q12979-2	Active breakpoint cluster region-related protein	ABR		28.0386	28.2991	27.8777	28.073	27.4941	27.6842	27.9015	27.628	27.6799
Q9ULW3	Activator of basal transcription 1	ABT1		27.3517	27.0672	26.5727	27.2195	26.9801	26.8747	27.413	26.5266	26.6156
Q8N961;Q8N961-2	Ankyrin repeat and BTB/POZ domain-containing protein 2	ABTB2		26.5553	27.128	26.9022	27.2594	26.8645	27.549	26.9089	26.6262	27.3026
P09110;P09110-2	3-ketoacyl-CoA thiolase, peroxisomal	ACAA1		26.573	27.4235	26.9383	26.3012	27.9003	27.6921	26.9564	27.2275	27.0264
P42765	3-ketoacyl-CoA thiolase, mitochondrial	ACAA2		31.2734	31.5711	31.4188	31.2257	31.4572	31.4278	31.4751	31.5986	31.4325
Q13085;Q13085-4;Q13085-2;Q13085-3	Acetyl-CoA carboxylase 1;Biotin carboxylase	ACACA		32.2221	32.1119	32.2603	32.3368	32.3237	32.22	32.1541	32.1908	32.3487
Q6JQN1;Q6JQN1-5;Q6JQN1-2	Acyl-CoA dehydrogenase family member 10	ACAD10		23.5951	24.6179	23.4574	22.434	24.0024	24.6787	23.6313	24.1095	24.7566
Q709F0;Q709F0-3;Q709F0-2	Acyl-CoA dehydrogenase family member 11	ACAD11		29.0716	29.1212	28.9276	28.9771	29.0191	29.0861	28.6365	28.696	28.2171
Q9UKU7;Q9UKU7-2;Q9UKU7-3	Isobutyryl-CoA dehydrogenase, mitochondrial	ACAD8		22.7261	24.5754	23.7809	23.6401	23.9048	23.8965	24.0258	24.7743	25.0199
Q9H845	Acyl-CoA dehydrogenase family member 9, mitochondrial	ACAD9		31.0264	30.8758	30.9811	30.9087	30.8752	30.8785	31.0474	30.7611	30.9725
P11310;P11310-2	Medium-chain specific acyl-CoA dehydrogenase, mitochondrial	ACADM		31.69	31.9473	31.7598	31.7251	32.0107	31.9309	31.7241	31.8357	32.0431
P16219	Short-chain specific acyl-CoA dehydrogenase, mitochondrial	ACADS		26.698	26.7803	27.0433	26.3249	26.9009	26.7023	26.0768	26.5469	26.702
P45954;P45954-2	Short/branched chain specific acyl-CoA dehydrogenase, mitochondrial	ACADSB		28.6284	29.1043	28.9951	28.6116	28.7476	29.0071	28.7149	29.0277	29.1789
P49748;P49748-3;P49748-2	Very long-chain specific acyl-CoA dehydrogenase, mitochondrial	ACADVL		32.6421	32.8073	32.8582	32.5824	32.6929	32.7905	32.6609	32.7034	32.6794
Q15057	Arf-GAP with coiled-coil, ANK repeat and PH domain-containing protein 2	ACAP2		28.3925	29.0061	29.0081	28.7782	29.024	28.9477	28.4996	28.8297	28.7376
P24752	Acetyl-CoA acetyltransferase, mitochondrial	ACAT1		32.8272	33.1107	32.8293	32.9372	33.1563	32.9496	33.0236	33.4249	33.3866
Q9BWD1;Q9BWD1-2	Acetyl-CoA acetyltransferase, cytosolic	ACAT2		31.9793	31.563	31.6398	32.2133	31.801	32.0223	31.9914	32.0114	31.7165
Q9H3P7	Golgi resident protein GCP60	ACBD3		30.2169	30.4822	30.0808	30.534	30.157	30.1363	30.2694	30.4568	30.3803
Q5T8D3	Acyl-CoA-binding domain-containing protein 5	ACBD5		29.1207	29.0274	28.9067	29.0785	28.9453	28.8198	29.0428	28.8237	28.8508
Q9BR61	Acyl-CoA-binding domain-containing protein 6	ACBD6		27.9561	28.0516	27.4838	27.4545	27.9404	27.651	27.7504	27.5236	27.6045
Q96AP0;Q96AP0-2	Adrenocortical dysplasia protein homolog	ACD		NaN	23.7422	25.3655	24.6631	26.2063	25.454	24.9898	23.7294	25.2706
Q9UKV3;Q9UKV3-5	Apoptotic chromatin condensation inducer in the nucleus	ACIN1		32.1562	32.2192	32.1187	32.2771	32.19	32.1358	32.4726	32.2401	32.0069
P53396	ATP-citrate synthase	ACLY		34.35	34.5197	34.533	34.5593	34.6559	34.5685	34.2663	34.4452	34.4789
P21399	Cytoplasmic aconitate hydratase	ACO1		31.3995	31.6257	31.7207	31.5053	31.4983	31.4778	31.2639	31.3984	31.4169
Q99798	Aconitate hydratase, mitochondrial	ACO2		32.7132	32.7079	32.6781	32.6664	32.661	32.6447	32.7432	32.8043	32.8139
Q86TX2;P49753-2	Acyl-coenzyme A thioesterase 1;Acyl-coenzyme A thioesterase 2, mitochondrial	ACOT1;ACOT2		26.2919	26.4159	26.8785	26.27	26.2767	26.6807	26.3988	26.1461	26.5185
Q8WXI4;Q8WXI4-2	Acyl-coenzyme A thioesterase 11	ACOT11		22.3113	NaN	23.7558	23.7117	24.8555	23.3633	24.5875	24.5848	22.0155
Q9NPJ3;Q9NPJ3-2	Acyl-coenzyme A thioesterase 13;Acyl-coenzyme A thioesterase 13, N-terminally processed	ACOT13		29.74	29.336	29.7326	29.6151	29.9986	30.216	29.6506	29.3138	29.696
P49753	Acyl-coenzyme A thioesterase 2, mitochondrial	ACOT2		30.309	31.0011	30.8494	31.0902	31.1699	31.0092	31.0242	30.8861	30.6071
O00154-4;O00154;O00154-6;O00154-7;O00154-5;O00154-2;O00154-3	Cytosolic acyl coenzyme A thioester hydrolase	ACOT7		31.2813	31.0832	31.1651	31.2608	31.2523	30.9754	31.3461	31.2209	31.1412
O14734	Acyl-coenzyme A thioesterase 8	ACOT8		24.3336	25.4741	22.0847	25.0783	25.4586	24.92	24.802	24.6661	25.5059
Q9Y305;Q9Y305-3;Q9Y305-2;Q9Y305-4	Acyl-coenzyme A thioesterase 9, mitochondrial	ACOT9		30.8244	30.728	31.0779	30.8229	30.4921	30.8505	30.6791	30.7031	31.0368
Q15067;Q15067-2;Q15067-3	Peroxisomal acyl-coenzyme A oxidase 1	ACOX1		29.7755	30.6351	30.5999	29.8618	30.5501	30.5305	30.1997	30.5626	30.4192
O15254;O15254-2	Peroxisomal acyl-coenzyme A oxidase 3	ACOX3		26.013	21.3977	21.7349	21.972	23.2444	22.4415	26.8726	26.2915	21.6739
P24666;P24666-4;P24666-3	Low molecular weight phosphotyrosine protein phosphatase	ACP1		30.1889	30.2773	30.3686	30.4186	29.8894	30.3172	30.4286	30.2119	30.291
P24666-2	Low molecular weight phosphotyrosine protein phosphatase	ACP1		24.6487	25.1366	25.2149	24.9717	21.5168	25.5258	22.057	21.3355	25.1371
P11117	Lysosomal acid phosphatase	ACP2	1	28.4521	28.5152	28.4708	28.8576	28.3723	28.3818	28.6995	28.4399	28.1272
Q96CM8;Q96CM8-3;Q96CM8-2;Q96CM8-4	Acyl-CoA synthetase family member 2, mitochondrial	ACSF2		29.3399	29.6717	29.6665	29.9751	30.019	29.8333	29.5164	29.4157	29.4878
Q4G176	Acyl-CoA synthetase family member 3, mitochondrial	ACSF3		29.1954	29.1955	28.9513	29.2837	29.1887	29.2005	29.1688	29.104	29.0466
P33121;P33121-2;P33121-3;Q9ULC5;Q9ULC5-3;Q9ULC5-4	Long-chain-fatty-acid--CoA ligase 1;Long-chain-fatty-acid--CoA ligase 5	ACSL1;ACSL5		23.8243	24.4536	23.6133	23.5529	25.3187	23.7593	25.2771	23.86	23.6228
O95573	Long-chain-fatty-acid--CoA ligase 3	ACSL3		31.9993	32.057	32.0186	32.0786	32.0632	31.9982	32.133	32.0927	32.1662
O60488;O60488-2	Long-chain-fatty-acid--CoA ligase 4	ACSL4		30.8268	30.9127	30.9365	30.7974	30.8209	30.915	30.5453	30.9898	30.9054
Q9NR19;Q9NR19-2	Acetyl-coenzyme A synthetase, cytoplasmic	ACSS2		28.4138	28.5178	28.7343	28.6591	28.4403	28.754	28.829	28.1662	28.9411
P68133;P68032;P63267;P62736;P63267-2	Actin, alpha skeletal muscle;Actin, alpha cardiac muscle 1;Actin, gamma-enteric smooth muscle;Actin, aortic smooth muscle	ACTA1;ACTC1;ACTG2;ACTA2		34.4171	34.2994	34.7473	34.5576	34.6379	34.8521	34.2803	34.6749	34.3536
P60709	Actin, cytoplasmic 1;Actin, cytoplasmic 1, N-terminally processed	ACTB		31.6527	32.1306	32.1484	31.3707	31.8498	31.7553	31.7202	32.1917	31.928
Q562R1	Beta-actin-like protein 2	ACTBL2		32.5325	32.9959	33.1414	27.5469	27.7763	27.9348	27.2282	25.7494	33.2942
P63261	Actin, cytoplasmic 2;Actin, cytoplasmic 2, N-terminally processed	ACTG1		37.9742	38.0059	37.9795	37.9472	37.9197	37.9142	37.8974	38.0111	37.9253
O96019;O96019-2	Actin-like protein 6A	ACTL6A		31.8391	31.7301	31.533	31.9841	31.6425	31.8277	31.9666	31.8971	31.6077
Q9H568	Actin-like protein 8	ACTL8		30.0263	29.4224	29.4785	30.3789	30.1925	29.6831	30.0027	29.5576	29.5201
P12814;P12814-3;P12814-2;P12814-4	Alpha-actinin-1	ACTN1		33.3431	33.2481	33.347	33.341	33.2117	33.2091	33.2164	33.1823	33.2424
O43707;O43707-2	Alpha-actinin-4	ACTN4		36.0112	35.842	35.7576	35.9094	35.7696	35.7284	35.8275	35.8107	35.7145
Q9NZ32	Actin-related protein 10	ACTR10		27.7463	28.1204	28.0204	27.5858	28.5918	27.969	27.6293	28.1715	28.513
P61163	Alpha-centractin	ACTR1A		31.7112	31.4557	31.6812	31.6889	31.6102	31.3796	31.6992	31.7751	31.4758
P42025	Beta-centractin	ACTR1B		28.0728	28.2947	28.3372	28.0345	28.2376	28.0881	27.7312	28.2966	28.399
P61160;P61160-2	Actin-related protein 2	ACTR2		31.9111	32.1126	32.2226	32.1504	32.1527	32.1785	32.1481	32.2039	32.2095
P61158	Actin-related protein 3	ACTR3		32.2225	32.1288	32.1695	31.9615	32.0827	31.9465	32.066	32.1718	32.2715
Q9H9F9	Actin-related protein 5	ACTR5		27.0623	27.2805	26.8391	27.3779	27.2752	27.0313	29.4336	27.5252	27.5857
Q9GZN1	Actin-related protein 6	ACTR6		26.191	27.0515	26.0605	26.6719	27.0588	27.2237	26.8498	27.0192	26.4184
Q9H981;Q9H981-2	Actin-related protein 8	ACTR8		27.0587	27.1879	27.2189	27.3531	27.3486	27.5215	27.4823	27.6835	27.2685
Q04771	Activin receptor type-1	ACVR1		24.1165	22.5458	23.6854	24.1316	24.1967	22.5534	24.0157	23.3068	24.1176
Q03154;Q03154-2;Q03154-3;Q03154-4	Aminoacylase-1	ACY1		28.2136	28.7462	29.132	28.3522	28.6254	28.9643	28.0712	28.6869	28.6702
P07311	Acylphosphatase-1	ACYP1		26.4339	26.2417	27.0448	26.738	26.8988	27.2986	26.4609	26.9373	26.8928
P14621	Acylphosphatase-2	ACYP2		24.6771	25.0542	25.5397	25.3251	24.9287	25.4658	25.2497	24.7919	25.0381
P00813	Adenosine deaminase	ADA		29.5351	29.6248	29.6136	29.4716	29.3541	29.901	29.182	29.1246	29.6435
Q6DHV7-2;Q6DHV7;Q6DHV7-3	Adenosine deaminase-like protein	ADAL		23.0483	23.6818	24.1523	23.9034	24.5888	24.3226	24.1155	24.3754	24.0698
O14672;O14672-2	Disintegrin and metalloproteinase domain-containing protein 10	ADAM10		29.1558	29.0587	28.965	29.1621	29.1087	28.8392	29.3296	28.8799	28.9089
Q13444;Q13444-9;Q13444-8;Q13444-2;Q13444-7;Q13444-6;Q13444-12;Q13444-5;Q13444-4;Q13444-3;Q13444-10;Q13444-11;Q13444-13	Disintegrin and metalloproteinase domain-containing protein 15	ADAM15		27.4607	27.829	27.8805	27.9123	27.8276	27.9225	27.6109	27.8247	27.6716
P78536;P78536-2	Disintegrin and metalloproteinase domain-containing protein 17	ADAM17		29.2379	28.7346	28.8541	29.3339	29.4334	29.2423	28.7261	28.616	28.6044
Q13443;Q13443-2	Disintegrin and metalloproteinase domain-containing protein 9	ADAM9		28.2276	28.567	28.54	28.3192	28.6102	28.3555	28.1669	28.6595	28.2747
O15072	A disintegrin and metalloproteinase with thrombospondin motifs 3	ADAMTS3		25.9386	25.0829	24.6482	25.8029	24.7225	23.795	23.4076	25.1984	24.2249
P55265;P55265-4;P55265-5	Double-stranded RNA-specific adenosine deaminase	ADAR		33.1286	33.2286	33.1625	33.1824	33.2506	33.0272	33.2724	33.094	33.028
P55265-2;P55265-3	Double-stranded RNA-specific adenosine deaminase	ADAR		27.0581	26.989	27.6115	26.515	26.4374	24.6933	27.062	26.8827	26.3072
P78563;P78563-5;P78563-2;P78563-4;P78563-3;P78563-6	Double-stranded RNA-specific editase 1	ADARB1		28.6584	28.5406	28.5101	28.6738	28.3336	28.4759	28.8741	28.1142	28.0923
Q9NS39	Double-stranded RNA-specific editase B2	ADARB2		24.3026	24.9496	25.4535	24.6449	25.1157	25.3054	25.2331	25.537	25.5542
Q9BUB4;Q9BUB4-2	tRNA-specific adenosine deaminase 1	ADAT1		27.8254	28.4728	28.5604	28.797	28.675	28.8727	28.8043	29.0046	28.4538
Q7Z6V5;Q7Z6V5-2	tRNA-specific adenosine deaminase 2	ADAT2		24.4396	24.8898	24.117	23.1577	24.2801	24.7271	21.4523	23.3359	25.2923
Q96EY9	Probable inactive tRNA-specific adenosine deaminase-like protein 3	ADAT3		26.1304	25.4321	24.3095	25.7619	24.9378	24.4695	25.5296	24.0513	24.8122
Q86TW2;Q86TW2-2;Q86TW2-3	Uncharacterized aarF domain-containing protein kinase 1	ADCK1		25.6002	24.5579	25.0957	25.093	24.6469	24.8445	24.3034	25.2069	26.106
Q8NI60;Q8NI60-3;Q8NI60-4	Atypical kinase ADCK3, mitochondrial	ADCK3		29.3047	27.7013	29.8185	27.337	29.5565	27.19	26.9225	27.203	30.6362
Q96D53;Q96D53-2	AarF domain-containing protein kinase 4	ADCK4		27.4219	27.8882	27.6474	27.353	27.6092	27.2181	27.4999	27.4722	27.0691
Q3MIX3	Uncharacterized aarF domain-containing protein kinase 5	ADCK5		22.5903	22.2189	22.9398	22.4633	21.7404	24.1162	22.9909	22.7202	22.5155
O60266;O60266-2	Adenylate cyclase type 3	ADCY3		24.3321	24.8026	25.0957	25.3314	25.02	25.207	25.7538	25.4328	25.568
O43306;O43306-2	Adenylate cyclase type 6	ADCY6		25.043	25.6959	25.8703	25.4998	25.3232	25.467	25.6923	25.5612	25.3454
O60503	Adenylate cyclase type 9	ADCY9		27.4667	27.5016	27.4361	27.8253	27.1639	27.6459	27.7203	27.6296	28.1495
P35611;P35611-2;P35611-6;P35611-3;P35611-4;P35611-5	Alpha-adducin	ADD1		28.4302	28.7353	28.6345	28.6289	28.9077	28.802	28.5287	29.0261	28.6807
Q9UEY8	Gamma-adducin	ADD3		27.1681	27.8002	27.8236	27.6074	27.9784	27.6904	27.2561	28.1114	28.0512
P11766	Alcohol dehydrogenase class-3	ADH5		32.8344	32.8779	33.1959	32.7433	33.0753	33.056	32.4306	33.0926	33.1339
Q9BV57;Q9BV57-2	1,2-dihydroxy-3-keto-5-methylthiopentene dioxygenase	ADI1		31.382	30.6672	30.7958	30.9704	31.0352	30.8817	30.5093	30.7401	30.315
Q96A54	Adiponectin receptor protein 1	ADIPOR1		20.829	22.0026	20.7439	23.1793	22.1025	21.9517	22.2864	NaN	23.1027
Q86V24	Adiponectin receptor protein 2	ADIPOR2		19.9837	NaN	19.6034	21.108	20.5959	20.0355	NaN	19.3054	19.6654
Q15847	Adipogenesis regulatory factor	ADIRF		27.2038	27.6867	27.5683	27.9343	28.4445	27.8214	28.9305	28.9095	28.6447
P55263;P55263-3;P55263-2;P55263-4	Adenosine kinase	ADK		31.4182	31.2272	31.2393	31.2833	30.7956	31.3096	31.5531	31.0001	31.4369
Q9H2P0	Activity-dependent neuroprotector homeobox protein	ADNP		31.4036	31.4511	31.3501	31.5007	31.7286	31.5698	31.6094	31.6985	31.3901
Q6IQ32	ADNP homeobox protein 2	ADNP2		25.9469	25.6023	25.4663	25.6547	25.7539	25.9201	25.3545	25.8581	25.6765
Q96SZ5	2-aminoethanethiol dioxygenase	ADO		27.1013	25.923	26.0577	26.9666	25.3754	25.957	26.8372	25.5212	25.8671
Q9BRR6;Q9BRR6-2;Q9BRR6-4;Q9BRR6-3	ADP-dependent glucokinase	ADPGK		28.308	27.933	27.8369	28.2113	28.2872	27.9421	28.2393	27.9988	27.8158
Q9NX46	Poly(ADP-ribose) glycohydrolase ARH3	ADPRHL2		28.3188	28.2488	28.6423	28.1882	28.8155	28.7265	28.2174	28.522	28.5691
P25098	Beta-adrenergic receptor kinase 1	ADRBK1		25.1964	24.7887	24.7269	25.3985	24.1692	24.6505	25.2131	24.0151	25.1013
Q16186	Proteasomal ubiquitin receptor ADRM1	ADRM1		29.9809	30.0069	29.618	29.8305	30.3263	30.1062	29.7673	29.703	29.6503
P30566;P30566-2	Adenylosuccinate lyase	ADSL		31.5735	31.4696	31.1015	31.6441	31.5412	31.4602	31.4473	31.4857	31.1281
P30520	Adenylosuccinate synthetase isozyme 2	ADSS		31.6625	31.3449	31.5344	31.8187	31.7408	31.2397	31.5402	31.3263	31.5529
Q6ZN18;Q6ZN18-3;Q6ZN18-2	Zinc finger protein AEBP2	AEBP2		25.7719	25.4987	25.8754	26.1316	26.3361	25.4923	25.6013	25.2968	26.0032
Q08117;Q08117-2	Amino-terminal enhancer of split	AES		27.9885	28.1669	27.2441	28.2087	27.6083	28.1289	28.1488	27.7207	28.6874
Q8N556;Q8N556-2	Actin filament-associated protein 1	AFAP1		30.2917	29.758	29.6978	30.2079	30.0585	29.8456	30.2187	30.1411	29.9993
P51825-2;P51825-3;P51825	AF4/FMR2 family member 1	AFF1		26.619	27.0829	26.5311	27.177	27.7313	27.8348	27.157	26.9007	27.0124
Q9UHB7;Q9UHB7-2	AF4/FMR2 family member 4	AFF4		27.8902	27.9807	28.0058	28.3504	27.9094	28.2016	28.1123	28.058	28.0883
Q9Y4W6	AFG3-like protein 2	AFG3L2		31.5557	31.5086	31.3941	31.5568	31.6448	31.7236	31.5204	31.6316	31.7482
Q6ULP2;Q6ULP2-5;Q6ULP2-2;Q6ULP2-4;Q6ULP2-3	Aftiphilin	AFTPH		26.7987	26.3502	26.6131	26.5234	26.9508	26.4104	26.3136	26.6793	26.8386
P20933	N(4)-(beta-N-acetylglucosaminyl)-L-asparaginase;Glycosylasparaginase alpha chain;Glycosylasparaginase beta chain	AGA	1	23.97	26.1583	25.1602	22.5425	25.854	25.858	24.8731	25.8548	25.3858
Q9UPQ3;Q9UPQ3-2;Q9UPQ3-3	Arf-GAP with GTPase, ANK repeat and PH domain-containing protein 1	AGAP1		NaN	23.2442	23.0638	23.019	22.5123	23.1198	22.9688	23.2647	23.1207
Q96P47;Q96P47-2;Q96P47-4;Q96P47-3;Q96P47-6;Q96P47-5	Arf-GAP with GTPase, ANK repeat and PH domain-containing protein 3	AGAP3		25.5635	25.7292	26.085	25.7042	25.8823	25.9199	25.8882	25.886	26.2238
P52594;P52594-2;P52594-3;P52594-4	Arf-GAP domain and FG repeat-containing protein 1	AGFG1		29.7536	30.1194	29.8707	29.9011	29.8256	29.6562	29.6595	30.246	29.7483
O95081;O95081-2	Arf-GAP domain and FG repeat-containing protein 2	AGFG2		24.5638	25.5631	26.2784	24.9392	24.4601	26.1412	25.417	24.5089	26.2762
Q8N302;Q8N302-3	Angiogenic factor with G patch and FHA domains 1	AGGF1		24.5581	24.5105	25.2493	22.6893	24.9923	25.366	23.6818	24.4844	25.5872
Q53H12	Acylglycerol kinase, mitochondrial	AGK		28.3699	28.3633	28.0969	27.8424	27.6665	27.5577	27.0344	27.2898	26.6952
P35573;P35573-2;P35573-3	Glycogen debranching enzyme;4-alpha-glucanotransferase;Amylo-alpha-1,6-glucosidase	AGL		31.8174	32.1784	31.9317	32.0742	32.3323	32.0808	32.029	32.2	31.7272
Q9UL18	Protein argonaute-1	AGO1		26.796	27.1616	27.118	26.9073	26.9669	26.8696	27.1139	27.2847	27.3437
Q9UKV8;Q9UKV8-2	Protein argonaute-2	AGO2		29.4327	29.5135	29.3448	29.6481	29.4407	29.3383	29.4848	29.2208	29.375
Q9H9G7;Q9H9G7-2	Protein argonaute-3	AGO3		24.4831	25.4896	25.0044	24.7919	25.1507	24.3513	25.1559	25.1026	23.2122
Q99943	1-acyl-sn-glycerol-3-phosphate acyltransferase alpha	AGPAT1		26.2536	26.8597	26.7129	26.5465	26.9402	26.941	26.7103	26.8803	26.6137
O15120	1-acyl-sn-glycerol-3-phosphate acyltransferase beta	AGPAT2		25.7722	25.9335	25.429	25.4917	26.247	25.602	25.9703	25.272	25.1835
Q9NRZ7;Q9NRZ7-2;Q9NRZ7-3	1-acyl-sn-glycerol-3-phosphate acyltransferase gamma	AGPAT3		26.6328	27.0154	26.8016	26.7095	26.7613	26.8773	26.2306	26.361	26.988
Q9NUQ2	1-acyl-sn-glycerol-3-phosphate acyltransferase epsilon	AGPAT5		26.0463	25.7918	26.1135	26.2816	25.6388	25.8793	26.177	25.8857	25.4161
Q86UL3	Glycerol-3-phosphate acyltransferase 4	AGPAT6		26.0953	26.8255	26.5936	25.9588	26.6173	26.8442	26.1641	26.7747	26.9594
Q53EU6	Glycerol-3-phosphate acyltransferase 3	AGPAT9		23.5902	23.2492	23.3977	23.6955	22.5316	23.1797	21.7405	23.149	23.2058
O00116	Alkyldihydroxyacetonephosphate synthase, peroxisomal	AGPS		30.9703	30.9666	30.7947	30.849	30.8885	30.878	30.7714	30.9567	30.7811
O95994	Anterior gradient protein 2 homolog	AGR2		27.5321	27.7086	27.5864	28.302	28.5321	28.0975	26.4847	27.3707	27.1473
O00468-6;O00468-3;O00468-7;O00468;O00468-5;O00468-4;O00468-2	Agrin;Agrin N-terminal 110 kDa subunit;Agrin C-terminal 110 kDa subunit;Agrin C-terminal 90 kDa fragment;Agrin C-terminal 22 kDa fragment	AGRN		27.4336	27.9853	27.7217	27.5835	27.5319	27.5244	27.1562	27.5176	27.686
Q9UPW5;Q9UPW5-2;Q9UPW5-3	Cytosolic carboxypeptidase 1	AGTPBP1		21.1867	24.0823	22.4974	22.4613	23.5314	22.5731	22.8498	23.0086	22.3441
Q6RW13	Type-1 angiotensin II receptor-associated protein	AGTRAP		25.2292	26.3671	26.4469	25.5035	26.618	26.8032	25.9668	26.3859	26.9251
Q8WYP5;Q8WYP5-2;Q8WYP5-3	Protein ELYS	AHCTF1		32.1147	32.0994	32.0104	32.0723	32.0412	32.1422	32.2452	31.9504	31.9198
P23526;P23526-2	Adenosylhomocysteinase	AHCY		34.2281	34.0726	34.2092	34.2865	34.0382	34.2133	34.1244	34.0751	34.3433
O43865;O43865-2	Putative adenosylhomocysteinase 2	AHCYL1		31.8617	32.1268	32.1864	31.8923	32.3041	32.0404	31.9471	31.9567	32.0038
Q96HN2;Q96HN2-2;Q96HN2-4;Q96HN2-3	Putative adenosylhomocysteinase 3	AHCYL2		25.0773	25.3997	25.7233	24.7639	24.7931	24.7968	24.949	24.1702	24.0869
Q5TGY3	AT-hook DNA-binding motif-containing protein 1	AHDC1		27.1222	26.3194	26.534	27.0659	26.7705	26.6926	26.5457	26.8987	26.3984
Q8N157;Q8N157-2;Q8N157-3	Jouberin	AHI1		20.5152	23.0174	22.698	19.4332	22.1194	22.1805	23.3727	22.8685	22.4504
Q09666	Neuroblast differentiation-associated protein AHNAK	AHNAK		36.5183	36.5104	36.5839	36.4024	36.4453	36.5698	36.5978	36.5305	36.6655
Q8IVF2;Q8IVF2-3	Protein AHNAK2	AHNAK2		30.1077	30.5023	30.7462	30.2668	30.4147	30.2887	30.1908	30.1923	30.5306
P35869	Aryl hydrocarbon receptor	AHR		24.6786	25.839	25.3144	24.0532	23.7502	25.1958	24.1205	25.8992	25.5529
O95433;O95433-2	Activator of 90 kDa heat shock protein ATPase homolog 1	AHSA1		32.1898	32.0353	32.1352	32.2231	32.0571	32.1921	32.2539	32.144	32.32
Q96BJ3;Q96BJ3-3	Axin interactor, dorsalization-associated protein	AIDA		24.3839	24.6074	25.1262	25.2716	24.9491	24.9434	25.1444	25.0044	24.3526
Q9BQI0;Q9BQI0-3;Q9BQI0-2;Q9BQI0-4	Allograft inflammatory factor 1-like	AIF1L		25.9239	26.4828	27.2513	26.6902	27.1699	27.0576	26.4147	26.9117	27.0491
O95831;O95831-3;O95831-2	Apoptosis-inducing factor 1, mitochondrial	AIFM1		32.0485	32.2315	32.0762	32.0879	32.166	32.1553	31.923	32.1869	32.3021
Q9BRQ8;Q9BRQ8-2	Apoptosis-inducing factor 2	AIFM2		29.1412	28.6461	28.5683	28.6222	28.7615	28.6313	28.6259	28.6089	28.2878
Q12904;Q12904-2	Aminoacyl tRNA synthase complex-interacting multifunctional protein 1;Endothelial monocyte-activating polypeptide 2	AIMP1		32.4322	32.3537	32.443	32.2678	32.498	32.4002	32.3537	32.2948	32.3301
Q13155	Aminoacyl tRNA synthase complex-interacting multifunctional protein 2	AIMP2		31.6684	31.8595	31.5571	31.6089	31.3603	31.2547	31.7686	31.6369	31.4265
O00170	AH receptor-interacting protein	AIP		30.6045	30.301	30.2549	30.7252	30.5506	30.3679	30.6786	30.5178	30.6835
Q96IF1	LIM domain-containing protein ajuba	AJUBA		26.1823	26.6223	26.7345	26.2945	25.7596	26.5844	26.9474	26.6158	26.7969
P00568	Adenylate kinase isoenzyme 1	AK1		31.0971	30.5683	31.0434	30.8603	31.0702	30.6849	30.725	31.0173	31.0273
P54819;P54819-2;P54819-5;P54819-3;P54819-6;P54819-4	Adenylate kinase 2, mitochondrial;Adenylate kinase 2, mitochondrial, N-terminally processed	AK2		32.768	32.8968	33.0012	32.7361	32.7966	32.9451	32.7567	32.6927	32.961
Q9UIJ7;Q9UIJ7-3;Q9UIJ7-2	GTP:AMP phosphotransferase AK3, mitochondrial	AK3		27.8267	27.9648	27.5044	28.0071	27.7426	27.9457	27.8517	27.9987	27.4562
P27144	Adenylate kinase 4, mitochondrial	AK4		30.6706	30.4812	30.3179	30.3854	30.2202	30.4015	30.3719	30.2602	30.1435
Q9Y3D8;Q9Y3D8-2	Adenylate kinase isoenzyme 6	AK6		29.0727	28.2788	28.5962	29.0763	28.721	28.4421	28.7293	28.8172	28.2892
Q92667;Q92667-2	A-kinase anchor protein 1, mitochondrial	AKAP1		29.2001	29.4016	29.2709	29.543	29.6045	29.5489	29.4853	29.525	29.6167
O43572	A-kinase anchor protein 10, mitochondrial	AKAP10		25.8156	26.4483	26.5398	26.1594	25.6193	26.6662	25.797	26.0986	26.3203
Q12802;Q12802-2;Q12802-4	A-kinase anchor protein 13	AKAP13		29.4752	29.5963	29.5592	29.7347	29.5571	29.5243	29.6142	29.7734	29.5046
Q02040;Q02040-2;Q02040-3	A-kinase anchor protein 17A	AKAP17A		29.1061	28.8406	29.0429	28.82	29.0143	28.917	29.1671	29.1296	28.8334
Q9Y2D5-6;Q9Y2D5-4;Q9Y2D5;Q9Y2D5-5;Q9Y2D5-7	A-kinase anchor protein 2	AKAP2		27.8117	27.7412	27.6789	28.0131	27.7146	27.8171	28.1892	28.26	28.0099
O43823	A-kinase anchor protein 8	AKAP8		29.8508	30.0255	30.1604	30.1865	30.2197	30.2056	30.386	30.3237	30.304
Q9ULX6;Q9ULX6-2	A-kinase anchor protein 8-like	AKAP8L		29.1034	29.0827	29.0484	29.1372	29.2054	28.7049	29.0602	29.0281	28.9993
Q99996;Q99996-5;Q99996-3;Q99996-2;Q99996-6	A-kinase anchor protein 9	AKAP9		28.8572	28.5697	28.0869	27.958	28.6036	28.2412	28.1247	28.3616	27.9597
Q53H80	Akirin-2	AKIRIN2		22.8821	22.0515	24.3791	23.5489	24.0033	24.2257	23.7374	23.9167	24.6269
P14550	Alcohol dehydrogenase [NADP(+)]	AKR1A1		32.1405	31.8577	31.8528	31.9791	31.9389	31.9828	31.7654	31.6703	32.1444
P15121	Aldose reductase	AKR1B1		33.3657	33.5407	33.4425	33.1054	32.797	33.2308	33.1226	33.1542	33.3651
O43488	Aflatoxin B1 aldehyde reductase member 2	AKR7A2		30.136	30.2317	30.0105	29.9801	30.1669	30.2734	30.0517	30.3169	29.6246
P31749;P31749-2	RAC-alpha serine/threonine-protein kinase	AKT1		27.2585	26.9147	27.1577	27.2978	27.2993	26.8546	27.1323	27.2689	26.9129
Q96B36;Q96B36-3	Proline-rich AKT1 substrate 1	AKT1S1		28.269	28.1582	27.8468	28.703	28.1601	28.2611	28.6982	27.956	28.2605
P31751;P31751-2	RAC-beta serine/threonine-protein kinase	AKT2		28.536	27.9799	27.8468	28.174	28.2615	27.8779	28.036	28.1139	28.273
Q9H8T0;Q9H8T0-2	AKT-interacting protein	AKTIP		25.2987	22.9744	25.1881	24.6377	24.0874	25.1989	23.9116	23.2506	25.5032
P13716;P13716-2	Delta-aminolevulinic acid dehydratase	ALAD		26.0725	25.2034	26.0476	26.4522	24.8885	26.1437	26.0061	25.9516	26.5873
P13196	5-aminolevulinate synthase, nonspecific, mitochondrial	ALAS1		25.2022	24.2557	24.767	22.9085	24.5075	24.9393	23.394	25.6293	25.4279
Q13740;Q13740-2	CD166 antigen	ALCAM		23.1426	23.9123	22.5026	23.018	24.4331	24.7358	23.5968	24.349	23.3955
Q8IZ83;Q8IZ83-3	Aldehyde dehydrogenase family 16 member A1	ALDH16A1		30.0308	29.9992	30.3531	30.1274	29.8446	29.9775	29.9325	29.7672	29.9548
P54886;P54886-2	Delta-1-pyrroline-5-carboxylate synthase;Glutamate 5-kinase;Gamma-glutamyl phosphate reductase	ALDH18A1		32.9028	32.8918	32.721	32.7558	32.6455	32.6128	32.9313	32.786	32.8072
O94788;O94788-4;O94788-3;O94788-2	Retinal dehydrogenase 2	ALDH1A2		24.8559	24.4716	25.636	25.4771	25.6819	25.886	25.0721	24.5153	24.7254
P47895	Aldehyde dehydrogenase family 1 member A3	ALDH1A3		28.3083	29.0568	28.5497	28.3574	28.3562	28.2659	28.3317	28.2265	28.0874
P30837	Aldehyde dehydrogenase X, mitochondrial	ALDH1B1		28.4229	28.736	28.4336	28.8003	29.1215	28.7262	28.4358	28.1156	27.9783
O75891;O75891-3;O75891-2;O75891-4	Cytosolic 10-formyltetrahydrofolate dehydrogenase	ALDH1L1		22.5436	25.7654	22.8769	NaN	25.1739	21.8146	24.7554	23.8253	23.4969
Q3SY69	Mitochondrial 10-formyltetrahydrofolate dehydrogenase	ALDH1L2		26.3367	27.6608	27.3281	23.8547	26.1856	25.4528	26.6424	27.2853	27.2513
P30838	Aldehyde dehydrogenase, dimeric NADP-preferring	ALDH3A1		22.4853	25.1945	25.7835	24.3711	25.4579	26.1182	23.1879	25.032	24.3351
P51648;P51648-2	Fatty aldehyde dehydrogenase	ALDH3A2		31.2784	31.2139	31.332	31.0416	31.0869	31.054	31.0132	31.0837	30.9599
P43353;P43353-2	Aldehyde dehydrogenase family 3 member B1	ALDH3B1		27.0635	28.2598	27.7875	28.0758	28.4292	27.6717	27.0817	28.0105	27.8277
P30038;P30038-2;P30038-3	Delta-1-pyrroline-5-carboxylate dehydrogenase, mitochondrial	ALDH4A1		27.8507	28.3437	28.2277	27.774	28.3289	28.0206	27.6355	28.0636	28.0188
P51649;P51649-2	Succinate-semialdehyde dehydrogenase, mitochondrial	ALDH5A1		29.3731	29.8356	29.8481	29.6742	29.8242	29.9599	29.7949	30.1444	29.8877
Q02252;Q02252-2	Methylmalonate-semialdehyde dehydrogenase [acylating], mitochondrial	ALDH6A1		28.9193	28.6534	28.5961	29.0681	28.6362	28.5794	28.5269	28.6286	28.6422
P49419-2;P49419;P49419-4	Alpha-aminoadipic semialdehyde dehydrogenase	ALDH7A1		31.9611	32.0509	31.9972	31.6897	31.9908	31.9857	32.1311	32.0397	32.0809
P49189;P49189-2	4-trimethylaminobutyraldehyde dehydrogenase	ALDH9A1		32.8691	32.8291	32.9591	32.984	33.113	32.9749	32.7514	32.7909	32.9103
P04075;P04075-2	Fructose-bisphosphate aldolase A	ALDOA		35.6888	35.6802	35.8167	35.7552	35.8515	35.8556	35.8845	35.8121	35.9206
P09972	Fructose-bisphosphate aldolase C	ALDOC		31.0461	30.8684	30.916	30.9998	30.946	31.0039	30.7026	30.9897	30.8146
Q9BT22;Q9BT22-2	Chitobiosyldiphosphodolichol beta-mannosyltransferase	ALG1		26.3934	27.1414	26.7103	26.9967	26.827	26.5544	26.6985	26.9288	26.9105
Q5BKT4;Q5I7T1	Dol-P-Glc:Glc(2)Man(9)GlcNAc(2)-PP-Dol alpha-1,2-glucosyltransferase;Putative Dol-P-Glc:Glc(2)Man(9)GlcNAc(2)-PP-Dol alpha-1,2-glucosyltransferase	ALG10;ALG10B		25.7864	26.0111	25.7494	25.5793	25.8707	24.4955	25.7549	25.8808	25.4791
Q2TAA5	GDP-Man:Man(3)GlcNAc(2)-PP-Dol alpha-1,2-mannosyltransferase	ALG11		25.9966	25.229	24.3735	25.2373	25.3348	25.7351	25.3567	25.8429	25.621
Q9NP73-2;Q9NP73	Putative bifunctional UDP-N-acetylglucosamine transferase and deubiquitinase ALG13	ALG13		27.2466	27.5884	27.474	27.5292	27.3693	26.6479	27.3507	28.7325	27.6583
Q96F25	UDP-N-acetylglucosamine transferase subunit ALG14 homolog	ALG14		23.9305	23.5328	24.3867	23.7696	24.5761	23.7196	22.9528	24.7159	23.7053
Q9H553;Q9H553-2	Alpha-1,3/1,6-mannosyltransferase ALG2	ALG2		28.06	28.1015	28.1517	28.0697	28.2135	27.9152	28.0732	27.8909	27.8347
Q92685;Q92685-2	Dol-P-Man:Man(5)GlcNAc(2)-PP-Dol alpha-1,3-mannosyltransferase	ALG3		24.2889	24.6751	24.728	24.2952	24.4511	23.9978	25.1527	25.0277	24.5621
Q9Y673;Q9Y673-2	Dolichyl-phosphate beta-glucosyltransferase	ALG5		28.0594	28.357	28.3943	27.7874	28.336	28.5272	28.2118	28.4146	28.5691
Q9Y672	Dolichyl pyrophosphate Man9GlcNAc2 alpha-1,3-glucosyltransferase	ALG6		28.2503	27.5962	27.79	27.4022	27.9114	27.7852	27.7468	27.9508	27.7315
Q9BVK2;Q9BVK2-2	Probable dolichyl pyrophosphate Glc1Man9GlcNAc2 alpha-1,3-glucosyltransferase	ALG8		27.8887	27.509	27.1619	27.6915	27.0802	27.1421	27.3375	27.2332	26.9176
Q9H6U8;Q9H6U8-3;Q9H6U8-2;Q9H6U8-4	Alpha-1,2-mannosyltransferase ALG9	ALG9		27.3229	26.8712	27.9146	27.8332	27.9004	28.1261	27.8041	27.4223	27.1146
Q13686	Alkylated DNA repair protein alkB homolog 1	ALKBH1		23.6714	22.9037	22.9919	23.9979	23.929	24.473	24.4134	24.0464	23.8714
Q6NS38;Q6NS38-2	Alpha-ketoglutarate-dependent dioxygenase alkB homolog 2	ALKBH2		26.6731	26.7046	26.4549	26.7078	26.782	27.2664	27.1654	27.1494	27.1597
Q96Q83	Alpha-ketoglutarate-dependent dioxygenase alkB homolog 3	ALKBH3		NaN	22.6636	22.9207	NaN	22.1462	22.9455	23.5469	22.8192	22.7761
Q9NXW9	Alpha-ketoglutarate-dependent dioxygenase alkB homolog 4	ALKBH4		25.8914	25.9615	26.1413	25.9098	25.9868	26.1987	25.9944	25.9008	26.1891
Q6P6C2;Q6P6C2-3;Q6P6C2-1	RNA demethylase ALKBH5	ALKBH5		27.3721	27.9014	27.6006	26.9172	27.8196	27.6195	27.912	27.581	27.8471
Q9BT30	Alpha-ketoglutarate-dependent dioxygenase alkB homolog 7, mitochondrial	ALKBH7		22.8551	23.3667	22.6111	22.6316	23.216	23.8398	22.1753	23.3467	23.9022
P09923	Intestinal-type alkaline phosphatase	ALPI		26.1912	26.2981	25.5724	25.9555	25.2701	27.6336	23.9717	23.6855	24.6029
P05186;P05186-3;P05186-2	Alkaline phosphatase, tissue-nonspecific isozyme	ALPL		28.8548	28.5684	28.2631	27.1225	26.7748	26.8931	29.1406	28.724	28.8289
P05187;P10696	Alkaline phosphatase, placental type;Alkaline phosphatase, placental-like	ALPP;ALPPL2		28.9459	28.8788	29.0471	28.5937	29.0275	28.8922	27.9956	28.2742	27.941
Q86V81	THO complex subunit 4	ALYREF		32.3346	32.4897	32.4716	32.3249	32.5837	32.6871	32.4009	32.6846	32.3341
Q9UHK6;Q9UHK6-5	Alpha-methylacyl-CoA racemase	AMACR		24.7826	24.7575	24.0868	24.9341	24.5775	24.639	25.4045	25.2281	25.1845
Q9C0C7;Q9C0C7-4;Q9C0C7-2;Q9C0C7-3;Q9C0C7-5	Activating molecule in BECN1-regulated autophagy protein 1	AMBRA1		24.1401	25.2052	24.2373	25.1952	24.9379	24.9405	24.409	24.0632	25.0102
P17707	S-adenosylmethionine decarboxylase proenzyme;S-adenosylmethionine decarboxylase alpha chain;S-adenosylmethionine decarboxylase beta chain	AMD1		24.5395	24.9646	25.5921	25.1748	24.1083	25.906	24.5204	25.7309	25.4223
Q9Y303;Q9Y303-2;Q9Y303-3	Putative N-acetylglucosamine-6-phosphate deacetylase	AMDHD2		27.0511	26.9538	28.3443	26.3571	27.2528	28.4751	26.2576	27.0517	26.1662
Q9UKV5	E3 ubiquitin-protein ligase AMFR	AMFR		27.1302	26.6813	26.4996	27.0689	26.696	26.4898	26.3702	26.4734	26.4032
Q9Y4X0;Q9Y4X0-4;Q9Y4X0-3	AMME syndrome candidate gene 1 protein	AMMECR1		22.8267	NaN	22.6456	22.2042	21.9653	21.7959	23.0852	NaN	22.3747
Q9Y2J4;Q9Y2J4-3;Q9Y2J4-2;Q9Y2J4-4	Angiomotin-like protein 2	AMOTL2		22.896	23.4875	NaN	22.1085	NaN	23.3607	22.9792	21.7736	24.1433
Q01433;Q01433-2;Q01433-5;Q01433-3;Q01433-4	AMP deaminase 2	AMPD2		30.839	30.9443	31.013	30.6516	30.5567	30.8856	30.6093	30.831	31.0307
Q9H1A4	Anaphase-promoting complex subunit 1	ANAPC1		29.4229	29.1203	28.9966	29.5229	29.1044	29.3534	29.2712	29.2844	29.2151
Q9UM13	Anaphase-promoting complex subunit 10	ANAPC10		25.69	26.4885	26.0226	25.7846	26.4243	25.8595	25.5177	26.5168	26.1582
Q9NYG5	Anaphase-promoting complex subunit 11	ANAPC11		23.1146	22.7296	23.1456	23.6057	22.9095	23.9306	23.6452	23.4563	23.1846
Q96DE5	Anaphase-promoting complex subunit 16	ANAPC16		26.0374	25.6741	25.8937	26.0337	25.5443	25.8759	25.7869	24.7135	25.8148
Q9UJX6;Q9UJX6-2	Anaphase-promoting complex subunit 2	ANAPC2		27.6778	28.0523	28.1093	27.9979	27.853	27.9772	28.0427	27.741	27.8281
Q9UJX5;Q9UJX5-3;Q9UJX5-2	Anaphase-promoting complex subunit 4	ANAPC4		28.3365	27.5977	27.5544	28.4693	27.9518	27.5276	28.1909	27.4804	27.5143
Q9UJX4	Anaphase-promoting complex subunit 5	ANAPC5		29.0922	29.1861	29.0326	28.9552	29.2132	29.0241	29.0944	29.1399	28.9017
Q9UJX3;Q9UJX3-2	Anaphase-promoting complex subunit 7	ANAPC7		30.3418	30.3227	30.2887	30.5801	30.5274	30.3863	30.5878	30.3984	30.3607
Q5VTE6;Q5VTE6-2	Protein angel homolog 2	ANGEL2		24.6711	25.8288	25.6413	24.8418	25.1322	24.8489	25.5148	24.7472	25.7038
Q9P2R3;Q9P2R3-2;Q9P2R3-4	Rabankyrin-5	ANKFY1		30.3563	30.3474	30.2569	30.4419	30.2506	30.2746	30.4699	30.4059	30.426
Q9HCJ1	Progressive ankylosis protein homolog	ANKH		23.2864	22.6678	23.0179	23.1298	22.6616	23.7	22.3899	21.387	23.041
Q8IWZ3-6	Ankyrin repeat and KH domain-containing protein 1	ANKHD1		29.2738	28.967	29.0969	29.3812	29.178	29.3413	29.5002	29.3706	29.6825
Q9P2G1	Ankyrin repeat and IBR domain-containing protein 1	ANKIB1		22.9729	22.6485	25.224	21.8065	23.3319	24.4453	23.1744	24.2482	24.8961
Q86XL3;Q86XL3-2	Ankyrin repeat and LEM domain-containing protein 2	ANKLE2		29.4133	29.7261	29.9719	29.3936	29.6347	29.5314	29.6736	29.5183	29.8094
Q8IV38	Ankyrin repeat and MYND domain-containing protein 2	ANKMY2		28.991	28.9594	29.0753	28.1369	28.2218	28.4451	28.4145	28.8792	29.0326
Q9NXR5	Ankyrin repeat domain-containing protein 10	ANKRD10		24.4013	22.0574	23.0261	23.1094	NaN	22.9016	23.5069	22.8103	23.7566
Q6UB99	Ankyrin repeat domain-containing protein 11	ANKRD11		27.9001	27.9794	27.1224	27.5921	28.113	27.5199	27.6869	26.6161	27.4409
Q8IZ07	Ankyrin repeat domain-containing protein 13A	ANKRD13A		24.9683	25.1532	25.447	25.2023	25.3276	25.7652	25.1995	24.9862	25.7321
Q8N6S4;Q8N6S4-2	Ankyrin repeat domain-containing protein 13C	ANKRD13C		22.0478	22.3133	21.716	21.1538	22.0782	21.2297	19.7134	22.7868	21.4202
Q6P6B7;Q6P6B7-2	Ankyrin repeat domain-containing protein 16	ANKRD16		25.3987	25.5145	25.1874	24.4904	22.5017	24.3659	25.2854	25.0174	25.2524
O75179;O75179-2;O75179-7;O75179-6;O75179-4	Ankyrin repeat domain-containing protein 17	ANKRD17		30.7766	30.586	30.6044	30.7115	30.6043	30.5768	30.5479	30.5594	30.6164
Q9GZV1;Q9GZV1-2	Ankyrin repeat domain-containing protein 2	ANKRD2		25.3379	26.2885	26.0963	25.4614	26.1216	26.6531	24.6425	26.4535	26.3156
Q5CZ79;Q5CZ79-2	Ankyrin repeat domain-containing protein 20B	ANKRD20A8P		26.5229	26.7928	26.4924	28.6165	26.9797	24.3739	26.8763	26.8564	23.6704
Q96NW4	Ankyrin repeat domain-containing protein 27	ANKRD27		26.0141	27.456	25.6353	24.7787	26.1937	26.2411	24.8618	25.5323	26.105
O15084;O15084-1;O15084-4;O15084-2	Serine/threonine-protein phosphatase 6 regulatory ankyrin repeat subunit A	ANKRD28		29.3452	29.4299	29.5626	29.225	29.0525	29.538	29.1648	29.3795	29.2244
Q9BQI6	Ankyrin repeat domain-containing protein 32	ANKRD32		26.606	26.7598	27.0474	25.6069	26.5232	27.084	26.7719	26.7675	26.4367
Q8N283	Ankyrin repeat domain-containing protein 35	ANKRD35		29.7575	28.8576	29.2656	29.797	28.8094	28.6304	29.956	29.0197	28.6508
Q53RE8	Ankyrin repeat domain-containing protein 39	ANKRD39		25.4154	23.7453	25.7426	25.3725	23.4537	25.1224	24.9624	23.6133	24.8644
Q6AI12	Ankyrin repeat domain-containing protein 40	ANKRD40		24.9959	23.345	22.722	24.8694	NaN	NaN	24.4908	24.0766	NaN
Q8N8A2;Q8N8A2-4;Q8N8A2-2;Q8N8A2-3	Serine/threonine-protein phosphatase 6 regulatory ankyrin repeat subunit B	ANKRD44		24.5914	25.7714	24.9796	23.8957	24.6644	25.1743	25.0212	25.2959	25.6293
Q86W74;Q86W74-2	Ankyrin repeat domain-containing protein 46	ANKRD46		22.6487	22.5545	23.4351	23.5767	22.3188	23.1493	23.2486	23.4606	23.5414
Q8WVL7	Ankyrin repeat domain-containing protein 49	ANKRD49		23.7829	NaN	NaN	23.4158	22.1129	22.5938	22.7379	NaN	22.103
Q9ULJ7;Q9ULJ7-2	Ankyrin repeat domain-containing protein 50	ANKRD50		21.7456	23.3716	23.0138	22.3364	22.0129	23.7364	21.8177	23.1206	24.3471
Q8NB46	Serine/threonine-protein phosphatase 6 regulatory ankyrin repeat subunit C	ANKRD52		28.1515	28.1079	28.5502	27.6983	28.1688	28.4271	27.8795	28.0964	28.2453
Q6NXT1;Q6NXT1-2	Ankyrin repeat domain-containing protein 54	ANKRD54		27.26	26.7578	26.6166	27.1713	26.9372	26.82	27.0017	27.0582	26.6129
Q92625;Q92625-2	Ankyrin repeat and SAM domain-containing protein 1A	ANKS1A		26.7048	26.7925	27.0693	27.0371	26.7893	27.13	26.7022	27.4507	26.7233
Q9H8Y5	Ankyrin repeat and zinc finger domain-containing protein 1	ANKZF1		28.7242	28.36	28.5778	28.7358	28.0926	28.454	28.7131	28.4509	28.5493
Q9NQW6;Q9NQW6-2	Actin-binding protein anillin	ANLN		30.2486	29.9737	30.0855	30.1511	29.8026	29.8313	30.1146	29.9983	29.7668
Q9NW15;Q9NW15-2;Q9NW15-3;Q9NW15-5	Anoctamin-10	ANO10		27.6338	27.6561	27.5678	27.6559	27.2589	28.028	27.2841	26.9867	27.9587
Q75V66	Anoctamin-5	ANO5		23.8074	24.7709	24.9931	24.4358	24.928	25.2607	25.1995	25.0792	25.0047
Q4KMQ2;Q4KMQ2-3;Q4KMQ2-2;Q4KMQ2-4	Anoctamin-6	ANO6		27.9329	28.2876	28.1216	28.0285	28.0245	27.7933	28.0836	27.9885	28.1905
P39687	Acidic leucine-rich nuclear phosphoprotein 32 family member A	ANP32A		32.7911	33.0743	32.9869	32.7965	32.9047	33.1406	32.9851	32.9661	32.9509
Q92688;Q92688-2	Acidic leucine-rich nuclear phosphoprotein 32 family member B	ANP32B		32.9915	32.6292	32.5651	32.7858	32.6734	32.8216	32.6473	32.586	32.8692
Q9BTT0;Q9BTT0-3;Q9BTT0-2	Acidic leucine-rich nuclear phosphoprotein 32 family member E	ANP32E		30.294	30.3853	30.4492	30.1476	30.8751	30.4213	29.8597	30.5486	30.7231
Q9H6X2;Q9H6X2-5;Q9H6X2-4;Q9H6X2-6;Q9H6X2-2;Q9H6X2-3	Anthrax toxin receptor 1	ANTXR1		28.1501	27.8219	28.5227	28.0927	28.1259	28.2724	28.2616	28.2182	28.3281
P04083	Annexin A1	ANXA1		33.8855	33.7979	33.9401	33.8444	33.9257	33.9326	33.9448	33.9809	34.0493
P50995;P50995-2	Annexin A11	ANXA11		31.6603	31.7863	31.8946	31.6764	31.487	31.413	31.4705	31.7702	31.9653
P07355;P07355-2;A6NMY6	Annexin A2;Putative annexin A2-like protein	ANXA2;ANXA2P2		35.9935	35.9454	35.9902	35.9821	35.9945	35.9691	36.0046	36.0043	35.9533
P12429	Annexin A3	ANXA3		32.1796	31.944	31.9453	32.276	32.176	32.1723	32.25	31.8536	32.2489
P09525;P09525-2	Annexin A4	ANXA4		31.565	31.4761	31.833	31.6801	31.8566	31.5591	31.4288	31.5914	31.4699
P08758	Annexin A5	ANXA5		33.9641	33.8472	34.1822	34.0727	34.05	34.0614	33.9825	33.8555	34.1051
P08133;P08133-2	Annexin A6	ANXA6		32.9635	33.1888	33.2947	33.0143	33.2218	33.1591	33.0374	33.1953	33.1635
P20073;P20073-2	Annexin A7	ANXA7		31.4617	31.5486	31.6141	31.6465	31.7425	31.4755	31.7395	31.6297	31.409
Q5VT79;P13928;P13928-3;Q5VT79-2	Annexin A8-like protein 2;Annexin A8	ANXA8L2;ANXA8		30.1052	30.0334	30.2329	29.4704	29.6514	29.6439	29.3797	28.9872	29.4838
Q63HQ0;Q63HQ0-2	AP-1 complex-associated regulatory protein	AP1AR		22.8972	24.1702	24.1731	22.8493	22.4192	24.1334	23.9274	24.0273	22.5053
Q10567;Q10567-2	AP-1 complex subunit beta-1	AP1B1		33.0261	32.9815	33.035	33.0353	32.8883	32.8782	33.0052	32.9829	32.8939
Q10567-3;Q10567-4	AP-1 complex subunit beta-1	AP1B1		27.1003	27.7069	27.8593	27.7161	28.0707	27.5595	28.1721	27.6987	28.0023
O43747;O43747-2	AP-1 complex subunit gamma-1	AP1G1		31.1672	30.8477	30.9163	31.1285	30.7378	30.894	30.9142	30.976	31.1953
O75843	AP-1 complex subunit gamma-like 2	AP1G2		28.0182	26.7274	27.8774	27.0576	26.87	26.8163	26.9725	27.3984	26.4792
Q9BXS5;Q9BXS5-2	AP-1 complex subunit mu-1	AP1M1		31.0602	31.0898	30.7132	30.701	31.3804	31.2178	30.6521	30.8024	31.2146
P61966;P61966-2	AP-1 complex subunit sigma-1A	AP1S1		28.4387	28.5657	28.4769	28.8214	28.8341	29.0627	28.605	28.6695	29.0488
P56377;P56377-2	AP-1 complex subunit sigma-2	AP1S2		24.7602	24.5056	24.1737	24.2994	23.6276	24.6622	24.9849	23.9775	24.475
Q96PC3;Q96PC3-4;Q96PC3-3;Q96PC3-2	AP-1 complex subunit sigma-3	AP1S3		23.0157	24.8295	24.6031	25.156	24.4624	24.5254	24.4731	24.4295	25.1961
O95782;O95782-2	AP-2 complex subunit alpha-1	AP2A1		31.8334	31.78	31.5843	31.8675	31.6103	31.5185	31.6404	31.7131	31.6597
O94973-2;O94973-3	AP-2 complex subunit alpha-2	AP2A2		29.7274	29.886	29.7116	29.4135	29.8526	29.795	29.423	29.7859	29.757
O94973	AP-2 complex subunit alpha-2	AP2A2		25.571	25.6552	25.8682	24.4148	25.4465	24.8641	25.7569	25.7278	25.7865
P63010;P63010-2;P63010-3	AP-2 complex subunit beta	AP2B1		31.9454	31.8397	31.99	32.104	31.8938	31.8268	32.0139	31.8377	31.7951
Q96CW1;Q96CW1-2	AP-2 complex subunit mu	AP2M1		31.2854	31.5074	31.7102	31.1588	31.3203	31.3809	31.4747	31.5413	31.4485
P53680;P53680-2	AP-2 complex subunit sigma	AP2S1		28.8089	28.9933	28.3226	28.5837	28.828	27.5858	28.6698	28.1957	28.6505
O00203;O00203-3	AP-3 complex subunit beta-1	AP3B1		31.4814	31.2945	31.4777	31.5755	31.2391	31.4651	31.3984	31.2585	31.2624
O14617-5;O14617;O14617-4;O14617-2;O14617-3	AP-3 complex subunit delta-1	AP3D1		31.0252	31.037	31.2851	31.0753	31.206	31.2619	31.1417	31.204	31.3172
Q9Y2T2	AP-3 complex subunit mu-1	AP3M1		30.1146	29.6452	29.9091	30.1622	29.9001	30.0899	30.0626	29.8509	29.9126
Q92572	AP-3 complex subunit sigma-1	AP3S1		26.7667	27.7168	27.3637	28.101	28.9326	27.1795	28.0251	28.0014	28.0532
Q9Y6B7;Q9Y6B7-2	AP-4 complex subunit beta-1	AP4B1		24.6228	25.1654	22.6194	24.5042	25.0219	24.4213	24.8363	24.5996	24.2931
Q9UPM8;Q9UPM8-2	AP-4 complex subunit epsilon-1	AP4E1		26.2145	26.3541	26.3605	25.9909	24.6614	26.0986	26.3216	25.9136	26.0164
O00189	AP-4 complex subunit mu-1	AP4M1		22.2976	22.0551	24.3306	24.414	NaN	24.5869	23.3495	24.4567	24.0161
Q9Y587-2;Q9Y587;Q9Y587-3;Q9Y587-4	AP-4 complex subunit sigma-1	AP4S1		NaN	23.3419	23.4176	23.3096	23.5895	22.7191	NaN	23.1757	23.5632
O43299;O43299-2	AP-5 complex subunit zeta-1	AP5Z1		24.8217	25.0185	25.3163	NaN	NaN	NaN	NaN	NaN	NaN
O14727;O14727-4;O14727-5;O14727-3;O14727-2	Apoptotic protease-activating factor 1	APAF1		27.1181	26.7417	28.6593	27.4075	27.2853	27.4244	27.3143	27.6484	26.9403
P25054;P25054-2	Adenomatous polyposis coli protein	APC		25.5603	25.4969	24.703	27.4819	25.6457	24.9524	27.8183	25.748	25.5275
P13798	Acylamino-acid-releasing enzyme	APEH		30.9733	31.1705	31.2916	30.9298	31.0877	30.9707	30.8016	31.0234	31.268
P27695	DNA-(apurinic or apyrimidinic site) lyase;DNA-(apurinic or apyrimidinic site) lyase, mitochondrial	APEX1		32.7533	33.046	33.0286	32.9224	33.1046	32.9167	33.0962	33.0606	32.869
Q9UBZ4	DNA-(apurinic or apyrimidinic site) lyase 2	APEX2		24.7395	25.323	26.2425	24.9175	24.4656	25.6162	24.8297	24.9368	25.7879
Q96BI3;Q96BI3-2	Gamma-secretase subunit APH-1A	APH1A		25.3615	24.8629	25.2125	25.6522	25.3045	25.5431	25.0588	24.9134	24.9745
Q9BZZ5-2;Q9BZZ5-5	Apoptosis inhibitor 5	API5		32.2681	32.2542	32.51	32.1996	32.1587	32.3194	32.5084	32.1862	32.3656
Q9BZZ5;Q9BZZ5-6;Q9BZZ5-3;Q9BZZ5-1	Apoptosis inhibitor 5	API5		22.265	23.6458	24.5398	22.6749	23.7183	25.3951	NaN	25.4021	24.5746
Q96GX9;Q96GX9-3	Methylthioribulose-1-phosphate dehydratase	APIP		29.758	29.1962	29.6788	29.5824	29.0855	29.7136	29.3736	29.3352	29.7772
Q8N2Z9;Q8N2Z9-2	Centromere protein S	APITD1		24.7598	24.3509	25.5496	24.4201	25.385	25.2487	25.6484	25.3782	25.292
Q06481;Q06481-3;Q06481-6;Q06481-2;Q06481-4;Q06481-5	Amyloid-like protein 2	APLP2		28.5274	28.4386	27.8599	28.3936	28.6233	28.0572	28.2787	28.5691	28.3434
Q9HDC9;Q9HDC9-2	Adipocyte plasma membrane-associated protein	APMAP		29.9268	29.7337	29.9257	29.7994	29.7177	30.0302	29.9079	29.9072	29.7634
Q8NCW5;Q8NCW5-2	NAD(P)H-hydrate epimerase	APOA1BP		30.9034	31.0727	31.0565	30.744	30.8601	30.8175	30.5175	30.7591	30.7205
Q9UH17;Q9UH17-3	DNA dC->dU-editing enzyme APOBEC-3B	APOBEC3B		27.8642	27.453	27.4895	27.8577	27.9155	27.6946	27.3022	27.2156	27.3868
Q9NRW3	DNA dC->dU-editing enzyme APOBEC-3C	APOBEC3C		28.1618	28.0558	27.7335	28.2001	28.1429	27.3648	28.0795	27.9726	26.9792
Q9BQE5	Apolipoprotein L2	APOL2		28.0072	27.9292	28.0956	27.8482	28.3989	28.2311	28.0128	28.1091	28.3946
Q9BUR5;Q9BUR5-2	Apolipoprotein O	APOO		28.0248	28.6782	28.9578	28.6866	28.6933	28.8023	28.7012	29.022	28.7984
Q6UXV4	MICOS complex subunit MIC27	APOOL		26.4754	26.2836	25.3381	25.9644	26.3569	25.7043	26.2996	25.8757	26.2076
P05067;P05067-9;P05067-8;P05067-7;P05067-11;P05067-5;P05067-6;P05067-4;P05067-3;P05067-10	Amyloid beta A4 protein;N-APP;Soluble APP-alpha;Soluble APP-beta;C99;Beta-amyloid protein 42;Beta-amyloid protein 40;C83;P3(42);P3(40);C80;Gamma-secretase C-terminal fragment 59;Gamma-secretase C-terminal fragment 57;Gamma-secretase C-terminal fragment 50;C31	APP		28.0617	28.0383	28.2874	28.6653	28.4792	28.1902	27.6298	27.4804	27.6044
Q92624	Amyloid protein-binding protein 2	APPBP2		25.5152	23.9597	22.9825	24.5155	23.0149	NaN	24.7716	25.0039	24.462
Q9UKG1	DCC-interacting protein 13-alpha	APPL1		29.4471	29.5327	29.1185	29.5421	29.6493	29.5908	29.6543	29.4037	29.1054
Q8NEU8;Q8NEU8-2;Q8NEU8-3	DCC-interacting protein 13-beta	APPL2		27.3955	27.2465	27.2708	26.9396	27.3624	26.7409	27.3787	27.5929	27.5217
P07741;P07741-2	Adenine phosphoribosyltransferase	APRT		32.0881	31.8435	31.9191	31.8294	32.1596	32.263	31.5585	31.7358	31.7018
Q7Z2E3;Q7Z2E3-7;Q7Z2E3-4;Q7Z2E3-5;Q7Z2E3-10;Q7Z2E3-3;Q7Z2E3-8;Q7Z2E3-9;Q7Z2E3-11;Q7Z2E3-2	Aprataxin	APTX		27.8025	28.5941	28.3465	28.2101	28.7165	28.4537	28.0798	28.5606	28.6074
O60306	Intron-binding protein aquarius	AQR		30.3114	30.1863	30.4747	30.4022	30.0717	30.1338	30.5361	30.2124	30.3526
P10398	Serine/threonine-protein kinase A-Raf	ARAF		28.4285	28.7261	28.7103	28.8459	28.6838	28.7396	28.6961	28.6101	28.8038
Q96P48;Q96P48-3;Q96P48-1;Q96P48-2;Q96P48-4;Q96P48-7;Q96P48-5	Arf-GAP with Rho-GAP domain, ANK repeat and PH domain-containing protein 1	ARAP1		27.634	28.1192	28.2765	28.2784	28.2214	28.2579	27.478	27.998	28.3808
P48444;P48444-2	Coatomer subunit delta	ARCN1		32.1717	32.1352	32.2014	32.2801	32.1531	32.2508	32.275	32.1975	32.1801
P84077	ADP-ribosylation factor 1	ARF1		33.0089	33.0284	33.031	33.0266	33.0435	33.0594	32.9285	33.0337	33.0096
P61204;P61204-2	ADP-ribosylation factor 3	ARF3		26.7522	26.5381	26.4635	26.8177	26.1263	24.1495	26.974	26.4358	26.5348
P18085	ADP-ribosylation factor 4	ARF4		30.5537	30.9316	30.8612	30.839	30.6285	31.0547	30.6564	30.7426	30.9323
P84085	ADP-ribosylation factor 5	ARF5		28.8964	29.3692	29.3755	29.2182	29.3478	28.724	28.9629	29.4563	29.4497
P62330	ADP-ribosylation factor 6	ARF6		29.7157	29.9594	30.0718	29.6607	29.9266	29.9496	29.9678	30.0263	30.1369
Q8N6T3;Q8N6T3-5;Q8N6T3-2;Q8N6T3-4;Q8N6T3-3	ADP-ribosylation factor GTPase-activating protein 1	ARFGAP1		29.227	29.5223	29.5612	29.4339	29.522	29.5797	29.3711	29.7437	29.6392
Q8N6H7;Q8N6H7-2;Q8N6H7-3	ADP-ribosylation factor GTPase-activating protein 2	ARFGAP2		29.4004	29.6761	29.7212	29.6082	29.9103	29.5983	29.7048	29.7416	29.73
Q9NP61;Q9NP61-2	ADP-ribosylation factor GTPase-activating protein 3	ARFGAP3		27.3044	27.6643	27.1675	27.6531	27.4227	27.4713	26.4271	26.901	26.7416
Q9Y6D6	Brefeldin A-inhibited guanine nucleotide-exchange protein 1	ARFGEF1		27.7275	27.8474	28.1689	28.3944	28.4538	28.4538	28.3945	28.4579	28.4361
Q9Y6D5	Brefeldin A-inhibited guanine nucleotide-exchange protein 2	ARFGEF2		30.0421	30.2424	30.2408	30.2953	30.1346	30.1541	30.1735	29.9351	29.9568
P53367;P53367-3	Arfaptin-1	ARFIP1		29.5222	29.1432	29.2974	29.0288	29.158	29.4583	28.9979	29.4541	29.8093
P53367-2	Arfaptin-1	ARFIP1		25.8888	25.7953	26.7163	NaN	24.9784	26.0478	26.025	26.1417	26.6279
P53365;P53365-3;P53365-2	Arfaptin-2	ARFIP2		27.7121	27.0915	27.1451	27.4227	27.276	27.4524	27.3173	27.6248	27.2872
Q13795;Q13795-2;Q13795-3	ADP-ribosylation factor-related protein 1	ARFRP1		25.2303	24.3413	24.095	23.7984	24.1932	24.3386	23.9163	24.5237	24.359
Q9NWB6;Q9NWB6-2;Q9NWB6-3	Arginine and glutamate-rich protein 1	ARGLU1		30.2949	30.6406	30.8135	30.7054	30.0749	30.9471	30.8421	30.6849	30.3999
Q07960	Rho GTPase-activating protein 1	ARHGAP1		31.2887	31.2953	31.2087	31.345	30.9549	31.4394	31.0553	31.3965	31.3371
A1A4S6	Rho GTPase-activating protein 10	ARHGAP10		25.0216	25.0948	24.817	26.1521	25.8734	25.3929	25.9489	25.2793	24.717
Q6P4F7;Q6P4F7-3	Rho GTPase-activating protein 11A	ARHGAP11A		26.4154	26.7123	25.7064	26.1212	26.6121	26.4971	26.638	26.8207	26.342
Q8IWW6-3	Rho GTPase-activating protein 12	ARHGAP12		27.1237	27.5456	27.3246	27.3011	27.7158	27.4669	26.9236	27.3984	27.7363
Q68EM7;Q68EM7-6;Q68EM7-5;Q68EM7-2	Rho GTPase-activating protein 17	ARHGAP17		29.7514	29.835	29.9724	29.7794	29.8382	29.609	29.7148	29.6517	29.8193
Q8N392;Q8N392-2	Rho GTPase-activating protein 18	ARHGAP18		29.015	29.7617	29.3701	29.1773	29.3694	29.4273	29.0481	29.1327	29.6045
Q5T5U3;Q5T5U3-3	Rho GTPase-activating protein 21	ARHGAP21		28.1597	27.8496	28.4206	28.5151	28.4572	28.4514	28.3403	28.4084	28.6399
Q9P227;Q9P227-2	Rho GTPase-activating protein 23	ARHGAP23		23.1911	23.0097	22.2834	23.5104	21.3289	22.6935	23.4659	22.8363	22.5306
Q9UNA1;Q9UNA1-2	Rho GTPase-activating protein 26	ARHGAP26		23.5696	23.2075	22.0283	22.776	24.2293	25.7325	24.3698	26.0355	24.2132
Q52LW3	Rho GTPase-activating protein 29	ARHGAP29		23.5169	25.0254	23.9241	25.0405	24.7641	24.7651	24.9244	24.8914	24.7589
Q9NRY4	Rho GTPase-activating protein 35	ARHGAP35		29.1332	28.8891	29.1009	29.0611	28.8164	29.0642	29.1517	28.985	29.1465
Q9C0H5;Q9C0H5-2	Rho GTPase-activating protein 39	ARHGAP39		23.7291	19.1358	23.0508	23.8248	22.486	21.9619	23.6384	23.756	22.466
P98171;P98171-2	Rho GTPase-activating protein 4	ARHGAP4		24.6518	24.5641	25.1563	25.2306	25.0359	24.9602	25.3904	25.6677	24.0146
Q13017;Q13017-2	Rho GTPase-activating protein 5	ARHGAP5		26.4351	26.4741	26.8615	25.9363	26.6901	26.4511	26.0722	27.0036	26.8273
P52565;P52565-2	Rho GDP-dissociation inhibitor 1	ARHGDIA		32.5379	32.3944	32.6957	32.3912	32.7501	32.6224	32.1767	32.7406	32.7961
P52566	Rho GDP-dissociation inhibitor 2	ARHGDIB		29.6927	29.4032	29.0633	30.428	29.8833	29.8889	30.7894	30.4338	30.2855
Q92888;Q92888-3;Q92888-2;Q92888-4	Rho guanine nucleotide exchange factor 1	ARHGEF1		30.1814	30.0717	30.0687	30.1285	29.7147	30.026	30.0352	29.7556	29.9963
O15013;O15013-7;O15013-4;O15013-5;O15013-6	Rho guanine nucleotide exchange factor 10	ARHGEF10		28.8066	28.7684	28.5209	28.5115	28.4592	28.7284	28.6279	28.4979	28.7435
O15085-2;O15085	Rho guanine nucleotide exchange factor 11	ARHGEF11		25.9807	25.8517	23.9167	25.3565	NaN	25.1458	24.0939	24.2898	24.794
Q9NZN5;Q9NZN5-2	Rho guanine nucleotide exchange factor 12	ARHGEF12		27.7177	27.9391	28.2032	28.4004	28.3641	28.308	28.3052	28.5898	28.25
Q5VV41;Q5VV41-2	Rho guanine nucleotide exchange factor 16	ARHGEF16		28.7011	28.6532	28.31	29.1003	28.4724	28.2941	28.8599	28.5178	28.4571
Q96PE2	Rho guanine nucleotide exchange factor 17	ARHGEF17		24.3984	20.3534	21.9892	24.0823	20.7239	23.6574	24.2121	20.9157	24.8887
Q6ZSZ5;Q6ZSZ5-2	Rho guanine nucleotide exchange factor 18	ARHGEF18		28.3325	28.2024	27.5453	28.1481	29.0233	27.5501	27.5744	27.9567	28.2539
Q92974;Q92974-2;Q92974-3	Rho guanine nucleotide exchange factor 2	ARHGEF2		30.6713	30.5349	30.4628	30.4473	30.2716	30.5221	30.0925	30.1088	30.1905
Q8N1W1;Q8N1W1-5;Q8N1W1-4;Q8N1W1-3;Q8N1W1-6	Rho guanine nucleotide exchange factor 28	ARHGEF28		25.371	24.5695	23.7238	24.8623	24.2877	24.1404	24.5298	24.3317	24.8035
Q12774	Rho guanine nucleotide exchange factor 5	ARHGEF5		26.613	26.4629	26.3564	26.7496	25.7251	25.7616	26.3267	25.6724	26.0168
Q14155-1;Q14155-5;Q14155;Q14155-6;Q14155-2;Q14155-3	Rho guanine nucleotide exchange factor 7	ARHGEF7		29.5492	29.5497	29.2534	29.4366	29.2623	29.4089	29.4518	29.3835	29.4808
O14497;O14497-2;O14497-3	AT-rich interactive domain-containing protein 1A	ARID1A		29.3549	29.5637	29.4338	29.3668	29.7061	29.4868	29.5823	29.6593	29.2188
Q8NFD5;Q8NFD5-3;Q8NFD5-2;Q8NFD5-4	AT-rich interactive domain-containing protein 1B	ARID1B		27.5422	27.5009	27.5438	27.9502	27.6626	27.1443	27.798	27.4498	27.4105
Q68CP9;Q68CP9-3	AT-rich interactive domain-containing protein 2	ARID2		31.2762	31.4469	31.5029	31.2868	31.3619	31.6031	31.4485	31.333	31.1939
P29374;P29374-3;P29374-2	AT-rich interactive domain-containing protein 4A	ARID4A		25.5335	25.5347	24.804	25.4762	25.5625	24.9847	25.5958	26.0731	25.6057
Q4LE39;Q4LE39-2;Q4LE39-3;Q4LE39-4	AT-rich interactive domain-containing protein 4B	ARID4B		28.3902	28.9482	29.0883	28.6059	29.0139	29.1756	28.7268	28.9074	28.8749
Q14865;Q14865-2	AT-rich interactive domain-containing protein 5B	ARID5B		27.0331	27.5043	27.4216	27.7442	27.9567	27.9925	27.4666	27.6513	27.5658
Q9Y4X5	E3 ubiquitin-protein ligase ARIH1	ARIH1		29.9144	30.1076	29.9931	30.2885	30.0154	30.1156	30.0477	29.8808	30.0984
O95376	E3 ubiquitin-protein ligase ARIH2	ARIH2		27.4343	27.881	27.9468	27.7732	28.2128	27.8442	27.7582	27.6765	27.5494
P40616;P40616-2	ADP-ribosylation factor-like protein 1	ARL1		29.7306	29.6214	29.9785	29.9562	29.5144	29.4965	29.5307	29.6607	29.5528
Q3SXY8;Q3SXY8-2;Q3SXY8-3	ADP-ribosylation factor-like protein 13B	ARL13B		21.1479	23.2826	22.915	21.9326	22.5622	22.1418	23.0186	23.4469	22.9428
Q8N8R7	ARL14 effector protein	ARL14EP		23.6869	23.593	NaN	25.3247	25.0893	25.1908	25.964	24.8341	24.8431
Q9NXU5	ADP-ribosylation factor-like protein 15	ARL15		26.5476	26.6767	25.9047	25.7974	26.6451	26.0017	25.7147	26.2532	22.3768
P36404;P36404-2	ADP-ribosylation factor-like protein 2	ARL2		29.1738	28.5167	28.0649	28.8598	30.0806	29.9381	28.8157	30.0494	30.0625
Q9Y2Y0;Q9Y2Y0-2	ADP-ribosylation factor-like protein 2-binding protein	ARL2BP		27.0832	27.6009	27.3007	27.9743	27.7656	27.9927	27.999	27.9567	28.1453
P36405	ADP-ribosylation factor-like protein 3	ARL3		30.4154	30.3532	30.2737	30.3708	29.947	30.3103	30.4064	30.3719	30.6846
P49703	ADP-ribosylation factor-like protein 4D	ARL4D		21.4948	NaN	21.4357	NaN	21.1472	21.6025	21.2093	22.0604	21.6702
Q96KC2	ADP-ribosylation factor-like protein 5B	ARL5B		26.5239	24.0282	25.0855	25.6178	25.4655	25.3259	25.1824	24.3057	24.5256
Q9H0F7;Q9H0F7-2	ADP-ribosylation factor-like protein 6	ARL6		25.2014	25.2863	24.1789	25.2155	24.4889	24.3878	25.2014	24.4328	24.1199
Q15041;Q15041-3;Q15041-2	ADP-ribosylation factor-like protein 6-interacting protein 1	ARL6IP1		29.4443	30.0762	30.4791	30.3695	30.1289	30.4843	30.7516	30.2321	29.9595
Q66PJ3;Q66PJ3-3;Q66PJ3-7;Q66PJ3-4	ADP-ribosylation factor-like protein 6-interacting protein 4	ARL6IP4		29.2088	28.9111	28.995	29.1627	28.9569	29.0177	29.1101	28.7713	29.2027
Q66PJ3-2;Q66PJ3-5	ADP-ribosylation factor-like protein 6-interacting protein 4	ARL6IP4		25.1416	25.4137	23.1047	25.0628	25.4028	25.2764	25.2551	25.5544	24.5999
O75915	PRA1 family protein 3	ARL6IP5		28.3931	28.9659	28.3622	28.9274	28.5994	28.5947	28.9269	28.87	28.6093
Q8N6S5	ADP-ribosylation factor-like protein 6-interacting protein 6	ARL6IP6		23.0499	23.244	22.7939	22.8739	22.9721	24.7356	22.7021	23.6671	23.2899
Q96BM9	ADP-ribosylation factor-like protein 8A	ARL8A		28.5919	28.5006	28.7401	28.5384	28.2492	28.4924	28.5147	28.4552	28.727
Q9NVJ2	ADP-ribosylation factor-like protein 8B	ARL8B		28.5558	27.6499	28.0547	28.3964	27.5788	27.8681	28.5846	27.5523	27.0947
Q9NVT9	Armadillo repeat-containing protein 1	ARMC1		28.7198	28.6029	28.3741	28.583	28.299	27.7434	28.6349	28.8404	27.7938
Q8N2F6-2;Q8N2F6-4;Q8N2F6-6;Q8N2F6-5	Armadillo repeat-containing protein 10	ARMC10		27.1395	26.7331	27.5003	26.7266	26.4817	26.9592	26.5839	26.6935	26.8885
Q8N2F6;Q8N2F6-3	Armadillo repeat-containing protein 10	ARMC10		NaN	NaN	21.3143	22.1075	22.3612	21.5062	21.9851	NaN	NaN
Q96C12;Q96C12-4;Q96C12-2;Q96C12-3	Armadillo repeat-containing protein 5	ARMC5		24.3491	21.4409	22.7091	23.936	21.9429	29.8444	22.6655	22.559	21.934
Q6NXE6;Q6NXE6-2	Armadillo repeat-containing protein 6	ARMC6		29.5762	29.2196	29.7418	29.3515	29.1512	29.6886	29.1862	29.4387	29.6316
Q8IUR7;Q8IUR7-7;Q8IUR7-8;Q8IUR7-2;Q8IUR7-3;Q8IUR7-6	Armadillo repeat-containing protein 8	ARMC8		28.1454	28.5524	28.5193	28.5892	28.2966	28.5891	28.6385	28.2263	28.4352
Q7Z3E5;Q7Z3E5-2	LisH domain-containing protein ARMC9	ARMC9		24.2736	28.2627	27.3889	24.7657	24.645	23.9206	24.7243	27.8533	27.6027
Q9H993	Protein-glutamate O-methyltransferase	ARMT1		29.3875	29.4863	29.6403	29.3467	29.5024	29.6799	29.2795	29.6679	29.3197
P27540;P27540-2;P27540-3;P27540-4	Aryl hydrocarbon receptor nuclear translocator	ARNT		26.4728	26.4726	25.5485	26.0073	26.3379	25.9705	25.916	26.2054	26.29
O00327;O00327-8;O00327-9;O00327-1;O00327-7;O00327-6;O00327-4	Aryl hydrocarbon receptor nuclear translocator-like protein 1	ARNTL		23.2788	23.0646	24.1947	23.8829	24.5176	24.0057	23.4134	23.5922	23.8706
Q92747;Q92747-2	Actin-related protein 2/3 complex subunit 1A	ARPC1A		29.0318	29.2248	29.011	29.1397	28.7893	29.2897	29.5061	29.5499	29.8669
O15143	Actin-related protein 2/3 complex subunit 1B	ARPC1B		31.8696	32.038	32.1494	32.0511	32.1831	32.1592	32.0228	32.018	32.1567
O15144	Actin-related protein 2/3 complex subunit 2	ARPC2		31.6267	31.4402	31.5438	31.5635	31.4612	31.4076	31.7207	31.6526	31.5212
O15145	Actin-related protein 2/3 complex subunit 3	ARPC3		31.4294	31.5494	31.4113	31.5853	31.3397	31.3809	31.4989	31.4115	31.4306
P59998;P59998-3;P59998-2	Actin-related protein 2/3 complex subunit 4	ARPC4		31.4076	31.5706	31.6078	31.6112	31.4755	31.6328	31.6499	31.4262	31.6192
O15511;O15511-2	Actin-related protein 2/3 complex subunit 5	ARPC5		30.7618	31.1029	31.0554	30.7656	30.7476	30.7108	30.5715	30.9861	30.9388
Q9BPX5	Actin-related protein 2/3 complex subunit 5-like protein	ARPC5L		29.1408	29.5683	29.4104	29.2482	29.3163	28.7614	29.2505	29.3182	29.5267
Q7Z6K5-2;Q7Z6K5	Arpin	ARPIN		28.6443	28.8627	28.9436	27.8068	28.8633	28.8594	28.4364	28.8671	28.7697
P56211;P56211-2	cAMP-regulated phosphoprotein 19	ARPP19		27.838	27.7407	26.5729	28.4938	27.7271	28.0263	27.8486	27.6127	27.5604
P49407-2;P49407	Beta-arrestin-1	ARRB1		29.1248	29.3019	29.0964	28.9839	29.3485	29.2565	29.125	29.5488	29.1147
P32121;P32121-5;P32121-2;P32121-3;P32121-4	Beta-arrestin-2	ARRB2		27.071	27.1242	27.0431	27.1758	26.8756	26.9101	26.5635	26.3655	26.1572
Q8N5I2	Arrestin domain-containing protein 1	ARRDC1		25.4481	24.2508	24.7951	25.3765	25.2502	22.8789	24.8101	24.8085	24.3049
P15289-2;P15289	Arylsulfatase A;Arylsulfatase A component B;Arylsulfatase A component C	ARSA	1	23.8936	23.8515	23.5694	23.9226	24.1279	23.283	24.0435	24.2023	23.4978
P15848;P15848-2	Arylsulfatase B	ARSB	1	24.769	25.2666	24.6948	25.6119	25.815	25.6883	25.5352	25.8369	25.7349
Q9H2C2	Protein ARV1	ARV1		25.0457	24.518	25.7853	24.7651	24.6899	25.7829	24.923	24.874	25.6312
Q13510;Q13510-2;Q13510-3	Acid ceramidase;Acid ceramidase subunit alpha;Acid ceramidase subunit beta	ASAH1	1	26.9771	26.863	26.4971	27.0994	27.3744	26.9681	27.1814	26.6063	26.2104
Q9ULH1;Q9ULH1-2	Arf-GAP with SH3 domain, ANK repeat and PH domain-containing protein 1	ASAP1		26.0416	26.0522	25.6891	25.8947	26.3328	25.8102	25.517	26.0723	25.3083
O43150;O43150-2	Arf-GAP with SH3 domain, ANK repeat and PH domain-containing protein 2	ASAP2		26.0082	26.8525	26.9963	26.208	26.2	26.4463	26.3016	26.5868	26.697
Q8TDY4;Q8TDY4-3	Arf-GAP with SH3 domain, ANK repeat and PH domain-containing protein 3	ASAP3		22.2256	23.5008	22.9747	21.9184	22.5161	NaN	NaN	22.5102	23.2769
Q9NWX5	Ankyrin repeat and SOCS box protein 6	ASB6		25.7384	24.4306	26.1107	26.0648	25.0725	25.6827	25.9186	24.626	25.8898
Q96DX5;Q96DX5-2;Q96DX5-3	Ankyrin repeat and SOCS box protein 9	ASB9		27.1661	27.1038	26.4213	27.4852	27.0918	27.0999	26.2346	27.9616	27.5228
Q8N9N2-2;Q8N9N2	Activating signal cointegrator 1 complex subunit 1	ASCC1		27.5008	27.4652	27.6091	27.8766	28.015	27.6284	27.7362	27.6972	27.7854
Q9H1I8;Q9H1I8-3	Activating signal cointegrator 1 complex subunit 2	ASCC2		26.5003	26.4058	26.8094	27.0444	26.9802	27.0837	26.9734	26.7153	26.6752
Q8N3C0	Activating signal cointegrator 1 complex subunit 3	ASCC3		29.609	29.6959	29.5301	29.7066	29.5103	29.5722	29.5784	29.5114	29.6567
Q9Y294	Histone chaperone ASF1A	ASF1A		27.7039	28.0385	26.8125	27.5127	28.1732	27.2693	27.8567	27.8963	28.422
Q9NVP2	Histone chaperone ASF1B	ASF1B		27.6614	27.0234	26.8313	27.7289	27.0066	27.3336	27.7294	27.3956	27.0595
Q9NR48-2;Q9NR48	Histone-lysine N-methyltransferase ASH1L	ASH1L		26.2457	26.8804	26.3761	26.3588	26.6951	25.9712	26.105	26.2189	26.406
Q9UBL3;Q9UBL3-3;Q9UBL3-2	Set1/Ash2 histone methyltransferase complex subunit ASH2	ASH2L		29.0707	29.5035	29.0872	29.2688	29.3338	29.3164	29.3396	29.4277	29.0471
P04424;P04424-3;P04424-2	Argininosuccinate lyase	ASL		25.7958	26.0912	26.8924	26.1793	26.2482	26.5017	23.8278	25.4609	25.4899
O95671;O95671-2;O95671-3	N-acetylserotonin O-methyltransferase-like protein	ASMTL		29.1415	29.4268	29.0693	29.3374	29.3184	29.544	29.2726	29.2559	29.77
O43681	ATPase ASNA1	ASNA1		31.2423	31.3008	30.8598	31.3572	31.257	30.982	31.0854	31.2754	30.9495
P08243;P08243-2;P08243-3	Asparagine synthetase [glutamine-hydrolyzing]	ASNS		33.6868	33.2407	33.4352	33.1984	32.5662	33.2134	33.1239	32.6284	33.126
Q12797;Q12797-10	Aspartyl/asparaginyl beta-hydroxylase	ASPH		32.0274	32.2688	32.2883	32.0659	32.0197	31.8852	32.0538	31.9606	32.069
Q8IZT6;Q8IZT6-2	Abnormal spindle-like microcephaly-associated protein	ASPM		26.8063	26.9154	26.7048	26.7465	26.3249	26.712	26.7745	26.6469	26.6867
Q9BZE9-2;Q9BZE9;Q9BZE9-3	Tether containing UBX domain for GLUT4	ASPSCR1		26.5978	26.3197	26.0437	26.047	25.0399	25.4837	25.7434	26.4249	25.9671
Q7L266;Q7L266-2	Isoaspartyl peptidase/L-asparaginase;Isoaspartyl peptidase/L-asparaginase alpha chain;Isoaspartyl peptidase/L-asparaginase beta chain	ASRGL1		27.2249	26.9176	28.8007	25.896	28.7073	28.8495	26.2458	27.0122	26.6637
P00966	Argininosuccinate synthase	ASS1		35.3753	35.2695	35.4333	35.5117	35.4681	35.6314	35.2484	35.1926	35.5889
Q2TB18;Q2TB18-2	Protein asteroid homolog 1	ASTE1		22.8412	25.2989	22.5359	22.6913	25.6136	22.3639	23.0444	20.5562	22.5515
Q9NVM9;Q9NVM9-2	Protein asunder homolog	ASUN		30.1266	30.1413	30.1578	30.3759	30.4003	30.2734	30.5342	30.359	30.2234
Q8IXJ9;Q8IXJ9-2	Putative Polycomb group protein ASXL1	ASXL1		22.762	23.0523	25.2968	24.6862	22.5639	22.7558	24.5097	23.7559	NaN
Q76L83;Q76L83-2	Putative Polycomb group protein ASXL2	ASXL2		24.6651	25.6352	25.5396	25.4781	25.7519	25.7415	25.6752	25.6865	25.3759
Q8NBU5;Q8NBU5-2	ATPase family AAA domain-containing protein 1	ATAD1		31.001	30.6698	30.625	30.6207	30.3879	30.1819	30.5417	30.6879	30.4551
Q6PL18	ATPase family AAA domain-containing protein 2	ATAD2		31.004	30.8492	31.0232	31.1403	30.935	30.6056	31.2588	30.8647	30.9803
Q9ULI0;Q9ULI0-2	ATPase family AAA domain-containing protein 2B	ATAD2B		25.8693	25.9483	25.7586	26.3133	26.6233	25.8273	26.4946	26.502	26.1983
Q9NVI7-2;Q9NVI7;Q9NVI7-3	ATPase family AAA domain-containing protein 3A	ATAD3A		31.8286	31.9424	31.7574	31.9308	31.7033	31.8719	31.9174	31.9647	31.77
Q5T9A4;Q5T9A4-3	ATPase family AAA domain-containing protein 3B	ATAD3B		28.3309	27.7506	27.1736	28.3748	28.0189	27.5002	28.2547	27.7087	26.9643
Q96QE3;Q96QE3-2	ATPase family AAA domain-containing protein 5	ATAD5		28.047	28.386	28.3347	28.0576	28.5699	28.8119	28.2213	28.4931	28.1746
O95260-2;O95260	Arginyl-tRNA--protein transferase 1	ATE1		27.6043	26.8108	27.4669	27.1215	26.6078	27.0892	27.0419	26.0692	27.0495
P18846;P18846-2	Cyclic AMP-dependent transcription factor ATF-1	ATF1		29.7171	29.4399	29.2167	29.996	29.6242	30.1349	30.3846	29.3782	29.9306
P15336-5;P15336;P15336-7;P15336-3;P15336-4	Cyclic AMP-dependent transcription factor ATF-2	ATF2		26.5908	26.6816	26.8013	26.7414	26.8284	26.995	26.9621	26.8814	26.7466
P18847;P18847-5	Cyclic AMP-dependent transcription factor ATF-3	ATF3		24.2869	24.682	23.1515	22.7913	24.5764	22.7377	23.5164	23.3022	NaN
P18848	Cyclic AMP-dependent transcription factor ATF-4	ATF4		21.6941	21.9933	22.676	NaN	NaN	NaN	NaN	NaN	NaN
P18850	Cyclic AMP-dependent transcription factor ATF-6 alpha;Processed cyclic AMP-dependent transcription factor ATF-6 alpha	ATF6		24.8527	25.1379	24.9305	24.8145	25.2947	25.8558	24.3752	24.9317	24.8864
Q99941;Q99941-2	Cyclic AMP-dependent transcription factor ATF-6 beta;Processed cyclic AMP-dependent transcription factor ATF-6 beta	ATF6B		24.6903	23.0397	20.41	23.5607	24.7661	23.8869	NaN	NaN	24.0968
P17544-2;P17544-4;P17544-6;P17544;P17544-3	Cyclic AMP-dependent transcription factor ATF-7	ATF7		28.4192	28.2745	28.4911	28.6042	28.7025	28.6493	28.8308	28.5773	27.8256
Q6VMQ6;Q6VMQ6-2;Q6VMQ6-5;Q6VMQ6-4	Activating transcription factor 7-interacting protein 1	ATF7IP		25.8448	25.6252	24.98	26.5234	25.3312	26.8415	25.2141	25.3503	27.9451
Q9BSB4	Autophagy-related protein 101	ATG101		24.5381	23.0811	22.4753	24.6859	22.9897	23.0986	23.4259	NaN	24.043
O94817	Ubiquitin-like protein ATG12	ATG12		26.6652	26.1789	26.408	25.7722	26.4393	25.8952	25.9246	25.8981	25.6499
O75143;O75143-3;O75143-2;O75143-5;O75143-4	Autophagy-related protein 13	ATG13		NaN	24.698	24.9611	23.7978	24.7499	24.1237	24.732	24.8338	25.517
Q676U5;Q676U5-2;Q676U5-5;Q676U5-3;Q676U5-4	Autophagy-related protein 16-1	ATG16L1		28.2056	28.7907	28.4188	28.5124	28.636	28.2628	28.3995	28.1811	28.2934
Q2TAZ0;Q2TAZ0-3	Autophagy-related protein 2 homolog A	ATG2A		22.4663	23.8936	24.6193	22.3108	NaN	24.3834	22.436	23.1668	24.0273
Q96BY7	Autophagy-related protein 2 homolog B	ATG2B		24.9013	25.3464	25.6164	24.7918	25.9386	25.6011	24.8517	25.2932	25.0254
Q9NT62;Q9NT62-2	Ubiquitin-like-conjugating enzyme ATG3	ATG3		30.2244	30.1143	29.5224	30.4629	29.7866	29.9185	30.2541	29.9171	29.9157
Q9Y4P1;Q9Y4P1-6;Q9Y4P1-2;Q9Y4P1-4	Cysteine protease ATG4B	ATG4B		26.5978	27.4113	27.2311	27.1211	26.9624	27.5087	27.0557	27.605	27.6725
Q96DT6	Cysteine protease ATG4C	ATG4C		23.8148	25.3161	25.0306	24.7833	23.308	24.4894	25.6124	25.4575	25.8919
Q9H1Y0;Q9H1Y0-2	Autophagy protein 5	ATG5		27.2476	27.282	26.9551	27.1145	27.093	27.2327	27.0359	27.1632	26.251
O95352;O95352-2;O95352-3	Ubiquitin-like modifier-activating enzyme ATG7	ATG7		28.6974	29.1103	28.9388	28.9512	28.3983	29.014	29.1144	29.1479	28.9592
Q7Z3C6;Q7Z3C6-2	Autophagy-related protein 9A	ATG9A		27.4877	27.2958	27.2274	26.7986	26.9841	27.3372	27.1142	27.1258	27.6177
P31939;P31939-2	Bifunctional purine biosynthesis protein PURH;Phosphoribosylaminoimidazolecarboxamide formyltransferase;IMP cyclohydrolase	ATIC		33.4406	33.3778	33.5714	33.5257	33.3489	33.2852	33.4404	33.3907	33.3998
Q8NHH9;Q8NHH9-5;Q8NHH9-4;Q8NHH9-2;Q8NHH9-3	Atlastin-2	ATL2		29.7006	29.4208	29.5353	29.7458	29.4366	29.385	29.6295	29.3718	29.6582
Q6DD88	Atlastin-3	ATL3		31.9665	31.7823	31.8208	31.9497	31.7828	31.9993	31.8688	31.7664	32.0304
Q13315	Serine-protein kinase ATM	ATM		28.7579	28.7316	29.2658	28.8325	28.6815	28.6743	30.0109	28.8126	28.5996
P54259	Atrophin-1	ATN1		27.8382	27.2905	27.7159	27.6543	27.6223	27.5215	27.6384	27.816	27.4847
O00244	Copper transport protein ATOX1	ATOX1		29.7184	29.7096	29.4928	30.136	29.6503	30.2103	30.0626	30.0653	30.1357
P98196	Probable phospholipid-transporting ATPase IH	ATP11A		27.0666	27.4044	27.531	27.3284	27.1341	26.7817	27.4464	28.011	27.7374
Q9Y2G3	Probable phospholipid-transporting ATPase IF	ATP11B		24.2373	21.6513	24.6568	23.8481	22.7632	24.6785	23.9609	23.8925	22.2906
Q8NB49;Q8NB49-2;Q8NB49-3;Q8NB49-4	Phospholipid-transporting ATPase IG	ATP11C		28.2258	28.3512	28.3231	28.2354	28.0688	28.7438	27.9342	28.3018	28.5955
Q9HD20;Q9HD20-2	Manganese-transporting ATPase 13A1	ATP13A1		30.3934	30.6311	30.5118	30.2917	30.6064	30.1078	30.215	29.9545	30.0797
Q9NQ11;Q9NQ11-3;Q9NQ11-2	Probable cation-transporting ATPase 13A2	ATP13A2		23.6653	22.6751	22.7682	22.7933	22.7121	23.0169	22.5458	22.687	22.7868
Q9H7F0;Q9H7F0-2	Probable cation-transporting ATPase 13A3	ATP13A3		26.7796	26.8921	26.3831	27.0475	27.3598	26.7105	26.4163	26.7248	26.397
P05023;P05023-4;P05023-3;P05023-2	Sodium/potassium-transporting ATPase subunit alpha-1	ATP1A1		34.3401	34.2372	34.3146	34.2829	34.2059	34.2539	34.3921	34.3175	34.3281
P50993	Sodium/potassium-transporting ATPase subunit alpha-2	ATP1A2		24.4002	24.9909	24.0002	25.3947	27.5358	21.9352	25.1915	27.2405	22.8596
P05026;P05026-2	Sodium/potassium-transporting ATPase subunit beta-1	ATP1B1		31.2123	30.9701	31.1241	31.2565	30.7965	31.1208	31.2069	30.9583	31.1266
P54709;P54709-2	Sodium/potassium-transporting ATPase subunit beta-3	ATP1B3		31.9697	31.929	31.5857	31.9163	31.9774	31.9774	32.1647	32.1622	31.7445
P16615;P16615-5;P16615-2;P16615-3;P16615-4	Sarcoplasmic/endoplasmic reticulum calcium ATPase 2	ATP2A2		32.7653	33.0102	33.0224	32.9795	33.0614	32.924	33.026	33.0425	32.8306
P20020;P20020-6;P20020-3;P20020-4;P20020-5;P20020-2	Plasma membrane calcium-transporting ATPase 1	ATP2B1		31.677	31.9035	31.6795	31.8418	31.9675	31.9367	31.9784	31.9535	31.8385
Q16720;Q16720-2;Q16720-8;Q16720-7;Q16720-6;Q16720-3;Q16720-5;Q16720-4;Q01814-2;Q01814-4;Q01814-7;Q01814-3	Plasma membrane calcium-transporting ATPase 3	ATP2B3		27.5562	27.4519	27.7545	28.2037	28.0074	28.3788	28.3826	27.7993	26.7599
P23634;P23634-6;P23634-7;P23634-8;P23634-2;P23634-5;P23634-4;P23634-3	Plasma membrane calcium-transporting ATPase 4	ATP2B4		28.299	28.1897	27.7296	27.9732	28.1522	27.2448	28.0322	27.8426	27.7116
P98194-8;P98194-7;P98194-5;P98194-9;P98194-6	Calcium-transporting ATPase type 2C member 1	ATP2C1		29.1995	29.3294	29.2804	29.0916	29.3182	29.3825	29.1632	29.298	29.1984
P98194;P98194-2	Calcium-transporting ATPase type 2C member 1	ATP2C1		NaN	NaN	NaN	23.0849	22.6984	23.0138	22.8473	NaN	23.2092
P25705;P25705-2;P25705-3	ATP synthase subunit alpha, mitochondrial	ATP5A1		34.7678	34.7423	34.7138	34.5651	34.6831	34.6761	34.5711	34.7159	34.7316
P06576	ATP synthase subunit beta, mitochondrial	ATP5B		34.9616	35.0037	34.9388	34.8134	34.8461	34.9255	34.9308	35.0173	35.0239
P36542;P36542-2	ATP synthase subunit gamma, mitochondrial	ATP5C1		32.2084	32.3952	32.1935	32.2768	32.2365	32.2383	32.4334	32.4972	32.3071
P30049	ATP synthase subunit delta, mitochondrial	ATP5D		29.5254	28.554	29.8292	29.3706	29.5646	29.7063	28.864	29.5403	30.11
P56381;Q5VTU8	ATP synthase subunit epsilon, mitochondrial;ATP synthase subunit epsilon-like protein, mitochondrial	ATP5E;ATP5EP2		29.9628	30.206	30.3694	30.4834	29.4607	30.3883	30.3656	29.7361	30.3773
P24539	ATP synthase F(0) complex subunit B1, mitochondrial	ATP5F1		32.3991	32.1089	32.2343	32.3605	31.9785	32.1747	32.1806	32.3175	32.1424
O75947;O75947-2	ATP synthase subunit d, mitochondrial	ATP5H		31.6569	32.1136	32.2724	31.8108	32.1808	32.2854	31.7509	32.3076	32.3707
P56385	ATP synthase subunit e, mitochondrial	ATP5I		30.0971	29.9779	29.9642	29.6053	30.119	30.1418	29.5894	30.2712	30.2033
P18859;P18859-2	ATP synthase-coupling factor 6, mitochondrial	ATP5J		30.4052	30.479	30.676	30.481	30.6088	30.3363	30.3395	30.6005	30.7722
P56134;P56134-3	ATP synthase subunit f, mitochondrial	ATP5J2		29.004	29.0369	28.6121	28.5323	28.8812	28.3166	28.6594	28.9418	28.4628
O75964	ATP synthase subunit g, mitochondrial	ATP5L		31.5717	31.5696	31.7342	31.8238	31.7107	31.6986	31.6314	31.621	31.3979
P48047	ATP synthase subunit O, mitochondrial	ATP5O		31.9286	31.8613	31.9597	32.0618	31.6415	32.0669	31.8012	31.8653	32.0218
Q99766	ATP synthase subunit s, mitochondrial	ATP5S		25.7306	26.3534	26.0413	26.157	26.272	26.74	25.5282	26.3647	26.6498
Q9NW81;Q9NW81-4;Q9NW81-6;Q9NW81-3;Q9NW81-5	ATP synthase subunit s-like protein	ATP5SL		27.0778	27.0347	26.9429	26.9011	26.8767	26.9385	26.928	27.1657	27.2422
Q15904	V-type proton ATPase subunit S1	ATP6AP1		28.9352	28.8067	28.6485	28.9968	28.8103	28.6089	28.8522	28.48	28.5351
O75787;O75787-2	Renin receptor	ATP6AP2		27.2604	27.0742	27.3699	27.5175	27.0908	28.4753	27.2489	26.8928	28.1412
Q93050-3;Q93050;Q93050-1	V-type proton ATPase 116 kDa subunit a isoform 1	ATP6V0A1		29.6694	29.805	29.3718	29.761	29.935	29.6448	29.6781	29.8528	29.6048
Q9Y487	V-type proton ATPase 116 kDa subunit a isoform 2	ATP6V0A2		26.9065	26.0451	26.1528	26.4388	25.5218	25.5825	26.3998	25.8683	25.8146
Q9HBG4	V-type proton ATPase 116 kDa subunit a isoform 4	ATP6V0A4		26.109	25.5043	24.743	26.9432	25.8082	25.1873	27.4657	25.3552	25.5247
P27449	V-type proton ATPase 16 kDa proteolipid subunit	ATP6V0C		27.9769	27.7694	28.0417	27.9135	27.0601	28.2721	27.8428	27.3517	28.164
P61421	V-type proton ATPase subunit d 1	ATP6V0D1		29.7087	29.8273	29.334	29.7231	29.6505	29.5098	29.7439	29.423	29.2596
P38606;P38606-2	V-type proton ATPase catalytic subunit A	ATP6V1A		31.0589	31.3205	31.3106	31.133	31.1152	31.3466	30.9655	31.3966	31.2037
P21281	V-type proton ATPase subunit B, brain isoform	ATP6V1B2		30.3942	30.4212	30.3276	30.4556	30.2462	30.3222	30.2613	30.2908	30.1328
P21283	V-type proton ATPase subunit C 1	ATP6V1C1		30.3256	29.9539	30.0401	30.3918	30.157	30.0655	30.2344	29.9002	30.1775
Q9Y5K8	V-type proton ATPase subunit D	ATP6V1D		27.1005	26.7328	27.6677	26.9269	27.1935	27.0721	26.978	27.174	27.628
P36543;P36543-3;P36543-2	V-type proton ATPase subunit E 1	ATP6V1E1		29.2295	29.0288	29.367	28.6701	29.2377	28.7714	28.3137	29.1879	28.719
Q16864;Q16864-2	V-type proton ATPase subunit F	ATP6V1F		27.4422	27.7629	27.6597	27.7716	28.1472	27.438	27.7239	27.5309	27.2949
O75348	V-type proton ATPase subunit G 1	ATP6V1G1		28.5964	28.8806	28.9105	28.7433	28.9496	28.9921	28.6659	28.9066	29.1447
Q9UI12;Q9UI12-2	V-type proton ATPase subunit H	ATP6V1H		29.4016	29.2886	29.5046	29.4735	29.2039	29.474	29.3553	29.3265	29.4199
Q04656;Q04656-5;Q04656-2;Q04656-3;Q04656-4	Copper-transporting ATPase 1	ATP7A		23.407	21.8288	20.915	23.6012	22.2837	21.2951	23.7113	23.326	23.0755
P35670-2;P35670;P35670-4;P35670-3	Copper-transporting ATPase 2;WND/140 kDa	ATP7B		25.0653	25.2767	24.5586	24.706	25.0386	24.9473	24.3228	24.4532	24.0454
O75110;O75110-2	Probable phospholipid-transporting ATPase IIA	ATP9A		26.4103	26.4246	26.1983	26.8219	26.4193	26.6081	26.2819	26.7815	27.0026
Q5TC12;Q5TC12-2	ATP synthase mitochondrial F1 complex assembly factor 1	ATPAF1		28.9683	28.2692	28.2292	28.6798	28.521	28.2233	28.9239	28.6702	28.0998
Q8N5M1	ATP synthase mitochondrial F1 complex assembly factor 2	ATPAF2		26.0919	25.8803	25.2347	26.1675	26.4801	25.156	26.017	25.8039	26.1106
Q9UII2;Q9UII2-3;Q9UII2-2	ATPase inhibitor, mitochondrial	ATPIF1		31.8799	31.9179	31.7024	31.7368	32.1049	31.4201	32.0816	32.1961	31.8472
Q13535;Q13535-2;Q13535-3	Serine/threonine-protein kinase ATR	ATR		28.0811	28.4466	28.5633	28.2184	28.5189	28.3401	28.3509	28.5847	28.5581
Q6UW56;Q6UW56-3;Q6UW56-2	All-trans retinoic acid-induced differentiation factor	ATRAID		25.4861	25.0216	25.2322	25.3977	25.3312	25.715	25.3948	25.665	24.6399
Q8WXE1;Q8WXE1-2;Q8WXE1-3;Q8WXE1-5	ATR-interacting protein	ATRIP		28.5934	29.1499	31.1427	28.4532	30.0492	31.2539	29.1166	29.0382	31.0265
O75882;O75882-3;O75882-2	Attractin	ATRN		24.9751	25.1551	23.8402	25.1048	25.5469	24.8747	25.2538	25.3226	24.0415
P46100;P46100-4;P46100-3;P46100-5;P46100-2;P46100-6	Transcriptional regulator ATRX	ATRX		29.3974	29.5113	29.5933	29.1557	29.3467	29.4102	29.6321	29.7636	29.4371
P54253	Ataxin-1	ATXN1		22.849	23.1143	21.8615	23.0124	23.4799	22.7421	23.8695	23.1332	22.2769
Q9UBB4;Q9UBB4-2	Ataxin-10	ATXN10		32.7799	33.3792	33.3433	32.8838	32.9615	33.3159	32.8437	33.0672	33.4251
P0C7T5	Ataxin-1-like	ATXN1L		24.4634	24.4352	26.5854	24.6419	24.9318	26.823	24.8462	24.4527	28.0281
Q99700;Q99700-2;Q99700-4;Q99700-5	Ataxin-2	ATXN2		29.8554	29.9056	29.4619	29.8034	29.9271	29.6802	29.5224	29.8731	29.7665
Q8WWM7;Q8WWM7-6;Q8WWM7-8;Q8WWM7-5;Q8WWM7-4;Q8WWM7-2;Q8WWM7-3	Ataxin-2-like protein	ATXN2L		31.5729	31.542	31.6493	31.5235	31.6182	31.7317	31.6253	31.5798	31.752
Q8WWM7-9	Ataxin-2-like protein	ATXN2L		24.2692	NaN	21.9514	22.9961	22.1112	22.8167	23.265	22.5263	22.7974
P54252;P54252-2;P54252-4;P54252-3	Ataxin-3	ATXN3		24.9391	25.1122	26.1398	25.4017	26.2383	26.0958	26.648	26.1233	25.785
Q14CW9;Q14CW9-2	Ataxin-7-like protein 3	ATXN7L3		24.5101	22.6346	22.8657	22.2279	22.4121	22.9053	NaN	22.4923	22.9531
Q13825;Q13825-2	Methylglutaconyl-CoA hydratase, mitochondrial	AUH		26.2278	25.8082	25.6924	24.7089	26.0598	25.6704	26.2289	25.9564	26.379
Q9Y679;Q9Y679-2;Q9Y679-3	Ancient ubiquitous protein 1	AUP1		30.0709	29.7286	29.58	29.706	29.8205	29.8492	29.6689	29.8397	29.3164
O14965	Aurora kinase A	AURKA		28.7958	28.6259	28.3571	28.8979	28.9342	28.4668	28.8822	28.6475	28.3258
Q9NWT8	Aurora kinase A-interacting protein	AURKAIP1		24.4614	25.4993	25.7513	25.4688	24.3889	25.2276	25.303	24.4453	25.6147
Q96GD4;Q96GD4-5;Q96GD4-4;Q96GD4-2;Q96GD4-3	Aurora kinase B	AURKB		29.0594	28.7253	28.5233	28.6756	28.84	28.3748	28.9749	29.0107	28.6681
Q9NQS1	Cell death regulator Aven	AVEN		27.7368	27.2222	27.2775	27.2774	27.695	27.4064	27.0183	27.7882	27.3222
Q8NBF6;Q8NBF6-2	Late secretory pathway protein AVL9 homolog	AVL9		27.0687	27.2784	27.6781	26.7343	27.3284	27.5875	27.166	27.2056	27.4178
O15169;O15169-2	Axin-1	AXIN1		23.5964	23.9773	23.7802	23.405	24.3736	23.8261	24.3707	24.2629	23.5582
P30530;P30530-2	Tyrosine-protein kinase receptor UFO	AXL		27.2892	27.3776	27.3061	26.8332	26.7328	27.0338	26.6805	26.9653	27.2305
Q9H6S1;Q9H6S1-3;Q9H6S1-5;Q9H6S1-4	5-azacytidine-induced protein 2	AZI2		NaN	NaN	25.4778	NaN	NaN	22.5761	22.643	21.8419	25.6012
P61769	Beta-2-microglobulin;Beta-2-microglobulin form pI 5.3	B2M		32.3265	32.0199	31.8717	31.8049	31.7929	31.7149	31.7269	31.7376	31.5617
Q8NCR0;Q8NCR0-2	UDP-GalNAc:beta-1,3-N-acetylgalactosaminyltransferase 2	B3GALNT2		22.1948	23.4512	NaN	NaN	23.3738	21.7362	22.6546	23.0085	21.9516
Q6Y288	Beta-1,3-glucosyltransferase	B3GALTL		26.1137	26.6094	26.5678	26.6721	26.6799	26.2228	26.8514	26.6927	26.7062
O94766;O94766-2	Galactosylgalactosylxylosylprotein 3-beta-glucuronosyltransferase 3	B3GAT3		25.9913	26.0823	26.0184	26.2885	25.8772	25.5831	25.4164	25.9214	25.7135
P15291;P15291-2	Beta-1,4-galactosyltransferase 1;Lactose synthase A protein;N-acetyllactosamine synthase;Beta-N-acetylglucosaminylglycopeptide beta-1,4-galactosyltransferase;Beta-N-acetylglucosaminyl-glycolipid beta-1,4-galactosyltransferase;Processed beta-1,4-galactosyltransferase 1	B4GALT1		27.7457	28.0365	27.7209	28.3055	28.054	27.8955	27.4632	28.2512	27.9125
O60513	Beta-1,4-galactosyltransferase 4;N-acetyllactosamine synthase;Lactotriaosylceramide beta-1,4-galactosyltransferase	B4GALT4		24.5177	24.5024	24.66	24.4399	24.767	25.2455	23.9445	24.9304	24.2582
O43286	Beta-1,4-galactosyltransferase 5	B4GALT5		26.3429	26.4116	25.8278	26.261	26.4251	25.5717	26.1818	26.0214	24.9245
O43505	Beta-1,4-glucuronyltransferase 1	B4GAT1		25.1959	24.728	22.5693	24.0058	24.915	24.9139	23.9405	24.7667	23.661
Q9NWV8;Q9NWV8-3	BRISC and BRCA1-A complex member 1	BABAM1		28.1263	28.405	28.2199	28.3207	27.8331	27.869	27.9724	27.8046	27.7797
Q9Y5Z0;Q9Y5Z0-3;Q9Y5Z0-2;Q9Y5Z0-5;Q9Y5Z0-4	Beta-secretase 2	BACE2		25.635	24.4063	24.353	25.9989	24.8614	25.5929	25.6372	25.0027	24.4039
Q92934	Bcl2-associated agonist of cell death	BAD		25.7098	25.869	25.175	24.6925	25.4737	25.2204	26.1703	26.1714	25.7354
Q99933;Q99933-4;Q99933-3;Q99933-2	BAG family molecular chaperone regulator 1	BAG1		29.6555	29.7124	29.0895	29.7549	29.3897	29.7427	29.7787	29.4192	29.9644
O95816;O95816-2	BAG family molecular chaperone regulator 2	BAG2		32.3458	32.417	32.1635	32.4257	32.3616	32.1317	32.2261	32.1952	32.1838
O95817	BAG family molecular chaperone regulator 3	BAG3		30.9844	30.8631	30.9985	31.1783	30.9418	30.8852	30.988	31.0969	31.1368
O95429;O95429-2	BAG family molecular chaperone regulator 4	BAG4		24.4145	24.1235	24.6811	24.8563	24.9324	24.9646	24.4	24.3891	24.7009
Q9UL15	BAG family molecular chaperone regulator 5	BAG5		27.7317	27.6294	27.9533	27.6717	27.9014	28.3125	27.2384	27.178	27.9102
P46379;P46379-2;P46379-3;P46379-5;P46379-4	Large proline-rich protein BAG6	BAG6		30.9278	30.785	30.7129	30.7762	30.3524	30.5113	30.694	30.8262	30.7808
Q8TBE0;Q8TBE0-3;Q8TBE0-2	Bromo adjacent homology domain-containing 1 protein	BAHD1		25.4579	24.8132	25.4016	25.9602	23.9354	25.4729	25.5787	25.2671	26.1178
Q9UQB8-5;Q9UQB8;Q9UQB8-4;Q9UQB8-3;Q9UQB8-2;Q9UQB8-6	Brain-specific angiogenesis inhibitor 1-associated protein 2	BAIAP2		29.4841	29.31	29.348	29.2125	29.3008	29.372	29.5033	29.4296	29.6026
Q9UHR4	Brain-specific angiogenesis inhibitor 1-associated protein 2-like protein 1	BAIAP2L1		30.832	30.9695	30.8899	30.7662	31.1638	31.0059	30.5799	30.8136	30.9346
Q16611;Q16611-2	Bcl-2 homologous antagonist/killer	BAK1		24.5973	25.7786	25.0519	23.9814	25.9321	25.2645	25.8818	26.0163	25.2492
O75531	Barrier-to-autointegration factor;Barrier-to-autointegration factor, N-terminally processed	BANF1		32.5901	32.4853	32.5844	32.3752	32.4924	32.4013	32.5696	32.7085	32.7881
Q8N9N5;Q8N9N5-4;Q8N9N5-5;Q8N9N5-7;Q8N9N5-6;Q8N9N5-2	Protein BANP	BANP		26.9147	26.4274	25.2659	26.8131	26.427	25.814	26.6182	29.2115	26.3597
Q92560	Ubiquitin carboxyl-terminal hydrolase BAP1	BAP1		25.2325	25.2878	25.5894	24.7098	25.874	25.3079	25.1014	25.1407	25.225
Q8IXM2;Q8IXM2-3	Chromatin complexes subunit BAP18	BAP18		28.4126	27.1935	26.7511	27.3979	27.5529	28.0966	27.5647	27.5522	27.6225
Q8IXM2-2	Chromatin complexes subunit BAP18	BAP18		22.8669	22.0927	23.0839	23.364	23.0169	23.8558	23.213	23.6672	22.4365
Q99728;Q99728-2;Q99728-3	BRCA1-associated RING domain protein 1	BARD1		25.1381	25.2691	26.0604	25.3102	25.9151	26.0011	25.1307	25.8974	25.5203
P80723;P80723-2	Brain acid soluble protein 1	BASP1		34.6493	34.7785	34.6245	34.815	34.7049	34.6892	34.682	34.8683	34.6585
Q07812;Q07812-5;Q07812-8;Q07812-2;Q07812-7	Apoptosis regulator BAX	BAX		28.5725	28.1958	28.3033	28.3855	28.2027	28.5849	28.2289	28.32	28.7286
Q9NRL2;Q9NRL2-2	Bromodomain adjacent to zinc finger domain protein 1A	BAZ1A		30.0635	29.9498	30.1001	29.8984	30.1748	30.6905	30.1131	30.519	29.9646
Q9UIG0;Q9UIG0-2	Tyrosine-protein kinase BAZ1B	BAZ1B		32.4163	32.7946	32.456	32.5117	32.6396	32.4341	32.5889	32.479	32.3065
Q9UIF9;Q9UIF9-2;Q9UIF9-3	Bromodomain adjacent to zinc finger domain protein 2A	BAZ2A		28.268	28.6956	28.23	28.8199	28.6032	28.2868	28.7389	28.6903	28.5896
Q9UIF8;Q9UIF8-4;Q9UIF8-2;Q9UIF8-5;Q9UIF8-3	Bromodomain adjacent to zinc finger domain protein 2B	BAZ2B		22.2003	24.59	20.9356	23.8004	24.526	22.9688	23.7969	23.4005	23.8096
Q8WY36;Q8WY36-2	HMG box transcription factor BBX	BBX		27.3066	28.2156	28.1358	28.2488	28.5734	29.0304	28.6441	28.7039	28.5898
P50895	Basal cell adhesion molecule	BCAM		28.3447	28.969	28.9485	28.3577	28.9508	29.2135	27.9666	28.9045	28.8435
Q9UHQ4;Q9UHQ4-2	B-cell receptor-associated protein 29	BCAP29		27.907	28.0898	27.3421	28.173	27.8926	27.7229	28.2097	28.2314	27.7553
P51572-2;P51572	B-cell receptor-associated protein 31	BCAP31		32.4585	32.4478	32.4693	32.4486	32.3666	32.3013	32.3912	32.5681	32.5247
P56945;P56945-3;P56945-8;P56945-7;P56945-5;P56945-2;P56945-6;P56945-4	Breast cancer anti-estrogen resistance protein 1	BCAR1		29.3228	29.0583	29.3254	29.3089	28.7807	29.2194	29.3311	29.1291	29.3197
O75815;O75815-3;O75815-2	Breast cancer anti-estrogen resistance protein 3	BCAR3		28.69	27.9164	27.9627	28.6268	27.9049	27.8618	28.8262	28.309	28.3754
O75934	Pre-mRNA-splicing factor SPF27	BCAS2		30.9745	30.8937	30.685	31.1836	30.8209	31.0986	31.2364	31.2171	30.8271
Q9H6U6;Q9H6U6-2;Q9H6U6-7;Q9H6U6-3;Q9H6U6-8;Q9H6U6-6	Breast carcinoma-amplified sequence 3	BCAS3		26.3331	26.0637	26.5823	26.5182	26.3841	26.3152	27.1445	26.3977	26.6803
O15382;O15382-2	Branched-chain-amino-acid aminotransferase, mitochondrial	BCAT2		28.5484	28.1353	28.5283	28.4136	28.5846	28.6589	28.449	28.1583	28.1222
Q9P287;Q9P287-3;Q9P287-4	BRCA2 and CDKN1A-interacting protein	BCCIP		31.3093	31.6833	31.2876	31.2628	31.3149	31.7145	31.3319	31.6545	31.2344
Q7Z5W3	Pre-miRNA 5-monophosphate methyltransferase	BCDIN3D		NaN	23.1967	23.3005	22.7605	21.9664	23.0615	NaN	22.6275	23.233
P12694;P12694-2	2-oxoisovalerate dehydrogenase subunit alpha, mitochondrial	BCKDHA		29.7023	29.889	29.8116	29.7102	29.8608	29.834	29.5555	29.6862	29.7591
P21953	2-oxoisovalerate dehydrogenase subunit beta, mitochondrial	BCKDHB		27.0124	27.7817	27.6186	27.2542	27.7875	27.5724	27.6376	27.444	27.076
O14874;O14874-2;O14874-3	[3-methyl-2-oxobutanoate dehydrogenase [lipoamide]] kinase, mitochondrial	BCKDK		26.5428	26.3198	26.1946	26.7667	26.6608	26.5946	25.9292	26.8487	26.4241
O95999	B-cell lymphoma/leukemia 10	BCL10		28.3916	28.2524	28.0296	27.8946	28.1736	28.3571	27.9267	28.0949	28.3618
Q07817;Q07817-2;Q07817-3	Bcl-2-like protein 1	BCL2L1		25.3502	25.2345	25.3811	24.1516	24.7475	24.5352	24.5196	25.2992	25.3369
O43521;O43521-4;O43521-8;O43521-12;O43521-3;O43521-2;O43521-6;O43521-9;O43521-7;O43521-5;O43521-11;O43521-10;O43521-14;O43521-19	Bcl-2-like protein 11	BCL2L11		20.063	21.3981	NaN	22.4988	20.0826	22.1643	NaN	22.6185	21.7624
Q9HB09;Q9HB09-3	Bcl-2-like protein 12	BCL2L12		24.3425	25.0163	24.6259	24.0597	25.2909	25.2559	23.896	25.5846	24.5021
Q9BXK5;Q9BXK5-4	Bcl-2-like protein 13	BCL2L13		28.3786	28.4263	28.0618	28.1607	28.4234	28.0786	27.5195	28.1829	28.3877
P41182;P41182-2	B-cell lymphoma 6 protein	BCL6		25.1182	24.686	NaN	24.7702	24.0789	24.1169	25.0954	24.3959	24.0497
Q4VC05-2	B-cell CLL/lymphoma 7 protein family member A	BCL7A		27.882	27.7858	27.7992	28.0643	27.9721	27.6858	28.0134	27.8835	27.977
Q9BQE9;Q9BQE9-4;Q9BQE9-3	B-cell CLL/lymphoma 7 protein family member B	BCL7B		25.8552	26.4537	26.3091	26.2792	26.7407	26.6124	26.0342	25.4419	26.0182
Q8WUZ0;Q8WUZ0-2	B-cell CLL/lymphoma 7 protein family member C	BCL7C		27.2974	27.811	27.2408	27.5067	27.723	27.9386	27.8867	27.9052	27.513
O00512	B-cell CLL/lymphoma 9 protein	BCL9		23.7953	26.7495	24.4529	23.9878	24.1928	24.8064	25.1913	23.9656	25.2353
Q86UU0;Q86UU0-4;Q86UU0-2	B-cell CLL/lymphoma 9-like protein	BCL9L		27.795	27.9418	28.0554	27.8609	28.4267	28.1991	28.0266	28.2338	28.0124
Q9NYF8;Q9NYF8-2;Q9NYF8-4	Bcl-2-associated transcription factor 1	BCLAF1		32.3066	32.4677	32.4224	32.3913	32.4883	32.6132	32.7322	32.4514	32.3858
Q9NYF8-3	Bcl-2-associated transcription factor 1	BCLAF1		27.7272	27.4917	27.6799	27.3068	27.3678	27.5283	27.5808	27.3785	27.3464
Q6W2J9;Q6W2J9-4;Q6W2J9-2;Q6W2J9-3	BCL-6 corepressor	BCOR		29.002	28.8082	28.8678	29.0859	29.2493	29.0977	29.4637	29.2319	29.1432
Q5H9F3-3;Q5H9F3;Q5H9F3-2	BCL-6 corepressor-like protein 1	BCORL1		24.5393	25.3829	25.0894	25.0974	25.5036	25.2399	25.0559	25.496	25.9447
P11274;P11274-2	Breakpoint cluster region protein	BCR		25.0909	26.5019	25.6549	25.4236	25.3457	26.2025	24.8417	25.7317	26.0112
Q9Y276	Mitochondrial chaperone BCS1	BCS1L		28.0174	28.3277	28.386	28.4578	28.21	27.9311	28.0573	28.3328	27.9188
Q9BUT1;Q9BUT1-3;Q9BUT1-2	3-hydroxybutyrate dehydrogenase type 2	BDH2		27.7623	27.7111	32.2608	28.2218	28.4129	28.1241	27.8697	27.9355	28.2196
Q14457	Beclin-1	BECN1		25.7781	25.025	25.4511	25.4433	24.2323	25.2308	25.5064	24.4525	25.6826
Q9BUH8	Brain-enriched guanylate kinase-associated protein	BEGAIN		24.5014	25.2873	23.1392	22.0687	24.7969	22.0432	21.5569	24.5557	21.5209
Q5T5X7	BEN domain-containing protein 3	BEND3		27.6496	27.2174	26.9557	27.6457	27.3308	26.3757	27.5197	26.7704	27.3657
O15155;O15155-2	BET1 homolog	BET1		25.8808	26.1114	27.0469	25.7449	24.0796	27.6007	26.1736	25.6068	27.5224
Q9NYM9	BET1-like protein	BET1L		24.0194	25.3686	21.9696	25.7529	25.0234	24.0139	24.987	25.6893	24.7716
P21810	Biglycan	BGN		20.6409	21.2727	20.2599	NaN	NaN	NaN	NaN	NaN	NaN
Q9H694;Q9H694-2	Protein bicaudal C homolog 1	BICC1		22.0817	21.3645	22.016	21.1497	21.2786	NaN	21.4546	NaN	NaN
Q96G01;Q96G01-4;Q96G01-3	Protein bicaudal D homolog 1	BICD1		24.9295	24.6819	25.2821	25.5575	24.4163	25.244	25.5625	25.7098	25.0624
Q8TD16;Q8TD16-2	Protein bicaudal D homolog 2	BICD2		29.3453	29.2003	29.3638	29.6333	29.702	29.342	29.5242	29.1675	29.5336
P55957;P55957-2;P55957-4	BH3-interacting domain death agonist;BH3-interacting domain death agonist p15;BH3-interacting domain death agonist p13;BH3-interacting domain death agonist p11	BID		28.2113	28.6254	28.5348	28.17	27.9574	28.1809	27.7713	27.9879	28.1115
O00499;O00499-2;O00499-6;O00499-3;O00499-5;O00499-9;O00499-7;O00499-4;O00499-11;O00499-10;O00499-8	Myc box-dependent-interacting protein 1	BIN1		30.8006	31.1401	31.0268	30.9596	30.7143	30.9174	30.8099	31.034	30.8736
Q9NQY0;Q9NQY0-2	Bridging integrator 3	BIN3		25.4513	25.1139	25.0283	26.1775	25.9371	26.1133	26.0035	26.2315	25.8493
Q13490;Q13490-2	Baculoviral IAP repeat-containing protein 2	BIRC2		25.9012	26.1791	25.6524	26.1877	26.0177	25.0873	25.7782	25.7759	24.9432
O15392;O15392-2;O15392-5;O15392-4	Baculoviral IAP repeat-containing protein 5	BIRC5		27.0099	26.1525	26.3524	26.912	25.8041	26.4596	26.571	26.4017	26.1972
Q9NR09	Baculoviral IAP repeat-containing protein 6	BIRC6		29.7347	30.0123	30.0874	29.8795	29.8065	29.9828	29.7466	29.9457	30.013
P54132	Bloom syndrome protein	BLM		29.3826	29.5021	29.5203	29.5295	29.6545	29.4901	29.8655	29.5705	29.6576
Q13867	Bleomycin hydrolase	BLMH		30.9321	31.094	31.1339	31.166	31.2813	31.3251	30.9926	31.3725	31.2187
P78537;P78537-2	Biogenesis of lysosome-related organelles complex 1 subunit 1	BLOC1S1		25.958	26.5742	26.1021	26.4084	26.7722	26.8905	26.3716	26.4139	26.0649
Q6QNY1;Q6QNY1-2	Biogenesis of lysosome-related organelles complex 1 subunit 2	BLOC1S2		24.2515	25.8729	26.0166	24.2737	26.0044	25.9274	24.984	26.048	25.9798
Q6QNY0	Biogenesis of lysosome-related organelles complex 1 subunit 3	BLOC1S3		26.2069	25.2258	25.1797	25.8349	25.4452	25.3597	25.7513	24.8848	25.485
Q9NUP1	Biogenesis of lysosome-related organelles complex 1 subunit 4	BLOC1S4		25.3386	25.6207	26.5134	25.7146	26.5291	26.5317	24.8293	25.8815	26.0651
Q8TDH9;Q8TDH9-3	Biogenesis of lysosome-related organelles complex 1 subunit 5	BLOC1S5		27.4214	27.4883	27.1658	27.8186	28.0021	27.563	27.4809	28.1258	27.0895
Q9UL45	Biogenesis of lysosome-related organelles complex 1 subunit 6	BLOC1S6		24.3735	24.2122	24.4087	24.5075	24.0205	22.8663	24.6153	22.578	24.116
P53004	Biliverdin reductase A	BLVRA		30.8054	31.0175	30.7928	30.4556	30.396	30.56	30.5983	30.2926	30.5089
P30043	Flavin reductase (NADPH)	BLVRB		31.1848	31.0635	31.5257	30.9798	31.4522	31.3509	30.6993	31.062	31.2653
P35226	Polycomb complex protein BMI-1	BMI1		28.0475	28.6295	28.7551	28.1683	28.6248	29.2362	28.153	28.8053	28.86
Q9NSY1;Q9NSY1-2;Q9NSY1-3	BMP-2-inducible protein kinase	BMP2K		23.1784	22.8803	23.5475	22.0148	22.7332	NaN	22.1655	22.7004	23.0881
P22004	Bone morphogenetic protein 6	BMP6		22.5871	21.0143	22.4434	23.1545	23.5878	23.1088	23.0303	23.4696	23.4242
P36894	Bone morphogenetic protein receptor type-1A	BMPR1A		22.6019	24.5778	23.7232	23.7685	24.617	24.2894	23.6314	24.9583	24.4397
Q14692	Ribosome biogenesis protein BMS1 homolog	BMS1		30.8932	31.1267	31.1114	31.1008	31.2245	30.8141	31.3093	31.0554	30.9263
Q6ZN30;Q6ZN30-2	Zinc finger protein basonuclin-2	BNC2		24.6716	25.0855	25.0937	25.4667	25.5704	25.7157	25.4678	25.508	25.011
Q12981;Q12981-1;Q12981-2;Q12981-3	Vesicle transport protein SEC20	BNIP1		27.1644	26.8868	26.5848	27.1719	26.7946	26.3851	27.2012	26.3303	27.0331
Q12982;Q12982-2	BCL2/adenovirus E1B 19 kDa protein-interacting protein 2	BNIP2		25.7468	26.8981	25.573	27.0054	26.1817	26.8731	26.9959	27.4141	26.3464
Q12983	BCL2/adenovirus E1B 19 kDa protein-interacting protein 3	BNIP3		21.7057	21.2486	21.3184	23.0008	22.4253	22.9392	22.4572	22.9788	23.0681
O60238;O60238-2	BCL2/adenovirus E1B 19 kDa protein-interacting protein 3-like	BNIP3L		22.3014	22.0689	20.6563	NaN	NaN	NaN	NaN	21.7565	22.0122
Q96IK1;Q96IK1-2	Biorientation of chromosomes in cell division protein 1	BOD1		NaN	NaN	23.9906	24.3068	22.5066	24.203	24.6154	24.5743	25.8896
Q8NFC6	Biorientation of chromosomes in cell division protein 1-like 1	BOD1L1		30.2053	30.3836	30.2914	30.1738	30.43	30.2937	30.4529	30.4329	30.0856
Q9Y3E2	BolA-like protein 1	BOLA1		25.838	26.0685	25.9827	26.0801	26.4828	26.1151	25.7662	25.9916	26.0487
Q9H3K6;Q9H3K6-2	BolA-like protein 2	BOLA2		31.0824	31.21	30.7016	30.8077	31.0715	30.9068	30.7183	30.8054	30.8006
Q53S33	BolA-like protein 3	BOLA3		27.396	27.2984	27.8454	27.4653	27.5842	27.5589	27.6611	27.8166	27.8659
Q14137;Q14137-2	Ribosome biogenesis protein BOP1	BOP1		30.9892	30.8382	30.9188	30.9308	30.8003	30.7168	31.0245	30.5774	30.9085
P07738	Bisphosphoglycerate mutase	BPGM		26.4912	25.4935	25.7595	26.2614	26.0652	25.9928	25.2987	25.4741	25.7963
Q86WA6;Q86WA6-2	Valacyclovir hydrolase	BPHL		27.8759	28.0407	27.6733	27.6529	27.635	27.3468	27.6442	27.5996	27.588
P17213	Bactericidal permeability-increasing protein	BPI		27.7075	27.4423	27.7541	28.2534	27.7385	27.1112	27.9648	27.7501	27.5524
O95861;O95861-4;O95861-2;O95861-3	3(2),5-bisphosphate nucleotidase 1	BPNT1		31.0987	31.1494	31.1216	31.2745	31.2443	31.2689	30.8757	30.9047	30.9684
Q12830-2;Q12830;Q12830-4	Nucleosome-remodeling factor subunit BPTF	BPTF		30.0806	30.3468	30.1114	30.1445	30.359	30.2387	30.5697	30.5186	29.9269
P15056	Serine/threonine-protein kinase B-raf	BRAF		25.9104	25.9324	25.7898	26.4139	26.0386	25.7306	25.1197	25.4445	25.3346
Q7Z569;Q7Z569-2	BRCA1-associated protein	BRAP		27.9125	27.808	27.5324	27.7951	27.9342	27.7616	27.8709	27.9289	27.599
Q6PJG6	BRCA1-associated ATM activator 1	BRAT1		28.9013	28.9756	29.3788	28.5981	28.3267	28.612	28.8438	28.9078	28.7558
P38398;P38398-4;P38398-7;P38398-8	Breast cancer type 1 susceptibility protein	BRCA1		26.7395	26.7139	26.328	26.7399	28.7688	27.0791	27.5326	27.0322	26.9103
P46736-2;P46736;P46736-3;P46736-4;P46736-5	Lys-63-specific deubiquitinase BRCC36	BRCC3		29.5022	29.1002	29.9292	29.3828	29.206	29.5968	29.6528	29.2179	29.562
O95696-2	Bromodomain-containing protein 1	BRD1		28.205	28.1563	27.9352	28.4815	27.9282	28.0768	28.4343	27.9803	28.0921
O95696	Bromodomain-containing protein 1	BRD1		21.9785	22.8397	22.7008	22.9144	23.9046	22.4489	NaN	23.9795	22.3133
P25440;P25440-2;P25440-3;P25440-4	Bromodomain-containing protein 2	BRD2		29.9123	30.3829	30.3274	29.691	30.4379	30.1888	30.1791	30.2374	30.2072
Q15059;Q15059-2	Bromodomain-containing protein 3	BRD3		28.5075	28.5222	28.4872	28.8039	28.7423	28.7915	28.544	28.5383	28.2546
O60885;O60885-2;O60885-3	Bromodomain-containing protein 4	BRD4		30.4258	30.5556	30.5202	30.3018	30.5765	30.5906	30.4738	30.6235	30.7527
Q9NPI1;Q9NPI1-2	Bromodomain-containing protein 7	BRD7		28.9714	28.7647	28.8777	28.6628	28.8827	28.8105	29.0124	28.4796	28.8734
Q9H0E9;Q9H0E9-2;Q9H0E9-4	Bromodomain-containing protein 8	BRD8		28.8523	28.6624	28.5493	28.7922	28.7744	28.3186	29.1703	28.6324	28.4902
Q9H8M2;Q9H8M2-6;Q9H8M2-3;Q9H8M2-1	Bromodomain-containing protein 9	BRD9		25.4772	25.0206	25.5991	25.1012	25.4166	25.3322	25.5514	25.2152	25.5735
Q9NXR7;Q9NXR7-4;Q9NXR7-3;Q9NXR7-1	BRCA1-A complex subunit BRE	BRE		27.4546	28.0399	27.7469	27.8854	27.6385	27.7282	27.9551	27.735	27.6723
Q92994;Q92994-9;Q92994-3;Q92994-7;Q92994-8;Q92994-5	Transcription factor IIIB 90 kDa subunit	BRF1		25.0491	25.3478	24.4283	25.2393	24.2629	25.0213	25.3477	24.1431	25.1525
Q8WY22	BRI3-binding protein	BRI3BP		27.0763	28.0249	27.1587	26.8743	27.8732	27.6508	27.1559	27.858	27.8232
Q9BX63;Q9BX63-2	Fanconi anemia group J protein	BRIP1		NaN	NaN	23.5497	23.2258	NaN	23.8271	23.3909	23.536	23.3961
Q8TDN6	Ribosome biogenesis protein BRX1 homolog	BRIX1		32.9173	32.8434	32.475	32.8815	32.6737	32.2964	33.06	32.9261	32.5022
Q8WUW1;Q8WUW1-2	Protein BRICK1	BRK1		27.6206	28.4829	27.9882	27.7471	28.3649	28.174	27.8838	27.6572	27.5639
Q9HCU9	Breast cancer metastasis-suppressor 1	BRMS1		23.9775	25.9542	24.9497	24.7718	25.6324	24.5616	24.4295	26.1294	24.9053
Q5PSV4;Q5PSV4-2	Breast cancer metastasis-suppressor 1-like protein	BRMS1L		26.1238	25.7997	24.2535	26.218	26.2893	25.3986	26.3427	24.7576	25.3574
Q5VW32;Q5VW32-2	BRO1 domain-containing protein BROX	BROX		30.3168	29.8578	30.4683	30.1976	30.2104	30.0963	29.794	29.812	30.1819
P55201;P55201-4;P55201-3;P55201-2	Peregrin	BRPF1		25.8708	26.8303	26.1715	26.4879	27.2603	26.5925	27.0571	27.1615	26.057
Q9ULD4;Q9ULD4-3;Q9ULD4-2	Bromodomain and PHD finger-containing protein 3	BRPF3		24.3553	23.0897	23.2809	24.2885	23.9487	24.3863	23.7347	23.6922	23.6307
Q9NSI6-2;Q9NSI6;Q9NSI6-3	Bromodomain and WD repeat-containing protein 1	BRWD1		27.2089	27.312	27.2276	26.8533	27.438	27.3649	27.3266	27.1118	26.6544
Q6RI45;Q6RI45-2;Q6RI45-5;Q6RI45-4;Q6RI45-3	Bromodomain and WD repeat-containing protein 3	BRWD3		29.2926	24.7111	24.0662	24.4931	24.5393	24.1089	23.5156	25.0979	25.1747
Q9NW68;Q9NW68-2;Q9NW68-7;Q9NW68-3;Q9NW68-5;Q9NW68-8;Q9NW68-9	BSD domain-containing protein 1	BSDC1		26.7137	26.1129	26.5268	26.0869	25.6537	25.4539	26.0951	26.1636	25.0649
P35613;P35613-2;P35613-4;P35613-3	Basigin	BSG		32.547	32.6452	32.5074	32.4761	32.4732	32.7287	32.5548	32.8346	32.506
Q10589;Q10589-2	Bone marrow stromal antigen 2	BST2		30.3067	30.3804	30.7634	30.5715	30.6388	30.7218	30.6826	30.5863	31.008
O14981	TATA-binding protein-associated factor 172	BTAF1		30.5496	30.0253	30.2956	30.4066	30.0294	30.2497	30.2265	30.0998	30.0718
Q9H0C5;Q9H0C5-2	BTB/POZ domain-containing protein 1	BTBD1		24.948	24.8206	24.2072	24.8597	25.3782	24.4374	24.7936	25.035	25.0409
Q9BX70	BTB/POZ domain-containing protein 2	BTBD2		20.6604	20.5664	20.2988	20.7263	20.4503	19.9728	22.2769	21.0097	21.6823
P43251;P43251-4;P43251-3;P43251-2	Biotinidase	BTD		23.5127	25.6355	24.659	23.9393	25.2555	25.2454	24.7668	25.4958	24.1715
P20290	Transcription factor BTF3	BTF3		32.8941	32.8987	32.8891	32.7917	32.9557	33.0318	32.8095	33.0768	33.1101
P20290-2	Transcription factor BTF3	BTF3		22.0707	20.0712	21.0662	23.1567	22.7132	22.7342	22.8141	22.3512	22.6689
Q96K17;Q96K17-2	Transcription factor BTF3 homolog 4	BTF3L4		30.1395	30.5851	30.8194	30.3977	30.6774	30.2624	30.5246	30.3204	30.8962
Q7KYR7;Q7KYR7-1;Q7KYR7-5;Q7KYR7-3;Q8WVV5;Q7KYR7-6;Q7KYR7-4	Butyrophilin subfamily 2 member A1;Butyrophilin subfamily 2 member A2	BTN2A1;BTN2A2		25.9276	25.9393	25.1354	26.0055	25.2215	25.413	25.957	25.24	25.5872
O43683;O43683-2;O43683-3	Mitotic checkpoint serine/threonine-protein kinase BUB1	BUB1		27.6122	26.5001	27.3869	27.1088	26.9132	26.9853	27.5123	26.6789	27.3675
O60566;O60566-3;O60566-2	Mitotic checkpoint serine/threonine-protein kinase BUB1 beta	BUB1B		29.1162	28.6696	28.5893	29.0349	28.7595	28.7837	28.7823	28.7515	28.801
O43684;O43684-2	Mitotic checkpoint protein BUB3	BUB3		32.7592	32.6771	32.7695	32.5358	32.728	32.4932	32.6896	32.7084	32.6952
Q9BRD0;Q9BRD0-2	BUD13 homolog	BUD13		27.0949	26.9057	27.0754	27.0487	26.8747	26.8057	27.5148	26.7935	27.1303
P41223;P41223-2	Protein BUD31 homolog	BUD31		30.3367	30.1802	30.2096	30.4482	29.8977	30.4354	30.5007	30.4575	30.0784
Q13895	Bystin	BYSL		31.5094	31.1946	30.9921	31.3938	31.052	31.0604	31.5491	30.9636	31.0859
Q7L1Q6;Q7L1Q6-4;Q7L1Q6-3;Q7L1Q6-2	Basic leucine zipper and W2 domain-containing protein 1	BZW1		33.0607	32.798	32.8239	33.1178	32.7239	32.9305	32.9745	32.8566	32.5726
Q9Y6E2	Basic leucine zipper and W2 domain-containing protein 2	BZW2		32.3213	32.3405	32.4196	31.8736	31.9906	32.1107	31.9244	32.2799	32.1142
Q8N655	Uncharacterized protein C10orf12	C10orf12		24.3795	NaN	24.1078	25.2774	23.4498	24.9697	24.996	25.5523	22.7054
Q96B45	UPF0693 protein C10orf32	C10orf32		25.3948	24.8271	24.293	25.6265	24.4356	25.9144	24.0425	25.556	24.6216
Q5T2E6;Q5T2E6-2	UPF0668 protein C10orf76	C10orf76		27.05	27.1948	27.259	27.0122	27.4799	27.2832	27.2443	27.1515	27.5935
Q9H0W9;Q9H0W9-2;Q9H0W9-3;Q9H0W9-4	Ester hydrolase C11orf54	C11orf54		29.5241	29.6303	29.4075	29.5349	29.3527	29.4106	29.5627	29.2787	29.5327
Q6ZUT1;Q6ZUT1-2;Q6ZUT1-3	Uncharacterized protein C11orf57	C11orf57		24.6955	25.0745	24.3233	24.7634	24.7287	25.122	25.8065	25.1542	24.805
Q9H3H3;Q9H3H3-2;Q9H3H3-3	UPF0696 protein C11orf68	C11orf68		27.6719	28.2519	28.147	28.2675	28.3004	28.359	28.284	28.0911	28.4333
Q53FT3	Protein Hikeshi	C11orf73		28.5947	28.8452	28.5569	28.6006	27.9689	28.5318	28.8479	28.9882	28.4846
Q9BUA3	Uncharacterized protein C11orf84	C11orf84		25.4068	24.6576	24.9919	25.6562	25.2046	25.4733	26.3868	25.2183	25.2227
E9PRG8	Uncharacterized protein C11orf98	C11orf98		27.8156	27.7298	27.6945	27.8226	27.5457	27.3193	28.2342	27.9272	28.3248
Q9HB07	UPF0160 protein MYG1, mitochondrial	C12orf10		31.3808	31.3232	31.0231	31.3044	31.0712	31.2399	31.5062	31.2742	30.9995
Q8N999;Q8N999-3	Uncharacterized protein C12orf29	C12orf29		27.8336	27.8924	28.14	28.0708	26.7011	28.2623	27.0799	27.6792	28.4841
Q96C57	Uncharacterized protein C12orf43	C12orf43		27.6726	27.4339	27.4356	27.7958	27.5286	28.1138	27.7934	27.938	27.8385
Q8N5I9	Uncharacterized protein C12orf45	C12orf45		27.3442	27.5214	27.2849	27.2977	28.8166	27.0091	27.6135	27.7636	27.7461
Q99622	Protein C10	C12orf57		27.822	27.7439	28.1998	27.9786	27.9969	28.1702	27.6701	27.5414	28.5837
Q9H3J6;Q9H3J6-2	Probable peptide chain release factor C12orf65, mitochondrial	C12orf65		24.7883	26.3382	24.9058	24.9978	NaN	24.6392	22.7162	NaN	23.7689
Q69YU5	Uncharacterized protein C12orf73	C12orf73		27.3153	28.0674	27.6821	27.8792	27.8576	28.0289	28.0528	27.2822	28.4591
Q9NWQ9	Uncharacterized protein C14orf119	C14orf119		24.2151	23.2756	NaN	24.0378	NaN	NaN	23.9817	23.2288	23.3432
Q9BXV9	Uncharacterized protein C14orf142	C14orf142		26.7078	24.9296	24.7023	26.2504	25.0744	24.8914	26.5004	24.4395	25.3425
Q9Y224	UPF0568 protein C14orf166	C14orf166		31.654	31.8991	31.8187	31.7963	31.7921	31.7889	31.9413	32.0283	31.3561
Q86SX3;Q86SX3-6;Q86SX3-2;Q86SX3-5;Q86SX3-3	Uncharacterized protein C14orf80	C14orf80		24.3097	23.9332	23.7467	23.7536	23.688	23.334	23.7989	23.4267	24.4999
Q8WUR7;Q8WUR7-2;Q8WUR7-3	UPF0235 protein C15orf40	C15orf40		27.3252	27.1428	26.5763	27.2304	27.0964	27.3845	26.9442	27.341	26.8883
A6NNL5	Uncharacterized protein C15orf61	C15orf61		23.4736	23.2029	24.47	22.9796	24.5834	24.2433	23.4851	24.4843	23.6717
Q96S19;Q96S19-6;Q96S19-4;Q96S19-3;Q96S19-5;Q96S19-2	UPF0585 protein C16orf13	C16orf13		27.6913	26.8928	27.439	27.197	27.984	27.9049	26.877	27.4379	27.783
Q96GQ5;Q96GQ5-2	RUS1 family protein C16orf58	C16orf58		26.2228	25.8808	25.8574	26.4042	25.906	25.2271	26.3626	24.705	25.9284
Q9BSU1	UPF0183 protein C16orf70	C16orf70		23.6273	24.7865	24.5319	24.2395	24.7073	24.6875	24.3011	24.6927	25.6424
Q6PH81	UPF0547 protein C16orf87	C16orf87		24.6491	24.6059	25.0777	24.4482	24.4039	25.261	24.6376	24.741	26.457
Q8N3J3;Q8N3J3-3;Q8N3J3-4	Uncharacterized protein C17orf53	C17orf53		21.8254	21.9017	24.8726	21.8193	22.8148	22.8055	22.0377	22.6752	22.0275
Q96GS4	Uncharacterized protein C17orf59	C17orf59		25.3768	25.3227	25.5064	25.1994	26.3556	25.2662	25.267	25.0352	25.8243
Q9BQA9;Q9BQA9-2	Uncharacterized protein C17orf62	C17orf62		27.0798	27.1363	26.5616	26.9389	27.0785	25.8967	27.001	26.2978	26.8405
Q9HAS0	Protein Njmu-R1	C17orf75		27.674	27.8848	27.4028	27.9259	27.2941	26.9789	27.7933	27.7087	27.2649
Q9BSJ5;Q9BSJ5-3;Q9BSJ5-2	Uncharacterized protein C17orf80	C17orf80		26.7232	26.4706	28.4653	27.0972	25.8672	26.7424	27.1472	26.6868	27.064
Q53F19;Q53F19-2	Uncharacterized protein C17orf85	C17orf85		29.3082	29.1505	29.2376	29.4752	29.0233	29.1239	29.5628	29.2722	29.0609
Q32NC0;Q32NC0-2	UPF0711 protein C18orf21	C18orf21		27.3419	27.1937	26.5132	27.2206	26.9402	26.9506	27.357	26.9928	26.9163
Q96B23-2;Q96B23	Uncharacterized protein C18orf25	C18orf25		27.9035	27.6495	27.881	28.075	27.7962	28.1996	27.9399	28.0048	28.0539
Q8TCD1	UPF0729 protein C18orf32	C18orf32		26.0053	26.1114	26.3687	25.9069	26.2291	26.1125	26.0552	26.2216	26.7819
Q96DM3	Uncharacterized protein C18orf8	C18orf8		25.716	26.5228	25.1838	25.675	26.2283	25.7748	25.9762	26.5791	25.0185
Q9UFG5	UPF0449 protein C19orf25	C19orf25		24.258	24.2074	23.4816	23.5767	23.8231	23.523	23.9114	23.3975	22.2152
Q9BQ61	Uncharacterized protein C19orf43	C19orf43		30.278	29.8581	29.9334	30.172	29.8599	30.0075	30.1948	30.0014	30.0743
Q8N9M1-2;Q8N9M1;Q8N9M1-3	Uncharacterized protein C19orf47	C19orf47		26.4246	26.364	26.0528	27.126	26.2486	26.0917	27.1909	26.6315	26.1458
Q9BSF4	Uncharacterized protein C19orf52	C19orf52		27.2529	27.2088	26.57	26.7255	26.9748	26.83	26.4092	27.0714	26.7902
Q9UNZ5	Leydig cell tumor 10 kDa protein homolog	C19orf53		30.6065	31.0115	29.9392	30.964	31.0081	30.8655	31.3153	31.1055	30.4374
Q96EU7	C1GALT1-specific chaperone 1	C1GALT1C1		NaN	23.0712	23.7381	NaN	NaN	23.4346	21.3085	22.83	23.8186
Q9NX04;Q9NX04-2	Uncharacterized protein C1orf109	C1orf109		NaN	25.284	20.3796	25.0213	20.6679	23.9216	20.5321	20.6626	NaN
Q9NSG2;Q9NSG2-2;Q9NSG2-3	Uncharacterized protein C1orf112	C1orf112		25.9191	25.002	25.7727	25.7706	24.878	25.8759	25.3122	25.2967	24.936
Q6ZSJ8;Q6ZSJ8-2	Uncharacterized protein C1orf122	C1orf122		27.0274	26.6021	26.8113	27.038	27.2589	26.9033	27.0656	26.7118	25.5183
Q9NWV4	UPF0587 protein C1orf123	C1orf123		29.2161	29.7723	29.4599	29.4509	29.3171	29.1114	29.2489	29.4403	29.8021
Q8NDD1;Q8NDD1-2	Uncharacterized protein C1orf131	C1orf131		28.3562	27.9039	27.4689	28.4492	27.8736	27.6515	28.5145	27.7819	27.9428
Q8NDD1-3	Uncharacterized protein C1orf131	C1orf131		NaN	23.5163	23.5423	24.1703	23.9146	NaN	24.5086	23.8815	23.9856
Q8IYL3	UPF0688 protein C1orf174	C1orf174		27.3022	27.3701	27.3397	28.0706	27.4874	27.3169	27.9813	27.4978	27.245
Q9H425;Q9H425-3;Q9H425-2	Uncharacterized protein C1orf198	C1orf198		24.25	24.4732	24.4844	24.5107	22.0221	23.3299	23.6978	21.9063	24.6583
A1L170;A1L170-2	Uncharacterized protein C1orf226	C1orf226		24.4904	25.5066	24.8251	24.5148	25.6224	25.4169	24.5229	25.5711	24.8607
Q9BWL3;Q9BWL3-4;Q9BWL3-2;Q9BWL3-5;Q9BWL3-3	Uncharacterized protein C1orf43	C1orf43		23.4262	23.3958	21.7711	22.9517	23.0609	23.5275	23.3803	23.7526	23.316
Q9BV19	Uncharacterized protein C1orf50	C1orf50		24.4033	25.9187	26.4075	24.0651	25.2994	25.9143	23.8872	26.2938	23.0477
Q8N6N3;Q8N6N3-2	UPF0690 protein C1orf52	C1orf52		27.5478	27.302	26.6677	27.9774	27.4	25.9321	27.3621	28.0607	26.8887
Q07021	Complement component 1 Q subcomponent-binding protein, mitochondrial	C1QBP		32.5937	32.456	32.5741	32.4696	32.5401	32.3003	32.4317	32.2125	32.7458
Q9BXI9;Q9BXI9-2;Q9BXI9-3	Complement C1q tumor necrosis factor-related protein 6	C1QTNF6		26.8677	25.5065	26.2247	27.2279	26.8239	25.8829	27.0111	27.0531	27.4727
Q9BUV8;Q9BUV8-4;Q9BUV8-3;Q9BUV8-2;Q9BUV8-5	Uncharacterized protein C20orf24	C20orf24		26.9704	27.0192	26.8201	27.1897	27.0588	26.9072	27.0908	26.6991	26.5121
Q9GZN8;Q9GZN8-2	UPF0687 protein C20orf27	C20orf27		29.1893	29.1189	29.7575	29.1378	29.8568	29.8245	29.2717	29.645	29.4263
P30042;P30042-2	ES1 protein homolog, mitochondrial	C21orf33		30.9351	31.0603	31.2061	31.1573	30.994	30.8458	30.7056	30.5606	30.7891
P57076	UPF0769 protein C21orf59	C21orf59		29.201	28.9737	29.3013	29.0497	28.6442	29.031	28.8633	28.3973	28.7304
Q9Y426;Q9Y426-2;Q9Y426-3	C2 domain-containing protein 2	C2CD2		25.7981	25.249	25.8268	24.3946	25.2023	25.4038	22.9265	25.1473	24.8748
Q4AC94;Q4AC94-2;Q4AC94-4;Q4AC94-1;Q4AC94-3	C2 domain-containing protein 3	C2CD3		21.3355	20.4354	20.6116	22.1872	20.9477	20.7241	21.5373	20.1009	20.7412
Q86YS7-3;Q86YS7;Q86YS7-2;Q86YS7-4;Q86YS7-5	C2 domain-containing protein 5	C2CD5		26.5057	27.3741	27.6352	26.6428	27.1507	27.3141	26.526	27.4491	27.2911
Q9NWW7	Uncharacterized protein C2orf42	C2orf42		27.7119	28.191	27.9717	27.6651	27.6966	28.2576	27.4584	28.2464	28.2617
Q9H6V9;Q9H6V9-2;Q9H6V9-3;Q9H6V9-4	UPF0554 protein C2orf43	C2orf43		25.3499	25.0016	25.461	25.6048	25.2348	24.9156	24.8105	25.2756	24.9605
Q9H6R7;Q9H6R7-3;Q9H6R7-2	WD repeat and coiled-coil-containing protein C2orf44	C2orf44		25.3583	25.2994	25.4239	26.2664	23.6764	25.1596	25.9359	23.7436	24.9912
Q8WWC4	Uncharacterized protein C2orf47, mitochondrial	C2orf47		29.6634	29.6447	29.2727	29.4698	29.3162	29.4463	29.4983	29.5081	29.1664
Q9BVC5;Q9BVC5-2	Ashwin	C2orf49		28.1384	28.3083	27.6564	27.9586	28.2711	27.6415	28.1965	27.8203	27.4309
Q3KRA6	UPF0538 protein C2orf76	C2orf76		26.9789	26.2675	26.0173	27.1647	26.4506	26.3535	26.9115	26.8852	26.5278
Q6NW34;Q6NW34-2	Uncharacterized protein C3orf17	C3orf17		28.0936	27.9772	28.0962	27.8747	28.1236	27.9705	28.2015	27.9482	28.3069
Q5JPI3;Q5JPI3-2	Uncharacterized protein C3orf38	C3orf38		25.9441	25.7753	25.0852	25.3191	25.8592	25.8198	24.8331	26.0795	25.3135
Q8NDZ4;Q8NDZ4-2	Deleted in autism protein 1	C3orf58		26.1584	26.2547	26.4734	26.0774	25.5515	26.078	25.064	25.094	25.9172
P20851;P20851-2	C4b-binding protein beta chain	C4BPB		26.2684	26.6305	24.9855	25.6239	26.2748	24.9989	25.4462	26.0028	25.452
Q9NWY4	UPF0609 protein C4orf27	C4orf27		28.6549	28.0545	28.2012	29.2243	28.0722	28.3391	29.263	28.3803	29.0822
Q8WVX3;Q8WVX3-2	Uncharacterized protein C4orf3	C4orf3		25.8752	26.0414	26.4765	25.8034	25.9295	26.2166	25.4488	26.1591	25.8832
P21730	C5a anaphylatoxin chemotactic receptor 1	C5AR1		22.2781	22.7513	20.6663	21.0332	22.3196	NaN	NaN	NaN	NaN
Q49AR2;Q49AR2-2	UPF0489 protein C5orf22	C5orf22		26.1692	26.2826	26.8608	26.4317	26.2571	26.7425	25.5611	26.1633	26.718
Q7Z6I8;Q7Z6I8-2	UPF0461 protein C5orf24	C5orf24		26.9199	27.5294	26.5028	26.865	27.582	27.2919	27.3992	27.5062	27.1336
Q96GV9	UNC119-binding protein C5orf30	C5orf30		24.7855	23.6245	23.7013	24.682	24.6348	24.205	24.395	23.7328	26.5463
A6NDU8	UPF0600 protein C5orf51	C5orf51		28.0762	28.4265	28.6829	28.669	28.6522	28.6811	28.6358	28.6337	28.9053
Q9H6K1;Q9H6K1-2	Uncharacterized protein C6orf106	C6orf106		27.0681	26.818	26.7766	26.6172	27.1459	26.9619	27.1855	26.8468	27.059
Q7Z4R8	UPF0669 protein C6orf120	C6orf120		24.3208	24.0366	22.7019	23.5197	23.7696	23.3072	23.4457	23.822	23.5894
Q9P0P8	Uncharacterized protein C6orf203	C6orf203		23.9145	24.9102	23.8722	22.3133	24.7278	24.327	24.342	24.7151	23.9553
Q6UWU4;Q6UWU4-3;Q6UWU4-2	Bombesin receptor-activated protein C6orf89	C6orf89		22.9191	22.3366	20.7402	21.9001	22.365	21.4287	22.0314	21.2999	21.561
Q9BPX7;Q9BPX7-2	UPF0415 protein C7orf25	C7orf25		23.5359	24.234	24.2898	23.5742	24.1623	23.9362	23.8436	24.8559	25.0785
Q96N11;Q96N11-2	Uncharacterized protein C7orf26	C7orf26		24.2288	25.7632	25.2084	25.919	25.5728	24.9244	26.3116	25.6385	25.3264
Q9BRJ6	Uncharacterized protein C7orf50	C7orf50		29.7355	29.6397	30.0365	29.0402	29.1066	29.1083	29.8658	29.4847	29.8389
Q96HJ9	UPF0562 protein C7orf55	C7orf55		26.1283	25.7305	25.8991	25.6124	25.8912	26.4658	25.236	26.1246	26.3331
Q96HJ9-2;Q9Y383-2	UPF0562 protein C7orf55;Putative RNA-binding protein Luc7-like 2	C7orf55;LUC7L2		32.5162	32.6212	32.4186	32.7973	32.6994	32.4855	32.7822	32.5693	32.6388
Q9H7E9;Q9H7E9-2	UPF0488 protein C8orf33	C8orf33		29.3565	29.2668	29.2871	29.266	29.0738	29.156	29.2333	29.6185	29.1232
Q8N0T1	Uncharacterized protein C8orf59	C8orf59		26.9562	26.3376	26.632	27.5598	26.8948	27.2302	27.5356	26.9365	27.4097
Q6P1X6;Q6P1X6-2	UPF0598 protein C8orf82	C8orf82		27.4277	27.9398	28.0859	27.8668	27.9412	28.0136	28.2679	28.0186	27.5551
Q5T280	Putative methyltransferase C9orf114	C9orf114		27.7608	28.4172	27.9435	28.4842	28.2369	28.2607	28.8711	28.725	28.0824
Q9BUH6	Protein PAXX	C9orf142		25.6098	NaN	26.2404	25.2372	23.8465	26.4456	25.1933	23.678	25.5954
Q8IXQ3	Uncharacterized protein C9orf40	C9orf40		26.8708	25.9322	24.8315	26.4162	26.2063	26.357	26.0332	25.6116	26.112
Q8N4J0	UPF0586 protein C9orf41	C9orf41		25.605	25.6135	25.673	26.0852	26.393	25.7847	25.9138	26.1725	25.6023
Q5T6V5	UPF0553 protein C9orf64	C9orf64		29.7208	29.479	29.7231	29.7836	29.5038	30.1786	29.7775	29.536	29.7898
Q9NZ63	Uncharacterized protein C9orf78	C9orf78		29.7359	29.3762	29.0447	29.7726	29.3825	29.7438	29.2565	29.3176	28.9781
Q96MD7-1;Q96MD7	Uncharacterized protein C9orf85	C9orf85		22.3886	23.3999	23.2055	23.621	21.0612	23.559	23.6289	22.9809	22.1154
Q96LW7-2;Q96LW7	Bcl10-interacting CARD protein	C9orf89		25.374	24.8654	25.2944	25.5855	24.2556	25.6018	25.4735	25.5147	24.7018
Q9H8G2;Q9H8G2-2	Caspase activity and apoptosis inhibitor 1	CAAP1		28.2018	27.0226	27.4693	28.083	27.9712	26.8882	27.1628	26.9489	27.1824
Q9Y376	Calcium-binding protein 39	CAB39		30.0848	29.9626	29.8939	30.0021	29.7853	29.7649	30.041	29.1948	30.0828
Q9Y6J0;Q9Y6J0-2	Calcineurin-binding protein cabin-1	CABIN1		26.5646	26.2281	26.1632	26.3143	26.5506	26.3956	26.8558	26.2843	26.5272
Q8TDN4;Q8TDN4-2	CDK5 and ABL1 enzyme substrate 1	CABLES1		23.2316	25.1639	23.7119	23.0485	24.7245	24.4888	NaN	25.1903	24.7439
Q08289;Q08289-2;Q08289-6;Q08289-10;Q08289-3;Q08289-9;Q08289-5;Q08289-7;Q08289-4;Q08289-8	Voltage-dependent L-type calcium channel subunit beta-2	CACNB2		24.8845	22.3112	22.32	25.0998	22.5888	23.169	23.9425	21.9839	21.3872
Q8WUQ7;Q8WUQ7-2	Cactin	CACTIN		27.6859	27.2405	26.8417	27.3844	27.4173	27.343	27.5075	27.0773	27.288
Q86Y37;Q86Y37-2;Q86Y37-4	CDK2-associated and cullin domain-containing protein 1	CACUL1		27.2031	25.9899	25.4197	26.5324	26.16	25.7866	25.9327	25.9598	25.9377
Q9HB71;Q9HB71-3	Calcyclin-binding protein	CACYBP		33.8071	33.5292	33.7093	33.7445	34.083	33.6856	33.5418	33.7382	33.5595
P27708	CAD protein;Glutamine-dependent carbamoyl-phosphate synthase;Aspartate carbamoyltransferase;Dihydroorotase	CAD		32.6531	32.6974	32.6774	32.558	32.4948	32.8723	32.4698	32.6104	32.6421
Q9BY67;Q9BY67-5;Q9BY67-4;Q9BY67-3;Q9BY67-2	Cell adhesion molecule 1	CADM1		27.6108	27.7958	27.219	26.9962	27.1019	27.1219	26.6378	27.6209	26.5347
Q8NFZ8	Cell adhesion molecule 4	CADM4		22.6077	23.5057	22.6912	NaN	23.0701	22.2797	23.0239	22.0651	NaN
Q9P1Z2;Q9P1Z2-2;Q9P1Z2-3;Q9P1Z2-4	Calcium-binding and coiled-coil domain-containing protein 1	CALCOCO1		27.6091	26.5296	24.8377	27.225	26.4456	NaN	27.3156	23.2508	NaN
Q13137-4;Q13137;Q13137-3;Q13137-5;Q13137-2	Calcium-binding and coiled-coil domain-containing protein 2	CALCOCO2		27.9576	27.8364	28.1328	27.4304	27.7501	27.6016	28.1765	28.0226	27.3359
Q05682-3	Caldesmon	CALD1		32.4775	32.666	32.5706	32.8195	32.7169	32.8485	32.4617	32.484	32.4459
Q05682-5	Caldesmon	CALD1		27.1256	27.0699	27.0268	27.6547	27.1222	26.953	27.165	26.2256	26.2571
Q05682-6;Q05682-2;Q05682	Caldesmon	CALD1		25.1441	26.0583	23.6368	25.8205	25.8682	22.2418	25.6682	24.1645	25.4386
P62158	Calmodulin	CALM1		34.2199	34.7125	34.6907	34.4259	34.6432	34.7265	34.4435	34.7278	34.7388
P27797	Calreticulin	CALR		34.7498	34.6277	34.6409	34.7668	34.5665	34.6507	34.7233	34.5102	34.6102
O43852-4;O43852-2;O43852-8	Calumenin	CALU		32.641	32.8709	32.9071	32.6312	32.692	32.8174	32.4963	32.5824	32.624
O43852;O43852-3;O43852-6;O43852-15;O43852-10;O43852-5	Calumenin	CALU		28.9815	30.0905	30.2335	29.7196	29.9311	30.0161	29.8939	30.0643	29.9472
Q8IU85;Q8IU85-2	Calcium/calmodulin-dependent protein kinase type 1D	CAMK1D		28.1578	28.57	28.011	27.8759	28.3277	27.807	28.2028	28.3896	28.1878
Q13557;Q13557-8;Q13557-10;Q13557-6;Q13557-11;Q13557-12;Q13557-9;Q13557-5;Q13557-3;Q13557-4	Calcium/calmodulin-dependent protein kinase type II subunit delta	CAMK2D		27.3701	27.6227	27.9473	27.3401	27.7281	27.771	27.714	27.7296	27.3735
Q13555-8;Q13555-2;Q13555;Q13555-4	Calcium/calmodulin-dependent protein kinase type II subunit gamma	CAMK2G		29.7248	30.3758	30.0492	29.8943	30.2553	29.9435	30.4019	30.2607	30.5148
Q13555-7;Q13555-10;Q13555-3	Calcium/calmodulin-dependent protein kinase type II subunit gamma	CAMK2G		23.9917	23.1689	23.2848	24.096	24.4121	23.2598	21.7026	24.3039	24.2201
Q13555-6;Q13555-5	Calcium/calmodulin-dependent protein kinase type II subunit gamma	CAMK2G		22.1074	21.3358	21.4216	22.1724	22.6449	21.9924	21.9216	22.1309	22.3431
Q13555-9	Calcium/calmodulin-dependent protein kinase type II subunit gamma	CAMK2G		23.4099	21.5692	21.4194	NaN	23.6147	21.8497	21.8697	23.7079	22.7994
Q8N5S9;Q8N5S9-2	Calcium/calmodulin-dependent protein kinase kinase 1	CAMKK1		27.1399	26.5687	26.8559	26.9826	26.5717	26.8676	26.7096	26.2479	26.4577
Q96RR4;Q96RR4-3;Q96RR4-6;Q96RR4-5;Q96RR4-2;Q96RR4-4;Q96RR4-7	Calcium/calmodulin-dependent protein kinase kinase 2	CAMKK2		24.8121	25.5246	24.7987	25.6681	24.0496	24.913	24.5976	24.8523	24.1778
Q7Z624;Q7Z624-2	Calmodulin-lysine N-methyltransferase	CAMKMT		22.4147	22.8551	22.5354	22.1717	22.2393	23.5924	22.8911	23.5639	23.7537
P49069	Calcium signal-modulating cyclophilin ligand	CAMLG		24.7631	24.4196	24.6539	24.1332	25.4081	24.9473	25.365	24.9315	24.7866
Q5T5Y3;Q5T5Y3-3;Q5T5Y3-2	Calmodulin-regulated spectrin-associated protein 1	CAMSAP1		24.9223	25.6486	25.9743	25.4549	25.6566	25.7336	25.5604	25.7532	25.8439
Q08AD1;Q08AD1-3;Q08AD1-2	Calmodulin-regulated spectrin-associated protein 2	CAMSAP2		28.929	28.713	28.9437	28.9382	28.6362	28.8606	28.5766	28.646	28.6593
Q9P1Y5;Q9P1Y5-2	Calmodulin-regulated spectrin-associated protein 3	CAMSAP3		23.8117	24.9348	25.3859	23.9519	24.776	25.2699	24.5235	24.9131	24.9109
Q86VP6;Q86VP6-2	Cullin-associated NEDD8-dissociated protein 1	CAND1		33.9106	34.0195	34.0235	33.9342	34.0757	34.0282	33.9509	33.9933	33.9574
Q8WVQ1;Q8WVQ1-3	Soluble calcium-activated nucleotidase 1	CANT1		27.0075	26.7234	26.8821	26.7584	26.3589	26.9926	26.4129	26.8174	27.0818
P27824;P27824-2;P27824-3	Calnexin	CANX		34.1132	34.0174	33.9099	33.9123	33.8142	34.0115	33.9311	34.0523	34.0464
Q01518;Q01518-2	Adenylyl cyclase-associated protein 1	CAP1		33.2988	33.4369	33.4117	33.3487	33.4795	33.5546	33.2498	33.4906	33.5099
P40123;P40123-2	Adenylyl cyclase-associated protein 2	CAP2		30.7679	30.837	30.461	30.5864	30.0943	30.3519	30.5519	30.3734	30.602
P40121;P40121-2	Macrophage-capping protein	CAPG		32.2697	32.3579	32.0406	32.3242	32.3568	32.3694	32.2584	32.3768	32.5257
P07384	Calpain-1 catalytic subunit	CAPN1		30.2855	30.3771	30.1277	30.1766	30.0349	30.1535	30.1022	30.3305	30.2985
Q9HC96;Q9HC96-5;Q9HC96-4;Q9HC96-3;Q9HC96-2	Calpain-10	CAPN10		28.3747	26.2298	26.1104	27.9638	27.8399	26.1013	27.9054	25.7876	25.814
O75808;O75808-2	Calpain-15	CAPN15		23.7693	23.9752	22.6502	22.4823	21.9873	24.6032	23.1445	23.6583	24.5947
P17655;P17655-2	Calpain-2 catalytic subunit	CAPN2		32.2224	32.1087	32.1633	32.3342	31.9558	32.0433	31.9671	31.8634	31.9719
Q9Y6W3	Calpain-7	CAPN7		27.3492	27.2714	27.7969	27.366	27.319	28.0588	27.638	27.5502	27.5636
P04632	Calpain small subunit 1	CAPNS1		31.9016	31.965	31.7686	31.8996	31.465	31.5799	31.4712	31.3839	31.5295
Q14444;Q14444-2	Caprin-1	CAPRIN1		33.1811	33.0296	33.1588	33.2126	33.1622	33.2154	33.1991	33.3537	33.4151
P52907	F-actin-capping protein subunit alpha-1	CAPZA1		32.1766	32.3639	32.1345	32.3125	32.3933	32.5426	32.2065	32.3592	32.5403
P47755;P47755-2	F-actin-capping protein subunit alpha-2	CAPZA2		30.5221	30.8112	30.6982	30.6084	30.7572	31.034	30.7264	30.8086	30.7003
P47756-2;P47756	F-actin-capping protein subunit beta	CAPZB		32.3123	32.3318	32.1815	32.6943	32.7321	32.2177	32.5	32.3899	32.1239
Q9BXL6;Q9BXL6-2	Caspase recruitment domain-containing protein 14	CARD14		27.0002	27.4075	27.106	27.6877	27.6825	27.1464	27.1498	27.294	27.7448
Q9Y2V2	Calcium-regulated heat stable protein 1	CARHSP1		31.6198	31.9523	32.1996	32.0374	32.1959	31.6415	31.8853	31.9567	32.0005
Q8IW45;Q8IW45-2;Q8IW45-4	ATP-dependent (S)-NAD(P)H-hydrate dehydratase	CARKD		26.8891	27.2179	26.8742	26.9055	27.1472	27.1169	26.8785	27.2828	27.7807
Q86X55;Q86X55-1;Q86X55-2	Histone-arginine methyltransferase CARM1	CARM1		30.9661	30.7069	30.5673	30.6726	30.515	30.4552	30.5296	30.536	30.7741
P49589-3;P49589	Cysteine--tRNA ligase, cytoplasmic	CARS		32.4697	32.4052	32.1352	31.8794	31.6658	31.6917	32.2269	31.7208	31.9276
P49589-2	Cysteine--tRNA ligase, cytoplasmic	CARS		25.7879	25.4948	25.7972	25.9055	24.8654	24.3808	26.0329	25.2533	24.8516
Q9HA77	Probable cysteine--tRNA ligase, mitochondrial	CARS2		29.298	29.4999	29.6327	29.04	29.3779	29.4723	29.2513	29.2601	29.3306
O15234	Protein CASC3	CASC3		26.5163	26.7928	26.7025	26.698	26.9518	26.6963	26.5668	27.0033	27.2127
Q6P4E1;Q6P4E1-5;Q6P4E1-4;Q6P4E1-2	Protein CASC4	CASC4		26.1983	25.732	26.7387	26.2766	25.9565	25.0587	25.5446	26.5419	26.6718
Q8NG31;Q8NG31-2;Q8NG31-4;Q8NG31-3	Protein CASC5	CASC5		25.9288	25.9425	25.7134	26.0106	25.9841	25.8877	25.3658	26.1508	25.8103
O14936;O14936-3;O14936-4;O14936-6;O14936-2	Peripheral plasma membrane protein CASK	CASK		28.4875	28.3154	29.0714	29.0573	28.405	29.3669	28.6516	29.3283	29.0246
Q8WXE0;Q8WXE0-2	Caskin-2	CASKIN2		26.5338	26.9718	27.0302	26.7202	26.8267	27.0754	26.3344	26.7263	26.7809
P42575	Caspase-2;Caspase-2 subunit p18;Caspase-2 subunit p13;Caspase-2 subunit p12	CASP2		28.8	28.6779	29.1826	28.897	29.0934	28.9893	28.8806	28.9002	28.7319
P42574	Caspase-3;Caspase-3 subunit p17;Caspase-3 subunit p12	CASP3		28.4278	28.3658	28.4716	28.7198	28.3304	28.5971	28.3224	28.2061	28.0796
P49662;P49662-2;P49662-4	Caspase-4;Caspase-4 subunit 1;Caspase-4 subunit 2	CASP4		25.774	25.2782	25.6288	24.5605	25.5642	24.5487	25.6187	25.4002	25.8145
P55212;P55212-2	Caspase-6;Caspase-6 subunit p18;Caspase-6 subunit p11	CASP6		27.4267	27.195	27.3301	26.7665	26.4962	27.8791	26.9741	27.1853	27.509
P55210;P55210-4;P55210-3	Caspase-7;Caspase-7 subunit p20;Caspase-7 subunit p11	CASP7		27.8382	27.8587	27.7817	27.9514	28.1342	28.6862	27.7399	28.4786	28.6649
Q14790-9;Q14790;Q14790-2;Q14790-4;Q14790-3;Q14790-8;Q14790-7;Q14790-6;Q14790-5	Caspase-8;Caspase-8 subunit p18;Caspase-8 subunit p10	CASP8		28.4898	28.5488	28.3583	28.3769	29.0454	28.3662	28.2815	29.6134	28.504
Q9UKL3	CASP8-associated protein 2	CASP8AP2		26.8502	22.9156	24.0552	27.1321	22.6759	22.3054	27.8839	24.6943	24.4545
P55211;P55211-4;P55211-2	Caspase-9;Caspase-9 subunit p35;Caspase-9 subunit p10	CASP9		23.553	25.5019	23.9027	23.8239	25.2221	24.6852	24.622	25.9162	25.6393
P20810-6;P20810-10;P20810-7;P20810-9;P20810-5;P20810;P20810-8;P20810-4;P20810-2;P20810-3	Calpastatin	CAST		33.1209	32.9939	33.0803	33.1817	33.1193	33.0906	33.1939	33.1995	33.342
P04040	Catalase	CAT		31.4139	31.4578	31.4994	31.1565	31.2836	31.2587	31.3374	31.3992	31.581
Q03135	Caveolin-1	CAV1		31.0543	31.021	31.1076	30.804	30.8887	30.116	30.4592	29.8837	30.6745
Q03135-2	Caveolin-1	CAV1		26.5682	23.1885	21.9019	26.4848	23.8366	22.7339	26.6625	22.5504	21.5798
P51636;P51636-2;P51636-3	Caveolin-2	CAV2		27.8793	26.2148	27.1932	27.4981	26.0175	26.9649	26.4649	26.9159	25.8667
Q13951-2	Core-binding factor subunit beta	CBFB		29.7635	30.2192	29.8663	30.0969	30.3519	29.9627	29.9295	30.1609	29.4941
Q13951	Core-binding factor subunit beta	CBFB		28.1444	27.4657	27.5947	27.7682	27.6875	27.7193	27.961	27.4758	27.2541
P22681	E3 ubiquitin-protein ligase CBL	CBL		27.3545	27.0373	27.0894	27.1427	26.9535	27.459	26.8782	26.6132	27.0737
Q75N03;Q75N03-2	E3 ubiquitin-protein ligase Hakai	CBLL1		27.224	27.0011	26.9879	27.0738	27.1062	26.45	27.1074	26.7597	26.9368
P16152;P16152-2	Carbonyl reductase [NADPH] 1	CBR1		32.8809	32.7708	32.6038	32.8428	32.3784	32.5807	32.6605	32.269	32.4198
O75828	Carbonyl reductase [NADPH] 3	CBR3		29.4072	29.0404	28.7497	29.4612	29.0745	28.7169	28.7192	28.0034	28.2147
Q8N4T8;Q8N4T8-2	Carbonyl reductase family member 4	CBR4		26.6974	27.1125	26.7973	27.4025	27.2117	26.6942	27.2184	27.0365	26.8481
P35520;P0DN79;P35520-2	Cystathionine beta-synthase	CBS		32.0154	32.4033	32.3715	31.8473	32.3838	32.0063	31.8453	31.9886	31.8319
Q9BRT8;Q9BRT8-3;Q9BRT8-2	COBW domain-containing protein 1	CBWD1		24.2724	24.9005	23.8136	23.4297	25.0104	23.1277	22.8253	22.9169	24.5367
Q8IUF1	COBW domain-containing protein 2	CBWD2		28.5879	27.9388	28.0718	28.6324	28.2066	28.541	28.2977	28.1338	28.2107
P83916	Chromobox protein homolog 1	CBX1		29.7032	29.6809	29.5874	30.2201	30.0153	29.9242	30.3448	29.5523	29.9058
Q14781	Chromobox protein homolog 2	CBX2		26.6811	26.464	26.3527	26.2733	26.6492	26.7121	26.8543	26.629	26.0035
Q13185	Chromobox protein homolog 3	CBX3		32.4606	32.4634	32.5009	32.5407	32.2276	32.1289	32.5105	32.3805	32.4102
O00257	E3 SUMO-protein ligase CBX4	CBX4		28.2741	28.3706	29.0818	28.1351	28.3131	29.3087	28.3164	28.5504	28.5244
P45973	Chromobox protein homolog 5	CBX5		31.7437	31.5769	31.4254	31.6071	31.7065	31.8438	31.637	31.8858	31.5116
O95503	Chromobox protein homolog 6	CBX6		25.4034	26.6024	26.8037	25.4313	26.8088	26.23	25.9599	26.1973	25.6342
Q9HC52	Chromobox protein homolog 8	CBX8		29.4569	29.615	29.7439	29.7313	29.7571	29.9578	29.6385	29.9072	29.6635
Q6P1N0;Q6P1N0-2	Coiled-coil and C2 domain-containing protein 1A	CC2D1A		29.105	29.4831	29.4591	29.0837	29.2147	29.3465	29.0694	29.276	29.2749
Q5T0F9-2;Q5T0F9;Q5T0F9-3	Coiled-coil and C2 domain-containing protein 1B	CC2D1B		27.0617	26.8614	26.7564	27.4104	26.7654	27.004	27.0419	26.7647	26.6324
Q8IX12;Q8IX12-2	Cell division cycle and apoptosis regulator protein 1	CCAR1		32.1053	32.246	32.038	32.0276	32.1961	32.163	32.4703	32.3282	32.011
Q8N163;Q8N163-2	Cell cycle and apoptosis regulator protein 2	CCAR2		31.2271	31.5705	31.3101	31.4067	31.3779	31.3361	31.4678	31.3484	31.3962
Q16773;Q16773-2	Kynurenine--oxoglutarate transaminase 1	CCBL1		27.1018	27.9121	27.7243	27.4071	27.8342	27.9115	27.8838	28.0349	28.4699
Q6YP21;Q6YP21-3	Kynurenine--oxoglutarate transaminase 3	CCBL2		30.4442	30.4007	30.431	30.4799	30.5378	30.4697	30.3699	30.1942	30.3105
Q96ES7	SAGA-associated factor 29 homolog	CCDC101		25.858	24.6685	24.7217	26.4079	25.1192	25.3958	26.1976	26.3926	25.3918
Q96A19	Coiled-coil domain-containing protein 102A	CCDC102A		24.7653	24.5861	23.9489	26.0264	25.2978	24.599	24.6266	25.134	24.3379
Q9NWR8	Calcium uniporter regulatory subunit MCUb, mitochondrial	CCDC109B		24.5973	21.9383	24.2562	25.3031	23.3288	24.4742	25.1047	23.5748	24.1447
Q96NT0	Coiled-coil domain-containing protein 115	CCDC115		25.4133	25.5621	24.168	24.5434	25.576	22.6594	25.6626	24.9344	25.2392
Q8IWD4;Q8IWD4-3;Q8IWD4-2;Q8IWD4-4	Coiled-coil domain-containing protein 117	CCDC117		26.4577	26.75	26.3723	26.8778	26.1104	26.5837	26.9591	26.7435	26.7098
Q8WUD4	Coiled-coil domain-containing protein 12	CCDC12		28.5115	28.3795	27.9419	28.4337	28.3939	28.5971	28.5502	28.4217	28.2742
Q96CT7	Coiled-coil domain-containing protein 124	CCDC124		30.6312	30.8205	30.9869	30.9487	30.8887	31.1562	30.9607	31.0615	31.0396
Q96BQ5	Coiled-coil domain-containing protein 127	CCDC127		26.6176	26.7426	26.3025	26.3537	27.1688	26.2943	26.8426	26.8054	26.3189
P13994	Coiled-coil domain-containing protein 130	CCDC130		22.6281	23.295	24.0789	NaN	21.314	23.8927	22.0322	21.9784	24.0785
Q96JG6;Q96JG6-3	Coiled-coil domain-containing protein 132	CCDC132		28.2076	27.9056	27.7547	27.7351	28.1835	28.0046	27.9624	28.0572	28.1145
Q9H6E4	Coiled-coil domain-containing protein 134	CCDC134		27.8628	28.0401	28.1906	27.9282	28.1891	28.2198	28.0185	28.1167	28.2815
Q6PK04	Coiled-coil domain-containing protein 137	CCDC137		29.7082	29.8255	30.2064	30.0642	29.8434	29.2467	29.9925	29.6597	29.9908
Q49A88;Q49A88-5	Coiled-coil domain-containing protein 14	CCDC14		22.5115	NaN	21.4794	21.6547	22.0559	21.4339	NaN	NaN	22.5656
Q9P0B6	Coiled-coil domain-containing protein 167	CCDC167		25.2998	23.9521	23.9808	25.7781	23.8661	23.9534	25.7418	21.2794	21.7823
Q5T9S5;Q5T9S5-2	Coiled-coil domain-containing protein 18	CCDC18		25.4232	25.0003	25.1319	25.2593	25.6897	25.3758	25.184	25.322	26.0345
O60826	Coiled-coil domain-containing protein 22	CCDC22		29.2259	29.4974	29.0966	29.2608	29.1538	29.3238	29.1577	29.1465	29.4159
Q86WR0;Q86WR0-2	Coiled-coil domain-containing protein 25	CCDC25		28.7044	28.9888	29.5159	29.002	28.9669	29.5927	28.779	29.0363	29.3291
Q8IWP9	Coiled-coil domain-containing protein 28A	CCDC28A		NaN	21.5253	20.6102	20.0159	21.035	19.3485	20.7828	19.6876	22.2289
Q96MW1;Q96MW1-2	Coiled-coil domain-containing protein 43	CCDC43		28.6775	29.0221	29.0494	29.0778	29.1252	29.1114	28.9196	28.9084	29.1818
Q96A33;Q96A33-2	Coiled-coil domain-containing protein 47	CCDC47		31.6721	31.6168	31.7187	31.6208	31.4157	31.1307	31.7004	31.4365	31.364
Q8IVM0;Q8IVM0-2	Coiled-coil domain-containing protein 50	CCDC50		28.3244	28.5025	28.3531	28.8039	28.8887	28.5723	28.4271	27.6963	28.2164
Q96ER9;Q96ER9-2	Coiled-coil domain-containing protein 51	CCDC51		29.3669	29.71	29.7585	29.7033	29.6237	29.669	29.8132	29.7628	29.7246
Q9Y3C0	WASH complex subunit CCDC53	CCDC53		26.7903	27.0397	27.1157	26.2793	27.0235	26.99	27.4455	27.4783	27.2888
Q4VC31	Coiled-coil domain-containing protein 58	CCDC58		30.6615	30.3124	30.3968	30.5761	30.2839	30.248	30.66	30.3392	30.5881
Q9P031	Thyroid transcription factor 1-associated protein 26	CCDC59		28.3257	28.8065	28.63	28.4914	28.5498	28.39	28.7124	28.4314	28.8537
Q16204	Coiled-coil domain-containing protein 6	CCDC6		30.8033	31.017	31.1909	31.1265	31.1676	31.2551	30.9991	30.8911	31.1965
Q8IV32	Coiled-coil domain-containing protein 71	CCDC71		24.867	23.9542	23.9209	24.3671	24.074	24.7941	24.8228	24.2736	24.5001
Q8N9Z2;Q8N9Z2-2	Coiled-coil domain-containing protein 71L	CCDC71L		28.9723	29.7267	28.7121	28.9119	28.193	28.8425	29.2349	28.3863	28.7623
Q8N4S0;Q8N4S0-2	Coiled-coil domain-containing protein 82	CCDC82		NaN	22.8554	23.4638	22.6393	23.1339	23.5313	22.9242	23.9952	23.6268
Q86UT8	Coiled-coil domain-containing protein 84	CCDC84		23.8436	24.4831	24.0289	24.5014	24.5113	24.5451	25.6412	23.2226	23.8658
Q9H6F5	Coiled-coil domain-containing protein 86	CCDC86		31.0142	31.2608	31.0091	30.8639	31.0871	31.02	31.2168	31.0474	30.9529
Q3V6T2;Q3V6T2-4;Q3V6T2-2;Q3V6T2-3;Q3V6T2-5	Girdin	CCDC88A		27.0731	28.1631	27.7615	27.5268	27.8052	27.5271	27.2252	26.5751	27.4198
Q9P219	Protein Daple	CCDC88C		23.7326	24.4054	23.9402	23.3621	24.0958	24.3897	24.9956	21.3363	23.8726
Q9Y3X0	Coiled-coil domain-containing protein 9	CCDC9		26.9185	27.1034	27.0663	27.1667	27.2822	27.1144	26.8777	26.8734	27.2635
Q9GZT6;Q9GZT6-2;Q9GZT6-3	Coiled-coil domain-containing protein 90B, mitochondrial	CCDC90B		26.0355	25.7857	26.338	26.4104	25.885	25.8281	26.7019	25.0152	26.3016
Q7Z6B0;Q7Z6B0-2;Q7Z6B0-3	Coiled-coil domain-containing protein 91	CCDC91		25.2754	26.0493	25.8825	23.488	24.8279	26.1404	25.0591	25.8712	25.6509
Q567U6	Coiled-coil domain-containing protein 93	CCDC93		28.7892	28.683	28.8858	28.4197	28.3674	28.7251	28.4791	28.4895	28.9774
Q9BW85	Coiled-coil domain-containing protein 94	CCDC94		27.648	27.7421	27.4431	27.7505	27.0486	27.2925	27.6762	27.1472	27.358
Q96F63	Coiled-coil domain-containing protein 97	CCDC97		27.5182	27.9696	27.6711	28.4032	27.4652	27.9575	28.1533	27.9447	27.4002
P20248	Cyclin-A2	CCNA2		27.8007	26.9886	26.7557	27.7286	26.5256	27.4656	27.7422	26.9383	27.2637
P14635;P14635-2	G2/mitotic-specific cyclin-B1	CCNB1		29.0958	28.6521	28.4432	29.1815	28.834	29.1822	29.3054	29.1703	29.1925
O95067	G2/mitotic-specific cyclin-B2	CCNB2		27.3874	27.5378	27.2284	27.4021	27.7423	27.3906	27.5116	27.7701	27.6239
P24863;P24863-2	Cyclin-C	CCNC		26.1234	25.6306	26.014	26.0464	26.1107	26.1859	26.2938	25.8252	25.6521
P24385	G1/S-specific cyclin-D1	CCND1		22.4925	NaN	NaN	21.2296	23.0375	23.7276	22.5595	24.4137	24.0025
P30281;P30281-2	G1/S-specific cyclin-D3	CCND3		23.6429	22.9342	24.1971	23.4114	24.9778	24.4947	NaN	23.739	NaN
O96020;O96020-2	G1/S-specific cyclin-E2	CCNE2		25.5555	24.488	23.9509	24.9183	25.4284	24.0128	25.6298	25.5753	23.9845
P51946	Cyclin-H	CCNH		26.9015	27.2949	27.041	27.4608	26.8045	27.9217	26.9033	27.417	27.1179
O75909;O75909-4;O75909-1;O75909-2	Cyclin-K	CCNK		28.3144	28.0877	28.3293	28.2083	28.4243	28.394	28.5192	28.4325	28.3495
Q9UK58;Q9UK58-4	Cyclin-L1	CCNL1		29.5711	29.4611	24.537	29.3838	26.1377	29.3912	29.6842	29.516	29.5318
Q96S94;Q96S94-2;Q96S94-3	Cyclin-L2	CCNL2		NaN	22.449	22.5615	21.8493	22.9836	NaN	21.4538	23.3278	22.2553
O60563	Cyclin-T1	CCNT1		30.0403	30.0514	29.9606	30.1148	30.349	30.3061	29.7669	30.3123	29.8456
O60583;O60583-2	Cyclin-T2	CCNT2		24.0412	23.2623	NaN	24.1579	23.5746	23.5072	23.5532	24.116	23.0639
Q8ND76;Q8ND76-3;Q8ND76-2	Cyclin-Y	CCNY		25.3961	25.4196	25.7195	25.4413	25.3246	25.1597	25.337	25.1278	25.7639
Q8N7R7;Q8N7R7-3	Cyclin-Y-like protein 1	CCNYL1		24.5098	24.6109	24.7122	24.9267	24.5398	23.9355	24.4126	24.1675	24.0792
Q9ULG6;Q9ULG6-2;Q9ULG6-5;Q9ULG6-4	Cell cycle progression protein 1	CCPG1		26.4899	25.9109	26.1253	26.3689	26.0966	25.5755	26.7633	26.3927	25.6476
Q9UK39	Nocturnin	CCRN4L		24.7561	24.9977	24.561	24.4557	24.8684	25.1141	24.6806	24.2055	23.9984
O14618	Copper chaperone for superoxide dismutase	CCS		29.0844	29.1	29.3183	29.1833	29.02	29.1388	28.8335	30.31	29.2053
Q4G0I0	Protein CCSMST1	CCSMST1		26.2675	26.8404	26.4574	26.1581	26.9543	27.0251	26.3868	26.9965	26.8031
P78371;P78371-2	T-complex protein 1 subunit beta	CCT2		34.9322	34.9358	35.1435	35.0121	35.0771	34.9554	35.0722	35.0258	35.1403
P49368;P49368-2	T-complex protein 1 subunit gamma	CCT3		34.8829	34.7185	34.8369	34.8703	34.7306	34.9061	34.839	34.7849	34.9033
P50991;P50991-2	T-complex protein 1 subunit delta	CCT4		34.9055	34.8062	34.9455	35.0369	34.7104	34.8892	34.9168	34.8064	34.9672
P48643;P48643-2	T-complex protein 1 subunit epsilon	CCT5		34.879	34.8361	34.9058	35.0254	34.9763	34.9307	34.9467	34.9237	35.0029
P40227;P40227-2	T-complex protein 1 subunit zeta	CCT6A		34.7277	34.6413	34.682	34.667	34.6609	34.8081	34.6494	34.6692	34.705
Q99832;Q99832-3;Q99832-4;Q99832-2	T-complex protein 1 subunit eta	CCT7		34.6083	34.577	34.6885	34.6553	34.7021	34.5493	34.6081	34.633	34.6573
P50990;P50990-2;P50990-3	T-complex protein 1 subunit theta	CCT8		35.6543	35.4654	35.498	35.6036	35.3383	35.4576	35.5048	35.5145	35.4987
P86791;P86790	Vacuolar fusion protein CCZ1 homolog;Vacuolar fusion protein CCZ1 homolog B	CCZ1;CCZ1B		28.0316	27.6569	28.2606	27.3638	27.53	28.1022	27.5225	27.5231	28.1009
Q6YHK3;Q6YHK3-4;Q6YHK3-2	CD109 antigen	CD109		30.8783	31.1345	31.3204	30.8901	31.1385	31.2143	30.7759	31.2075	31.3733
P48509	CD151 antigen	CD151		28.3838	28.9126	28.7175	28.6871	28.4216	28.4845	28.741	28.7721	28.4843
Q5ZPR3;Q5ZPR3-4;Q5ZPR3-2;Q5ZPR3-3	CD276 antigen	CD276		28.6219	27.8136	27.5444	29.0569	28.4094	27.6709	28.7626	28.1412	27.9808
Q9Y5K6	CD2-associated protein	CD2AP		29.574	29.7392	29.8689	29.5695	29.9625	30.0977	29.7456	29.9472	30.0667
O95400	CD2 antigen cytoplasmic tail-binding protein 2	CD2BP2		28.3604	28.4183	28.7298	27.9007	28.4309	28.8397	28.4739	28.3024	28.6408
Q9NPF0;Q9NPF0-2	CD320 antigen	CD320		27.0201	27.2735	26.8447	27.672	27.467	26.758	27.724	27.3432	26.345
O15446;O15446-2	DNA-directed RNA polymerase I subunit RPA34	CD3EAP		29.6446	29.8	29.8307	29.4939	29.6115	29.5514	29.3994	29.3714	28.9385
P16070;P16070-18;P16070-12;P16070-14;P16070-13;P16070-11;P16070-10;P16070-16;P16070-8;P16070-17;P16070-6;P16070-4;P16070-3;P16070-7;P16070-5	CD44 antigen	CD44		32.264	32.2101	32.6287	32.2279	32.0067	32.2388	32.0562	32.0159	32.1796
P15529-4;P15529-7;P15529-6;P15529-3;P15529-5;P15529-2;P15529-16	Membrane cofactor protein	CD46		29.1914	29.5422	29.4843	29.2624	29.2445	29.0813	29.066	29.7701	29.4526
P15529;P15529-15;P15529-12;P15529-14;P15529-11;P15529-13;P15529-10;P15529-9;P15529-8	Membrane cofactor protein	CD46		25.3781	25.834	25.6166	25.6035	25.5924	25.9354	25.3185	25.3665	25.845
Q08722;Q08722-3;Q08722-2;Q08722-4	Leukocyte surface antigen CD47	CD47		25.6136	26.8376	25.7771	26.0213	26.6708	25.6611	23.943	26.4892	25.4492
P08174;P08174-2;P08174-4;P08174-3;P08174-5;P08174-6;P08174-7	Complement decay-accelerating factor	CD55		32.766	32.8299	32.8332	32.6483	32.782	32.6307	32.5142	32.7501	32.4387
P19256-3;P19256;P19256-2	Lymphocyte function-associated antigen 3	CD58		27.7081	27.0596	27.558	27.4735	27.006	27.2099	27.5788	27.6607	26.9915
P13987	CD59 glycoprotein	CD59		31.1277	31.847	31.5526	31.6756	31.3772	31.9817	31.5321	31.8537	31.7098
P08962;P08962-3;P08962-2	CD63 antigen	CD63	1	29.9126	29.8673	30.1945	29.9855	29.8853	30.2093	30.0647	29.9473	29.8625
P32970;P32970-2	CD70 antigen	CD70		27.2429	28.0873	28.1005	27.2473	27.351	27.7367	26.7885	26.6589	27.5313
P60033	CD81 antigen	CD81		28.5821	28.2671	27.7839	28.7083	28.0248	28.2373	28.3774	28.1515	28.2208
Q01151	CD83 antigen	CD83		23.1044	23.8871	24.854	26.0284	24.2122	26.098	25.2093	24.6687	26.257
P21926	CD9 antigen	CD9		31.7472	31.5233	31.529	31.5831	31.5623	31.8793	31.5386	31.8847	31.5217
P48960;P48960-2;P48960-3	CD97 antigen;CD97 antigen subunit alpha;CD97 antigen subunit beta	CD97		29.6017	29.5488	29.2613	29.3434	29.4595	29.2338	29.3445	29.1137	29.3087
P14209;P14209-2;P14209-3	CD99 antigen	CD99		28.8615	29.4862	29.2276	28.8569	29.0232	29.5606	29.0334	29.3965	29.6454
Q8TCZ2-5;Q8TCZ2;Q8TCZ2-3;Q8TCZ2-2;Q8TCZ2-6	CD99 antigen-like protein 2	CD99L2		27.2611	27.4913	26.4123	26.2937	26.9763	27.1571	26.2187	27.1988	26.1163
P32320	Cytidine deaminase	CDA		27.2645	28.317	28.1127	27.7398	27.984	28.2411	28.3585	28.081	27.8715
Q8IWY9;Q8IWY9-1	Codanin-1	CDAN1		24.4918	24.7231	24.139	24.0735	23.266	25.0594	25.0275	23.181	24.5743
O75794	Cell division cycle protein 123 homolog	CDC123		30.2005	30.1869	30.1791	30.5658	30.6478	30.365	30.1769	30.2399	30.4018
Q13042;Q13042-3;Q13042-2;Q13042-4	Cell division cycle protein 16 homolog	CDC16		29.4874	29.759	29.4498	29.6795	29.7803	29.5563	29.8313	29.4912	29.7147
Q12834	Cell division cycle protein 20 homolog	CDC20		27.6785	26.7946	26.6317	27.125	27.2014	26.891	27.5287	27.3219	27.0682
Q9UJX2;Q9UJX2-3	Cell division cycle protein 23 homolog	CDC23		29.4487	29.6073	29.5562	29.5225	29.2335	29.7004	29.596	29.4931	29.5757
P30305-4;P30305;P30305-2;P30305-3	M-phase inducer phosphatase 2	CDC25B		28.1945	27.8047	27.1523	28.4722	27.6818	27.664	28.1955	27.6524	25.2426
P30307;P30307-3;P30307-4;P30307-2	M-phase inducer phosphatase 3	CDC25C		NaN	NaN	NaN	NaN	23.3696	NaN	19.9049	20.4939	20.6321
Q8NHZ8	Anaphase-promoting complex subunit CDC26	CDC26		26.6592	26.2962	25.6463	26.5591	27.1139	25.4861	26.6279	26.6658	25.0003
P30260;P30260-2	Cell division cycle protein 27 homolog	CDC27		29.9115	29.7078	29.5219	29.9502	29.7694	29.9223	30.013	29.9423	29.5876
P49427	Ubiquitin-conjugating enzyme E2 R1	CDC34		27.0362	27.7456	27.7984	27.4003	27.8415	27.5745	27.1301	27.8814	27.6111
Q16543	Hsp90 co-chaperone Cdc37;Hsp90 co-chaperone Cdc37, N-terminally processed	CDC37		32.176	32.3485	32.474	32.1982	32.1417	32.3462	32.2366	32.4137	32.5804
Q7L3B6	Hsp90 co-chaperone Cdc37-like 1	CDC37L1		27.7266	28.0369	27.417	28.0649	27.8236	27.2913	27.4535	27.797	27.6533
O60508	Pre-mRNA-processing factor 17	CDC40		29.2803	29.487	29.5172	29.5899	29.6284	29.7842	29.7683	29.6768	29.7841
P60953;P60953-1	Cell division control protein 42 homolog	CDC42		32.4474	32.5009	32.4364	32.2329	31.8931	32.6317	32.1393	32.3567	32.7057
Q5VT25;Q5VT25-4;Q5VT25-5;Q5VT25-2;Q5VT25-6;Q5VT25-3	Serine/threonine-protein kinase MRCK alpha	CDC42BPA		27.7531	28.3712	28.5914	27.9068	27.7643	28.412	27.3421	28.2088	28.1982
Q9Y5S2	Serine/threonine-protein kinase MRCK beta	CDC42BPB		29.3755	29.6975	29.4389	29.3871	29.5591	29.7578	29.237	29.7344	29.5063
Q00587;Q00587-2	Cdc42 effector protein 1	CDC42EP1		27.0926	27.1754	27.4162	26.9026	26.5484	27.0373	27.0675	26.2786	26.7625
Q9H3Q1;Q9H3Q1-2	Cdc42 effector protein 4	CDC42EP4		28.8775	29.5588	29.1561	29.1526	29.2383	29.2007	28.6188	29.0011	29.0704
Q9NRR3	CDC42 small effector protein 2	CDC42SE2		26.695	26.6416	26.3891	26.0607	26.117	26.1554	26.7745	26.7007	26.5324
O75419-2;O75419;O75419-3	Cell division control protein 45 homolog	CDC45		28.7329	28.9287	29.4331	29.0441	29.2826	29.4859	28.8273	29.1051	28.825
Q99459	Cell division cycle 5-like protein	CDC5L		32.5087	32.1695	32.2407	32.2749	32.1018	32.2087	32.6207	32.2744	32.3067
Q99741	Cell division control protein 6 homolog	CDC6		26.0194	24.4474	25.4719	25.8452	25.178	25.7332	25.6902	25.2787	25.6077
O00311	Cell division cycle 7-related protein kinase	CDC7		24.4199	24.378	24.1047	24.8823	23.9095	24.1906	25.284	24.3875	24.3142
Q6P1J9	Parafibromin	CDC73		31.0436	31.0587	30.8684	31.1756	30.9023	31.0577	31.2266	30.9898	30.954
Q69YH5	Cell division cycle-associated protein 2	CDCA2		28.1353	27.8475	27.4066	28.1473	28.2278	28.0376	28.1829	28.0804	27.6136
Q99618	Cell division cycle-associated protein 3	CDCA3		27.6035	27.8704	27.461	27.74	27.7804	27.7458	27.7619	28.0369	27.6862
Q96FF9	Sororin	CDCA5		25.5708	25.7892	25.9334	26.1772	25.6055	26.2105	26.5241	26.3774	26.37
Q9BWT1;Q9BWT1-3;Q9BWT1-5;Q9BWT1-6;Q9BWT1-2	Cell division cycle-associated protein 7	CDCA7		25.3225	24.892	24.7573	25.1126	25.1689	24.7343	25.5702	25.2123	24.9025
Q96GN5;Q96GN5-4;Q96GN5-2;Q96GN5-5	Cell division cycle-associated 7-like protein	CDCA7L		27.657	27.7592	27.6118	26.9682	27.474	27.2137	27.8317	27.7601	27.5845
Q53HL2	Borealin	CDCA8		28.7955	28.3207	28.5208	29.0497	28.3446	28.6857	28.7626	28.7183	28.7572
Q9Y6N8	Cadherin-10	CDH10		26.8954	27.0716	26.8147	26.7537	27.2037	27.0994	24.9059	25.0674	24.9821
Q9H159;Q9H159-2	Cadherin-19	CDH19		24.4078	28.2786	28.4151	25.7304	28.416	28.2602	26.4899	27.9811	28.6181
O14735;O14735-3	CDP-diacylglycerol--inositol 3-phosphatidyltransferase	CDIPT		26.5567	26.8564	26.8525	26.8049	26.0994	25.645	26.5089	25.8874	26.8385
P06493;P06493-2	Cyclin-dependent kinase 1	CDK1		33.0185	33.1281	33.1341	33.1067	33.2	33.2348	33.0311	33.0413	33.0212
Q15131;Q15131-4;Q15131-7;Q15131-2	Cyclin-dependent kinase 10	CDK10		22.3011	22.1627	NaN	22.9504	21.8209	22.8923	22.9357	23.1673	21.5507
P21127-8;P21127-3;P21127-2;P21127;P21127-9;P21127-6;P21127-10;P21127-12;P21127-4;P21127-5;Q9UQ88-9	Cyclin-dependent kinase 11B;Cyclin-dependent kinase 11A	CDK11B;CDK11A		29.7143	30.2588	29.9854	30.1688	30.0286	29.869	29.7167	30.2382	30.1208
Q9NYV4;Q9NYV4-2;Q9NYV4-3	Cyclin-dependent kinase 12	CDK12		30.6798	30.9167	30.9003	30.3547	30.8616	30.9647	30.7087	30.8913	31.1215
Q14004-2;Q14004	Cyclin-dependent kinase 13	CDK13		26.862	27.1513	27.2155	25.9809	26.6757	26.9021	26.9938	26.9759	26.7557
Q00536;Q00536-2;Q00536-3	Cyclin-dependent kinase 16	CDK16		25.3883	24.0329	24.5464	26.4766	25.9345	24.9177	24.9008	23.1874	23.8439
Q00537;Q00537-2	Cyclin-dependent kinase 17	CDK17		25.4017	25.2318	26.0386	26.1907	25.439	26.2424	24.9215	24.9198	25.3759
Q9BWU1;Q9BWU1-2	Cyclin-dependent kinase 19	CDK19		24.2269	24.0027	23.6304	24.2016	24.371	23.0381	24.323	23.5948	23.6869
P24941;P24941-2	Cyclin-dependent kinase 2	CDK2		31.1875	30.9996	31.1849	31.4729	31.2568	31.4431	31.5546	31.4153	31.4397
O14519;O14519-2;O75956	Cyclin-dependent kinase 2-associated protein 1;Cyclin-dependent kinase 2-associated protein 2	CDK2AP1;CDK2AP2		28.5908	28.7072	28.1792	28.7356	28.8088	28.1399	28.4277	28.7667	28.1513
P11802	Cyclin-dependent kinase 4	CDK4		30.3086	30.1337	29.9695	30.3562	29.8911	30.3235	30.0203	30.1887	29.8737
Q00535;Q00535-2	Cyclin-dependent-like kinase 5	CDK5		29.3522	29.2166	29.6169	29.2352	29.3509	29.1181	29.1492	29.2021	29.436
Q96SZ6;Q96SZ6-3;Q96SZ6-2;Q96SZ6-6;Q96SZ6-4;Q96SZ6-5	CDK5 regulatory subunit-associated protein 1	CDK5RAP1		26.8637	26.9479	27.3762	27.2726	26.8056	27.3536	27.4629	27.0941	27.5101
Q96SN8;Q96SN8-4;Q96SN8-3;Q96SN8-2	CDK5 regulatory subunit-associated protein 2	CDK5RAP2		25.8604	24.8732	24.6838	24.7197	25.4103	25.4596	24.5846	25.069	25.5726
Q96JB5;Q96JB5-2	CDK5 regulatory subunit-associated protein 3	CDK5RAP3		29.0465	29.242	28.9744	29.3896	29.2795	29.2431	29.5156	29.2488	28.7811
Q00534	Cyclin-dependent kinase 6	CDK6		27.7579	27.375	27.2762	28.0695	28.177	27.9297	27.9403	27.4436	27.7551
P50613	Cyclin-dependent kinase 7	CDK7		27.8626	28.0465	28.6389	27.7767	28.2435	27.9569	27.3428	28.3308	28.0993
P49336;P49336-2	Cyclin-dependent kinase 8	CDK8		26.158	27.0081	26.2982	26.3456	26.4866	26.8979	26.4636	26.7436	26.3504
P50750;P50750-2	Cyclin-dependent kinase 9	CDK9		29.106	29.2593	29.0544	29.3198	29.2253	29.0037	29.2954	29.3806	29.1036
Q5VV42;Q5VV42-2	Threonylcarbamoyladenosine tRNA methylthiotransferase	CDKAL1		27.9222	28.1498	28.1017	27.818	28.1986	28.1732	27.7774	28.3899	28.3635
P49918;P49918-2	Cyclin-dependent kinase inhibitor 1C	CDKN1C		21.6591	21.895	21.419	21.8552	21.4569	19.7743	NaN	NaN	21.4181
P42771;P42771-4;P42771-2	Cyclin-dependent kinase inhibitor 2A	CDKN2A		31.2682	31.1713	31.0302	31.3416	31.549	31.2037	30.8222	31.1232	30.8818
Q9NXV6	CDKN2A-interacting protein	CDKN2AIP		29.794	29.962	29.9976	29.843	29.857	29.979	30.0608	30.0872	29.9314
Q6NVV7	Cysteine-rich DPF motif domain-containing protein 1	CDPF1		23.7803	24.2997	22.5202	23.6612	23.9825	24.9393	24.3077	24.6922	25.117
[truncated: 6,499 more rows]

## Sheet: Organellar maps data
Majority protein IDs	Protein names	Gene names	Organellar Markers	Ratio H/L R1_C2_03	Ratio H/L R1_C2_06	Ratio H/L R1_C2_12	Ratio H/L R1_C2_24	Ratio H/L R1_C2_80	Ratio H/L R1_C6_03	Ratio H/L R1_C6_06	Ratio H/L R1_C6_12	Ratio H/L R1_C6_24	Ratio H/L R1_C6_80	Ratio H/L R1_Con_03	Ratio H/L R1_Con_06	Ratio H/L R1_Con_12	Ratio H/L R1_Con_24	Ratio H/L R1_Con_80	Ratio H/L R2_C2_03	Ratio H/L R2_C2_06	Ratio H/L R2_C2_12	Ratio H/L R2_C2_24	Ratio H/L R2_C2_80	Ratio H/L R2_C6_03	Ratio H/L R2_C6_06	Ratio H/L R2_C6_12	Ratio H/L R2_C6_24	Ratio H/L R2_C6_80	Ratio H/L R2_Con_03	Ratio H/L R2_Con_06	Ratio H/L R2_Con_12	Ratio H/L R2_Con_24	Ratio H/L R2_Con_80	Ratio H/L R3_C2_03	Ratio H/L R3_C2_06	Ratio H/L R3_C2_12	Ratio H/L R3_C2_24	Ratio H/L R3_C2_80	Ratio H/L R3_C6_03	Ratio H/L R3_C6_06	Ratio H/L R3_C6_12	Ratio H/L R3_C6_24	Ratio H/L R3_C6_80	Ratio H/L R3_Con_03	Ratio H/L R3_Con_06	Ratio H/L R3_Con_12	Ratio H/L R3_Con_24	Ratio H/L R3_Con_80
[truncated: 2,046 more rows]

[truncated: 3 more sheets: MR plot data, Enrichment of MR plot hits, Notes]
